# Supplementary material for: Fine-Tuning Tomato Agronomic Properties by Computational Genome Redesign
Source: PLoS Comput Biol. 2012 Jun 7;8(6):e1002528. doi: 10.1371/journal.pcbi.1002528 (PMC3369923; doi:10.1371/journal.pcbi.1002528)
Supplement: Dataset S1 — Transcriptional, metabolic and phenotypic models of tomato fruit. (XLS) [file pcbi.1002528.s001.xls]

## Sheet: genes
		SGN-U226366	SGN-U216816	SGN-U222941	SGN-U221253	SGN-U214534	SGN-U220722	SGN-U214293	SGN-U220031	SGN-U224563	SGN-U219794	SGN-U215151	SGN-U216651	SGN-U222408	SGN-U224300	SGN-U221898	SGN-U213522	SGN-U225843	SGN-U216997	SGN-U213952	SGN-U218432	SGN-U214600	SGN-U219438	SGN-U213682	SGN-U218173	SGN-U220297	SGN-U221683	SGN-U224486	SGN-U216554	SGN-U240820	SGN-U223767	SGN-U232813	SGN-U217574	SGN-U226549	SGN-U216717	SGN-U222007	SGN-U221418	SGN-U227476	SGN-U221880	SGN-U226303	SGN-U220825	SGN-U221854	SGN-U218212	SGN-U221638	SGN-U213788	SGN-U224532	SGN-U218886	SGN-U220195	SGN-U218673
sgn2 annotation	sgn3 annotation	SGN-U320763	SGN-U318433	SGN-U325709	SGN-U324134	SGN-U312350	SGN-U322998	SGN-U315395	SGN-U320333	SGN-U326082	SGN-U322374	SGN-U315909	SGN-U318233	SGN-U323656	SGN-U326276	SGN-U321887		SGN-U327962	SGN-U317447	SGN-U315380	SGN-U317996	SGN-U315162	SGN-U317197	SGN-U313246	SGN-U320525	SGN-U320219	SGN-U324373	SGN-U318110	SGN-U318609	SGN-U340052	SGN-U327094		SGN-U315065	SGN-U325285	SGN-U318101	SGN-U314817	SGN-U324429	SGN-U328055	SGN-U320355	SGN-U318556	SGN-U320517	SGN-U322938	SGN-U318328	SGN-U322334	SGN-U313933	SGN-U321020	SGN-U319870	SGN-U317163	SGN-U319429
SGN-U226366	SGN-U320763	0	0	0	0	0	0.0685911	0	0	0	0	0	0	0	0	0	0	0	0	0	0	0	0	0	0	0	0	0	0	0	0	0	0	0	0	0	0	0	0	0	0	0	0	0	0	0	0	0	0
SGN-U216816	SGN-U318433	0	0	0	0	0	0	0	0	0	0	0	0	0	0	0	0	0	0	0	0	0	0	0	0	0	0	0	0	0	0	0	0	0	0	0	0	0	0	0	0	0	0	0	0	0	0	0	0
SGN-U222941	SGN-U325709	0	0	0	0	0	0	0	0	0	0	0	0	0	0	0	0	0	0	0	0	0	0	0	0	0	0	0	0	0	0	0	0	0	0	0	0	0.143529	0	0	0	0	0	0	0	0	0	0	0
SGN-U221253	SGN-U324134	0	0	0	0	0	0	0	-0.233015	0	0	0	0	0	0	0	0	0	0	0	0	0	0	0	0	0	0	0	0	0	0	0	0	0	0	0	0	0	0	0	0	0	0	0	-0.0292062	0	0	0	0
SGN-U214534	SGN-U312350	0	0	0	0	0	0	0	0	0	0	0	0	0	0	0	0	0	0	0	0	0	0	0	0	0	0	0	0	0	0	0	0	0	0	0	0	0	0	0	0	0	0	0	0	0	0	0	0
SGN-U220722	SGN-U322998	0.22836	0	0	0	0	0	0	0	0	0	0	0	0	0	0	0	0	0	0	-0.0156266	0	0.0129712	0	0	0	0	0	0	0	0	0	0	0	0	0	0	0	0	0	0	0	0	0	0	0	0	0	0
SGN-U214293	SGN-U315395	0	0	0	0	0	0	0	0	0	0	0	0	0	0	0	0	0	0	0	0	0	0	0	0	0	0	0	0	0	0	0.0595714	0	0	0	0	0	0	0	0	0	0	0	0.112354	0	0	0	0	0
SGN-U220031	SGN-U320333	0	0	0	-0.0242534	0	0	0	0	0	-0.0512699	0	0	0	0	0	0	0	0	0	0	0	0	0	0	0	0	0	0	0	0	0	0	0	-0.296152	0	0	0	0	0	-0.129936	0	0	0	0	0	0	0	0
SGN-U224563	SGN-U326082	0	0	0	0	0	0	0	0	0	0	0	0	0	0	0	0	0	0	0	0	0	0	0	0.193487	0	0	0	0	0	0	0	0	0	0	0	0	0	0	0	0	0	0	0	0	0	0	0	0
SGN-U219794	SGN-U322374	0	0	0	0	0	0	0	0	0	0	0	0	0	0	0	0	0	0	0	0	0	-0.131493	0	0	0	0	0	0	0	0	0	0	0	0	0	0.0591736	0	0	0	0	0	0	0	0	0	0	0	0
SGN-U215151	SGN-U315909	0	0	0	0	0	0	0	0	0	0	0	0	0	0	0	0	0	0.0268475	0	0	0	0	0	0	0	0	0	0	0	0	0	0	0	0	0.0607361	0	0	0	0	0	0	0	0	0	0	0	0	0
SGN-U216651	SGN-U318233	0	0	0	0	0	0	0	0	0	0	0	0	0	0	0	0	0	0	0	0	0	0	0	0	0	0	0	0	0	0	0	0	0	0	0	0	0	0	0	0	0	0	0	0	0	0	0	0
SGN-U222408	SGN-U323656	0	0	0	0	0	0	0	0	0	0	0.0977268	0	0	0	0	0	0	0	0	0	0	0	0	0	0	0	0	0	0	0	0	0	0	0	0.462925	0	0	0	0	0	0	0	0	0	0	0	0	0
SGN-U224300	SGN-U326276	0	0	0	0	0	0	0	0	0	0	0	0	0	0	0	0	0	0	0	0	0	0	0	0	0	0	0	0	0	-0.0163399	0	0	0	0	0	0	0	0	0	0	0	0	0	0	0	0	0	0
SGN-U221898	SGN-U321887	0	0	0	0	0	0	0	0	0	0	0	0	0	0	0	0	0	0	0	0	0	0.128558	0	0	0	0	0.0321898	0	0	0	0	0	0	0	0	0	0	0	0	0	0	0	0	0	0	0	0	0
SGN-U213522		0	0	0	0	0	0	0	0	0	0	0	0	0	0	0	0	0	0	0	0	0	0	0	0	0	0	0	0	0	0	-0.236134	0	0	0	0.282295	0	0	0	0	0	0	0	-0.00615666	0	0	0	0	0
SGN-U225843	SGN-U327962	0	0	0	0	0	0	0	0	0	0	0	0	0	0	0	0	0	0	0	0	0	0	0	0	0	0	0	0	0	0	0	0	0	0	0	0	0	0	0	0	0	0	0	0	0	0	0	0
SGN-U216997	SGN-U317447	0	0	0	0	0	0	0	0	0	0	0	0	0	0	0	0	0	0	0	0	0	0	0	0	0	0	0	0	0	0	0	0	0	0	0	0	0	0	0	0	0	0	0	0	0	0	0	0
SGN-U213952	SGN-U315380	0	0	0	0	0	0	0	0	0	0	0	0	0	0	0	0	0	0	0	0	0	0	0	0	0	0	0	0	0	0	0	0	0	0	0	-0.00565586	0	0	0.0101745	0	0	0.0525544	0	0	0	0	0	0
SGN-U218432	SGN-U317996	0	0	0	0	0	-0.0172984	0	0	0	0	0	0	0	0	0	0	0	0	0	0	0	0	0	0	0	0	0	0	0	0	0	-0.025132	0	0	0	0	0	0	0	0	0	0	0	0	0	0	0	0
SGN-U214600	SGN-U315162	0	0	0	0	0	0	0	0	0	0	0	0	0	0	0	0	0	0	0	0	0	0	0	0.0403484	0	0	0	0	0	0	0	0	0	0	0	0	0	0	0	0	0	0	0	0	0.237717	0	0	0
SGN-U219438	SGN-U317197	0	0	0	0	0	0	0	0	0	-0.0312391	0	0	0	0	0	0	0	0	0	0	0	0	0	0	0	0	0	0	0	0	0	0	0	0	0	0	0	0	0	0	0	0	0	0	0	0	0	0
SGN-U213682	SGN-U313246	0	0	0	0	0	0	0	0	0	0	0	0	0	0	0	0	0	0	0	0	0	0	0	0	0	0	0	0	0	0	0	0	0	0	0	0	0	0	0	0	0	0	0	0	0	0	0	0
SGN-U218173	SGN-U320525	0	0	0	0	0	0	0	0	0.0394823	0	0	0	0	0	0	0	0	0	0	0	0.0540812	0	0	0	0	0	0	0	0	0	0	0	0	0	0	0	0	0	0	0	0	0	0	0	0	0	0	0
SGN-U220297	SGN-U320219	0	0	0	0	0	0	0	0	0	0	0	0	0	0	0	0	0	0	0	0	0	0	0	-0.100778	0	0	0	0	0	0	0	0	0	0	0	0	0	0	0	0	0	0	0	0	0	0	0.274682	0
SGN-U221683	SGN-U324373	0	0	0	0	0	0	0	0	0	0	0	0	0	0	0	0	0	-0.0442554	0	0	0	0	0	0	0	0	0	0	0	0	0	0	0	0	0	0	0	0	0	0	0	0	0	0	0	0.144597	0	0
SGN-U224486	SGN-U318110	0	0	0	0	0	0	0	0	0	0	0	0	0	0	0.0782322	0	0	0	0	0	0	0	0	0	0	0	0	0	0	0	0	0	0	0	0	0	0	0	0	0	0	0	0	0	0	0	0	0
SGN-U216554	SGN-U318609	0	0	0	0	0	0	0	0	0	0	0	0	0	0	0	0	0	0	0	0	0	0	0	0	0	0	0	0	0	0	0	-0.0650803	0	0	0	0	0	0.0542068	0	0	0	0	-0.0100086	0	0	0	0	0
SGN-U240820	SGN-U340052	0	0.101504	0	0	0	0	0	0	0	0	0	0	0	0	0	0	0	0	0	0	0	0	0	0	0	0	0.0158285	0	0	0	0	0	0	0	0	0	0	0	0	0	0	0	0	0	0	0	0	0
SGN-U223767	SGN-U327094	0	0	0	0	0	0	0	0	0	0	0	0	0	0	0	0	0	0	0	0	0	0	0	0	0	0	0	0	0	0	0	0	0	0	0	0	0	0	0	0	0	0	0	0	0	0	0	0
SGN-U232813		0	0	0	0	0	0	0.0464651	0	0	0	0	0	0	0	0	-0.289561	0	0	0	0	0	0	0	0	0	0	0	0	0	0	0	0	0	0	0	0	0	0	0	0	0	0	0	0	0	0	0	0
SGN-U217574	SGN-U315065	0	0	0	0	0	0	0	0	0	0	0	0	0	0	0	0	0	0	0	0	0	0	0	0	0	0	0	0	0	0	0	0	0	0	0	0	0	0	0	0	0	-0.0232382	0	0	0	0	0	0
SGN-U226549	SGN-U325285	0	0	0	0	0	0	0	0	0	0	0	0	0	0	0	0	0	0	0	0	0	0	0	0	0	0	0	0	0	0	0	0	0	0	0	0	0	0	0	0	0	0	0	0	0	0	0	0
SGN-U216717	SGN-U318101	0	0	0	0	0	0	0	-0.0628273	0	0	0	0	0	0	0	0	0	0	0	0	0	0	0	0	0	0	0	0	0	0	0	0	0	0	0	0	0	0	0	0	0	0	0	0	0	0	0	0
SGN-U222007	SGN-U314817	0	0	0	0	0	0	0	0	0	0	0.0476633	0	0.0813654	0	0	0.155813	0	0	0	0	0	0	0	0	0	0	0	0	0	0	0	0	0	0	0	0	0	0	0	0	0	0	0	0	0	0	0	0
SGN-U221418	SGN-U324429	0	0	0	0	0	0	0	0	0	0.0574119	0	0	0	0	0	0	0	0	0	0	0	0	0	0	0	0	0	0	0	0	0	0	0	0.233364	0	0	0	0	0	0	0	-0.148638	0	-0.000711397	0	0	0	0
SGN-U227476	SGN-U328055	0	0	0.099595	0	0	0	0	0	0	0	0	0	0	0	0	0	0.109791	0	0	0	0	0	0	0	0	0	0	0	0	0	0	0	0	0	0	0	0	0	0	0	0	0	0	0	0	0	0	0
SGN-U221880	SGN-U320355	0	0	0	0	0	0	0	0	0	0	0	0	0	0	0	0	0	0	0	0	0	0	0	0	0	0	0	0	0	0	-0.0692824	0	0	0	0	0	0	0	0	0	0	0	0	0	0	0	0	0
SGN-U226303	SGN-U318556	0	0	0	0	0	0	0	0	0	0	0	0	0	0	0	0.0784214	0	0	0	0	0	0	0	0	0	0	0	0	0	0	0	0	0	0	0	0	0	0	0	0	0	0	0	0	0	0	0	0
SGN-U220825	SGN-U320517	0	0	0	0	0	0	0	0.0450814	0	0	0	0	0	0	0	0	0	0	0	0	0	0	0.0326022	0	0	0	0	0	0	0	0	0	0	0	0	0	0	0	0	0	0	0	0	0	0	0	0	0
SGN-U221854	SGN-U322938	0	0	0	0	0	0	0	0	0	0	0	0	0	0	0	0	0	0	0	0	0	0	0	0	0	0	0	0	0	0	0	0	0	0	0	0	0	0	0	0	0	0	0	0	0	0	0	-0.161082
SGN-U218212	SGN-U318328	0	0	0	0	0	0	0	0	0	0	0	0	0	0	0	0	0	0	0	0	0	0	0	0	0	0	0	0	0	0	0	0	0	0	0	-0.055649	0	0	0	0	0	0	0	0	0	0	0	0.00647067
SGN-U221638	SGN-U322334	0	0	0	0	0	0	0	0	0	0	0	0	0	0	0	0	0	0	0	0	0	0	0	0	0	0	0	-0.0716985	0	0	0	0	0	0	0	0	0	0	0	0	0	0	0	0	0	0	0	0
SGN-U213788	SGN-U313933	0	0	0	-0.0810566	0	0	0	0	0	0	0	0	0	0	0	0	0	0	0	0	-0.634226	0	0	0	0	0	0	0.0230988	0	0	0	0	0	0	0	0.253775	0	0	0	0	0	0	0	0	0	0	0	0
SGN-U224532	SGN-U321020	0	0	0	0	0	0	0	0	0	0	0	0	0	0	0	0	0	0	0	0	0.20107	0	0	0	0	0	0	0	0	0	0	0	0	0	0	0	-0.0515367	0	0	0	0	0	0	0	0	0	0	0
SGN-U218886	SGN-U319870	0	0	0	0	0	0	0	0	0	0	0	0	0	0	0	0	0	0	0	0	0	0	0	0	0	0	0.0275892	0	0	0	0	0	0	0	0	0	0	0	0	-0.0435425	0	0	0	0	0	0	0	0
SGN-U220195	SGN-U317163	0	0	0	0	0	0	0	0	0	0	0	0	0	0	0	0	0	0	0	0	0	0	0	0	0.177254	0	0	0	0	0	0	0	0	0	0	0	0.00600535	0	0	0	0	0	0	0	0	0	0	0
SGN-U218673	SGN-U319429	0	0	0	0	0	0	0	0	0	0	0	0	0	0	0	0	0	0	0	0	0	0	0	0	0	0	0	0	0	0	0	0	0	0	0	0	0	0	0	0	0	0.0915006	0	0	0	0	0	0
SGN-U226447	SGN-U324732	0	0	0	0	0	0	0	0	0	0	0	0	0	0	0	0	0	0	0	0	0	0	0	-0.0366952	0	0	0	0	0	0	0	0	0	0	0	0	0	0	0	0	0	0	0	0	0	0	0.0357439	0
SGN-U221750	SGN-U320809	0	0	0	0	0	0	0	0	0	0	0	0	0	0	0	0	0	0	0	0	0	0.086715	0	0	0	0	0	0	0	0	0	0	0	0	0	0	0	0	0	0	0	0	0	0	0	0	0	0
SGN-U219533	SGN-U321805	0	0	0	0	0	0	0	0	0	0	0	0	0	0	0	0	0	0	0	0	0	0	0	0	0	0	0	0	0	0	0	0	0	0	0	0	0	0	0	0	0	0	0	0	0	0	0	0
SGN-U216771	SGN-U318764	0	0	0	0	0	0	0	0	0	0	0	0	0	0	0	0	0	0	0	0	0	0	0	0	0	0	0	0	0	0	0	0	0	0	0	0	0	0	0	0	0	0.0307615	0	0	0	0	0	0
SGN-U214750	SGN-U315883	0	0	0	0	0	0	-0.0551812	0	0	0	0	-0.372213	0	0	0	0	0	0	0	0	0	0	0	0	0	0	0	0	0	0	0	0	0	0	0	0	0	0	0	0	0	0	0	0	0	0	0	0
SGN-U215827	SGN-U317113	0	0	0	0	0	0	0	0	0	0	0	0	0	0	0	0	0	0	0	0	0	0	0	0	0	0	0	0	0	0	0	0	0	0	0	0	0	0	0.184753	0	0	0	0	0	0	0	0	0
SGN-U218373	SGN-U319754	0	0	0	0	0	0	0	0	0	0	0	0	0	0	0	0	0	0	0	0	0	0	0	0	0	0	0	0	0	0	0	0	0	0	0	0	0	0	0	0	0	0	0	0	0	0	0	0
SGN-U222023	SGN-U324522	0	0	0	0	0	0	0	0	0	0	0	0	0	0	0	0	0	0	0	-0.0659536	0	0	0	0	0	0	0	0	0	0	0	0	0	0	0	0	0	0	0	0	0	0	0	0	0	0	0	0
SGN-U217122	SGN-U318455	0	0	0	0	0	0	0	0	0	0	0	0	0	0	0	0	0	0	0	0	0	0	0	0	0	0	0	0	0	0	0	0	0	0	0	0	0	0	0	0	0	0.0779105	0.111458	0	0	0	0	0
SGN-U215309	SGN-U313859	0	0	0	0	0	0	0	0	0	0	-0.0523683	0	0	0	0	0	0	0	0	0	0	0	0	0	0	0	0	0	0	0	0	0	0	0	0	0	0	0.0474114	0	0	0	0	0	0	0	0	0	0
SGN-U218089	SGN-U319146	0	0	0	0	0	0	0	0	0	0	0	0	0	0	0	0	0	0	0	0	0	0	0	0	0	0	0	0	0	0	0	0	0	0	0	0	0	0	0	0	0	0	0	-0.0106359	0	0	0	0
SGN-U221094	SGN-U324094	0	0	0	0	0	0	0	0	0	0	0	0	0	0	0	0	0	0	0	0	0	0	0	0	0	0	0	0	0	0	0	0	0	0	0	0	0	0	0	0	0	0	0	0	0	0	0	0
SGN-U231937	SGN-U323558	0	0	0.0500284	0	0	0	0	0	0	0	0	0	0	0	0	0	0	0	0	0	0	0	0	0	0	0	0	0	0	0	0	0	0	0	0	0	0	0	0	0	0	0	0	0	0	0	0	0
SGN-U218204	SGN-U318406	0.393037	0	0	0	0	0	0	0	0	0	0	0	0	0	0	0	0	0	0	0	0	0	0	0	0	0	0	0	0	0	0	0	0	0	0	0	0	0	0	0	0	0	0	0	0	0	0	0
SGN-U222121		0	0	0	0	0	0	0	0	0	0	0	0	0	0	0	0	0	0	0	0	0	0	0	0	0	0	0	0	0	0	0	0	0	0	0	0	0	0	0	0	0	0	0	0	0	0	0	0
SGN-U222430	SGN-U323659	0	0	0	0	0	0	0	-0.183636	0	0	0	0	0	0	0	0	0	0	0	0	0	0	0	0	0	0	0	0	0	0	0	0	0	0	0	0	0	0	0	0	0	0	0	0	0	0	0	0
SGN-U227770	SGN-U327664	0	0	0	0	0	0	0	0	0.0826	0	0	0	0	0	0	0	-0.118368	0	0	0	0	0	0	0	0	0	0	0	0	0	0	0	0.109265	0	0	0	0	0	0	0	0	0	0	0	0	0	0	0
SGN-U214846	SGN-U315955	0	0	0	0	0	0	0	0	0	0	0	0	0	0	0	0	0	0	0	0	0	0	0	0	0	0	0	0	0	0	0	0	0	0	0	0	0	0	0	0	0	0	0	0	0	0	0	0
SGN-U213013		0	0	0	0	0	0	0	0	0	0	0	0	0	0	0	0	0	0	0	0	0	0	0	0	0	0	0	0	0	0	0	0	0	0	0	0	0	0	0	0	0	0	0	0	0	0	0	0
SGN-U219672	SGN-U320757	0	0	0	0	0	0	0	0	0	0	0	0	0	0	0	0	0	0	0	0.0696326	0.292204	0	0	0	0	0	0	0	0	0	0	0	0	0	0	0	0	0	0	0	0	0	0	0	0	0	0	0
SGN-U214772	SGN-U315719	0	0	0	0	0	0	0	0	0	0	0	0	0	0	0	0	0	0	0	0	0	0	0	0	0	0	0	0	0	0	0	0	0	0	0	0	0	0	0	0	0.119409	0	0	0	0	0	0	0
SGN-U220352		0	0	0	0	0	0	0	0	0	0	0	0	0	-0.129585	0	0	0	0	0	0	0	0	0	0	0	0	0	0	0	0	0	0	0	0	0	0	0	0	0	0	0	0	0	0.0754817	0	0	0	0
SGN-U223719	SGN-U321747	0	0	0	0	0	0	0	0	0	0	0	0	0	0	0	0	0	0	0	0	0	0	0	0	0	0	0	0	0	0	0	0	0	0	0	0	0	-0.0449355	0	0	0.0132568	0	0	0	0	0	0	0
SGN-U215188	SGN-U314607	0	0	0	0	0	0	0	0	0	0	0	0	0	0	0	0	0	0	0	-0.0535418	0	0	0	0	0	0	0	0	0	0	0	0	0	0	0	0	0	0	0	0	0	0	0	0	0	0	0	0
SGN-U215776	SGN-U313723	0	0	0	0	0	0	0	0	0	0	0	0	0	0	0	0	0	0	0	0	0	0	0	0	0	-0.114427	0	0	0	0	0	0	0	0	0	0	0	0	0	0	0	0	0	0	0	0	0	0
SGN-U213179	SGN-U312782	0.0447524	0	0	0	0	0	0	0	0	0	0	0	0	0	0	0	0	0	0	0	0	0	0	0	0	-0.000227212	0	0	0	0	0	0	0	0	0	0	0	0	0	0	0	0	0	0	0	0	0	0
SGN-U225854		0	0	0	0	0	0	0	0	0	0	0	0	0	0	0	0	0	0	0	0	0	0	0	0	0	0	0	0	0	0	0	0	0	0	0	0	0	0	0	0	0	0	0	0	0	0	0	0.0326979
SGN-U223571	SGN-U325508	0	0	0	0	0	0	0	0	0	0	0	0	0	0	0	0	0	0	0	0	0	0	0	0	0	0	0	0	0	0	0	0	0	0	0	0	0	0	0	0	0	0	0	0	0	0	0	0
SGN-U219643	SGN-U315780	0	0.0644282	0	0	0	-0.0880422	0	0	0	0	0	0	0	0	0	0	0	0.0765537	0	0	0	0	0	0	0	0	0	0	0	0	0	0	0	0	0	0	0	-0.199553	0	0	0	0	0	0	0	0	0	0
SGN-U217976	SGN-U320379	0	0	0	0	0	0	0	0	0	0	0	0	0	0	0	0	0	0	0	0	0	0	0	0	0	0	0	0	0	0	0	0	0	0	0	0	0	0	0	0	0	0	0	0	0	0	0	0
SGN-U218888	SGN-U320999	0	0	0	0	0	0	0	0	0	0	0	0	0	0	0	0	0	0	0	0	0	0	0	0	0	0	0	0	0	0	0	0	0	0	0	0	0	0	0	0	0	0	0	0	0	0	0	0
SGN-U212594	SGN-U312405	0	0	0	0	0	0	0	0	0	0	0	0	0	0	0	0	0	0	0	0	0	0	0	0	0	0	0	0	0	0	0	0	0	0	0	0	0	0	0	0	0	0	0	0	0	0	0	0
SGN-U231674	SGN-U326048	0	0	0	0	0	0	0	0	0	0	0	0	0	0	0	0	0	0	0	0	0	0	0	0	0	0	0	0	0	0	0	0	0	0	0	0	0	0	0	0	0	0	0	0	0	0	0	0
SGN-U215220		0	0	0	0	0	0	0	0	0	0	0	0	0	0	0	0	0	0	0	0	0	0	0	0	0	0	0	0	0	0	0	0	0	0	0	0	0	0	0	0	0	0	0	0	0	0	0	0
SGN-U221636	SGN-U319193	0	0	0	0	0	0	0	0	0	0	0	0	0	0	0	0	0	0	0	0	0	0	0	0	0	0	0	0	0	0	0	0	0	0	0	0	0	0	0	0	0	0	0	0	0	0	0	0
SGN-U213862	SGN-U314778	0	0	0	0	0	0	0	0	0	0	0.00671319	0	0	0	0	0	0	0	0	0	0	0	0	0	0	0	0	0	0	0	0	0	0	0	0	0	0	0	0	0	0	0	0	0	0	0	0	0
SGN-U217865	SGN-U319089	0	0	0	0	0	0	-0.0815201	0	0	0	0	0	0.239707	0	0	0	0	0	0	0	0	0	0	0	0	0	0	0	0	0	0.111164	0	-0.267343	0	0	0	0	0	0	0	-0.243528	0	0	0	0	0	0	0.445744
SGN-U231495		0	0	0	0	0	0	0	0	0	0	0	0	0	0	0	0	0	0	0	0	0	0	0	0	0	0	0	0	0	0	0	-0.06928	0	0	0	0	0	0	0	0	0	0	0	0	0	0	0	0
SGN-U216373	SGN-U317366	0	0	0	0	0	0	0	0	0	0	0	0	0	0	0	0	0	0	0	0	0	0	0	0	0	0	0	0	0	0	0	0	0	0	0	0	0	0	0	0	0	0	0	0	0	0	0	0
SGN-U214153	SGN-U314040	0	0	0	0	0	0	0	0	0	0	0	0	0	0	0	0	0	0	0	0	0	0	0	0	0	0	0	0	0	0	0	0	0	0	0	0	0	0	0	0	0	0	0	0	0	0	0	0
SGN-U217517	SGN-U317450	0	0	0	0	0	0	0	0	0	0	0	0	0	0	0	0	0	0	0	0	0	0	0	0	0	0	0	0	0	0	0	0	0	0	0	0	0	0	0	0	0	0	0	0	0	-0.0514181	0	0
SGN-U222842	SGN-U323153	0	0	0	0.073013	0	0	0	0	0	0	0	0	0	0	0	0	0	0	0	0	0	0	0	0	0	0	0	0	0	0	0	0	0	0	0	0	0	0	0	0	0	0	0	0	0	0	0	0
SGN-U214043	SGN-U314010	0	0	0	0	0	0	0	0	0	0	0	0	0	0	0	0	0	0	0	0	0	0	-0.0482422	0	0	0	0	0	0	0	0	0	0	0	0	0	0	0	0	0	0	0.093256	0	0	0	0	0	0
SGN-U220394	SGN-U321639	0	0	0	0	0	0	0.0365665	0	0	0	0	0	0	0	0	0	0	0	0	0	0	0	0	0	0	0	0	0	0	0	0	0	0	0	0	0	0	0	0	0	0	0	0	0	0	0	0	0
SGN-U217252	SGN-U317822	0.107845	0	0	0	0	0	0	0	0	0	0	0	0	0	0	0	0	0	0	0	0	0	0	0	0	0	0	0	0	0.0906321	0	0	0	-0.0320591	0	0	0	0	0	0	0	0	0	0	0	0	0	0
SGN-U214705	SGN-U313729	0	0	0	0	0	0	0	0	0	0	0	0	0	0	0	0	0	0	0	0	0	0	0	0	0	0	0	0	0	0	0	0.153999	0	0	0	0.00271438	0	0	0	0	0	0	0	0	0	0	0	0
SGN-U223109	SGN-U325454	0	0	0	0	0	0	0	0	0	0	0	0	0	0	0	0	0	0	0	0	0	0	0	0	0	0	0	0	0	0	0	0	0	0	0	0	0	0	0	0	0	0	0	0	0	0	0	0
SGN-U213158	SGN-U312863	0	0	0	0	0	0	0	0	0	0	0	0	0	0	0	0	0	0	0	0	0	0	0	0	0	0	0	0	0	0	0	0	0	0	0	0	0	0	0	0	0	0	0	0	0.021531	0	0.00460471	0
SGN-U218236	SGN-U318673	0	0	0	0	-0.0277152	0	0	0	0	0	0	0	0	0	0	0	0	0	0	0	0	0	0	0	0	0	0	0	0	0	0	0	0	0	0	0	0	0	0	0	0	0	0	0	0	0	0	0
SGN-U217119	SGN-U319390	0	0.490111	-0.027488	0	0	0	0	0	0	0	0	0	0	0	0	0	0	0	0	0	0	0	0	0	0	0	0	0	0	0	0	0	0	0	0	0	0	0	0	0	0	0	0	0	0	0	0	0
SGN-U214431	SGN-U314195	0	0	0	0	0	0	0	0	0	0	0	0	0	0	0	0	0	0	0	0	0	0	0	0	0	0	0	0	0	0	0	0	0	0	0	0	0	0	0	0	0	0	0	0	0	0	0	0
SGN-U215227	SGN-U315809	0	0	0	0	0	0	0	0	0	0	0	0	0	0	0	0	0	0	0	0	0	0	0	0	0	0	0	0	0	0	0	0	0	0	0	0	0	0	0	0	0.112072	0	0	0	0	0	0	0
SGN-U215564	SGN-U317187	0	0	0	0	0	0	0	0	0	0	0	0.0520298	0	0	0	0	0	0	0	0	0	0	0	0	0	0	0	0	0	0	0	0	0	0	0	0	0	0	0	0	0	0	0	0	0	0	0	0
SGN-U218839	SGN-U318636	0	0	0	0	0	0	0	0	0	0	0	0	0	0	0	0	0	0.167685	0	0	0	0.103317	0	0	0	0	0	0	0	0	0	0	0	0	0	0	0	0	0	0	0	0	0	0	0	0	0	0
SGN-U221070		0	0.158428	0	0	0	0	0	0	0	0	0	0	0	0	0	0	0	0	0	0	0	0	0	0	0	0	0	0	0	0	0	0	0	0	0	0	0	0	0	0	0	0	0	0	0	0	0	0
SGN-U219444	SGN-U320487	0	0	0	0	0	0	0	0	0	0	0	0	0	0	0	0	0	0	0	0	0	0	0	0	0	0	0	0	0	0	0	0	0	0	0	0	0	0	0	0	0	0	0	0	0	0	0	0
SGN-U225784	SGN-U329839	0	0	0	0	0	0	0	-0.0266671	0	0	0	0	0	0	0	0	0	0	0	0	0	0	0	0	0	0	0	0	0	0	0	0	0	0	0	0	0	0	0.0219912	0	0	0	0	0	0	0	0	0
SGN-U216342	SGN-U316334	0	0	0	0	0	0	0	0	0	0	0	0	0	0	0	0	0	0	0	0	0	0	0	0	0	0	0	0	0	0	0	0	0	0	0	0	0	0	0	0	0	0	0	0	0	0	0	0
SGN-U222551	SGN-U324856	0	0	0	0	0	0	0	0	0	0	0	0	0	0	0	0	0	0	0	0	0	0	0	0	0	0	0	0	0	0	0	0	0	0	0	0	0	0	0	0	0	0	0	0	0	0	0	0
SGN-U213164	SGN-U312754	0	0	0	0	0	0	-0.100957	0	0	0	0	0	0	0	0	0	0	0	0	0	0	0	0	0	0.1322	0	0	0	0	0	0	0	0	0	0	0	0	0	0	0	0	0	0	0	0	0	0	0
SGN-U214890	SGN-U315726	0	-0.0695302	0.0128539	0	0	0	0	0	0	0	0	0	0	0	0	0	0	0	0	0	0	0	0	0	0	0	0	0	0	0	0	0	0	0	0	0	0	0	0	0	0	0	0	0	0	0	0	0
SGN-U225669		0	0	0	0	0	0	0	0	0	0	0	0	0	0	0	0	0	0	0	0	0.202868	0	0	0	0	0	0	0	0	0	0	0	0	0	0	0	0	0	0	0	0	0	0.0497253	0	0	0	0	0
SGN-U225275	SGN-U321505	0	0	0	0	0	0	0	0	0	0	0	0	0	0	0	0	0	0	0	0	0	0	0	0	0	0	0	0	0	0	0	0	0	0	0	0	0	0	0	0	0	0	0	0	0.19682	0	0	0
SGN-U212736	SGN-U314384	0	0	0	0	0	0	0	0	0	0	0	0	0	0	0	0	0	0	0	0	0	0	0	0	0	0	0	0	0	0	0	0	0	0	0	0	0	0	0	0	0	0	0	0	0	0	0	0
SGN-U219270	SGN-U320992	0	0	0	0	0	0	0	0	0	0	0	0	0	0	0	0	0	0	0	0	0	0	0	0	0	0	0	0	0	0	0	0	0	0	0	0	0	0	0	0	0	0	0	0	0	0	0	0
SGN-U224995		0	0	0	0	0	0.0514565	0	0	0	0	0	0	0	0	0	0	0	0	0	0	0	0	0	0	0	0	0	0	0	0	0	0	0	0	0	0	0	0	0	0	0	0	0	0	0	0	0	0
SGN-U215786	SGN-U315959	0	0	0	0	0	0	0	0	0	0	0	0	0	0	0	0	0	0	0	0	0	0	-0.0528916	0	0	0	0	0	0	0	0	0	0	0	0	0	0	0	0	0	0	0	0	0	0	0	0	0
SGN-U225550	SGN-U319077	0	0	0	0	-0.00354099	0	0	0	0	0	0	0	0	0	0	0	0	0	0	0	0	0	0	0	0	0	0	0	0	0	0	0	0	0	0	0	0	-0.011078	0	0	0	0	0	0	0	0	0	0
SGN-U224378	SGN-U323111	0	0	0	0	0	0	0	0	0	0	0	0	0	0	0	0	0	0	0	0	0	0	0	0	0	0	0	0	0	0	0	0	0	0	0	0	0	0	0	0	0	0	0	0	0	0	0	0
SGN-U213335	SGN-U312840	0	0	0.195783	0	0	0	0	0	0	0	0	0	0	0	0	0	0	0	0	0	0	0	0	0	0	0	0	0	0	0	0	0	0	0	0	0	0	0	0	0	0	0	0	0	0	0	0	0
SGN-U223624	SGN-U325565	0	0	0	0	0	0	0	0	0	0	0	0	0	0	0	0	0	0	0	0	0	0	0	0	0	0	0	0	0	0	0	0	0	0	0	0	0	0	0	0	0	0	0	0	0	0	0	0
Y14810	Y14810	0	0	0	0	0	0	0	0	0	0	0	0	0	0	-0.050386	0	0	0	0	0	0	-0.0112163	0	0	0	0	0	0	0	0	0	0	0	0	0	0	0	0	0	0	0	0	0	0	0	0	0	0
SGN-U228261	SGN-U331538	0	0	0	0	0	0	0	0	0	0	0	0	0	0	0	0	0	0	0	0	0	0	0	0	0	0	0	0	0	0	0	0	0	0	0	0	0	0	0	0	0	0	0	0	0	0	0.0352005	0
SGN-U226444	SGN-U321157	0	0	0	0	0	0	0	0	0	0	0	0	0	0	0	0	0	0	0	0	0	0	0	0	0	-0.151382	0	0	0	0	0	0	0	0	0	0	0	0	0	0	0	0	0	0	0	-0.0201778	0	0
SGN-U219358		0	0	0	0	0	0	0	-0.199791	0	0	0	0	0	0	0	0	0	0	0	0	0	0	0	0	0	0	0	-0.289051	0	0	0	0	0	0	0	0	0	0	0	0	0	0	0	0	0	0	0	0
SGN-U217664	SGN-U319093	0	0	0	0	0	0	0	0	0	0	0	0	0	0	0	0	0	0	0	0	0	0	0	0	0	0	0	0	0	0	0	0	0	0	0	0	0	0	0	0	0	0	0	0	0	0	0	0
SGN-U221768	SGN-U322835	0	0	0	0	0	0	0	0	0	0	0	0	0	0	0	0	0	0	0	0	0	0	-0.0365891	0	0	0	0	0	0	0	0	0	0	0	0	0	0	0	0	0	0	0	0	0	0	0	0	0
SGN-U226970	SGN-U324582	0.00552227	0	0	0	0	0	0	0	0	0	0	0	0	0	0	0	0	0	0	0	0	0	0	0	0	0	0	0	0	0	0	0	0	0	0	0	0	0	0	0	0	0	0	0	0	0	0	0
SGN-U220861		0	0	0	0	0	0	0	0	0	0	0	0	0	0	0	0	0	0	0	-0.156647	-0.045564	0	0	0	0	0	0	0	0	0	0	0	0	0	0	0	0	0	0	0	0	0	0	0	0	-0.0868534	0	0
SGN-U215685	SGN-U316940	0.191958	0	0	0	0	0	0	0	0	0	0	0.0151255	0	0	0	0	0	0	0.0635687	0	0	0	0	0	0	0	0	0	0	0	0	0	0	0	0	0	0	0	0	0	0	0	0	0	0	0	0	0
SGN-U213918	SGN-U313852	0	0	0	0	0	0	0	0	0	0	0	0	0	0	0	0	0	0	0	0	0	0	0	0	0	0	0	0	0	0	0	0	0	0	0	0	0	0	0	0	0	0	0	0	0	0	0	0
SGN-U217685	SGN-U319691	0	0	0	0	0	0	0	0	0	0	0	0	0	0	0	0	0	0	0	0	0	0	0	0	0	0	0	0	0	0	0	0	0	0	0	0	0	0	0	0	0	0	0	0	0	0	0	0
SGN-U242333	SGN-U320592	0	0	0	0	0	0	0	0	0	0	0	0	0	0	0	0	0	0	0	0	0	0	0	0.134281	0	0	0.00925912	0	0	0	0	0	0	0	0	0	0	0	0	-0.333273	0	0	0	0.0201248	0	-0.0699286	0	0
SGN-U223036		0	0	0	0	0	0	0	0	0	0	0	0	0	0	0	0	0	0	0	0	0	0	0	0	0	0	0	0	0	0	0	0	0	0	0	0	0	0	0	0	0	0	0	0	0	0	0	0
SGN-U226869		0	0	0.0573642	0	0	0	0	0	0	0	0	0	0	0	0	0	0	0	0	0	0	0	0	0	0	0	0	0	0	0	0	0	0	0	0	0	0	0	0	0	0	0	0	0	0	0	0	0
SGN-U216265	SGN-U317604	0	0	0	0	0	0	0	0	0	0	0	0	0	0	0	0	0	0	0	0	0	0	0	0	0	0	0.0553797	0	0.0831758	0	0	0	0	0	0	0	0	0	0	0	0	0	0	0	0	0	0	0
SGN-U212800	SGN-U314498	0	0	0	0	0	0	0	0	0	0	0	0	0	0	0	0	0	0	0	0	0	0	0	0	0	0	0	0	0	0	0	0	0	0	0	0	0	0	0	0	0	0	0	0	0	0	0	0
SGN-U218271		0	0	0	0	0	0	0	0	0	0	0	0	0	0	0	0	0	0	0	0	0	0	0	0	0	0	0	0	0	0	0	0	0	0	0	0	0	0	0	0	0	0	0	0	0	0	0	0
SGN-U220612	SGN-U320695	0	0	0	0	0	0	0	0	0	0	0	0	0	0	0	0	0	0	0	0	0	0	0	0	0	0	0	0	0	0	0	0	0	0	0	0	0	0	0	0	0	0	0	0	0	0	0	0
SGN-U215657	SGN-U316876	0	0	0	0	0	0	0	0	0	0	0	0	0	0	0	0	0	0	0	0	0	0	0	0	0	0	0	0	0	0	0.0250979	0	0	0	0	0	0	0	0	0	0	0	0	0	0	-0.334925	0	0
SGN-U216505	SGN-U316323	0	0	0	0	0	0	0	0	0	0	0	0	0	0	0	0	0	0	0	0	0	0	0	0	0	0	0	0	0	0	0	0	0	0	0	0	0	0	0	0	0	0	0	0	0	0	0	0
SGN-U212765		0	0	0	0	0	0	0	0	0	0	0	0	0	0	0	0	0	0	0	0	0	0	0	0	0	0	0	0	0	0	0	0	0	0	0	0	0	-0.190443	0	0	0	0	0	0	0	0	0	0
SGN-U214169	SGN-U314089	0	0	0	0	0	0	0	0.100529	0	0	0	0	0	0	0	0	0	0	0	0	0	0	0	0	0	0	0	0	0	0	0	0	0	0.0244345	0	0	0	0	0	0	0	0	0	0	0	0	0	0
SGN-U227294	SGN-U323446	0	0	0	0	0	0	0	0	0	0	0	0	0	0	0	0	0	0	0	0	0	0	0	0	0	0	0	0	0	0	0	0	0	0	0	0	0	0	0	0	0.0355127	0	0	0	0	0	0	0
SGN-U224725	SGN-U327413	0	0	0	0	0	0	0	0	0	0	0	0	0	0	0	0	0	0	0.0139723	0	0	0	0	0	0	0	0	0	0	0	0	0	0	0	0	0	0	0	0	0	0	0	0	0	0	0	0	0
SGN-U219740	SGN-U321742	0	0	0	0	0	0	0	0	0	0	0	0	0	0	0	0	0	0	0	0	0	0	0	0	0	0	0	0	0	0	0	0	0	0	0	0	0	0	0	0	0	0	0	0	0	0	0	0
SGN-U213705	SGN-U313543	0	0	0	0	0	0	0	0	0	0	0	0	0	0	0	0	0	0	0	0	0	0	0	0	0	0	0	0	0	0	0	0	0	0	0	0	0	0	0	0	0	0	0	0	0	0	0	0
SGN-U224284	SGN-U320195	0	0	0	0	0	0	0	0	0	0	0	0	0	0	0	0	0	0	0	0	0	0	0	0	0	0	0	0	0	0	0	0	0	0	0	0	0	0	0	0	0	0	0	0.115827	0	0	0	0
SGN-U213088	SGN-U312830	0	0	0	0	0	0	0	0	0	0	0	0	0	0	0	0	0	0	0	0	0	0	0	0	0	0	0	0	0	0	0	0	0	0	0	0	0	0	0	0	0	0	0	0	0	0	0	0
SGN-U223606	SGN-U323768	0	0	0	0	0	0	0	0	0	0	0	0	0	0	0	0	0	0	0	0	0	0	0	0	0	0	0	0	0	0	0	0	0	0	0	0	0	0	0	0	0	0	0	0	0	0	0	0
SGN-U231088	SGN-U322168	0	0	0	0	0	0	0	0	0	0	0	0	0	0	0	0	0	0	-0.130999	0	0	0	0	0	0	0	0	0	0	0	0	0	0	0	0	0	0	0	0	0	0	0	0	0	0	0	0	0
SGN-U216923	SGN-U317275	0	0	0	0	0	0	0	0	0	0	0	0	0	0	0	0	0	0	0	0	0	0	0	0	0	0	0	0	0	0	0	0	0	0	0	0	0	0	0	0	0	0	0	0	0	0	0	0
SGN-U216659	SGN-U318017	0	0	0	0	0	0	0	0	0	0	0	0	0	0	0	0	0	0	0	0	0	0	0	0	0	0	0	0	0	0	0	0	0	0	0	0	0	0	0	0	0	0	0	0	0	0	0	0
SGN-U216051	SGN-U317389	0	0	0	0	0	0	0	0	0	0	0	0	0	0	0	0	0	0	0	0	0	0	0	0	0	0	0	0	0	0	0	0	0	0	0	0	0	0	0	0	0	0	0	0	0	0	0	0
SGN-U240992		0	0	0	0	0	0	0	0	0	0	0	0	0	0	0	0	0	0	0	0	0	0	0	0	0	0	0	0	0	0	0	0	0	0	0	0	0	0	0	0	0	0	0	0	0	0	0	0
SGN-U213698	SGN-U313698	0	0	0	0	0	0	0	0	0	0	0.0610745	0	0	0	0	0	0	0	0	0	0	0	0	0	0	0	0	0	0	0	0	0	0	0	0	0	0	0	0	0	0	0	0	0	0	0	0	0
SGN-U213536	SGN-U313302	0	0	0	0	0	0	-0.102426	0	0	0	0	-0.151762	0	0	0	0	0	0	0	0	0	0	0	0	0	0	0	0	0	0	0	0	0	0	0	0	0	0	0	0	0	0	0	0	0	0	0.0602781	0
SGN-U213089		0	0	0	0	0	0	0	0.0711562	0	0	0	0	0	0	0	0	0	0	0	0	0	0	0	0	0	0	0	0	0	0	0	0	0	0	0	0	0	0	0	0.0918904	0	0	0	0	0	0	0	0
SGN-U215057	SGN-U315252	0	0	0.129224	0	0	0	0	0	0	0	0	0	0	0	0	0	0	0	0	0	0	0.0788636	0	-0.0519988	0	0	0	0	0	0.000748191	0	0	0	0	0	0	0	0	0	0	0	0	0	0	0	0	0	0
SGN-U213909	SGN-U314670	0	0	0	0	0	0	0	0	0	0	0	-0.130589	0	0	0	0	0	0	0	0	0	0	0	0	0	0	0	0	0	0	0	0	0	0	0	0	0	0	0	0	0	0	0	0	0	0	0	0.0334532
SGN-U217078		0	0	0	0	0	0	0	0	0	0	0	0	0	0	0	0	0	0	0	0	0	0	0	0	0	0.153878	0	0	0	0	0	0	0	0	0	0	0	0	0	0	0	0	0.16513	0	0	0	0	0
SGN-U220492	SGN-U317660	0	0	0	0	0	0	0	0	0	0	0	0	0	0	0	0	0	0	0	0	0	0	0	0	0	0	0	0	0	0	0	0	0	0	0	0	0	0	0	0	0	0	0	0	0	0	0	0
SGN-U225925	SGN-U326109	0	0	0	0	0	0	0	0	0	0	0	0	0	0	0	0	0	0	0	0	0	0	0	0	0	0	0	0	0	0	0	0	0	0	0	0	0	0	0	0	0	0.139659	0	0	0	0	0	0
SGN-U227976	SGN-U327022	0	0	0	0	0	0	0	0	0	0	0	0	0	0	0	0	0	0	0	0	0	0	0	0	0	0	0	0	0	0	0	0	0	0	0	0	0	0	0	0	0	0	0	0	0	0	0	0
SGN-U216984		0	0	0	0	0	0	0	0	0	0	0	0	0	0	0	0	0	0	0	0	0	0	0	0	0	0	0	0	0	0	0	0	0	0	0	0	0	0	0	0.378059	0	0	0	0	0	0	0	0
SGN-U220207	SGN-U322034	0	0	0	0	0	0	0	0	0	0	0	0	0	0	0	0	0	0	0	0	-0.00389339	0	0	0	0	0	0	0	0	0	0	0	0	0	0	0	0	0	0	0	0	0	0	0	0	0	0	0
SGN-U219819	SGN-U317098	0	0	0	0	0	0	0	0	0	0	0	0	0	0	0	0	0	0	0	0	0	0	0	0	0	0	0	0	0	0	0	0	0	0	0	0	0	0	0	0	0	0	0	0	0	0	0	0
SGN-U217788	SGN-U319348	0	0	0	0	0	0	0	0	0	0	0	0	0	0	0	0	0	0	0	0	0	0	0	0	0	0	0	0	0	0	0	0.0061412	0	0	0	0	0	0	0	0	0	0	0	0	0	0	0	0
SGN-U214589	SGN-U314265	0	0	0	0	0	0	0	0	0	0	0	0	0	0	0	0.0442354	0	0	0	0	0	0	0	0	0	0	0	0	0	0	0	0	0	0	0	0	0	0	0	0	0	0	0	0	0	0	0	0
SGN-U217380	SGN-U319436	0	0	0	0	0	0	0	0	0	0	0	0	0	0	0	0	0	0	0	0	0	0	0	0	0	0	0	0	0	0	0	0	0.00874393	0	0	0	0	0	0	0	0	0	0	0	0	0	0.0237185	0
SGN-U213091	SGN-U312764	0	0	0	0	0	0	0	0	0	0	0	0	0	0	0	0	0	0	0	0	0	0	0	0	0	0	0.0674484	0	0	0	0	0	-0.136871	0	0	0	0	0	0	0	0	0	0	0	0	0	0	-0.0281779
SGN-U213550	SGN-U313413	0	0	0	0	0	0	0	0	0	0	0	0	0	0	0	0	0	0	0	-0.21586	0	0	0	0	0	0	0	-0.120264	0	0	0	0	0	0	0	0	0	0	0	0	0	0	0	0	0	0	0	0
SGN-U213872	SGN-U314730	0	0	0	0	0	0	0	0	0	0	0	0	0	0	0	0	0	0	0	0	0	0	0	0	0	0	0	0	0	0	0	0	0	0	0	0.0164588	0	0	0	0	0	0	0	0	0	0	0	0
SGN-U221324	SGN-U323398	0	0	0	0	0	0.298473	0	0	0	0	0	0	0	0	0	0	0	0	0	0	0	0	0	0	0	0	0	0	0	0	0	0	0.0494915	0	0	0	0	0	0	0	0	0	0	0	0	0	0	0
SGN-U213052	SGN-U312789	0	0	0	0	0	0	0	0	0	0	0	0	0	0	0	0	0	0	0	0	0	0	0	0	0	0	0	0	0	0	0	0	0	0	0	0	0	0.146968	0	0	0	0	0	0	0	0	0	0
SGN-U213833	SGN-U313496	0	0	0	0	0	0	0	0	0	0	0	-0.0347902	0	0.0134665	0	0	0	0.135597	0	0	0	0	0	0	0	0	0	0	0	0	0	0	0	0	0	0	0	0	0.0417444	0.0142677	0	0	0	0	0	0	0	0
SGN-U214388	SGN-U312444	0	0	0	0	0	0	0	0	0	0	0	0	0	0	0	0	0	0	0	0	0	0	0	0	0	0	0	0	0	0	0	0	0	0	0	0	0	0	0	0	0	0	0	0	0	0	0	0
SGN-U212889	SGN-U312547	0	0	0	0	0	0	0	-0.0745307	0	0	0	0	0	0	0	0	0	0	0	0	0	0	0	0	0	0	0	0	0	0	0	0	-0.282832	0	0	0	0	0	0	0	0	0	0	0	0	0	0	0
SGN-U217971	SGN-U318461	0	0	0	0	0	0	0	0	0	0	0	0	0	0	0	0	0	0	0	0	0	0	0	0	0	0	0	0	0	0	0	0	0	0	0	0	0	0	0	0	0	0.0731896	0	0	0	0	0	0.112868
SGN-U220628	SGN-U323280	0	0	0	0	0	0	0	-0.044364	0	0	0	0	0	0	0	0	0	0	0	0	0	0	0	0	0	0	-0.125801	0	0	0	-0.0393891	0	-0.00566829	0	0	0	0	0	0	0	0	0	0	0	0	0	-0.0186693	0
SGN-U216423	SGN-U317605	0	0	0	0	0	0	0	0	0	0	0	0	0	0	0	0	0	-0.0392021	0	0	0	0	0	0	0	0	0	0	0	0	0	0	0	0	0	0	0.0475081	0	0	0	0	0	0	0	0	0	0	0
SGN-U219529		0	0	0	0	0	0	0	0	0	0	0	0	0	0	0	0	0	0	0	0	0	0	0	0	0	0	0	0	0	0	0	0	0	0	0	0	0	0	0	0	0	0	0	0	0	0	0	0
SGN-U231146		0	0	0	0	0	0	0	0	0	0	0	0	0	0	0	0	0	0	0	0	0	0	0	0	0	0	0	0	0	0	0	0	0	0	0	0	0	0	0	0.14993	0	0	0	0	0	0	0	0
SGN-U221824	SGN-U312511	0	0	0	0	0	0	0	0	0	0	0	0	0	0	0	0	0	0.135879	0	0	0	0	0	0	0	0	0	0	0	0	0	0	0	0	0	0	0	0	0	0	0	0	0	0	0	0	0	0
SGN-U213865	SGN-U313951	0	0	0	0	0	-0.0880144	0	0	0	0	0	0	0	0	0	0	0	0	0	0	0	0	0	0	0	0	0	0	0	0	0	0	0	0	0	0	0	0	0	0	0	0	0	0	0	0	0	0
SGN-U216919	SGN-U317363	0	0	0	0	0	0	0	0	0	0	0	0	0	0	0	0	0	0	0	0	0	0	0	0	0	0	0	0	0	0	0	0	0	0	0	0	0	0	0	0	0	0	0	0	0	0	0	0
SGN-U218503		0.0726125	0	0	0	0	0	0	0	0	0	0	0	0	0	0	0	0	0	0	0	0	0	0	0.237952	0	0	0	0	0	0	0	0	0	0	0	0	0	0	0	0	0	0	0	0	0	0	0	0
SGN-U214377	SGN-U314989	0	0	0	0	0	0	0	0	0	0	0	0	0	0	0	0	0	0	0	0	0	0	0	0	0	0	-0.00937701	0	0	0	0	0	0	0	0	0	0	0	0	0	0	0	0	0	0	0	0	0
SGN-U213443	SGN-U312856	0	0	0	0	0	0	0	0	0	0	0	0	0	0	0	0	0	0	0	0	0	0	0	0	0	0	0	0	0	0	0	0	0	0	0	0	0	0	0	0	0	0	0	0	0	0	0	0
SGN-U221423	SGN-U323323	0	0	0	0	0	0	0	0	0	0	0	0	0	0	0	0	0	0	0	0	0	0	0	0	0	0	0	0	0	0	0	0	0	0	0	0	0	0	0	0	0	0	0	0	0	0	0	0
SGN-U221966	SGN-U320665	0	0	0	0	0	0	0	0	0	0	0	0	0	0	0	0	0	0	0	0	0	0	0	0	0	0	0	0	0	0	0	0.00753808	0	0	0	0	0	0	0	0	0	0	0	0	0	0	0	0
SGN-U219549	SGN-U320255	0	0	0	0	0	0	0	0	0	0	0	0	0	0	0	0	0	0	-0.0699214	0	0	0	0	0	0	0	0	0	0	0	0	0	0	0	0	0	0	0	0	0	0	0	0	0	0	0	0	0
SGN-U213923	SGN-U313182	0	0	0	0	0	0	0	0	0	0	0	0	0	0	0	0	0	0	0	0	0	0	0	0	0	0	0	0	0	0	0	0	0	0	0	0	0	0	0	0	0	0	0	0	0	0	0	0
SGN-U221257		0	0	0	0	0	0	0	0	0	0	0	0	0	0	0	0	0	-0.0702032	0	0	0	0	0	0	0	0.120395	0	0	0	0	0	0	0	0	0	0	0	0	0	0	0	0	0	0	0	0	0	0
SGN-U219217		0	0	0	0	0	0	0	-0.0208464	0	0	0	0	0	0	0	0	0	0	0	0	0	0	0	0	0	0	0	0	0	0	0	0	0	0	0	0	0	0	0	0	0	0	0	0	0	0	0	0
SGN-U213250	SGN-U312918	-0.0372199	0	0	0	0	0	0	0	0	0	0	0	0	0	0	0	0	0	0	0	0	-0.0759269	0	0	0	0	0	0	0	0	0	0	0	0	0	0	0	0	0	0	0	0	0	0	0	0	0	0
SGN-U213982	SGN-U313967	0	0	0	0	0	0	0	0	0	0	0	0	0	0	0	0	0	0	0	0	0	0	0	0	0	0	0	0	0	0	0	0	0	0	0	0	0	0	0	0	0	0	0	0	0	0	0	0
SGN-U217471	SGN-U318405	0	0	0	0	0	0	0	0	0	0	0	0	0	0	0	0	0	0	0	0	0	0	0	0	0	0	0	0	0	0	0	0	0	0	0	0	0	0	0	0	0	0	0	0	0	0	0	0
SGN-U217465	SGN-U319104	0	0	0	0	0	0	0	0	0	0	0	0	0	0	0	0	0	0	0	0	0	0	0	0	0	0	0	0	0	0	0	0	0	0	0	0	0	0	0	0	0	0	0	0	0	0	0	0
SGN-U217002	SGN-U318146	0	0	0	0	0	0	0	0	0	0	0	0	0	0	0	0	0	0	0	0	0	0	0	0	0	0	0	0	0	0	0	0	0	0	0	0	0	0	0	0	0	0	0	0	0	0	0	0
SGN-U218315	SGN-U320077	0	0	0	0	0	0	0	0	0	0	0	0	0	0.0521421	0	0	0	0	-0.187609	0	0	0	0	0	0	0	0	0	0	0	0	0	0	0	0	0	0	0	0	0	0	0	0	0	0	0	0	0
SGN-U225757		0	0	0	0	0	0	0	0	0	0	0	0	0	0	0	0	0	0	0	0	0	0	0	0	0	0	0	0	0	0	0	0	0	0	0	-0.130977	0	0	0	0	0	0	0	0	0	0	0	0
SGN-U227718	SGN-U327266	0	0	0	0	0	0	0	0	0	0	0	0	0	0	0	0	0	0	0	0	0	0	0	0	0	0	0	0	0	0	0	0	0	0	0.262607	0	0	0	0	0	0	0	0	0	0	0	0	0
SGN-U241745		0	0	0	0	0	0	0	0	0	0	0	0	0	0.0489381	0	0	0	0	0	0	0	0	0	0	0	0	0	0	0	0	0	0	0	0	0	0	0	0	0	0	0	0	0	0	0	0	0	0
SGN-U225060	SGN-U326690	0	0	0	0	0	0	0	0	0.0464153	0	0	0	0	0	0	0	0	0	0	0	0	0	0	0	0	0	0	0	0	0	0	0	0	0	0	0	0	0	0	0	0	0	0	0	0	0	0	0
SGN-U217869		0	0	0	0	0	0	0	0	0	0	0	0	0	0	0	0	0	0	0	0	0	0	0	0	0	0	0	0	0	0	0	0	0	0	0	0	0	0	0	0	0	0	0	0	0	0	0	0
SGN-U221973	SGN-U321727	0	0	0	0	0	0	0	0	0	0	0	0	0	0	0	0	0	0	0	0	0	0	0	0	0	0	0	0	0	0	0	0	0	0	0	0	0	0	0	0	0	0	0	0	0	0	0	0
SGN-U225154		0	0	0	0	0	0	0	0	0	0	0	0	0	0	0	0	0	0	0	0	0	0	0	0	0	0	0	0	0	0	0	0	0	0	0	0	0	0	0	0	0	0	0	0.00832155	0	0	0	0
SGN-U217455	SGN-U318873	0	0	0	0	0	0	0	-0.0725556	0	0	0	0	0	0	0	0	0	0	0	0	0	0	0	0	0	0	0	0	0	0	0	0	0	-0.0470747	0	0	0	0	0	0	0	0	0	0	0	0	0	0
SGN-U214015	SGN-U314235	0	0	-0.0543287	0	0	0	0	0	0	0	0	0	-0.0402023	0	0	0	0	0	0	0	0	0	0	0	0	0	0	0	0	0	0	0	0	0	0	0	0	0	0	0	0	0	0	0	0	0	0	0
SGN-U216664	SGN-U317046	0	0	0	0	0	0	0	-0.0097859	0	0	0	0	0	0	0	0	0	0	0	0	0	0	0	0	0	0	0	0	0	0	0	0	0	0	0	0	0	0	0	0	0	0	0	0	0	0	0	0
SGN-U218631		0	0	0	0	0	0	0	0	0	0	0	0	0	0	0	0	0	0	0	0	0	0	0	0	0	0	0	0	0	0	0	0	0	0	0	0	0	0	0	0	0	0	0	0	0	0	0	0
SGN-U214098	SGN-U315137	0	0	0	0	0	0	0	0	0	-0.0248087	0	0	0	0	0	0	0	0	0	0	0	0	0	0	0	0	0	0	0	0	0	0	0	0	0	0	0	0	0	0	0	0	0	0	0.0265764	0	0	0
SGN-U220161	SGN-U315842	0	0	0	0	0	0	0	0	0	0	0	0	0	0	0	0	0	0	0	0	0	0	0	0	-0.124932	0.129154	0	0	0	0	0	0	0	0	0	0	0	0	0	0.10451	0	0	0	0	0	0	0	0
SGN-U213218	SGN-U313171	0	0	0	0	0	0	0	0	0	0	0	0	0	0	0	0	0	0	0	0	0	0	0	0	0	0	0	0	0	0	0	0	0	0	0	0	0	0	0	0	0	0	0	0	0	0	0	0
SGN-U227559	SGN-U327149	0	0	0	0	0	0	0	-0.10806	0	0	0	0	0	0	0	0	0	0	0	0	0	0	0	0	0	0	0	0	0	0	0	0	0	0	0	0	0	0	0	0	0	0	0	0	0.117096	0	-0.126207	0
SGN-U219304		0	0	0	0	0	0	0	0	0	0	0	0	0	0	0	0	0	0	0	0	0	0	0	0	0	0.00614007	0	0	0	0	0	0	0	0	0	0	0	0	0	0	0	0	0	0	0	0	0	0
SGN-U223396		0	0	0	0	0	0	0	0	0	0	0	0	0	0	0	0	0	0	0	0	0	0	0	0	0	0	0	0	0	0	0	0	0	0	0	0	0	0	0	0	0	0	0	0	0	0	0	0
SGN-U221669	SGN-U323705	0	0	0	0	0	0	0	0	0	0	0	0	0	0	0	0	0	0	0	0	0	0	0	0	0	0	0	0	0	0	0	0	0	0	0	0	0	-0.0955121	0	0	0	0	0	0	0	0	0	0
SGN-U217931	SGN-U320118	0	0	0	0	0	0	0	0	0	0	0	0	0	0	0	0	0	0	0	0	0	0	0	0	0	0	0	0	0	0	-0.155144	0	0	0	0	0	0	0	0	0	0	0	0	0	0	0	0	0
SGN-U216446	SGN-U318335	0	0	0	0	0	0	0	0	0	0	0	0	0	0	0	0	0	0	0	0	0	0	0	0	0	0	0	0	0	0	0	0	0	0	0	0	0	0	0	0	0	0	0	0	0	0	0	0
SGN-U221041	SGN-U322362	0	0	0	0	0	0	0	0	0	0	-0.0849066	0	0	0	0	0	0	0	0	0	0	0	0	0	0	0	0	0	0	0	0	0	0	0	0	0	0	0	0	0	0	0	0	0	0	0	0	0
SGN-U216022	SGN-U317071	0	0	0	0	0	0	0	0	0	0	0	0	0	0	0	0	0	0	0	0	0	0	0	0	0	0	0	0	0	0	0	0	0	0	0	0	0	0	0	0	0	0	0	0	0	0	0	0
SGN-U219337	SGN-U318382	0	0	0	0	0	0	0	0	0	0	0	0	0	0	0.0547325	0	0	0	0	0	0	0	0	0	0	0	0	0	0	0	0	0	0	0	0	0	0	0	0	0	0	0	0	0	0	0	0	0
SGN-U219638	SGN-U319718	0	0	0	0	0	0	0	0.067686	0	0	0	0	0	0	0	0	0	0	0	0	0.0597363	0	-0.101353	0	0	0	0	0	0	0	0	0	0	0	0	0	0	0	-0.0151398	0	0	0	0	0	0	0	0	0
SGN-U219153	SGN-U319248	0	-0.118231	0	0	0	0	0	0	0	0	0	0	0	0	0	0	0	0	0	0	0	0	0	0	0	0	0	0	0	0	0	0	0	0	0	0	0	0	0	0	0	0	0	0	0	0	0	0
SGN-U218409	SGN-U319990	0	0	0	0	0	0	0	0	0	0	0	0	0	0	0	0	0	-0.0565804	0	0	0	0	0	0	0	0	0	0	0	0	0	0	0	0	0	0	0	0	0	0	0	0	0	0	0	0	0	0
SGN-U223443		0	0	0	0	0	0	0	0	0	0	0	0	0	0	0	0	0	0	0	0	0	0	0	0.054431	0	0	0	0	0	0	0	0	0	0	0	0	0	0	0	0	0	0	0	0	0	0	0	0
SGN-U236488	SGN-U316115	0	0	0	0	0	0	0	0	0	0	0	0	0	0	0	0	0	0.144896	0	0	0	0	0	0	0	0	0	0	0	0	0	0	0	0	0	0	0	0	0	0	0	0	0	0	0	0	0	0
SGN-U218261	SGN-U318651	0	0	0.271071	0	0	0	0	0	0	0	0	0	0	0	0	0	0	0	0	0	0	0	0.00818848	0	0	0	0	0	0	0	0	0	0	0	0	0	0	0	0	0	-0.176657	0	0	0	0	0	0	0
SGN-U214473	SGN-U314515	0	0	0	0	0	0	0	0	0	0	0	0	0	0	0	0	0	0	0	0	0	0	0	0	0	0	0	0	0	0	0	0	0	0	0.0688959	0	0	0	0	0.135625	0	0	0	0	0	0	0	0
SGN-U217129	SGN-U317152	0	0	0	0	0	0	0	0	0	0	0	0	0	0	0	0	0	0	0	0	0	0	0	0	0	0	0	0	0	0	0	0	0	0	0	0	0	0	0	0	0	0	0	0	0	0	0	0
SGN-U219265	SGN-U321161	0	0	0	0	0	0	0	0	0	0	0	0	0	0	0	0	0	0.161143	0	0	0	0	0	0	0	0	0	0	0	0	0	0	0	0	0	0	0	0	0	0	0	0	0	0	0	0	0	0
SGN-U216293	SGN-U317589	0	0	0	0	0	0	0	0	0	0	0	0	0	0	0	0	0	0	0	0	0	0	0	0	0	0	0	0	0	0	0	0	0	0	0	0	0	0	0	0	0	0	0	0	0	0	0	0
SGN-U225517	SGN-U314688	0	0	0	0	0	0	0	0	0	0	0	0	0	0	0	0	0	0	0	0	0	0	0	0	0	0	0	0	0	0	0	0	0	0	0	0	0	0	0	0	0	0	0	0	0	0	0	0
SGN-U215171	SGN-U315305	0	0	0	0	0	0	0	0	0	0	0	0	0	0	0	0	0	0	0	0	0	0	0	0	0	0	0	0	0	0	0	0	0	0	0	0	0	0	0	0	0	0	0	0	0	0	0	0
SGN-U217672	SGN-U319361	0	0	0	0	0	0	0	0	0	0	0	0	0.0503399	0	0	0	0	0	0	0	0	0	0	0	0	0	0	0	0	0	0	-0.0268444	0	0	0	0	0	0	0	0	0	0	0	0	0	0	0	0
SGN-U227809	SGN-U329258	0	0	0	0	0	0	0	0	0	0	0	0	0	0	0	0	0	0	0	0	0	0	0	0	0.239829	0	0	0	0	0	0	0	0	0	0	0	0	0	0	0	0	0	0	0	0	0	0	0
SGN-U216880	SGN-U318917	0	0	0	0	0	0	0	0	0	0	0	0	0	0	0	0	0	0	0	0	0	0	0	0	0	0	0	0	0	0	0	0	0	0	0	-0.042183	0	0	0	0	0	0	0	0	0	0	0	0
SGN-U218553	SGN-U320030	0	0	0	0	0	0	0	0	0	0	0	0	0	0	0	0	0	0	0	0	0	0	0	0	0	0	0	0	0	0	0	0	0	0	0	0	0	0	0	0	0	0.0960065	0	0	0	0	0	0
SGN-U234985	SGN-U326323	0	0	0	0	0	0	0	0	0	0	0	0	0	0	0	0	0.286044	0	0	0	0	0	0	0	0	0	0	0	0	0	0	0	0	0	0	0	0	0	0	0	0	0	0	0	0	0	0	0
SGN-U222249	SGN-U322343	0	0	0	0	0	0	0	-0.0610159	0	0	0	0	0	0	0	0	0	0	0	0	0	0	0	0	0	0	0	0	0	0	0	0	0	0	0	0	0	0	0	0	0	0	0	0	0	0	0	0
SGN-U218453	SGN-U315238	0	0	0	0	0	0	0	0	0	0	0	0	0	0	0	0	0	0	0	0	0	0	0	0	0	0	0	0	0	0	0	0	0	0	0	0	0	0	0	0	0	0	0	0	0	0	0	0
SGN-U213236	SGN-U313001	0	0	0	0	0	0	0	0	0	0	0	0	0	0	0	0	0	0	0	0	0	0	0	0	0	0	0	0	0	0	0	0	0	0	0	0	0	0	0	0	0	0	0	0	0	0	0	0
SGN-U217942	SGN-U316222	0	0	0	0	0	0	0	0	0	0	-0.0432266	0	0	0	0	0	0	0	0	0	0	0	0	0	0	0	0	0	0	0	0	0	0	-0.231262	0	0	0	0	0	0	0	0	0	0	0	0	0	0
SGN-U219644	SGN-U322372	0	0	0	0	0	0	0	0	0	0	0	0	0.00374416	0	0	0	0	0	0	0	0	0	0	0	0	0	0	0	0	0	0	0	0	0	0	0	0	0	0	0	0	0	0	0	0	0	0	0
SGN-U233513	SGN-U335607	0	0	0	0	0	0	0	0	0	0	0	0	0	0	0	0	0	0	0	0	0	-0.292126	0	0	0	0	0	0	0	0	0	0	0	0	0	0	0	0	0	0	0	0	0	0	0	0	0	0
SGN-U232238	SGN-U333748	0	0	0	0	0	0	0	0	0	0	0	0	0	0	0	0	0	0	-0.231658	0	0	0	0	0	0	0	0	0	0	0	0	0	0	-0.0117461	0	0	0	0	0	0	0	0	0	0	0.0730967	0	0	0
SGN-U218033	SGN-U319640	0	0	0	0	0	0	0	0	0	0	0	0	0	0	0	0.0561743	0	0	0	0	0	0	0	0	0	0	0	0	0	0	0	0	0	0	0	0	0	0	0	0	0	0	0	0	0	0	0	0
SGN-U224729		0	0	0	0	0	0	0	0	0	0	0	0	0	0	0	0	0	0	0	0	0	0	0	0	0	0	0	0	0	0	0	0	0	0	0	0	0	0	0	0	0	0	0	0	0	0	0	0
SGN-U214288	SGN-U314161	0	0	0	-0.0664221	0	0	0	0	0	0	0	0	0	0	0	0	0	0	0	0	0	0	0	0	0	0	0	0	0	0	0	0	0	0	0	0	0	0	0	0	0	0	0	0	0	0	-0.120774	0
SGN-U225529	SGN-U314252	0	0	0	0	0	0	0	0	0	0	0	0	-0.0227314	0	0	0	0	0	0	0	0	0	0	0	0	0	0	0	0	0	0	0	0	0	0	0	0	0	0	0	0	0	0	0	0	0	0	0
SGN-U240896	SGN-U332289	0	0	0	0	0	0	0	0	0	0	0	0	0	0	0	0	0	0	0	0	0	-0.0524253	0	0	0	0	0	0	0	0	0	0	0	0	0	0	0	0	0	0	0	0	0	0	0	0	0	0
SGN-U219663	SGN-U321140	0	0	0	0	-0.0492241	0	0	0	0	0	0	0	0	0	0	0	0	0	0	0	0	0	0	0	0	0	-0.125246	0	0	0	0	0	0	0	0	0	0	0	0	0	0	0	0	0	0	0	0	0
SGN-U215649	SGN-U317307	0	0	0	0	-0.010566	0	-0.216725	0	0	0	0	0	0	0	0	0	0	0	0	0	0	0	0	0	0	0	0	0	0	0	0	0	0	0	0	0	0	0	0	0.410444	0	0	0	0	0	0	0	0
SGN-U214741	SGN-U316086	0	0	0	0	0	0	0	0	0	0	0	0	0	0	0	0	0	0	0	0	0	0	0	0	0	0	0	0	0	0	0	0	0	0	0	0	0	0	0	0	0.00649281	0	0	0	0	0	0	0
SGN-U220691	SGN-U322694	0	0	0	0	0	0	0	0	0	0.0503441	0	0	0	0	0.0775136	0	0	0	0	0	0	0	0	0	0	0	0	0	0	0	0	0	0	0	0	0	0	0	0	0	0	0	0	0	0	0	0	0
SGN-U226505		0	0	0	0	0	0	0	0	0	0	0	0	0	0.000999058	0	0	0	0	0	0	0	0	0	0	0	0.1461	-0.0887651	0	0	0	0	0	0	0	0	0	0	0	0	0	0	0	0	0	0	0	0	0
SGN-U221376	SGN-U323986	0	0	0	0	0	0	0	0	0	0	0	0	0	0	0	-0.130448	0	0	0	0	0	0	0	0	0	0	0	0	0	0	0	0	0	0	0	0	0	0	0	0	0	0	0	0	0	0	0	0
SGN-U220979	SGN-U326114	0	0	0	0	0	0	0	0	0	0	0	0	0	0	0	0	0	0	0	0	0	0	0	0	0	0	0	0	0	0	0	0	0	0	0	0	0	0	0	0	0	0	0	0	0	0	0	0
SGN-U216535	SGN-U317875	0	0	0	0	0	0	0	0	0	0	0	0	0	0	0	0	0	0	0	0	0	0	0	0	0	0	0	0	0	0	0	0	0	0	0	0	0	0	0	0	0	0	0	0	0	0	0	0
SGN-U224099	SGN-U325478	0	0.0915024	-0.0851751	0	0	0	0	0	0	0	0	0	0	0	0	0	0	0	0	0	0.0469626	0	0	0	0.129242	0	0	0	0	0	0	0	0	0	0	0	0	0	0	0	0	0	0	0	0	0	0	0
SGN-U218381	SGN-U320564	0	0	0	0	0	0	0	0	0	0	0	0	0	0	0	0	0	0	0	0	0	0	0	0	0	0	0	0	0	0	0	0	0	0	0.046452	0.0395263	0	0	0	-0.0482004	0	0	0	0	0	0	0	0
SGN-U224348	SGN-U326468	0	0	0	0	0	0	0	0	0	0	0	0	0	0	0	0	0	0	0	0	0	0	0	0	0	0	0	0	0	0	0	0	-0.0167775	0	0	0	0	0	0	0	0	0	0	0	0	0	0	0
SGN-U221157		0	0	0	0	0	0	0	0	0	0	0	0	0	0	0	0	0	0	0	0	0	0	0	-0.296019	0	0	0	0	0	0	0	0	0	0	0	0	0	0	0	0	0	0	0	0	0	0	0	0
SGN-U216716	SGN-U314771	0	0	0	0	0	0	0	0.101466	0	0	0	0	0	0	0	0	0	0	0	0.0766053	0	0	0	0	0	0	0	0	0	0	0	0	0	0	0	0	0	0	0	0	0	0	0	0	0	0	0	0
SGN-U213604	SGN-U313426	0	0	0	0	0	0	0	0	0	0	0	0	0	0	0	0.0610487	0	0	0	0	0	0	0	0	0	0	0	0	0	0	0	0	0	0	0.0974347	0	0	0	0	0	0	0	0	0	0	0	0	0
SGN-U219914	SGN-U322500	0	0	0	0	0	0.0995444	0	0	0	0	0	0	0	0	0	0	0	0	0.0188002	0	0	0	0	0	0	0	0	0	0	0	0	0	0	0	0	0	0	0	0	0	0	0	0	0	0	0	0	0
SGN-U220780	SGN-U321611	0	0	0	0	-0.0657058	0	0	0	0	0	0	0	0	0	0	0	0	0	0	0	0	0	0	0	0	0	0	0	0	0	0	0	0	0	0	0	0	0	0	0	0	0	0	0	0	0	0	-0.0336174
SGN-U217947	SGN-U318897	0	0	0	0	0	0	0	0	0	0	0	0	0	0	0	0	0.0203242	0	0	0	0	0	0	0	0	0	0	0	0.017749	0	0	0	0	0	0	0	0	0	0	0	0	0	0	0	0	0	0	0
SGN-U221261	SGN-U323448	0	0	0	0	0	0	0	0	0	0	0	0	0	0	0	0	0	0	0	0	0	0	0	0	0	0	0	0	0	0	0	0	0	0.200321	0	0	0	0	0	0	0	0	0	0	0	0	0	0
SGN-U215695	SGN-U316851	-0.0357085	0	0	0	0	0	0	0.188233	0	0	0	0	0	0	0	0	0	0	0	0	0	0	0	0	0	0	0	0	0	0	0	0	0	0	0	0	0	0	0	0	0	0	0	0	0	0	0	0
SGN-U221265	SGN-U322609	0	0	0	0	0	0	0	0	0	0	0	0	0	0	0	0	0	0	-0.163495	0	0	0	0	0	0	0	0	0	0	0	0	0	0	-0.15951	0	0	0	0	0	0	0	0	0	0	0	0	0	0
SGN-U220206	SGN-U322797	0	0	0	0	0	0	0	0	0	0	0	0	0	0	0	0	0	0	0.0530467	0	0	0	0	0	0	0	0	0	0	-0.0145623	0	0	0	0	0	0	0	0	0	0	0	0	0	0	0	0	0	-0.206138
SGN-U225558	SGN-U328424	0	0	0	-0.0326008	0	0	0	0	0	0	0	0	0	0	0	0	0	0	0	0	0	0	0	0	0	0	0	0	0.0814288	0	0	0	0	0	0	0	0	0	0	0	0	0	0	0	0	0	0	0
SGN-U212893	SGN-U312672	0	0	0	0	0	0	0	-0.0579793	0.0132514	0	0	0	0	0	0	0	0	0	0	0	0	0	0	0	0	0	0	0	0	0	0	0	0	0	0	0	0	0	0	0	0	0	0	-0.0337306	0	0	0	0
SGN-U219825	SGN-U321518	0	0	0	0	0	0	0	0	0	0	0	0	0	0	0	0	0	0	0	-0.134984	0	0	0	0	0	0	0	0	0	0	0	0	0	0	0	0	0	0	0	0	0	0	0	0	0	0	0	0
SGN-U242803		0	0	0	0	0	0	0	0	0	0	0	0	0	0	0	0	0	0	0	0	0	0	0	0	0	0	0	0	0	0	0	0	0	0	0	0	0	0	0	0	0	0	0	0	0	0	0	0
SGN-U221528	SGN-U324319	0	0	0	0	0	0	0	0	0	0	0	0	0	0	0	0	0	0	0	0	0	0	0	0	0	0	0	0	-0.0257624	0	0	0	0	0	0	0	0	0	0	0	0	0	0	0	0	0	0	0
SGN-U219368		0	0	0	0	0	0	0	0	0	0	0	0	0	0	0	0	0	0	0	0	0	0	0	0	0	0	0	0	0	0	0	0	0	0	0	0	0	0	0	0	0	0	0	0	0	0	0	0
SGN-U228980		0	0	0	0	0	0	0	0	0	0	0	0	0	0	0	0	0	0	0	0	0	0	0	0	0	0	0	0	0	0	0	0	0	0	0	0	0	0	0	0	0	0	0	0	0	0	0	0
SGN-U219098	SGN-U320411	0	0	0	0	0	0	0	0	0	0	0	0	0	0	0	0	0	0	0	0	0	0	0	0	0	0	0	0	0	0	0	0	0	0	0	0	0	0	0	0	0	0	0	0	0	0	0	0
SGN-U218052	SGN-U319380	0	0	0	0	0	0	0	0	0	0	0	0	0	0	0	0	0	0	0	0	0	0	0	0	0	0	0	0	0	0	0	0	0	0	0	0	0	0	0	0	0	0	0	0	0	0	0	0
SGN-U219846	SGN-U321537	0	0	0	0	0	0	0	0	0	0	0	0	0	0	0	0	0	0	0	0	0	0	0	0	0	0	0	0	0	0	0	0	0	0	0	0	0	0	0	0	0	0	0	0	0	0	0	0
SGN-U220104	SGN-U322799	0	0	0	0	0	0	0	0	0	0	0	0	0	0	0	0	0	0	0	0	0	0	0	0	0	0	0.0418069	0	0	0	0	0	0	0	0	0	0	0	0	0	0	0	0	0	0	0	0	0
SGN-U214313	SGN-U314022	0	0	0	0	0	0	0	0	0	0	0	0	0	0	0	0	0	0	0	0	0	0	0	0	0	0	0	0	0	0	0	-0.0979897	0	0	0	0	0	0	0	0	0	0	0	0	0	0	0	0
SGN-U212911	SGN-U312399	0	0	0	0	0	0	0	0	0	0	0	0	0	0	0	0	0	0	0	0	0	0	0	0	0	0	0	0	0	0	0	0	0	0.101548	0	0	0	0	0	0	0	0	0	0	0	0	0	0
SGN-U227600	SGN-U324139	0	0	0	0	0	0	0	0	0	0	0	0	0	0	0	0	0	0	0	0	0	0	0	0	0	0	0	0	0	0	0	0	0	0	0	0	0	0	0	0	0	0	0	0	0	0	0	0
SGN-U225014	SGN-U327436	0	0	0	0	0	0	0	0	0	0	0	0	0	0	0	0	0	0	0	0	0	0	0	0	0	0	0	0	0	0	0	0	0	0	0	0	0	0	0	0	0	0	0	0	0	0	0	0
SGN-U215410	SGN-U316087	0	0	0	0	0	0	0	0	0.0308536	0	0	0	0	0	-0.0133291	0	0	0	0	0	0	0	0	0	0	-0.0885322	0	0	0	0	0	0	0	0	0	0	0	0	0	0	0	0	0	0	0	0	0	0
SGN-U231032		0	0	-0.0977808	0	0	0	0	0	0	0	0	0	0	0	0	0	0	0	0	0	0	0	0	0	0	0	0	0	0	0	0	0	0.0625239	0	0	0	0	0	0	0	0	0	0	0	0	0	0	0
SGN-U217321	SGN-U318156	0	0	0	0	0	0	0	0	0	0	0	0	0	0	0	0	0	0	0	0	0	0	0	0	0	0	0	0	0	0	0	0	0	0	0	0	0	0	0	0	0	0	0	0	0	0	0	0
SGN-U212654	SGN-U312630	0	0	0	0	0	0	0	0	0	0	0	0	0	0.0320073	0	0	0	0	0	0	0	0	0	0	0	0	0	0	0	0	0	0	0	0	0	0	0	0	0	0	0	0	0	0	0	0	0	0
SGN-U214719	SGN-U316033	0	0	0	0	0	0	0	0	0	0	0	0	0	0	0	0	0	0	0	0	0	0	0	0	0	0	0	0	0	0	0	0	0	0	0	0	0	0	0	0	0	0	-0.362218	0	0	0	0	0
SGN-U218774	SGN-U318627	0	0	0	0	0	0	0	0	0	0	-0.0575789	0	0	0	0	0	0	0	0	0	0	0	0	0	0	0	0	0	0	0	0	0	0	0	0	0	0	0	0	0	0	0	0	0	0	0	0	0
SGN-U227393	SGN-U330088	0	0	0	0	0	0	-0.0450952	0	0	0	0	0	0	0	0	0	0	0	0	0	0	0	0	0	0	0	0	0	0	0	0	0	0	0	0	0	0	0	0	0	0	0	0	0	0	0	0	0
SGN-U216531	SGN-U318717	0	0	0	0	0	0	0	0	0	0	0	0	0	0	0	0	0	0.051374	0	0	0	0	0	0	0	0	0	0	0	0	0	0	0	0	0	0	0	0	0	0	0	0	0	0	0	0	0	0
SGN-U217203	SGN-U318993	0	0	0	0	0	0	0	0	0	0	0	0	0	0	0	0	0	0	0.00245095	0	0	0	0	0	-0.00600279	0	0	0	0	0	0	0	0	0	0	0	0.209693	0	0	0	0	0	0	0	0	0	0	0
SGN-U217195	SGN-U318544	0	0	0	0	0	0	0	0	0	0	0	0	0	0	0	0	0	0	0	0	0	0	0	0	0	0	0	0	0	0	0	0	0	0	0	0	0	0	0	0	0	0	0	0	0	0	0	0
SGN-U216076	SGN-U317094	0	0	0	0	0	0	0	0	0	0	0	0	0	0	0	0	0	0	0	0	0	0	0	0	0	0	0	0	0	0	0	0	0	0	0	0	0	0	0	0	0	0	0	0	0	0	0	0
SGN-U217548		0	0	0	0	0	0	0	0	0	0	0	0	0	0	0	0	0	0	0	0	0.0303714	0	0	0	0	0	0	0	0	0	0	0	0	0	0	0	0	0	0	0	0	0	0	0	0	0	0	0
SGN-U216101	SGN-U317400	0	0	0	0	0	0	0	0	0	0	0	0	0	0	0	0	-0.0416735	0	0	0	0	0	0	0	0	0	0	0	0	0	0	0	0	0	0	0	0	0	0	0	0	0	0	0	0	0	0	0
SGN-U215673	SGN-U317302	0	0	0	0	0	0	0	0	0	0	0	0	0	0	0	0	0	0	0	0	0	0	0	0	0	0	0	0	0	0	0	0	0	0	0	0	0	0	0	0	0	0	0	0	0	0	0	0
SGN-U215342	SGN-U315207	0	0	0	0	0	0	0	0	0	0	0	0	0	0	0	0	0	0	0	0	0	0	0	0	0	0	0	0	0	0	0	0	0	0	0	0	0	0	0	0	0	0	0	0	0	0	0	0.460053
SGN-U214298	SGN-U315127	0	0	0	0	0	0	0	0	0	0	-0.0978783	0	0	0	0	0	0	0	0	0	0	0	0	0	-0.0745374	0	0	0	0	0	0	0	0	0	0	0	0	0	0	0	0	0	0	0	0	0	0	-0.0109198
SGN-U217077	SGN-U320958	0	0	0	0	0	0	0	0	0	0	0	0	0	0	0	0	0	0	0	0	0	0	0	0	0	0	0	0	0	0	0	0	0	0	0	0	0	0	0	0	0	0	0	0	0	0	0	0
SGN-U212578	SGN-U312516	0	0	0	0	0	0	0	0	0	0	0	0	0	0	0	0	0	0	0	0	0	0	0	0	0	0	0.00114769	0	0	0	0	0	0	0	0	0	0	0	0	0	0	0	0	0	0	0	0	-0.0511433
SGN-U213496	SGN-U313630	0	0	0	0	0	0	0	0	0	0	0	0	0	0	0	0.187626	0	0	0	0	0	0	0	0	0	0	0	0	0	0	0	0	0	0	0	0	0	0	0	0	0	0	0	0	0	0	0	0
SGN-U213839	SGN-U314112	0	0	0	0	0	0	0	0	0	0	0	0	0	0	0	0	0	0	0	0	0	0	0	0	0	0	0	0	0	0	0	0	0	0	0	0	0	0	0	0	0	0	0	0	0	0	0	0
SGN-U218332	SGN-U318567	0	0	0	0	0	0	0	0	0	0	0	0	0	-0.286828	0	0	0	0	0	0	0	0	0	0	0.0082269	0	0	0	0	0	0	0	0	0	0	0	0	0	0	0	0	0	0	0	0	0	0	0
SGN-U216539	SGN-U317653	0	0	0	0	0	0	0	0	0	0	0	0	0	0	0	0	0	0	0	0	0	-0.0288232	0	0	0	0	0	0	0	0	0	0	0	0	0	0	0	0	0	0	0	0.0442668	0	0	0	0	0	0
SGN-U217224	SGN-U318545	0	0	0	0	0	0	0	0	0	0	0	0	0	0	0	0	0	0	0	0	0	0	0	0	0	0	0	0	0	0	0	0	0.327673	0	0	0	0	0	-0.19182	0	0	0	0	0	-0.0126329	0	0	0
SGN-U227530	SGN-U329316	0	0	0	0	0	0	-0.0541856	0	0	0	0	0	0	0	0	0	0	0	0	0	0	0	0	0	0	0	0	0	0	0	0	0	0	0	0	0	0	0	0	0	0	0	0	0	0	0	0	0
M32606		0	0	0	0	0	0.68032	0	0	0	0	0	0	0	0	0	0	0	0	0	0	0	0	0	0	0	0	0	0	0	0	0	0	0	0	-0.000247179	0	0.112103	0	0	0	0	0	0	0	0	0	0	0
SGN-U216072	SGN-U317173	0	0	0	0	0	0	0	0	0	0	0	0	0	0	0	0	-0.0238668	0	0	0	0	0	0	0	0	0	0	0	-0.169846	0	0	0	0	0	0	0	0	0	0	0	0	0	0	0	0	0	0	0
SGN-U215575	SGN-U316743	0	0	0	0	0	0	0	0	0	0	0	0	0	0	0	0	0	0	0	0	0	0	0	0	0	0	0	0	0	0	0	0	0	0	0	0	0	0	0	0	0	0	0	0	0	0	0	0
SGN-U213666	SGN-U313769	0	0	0	0	0	0	0	0	0	0	0	0	0	0	0	0	0	0	0	0	0	0	0	0	0	0	0	0	0	0	0	0	0	0	0	0	0	0	0	0	0	0	0	0	0	0	0	0
SGN-U221439		0	0	0	0	0	0	0	0	0	0.104996	0	0	0	0	0	0	0	0	0	0	0	0	0	0	0	0	-0.310715	0	0	0	0	0	0	0	0	0	0	0	0	0	0	0	0	0	0	0	0	0
SGN-U223548	SGN-U325688	0	0	0	0	0	0	0	0	0	0	0	0	0	0	0	0	0	0	0	0	0	0	0	0	0	0	-0.173996	0	0	0	0	0	0	0	0	0	0	0	0	0	0	0	0	0	0	0	0	0
SGN-U214905		0	0	0	0	0	0	0	0	0	0	0	0	0	0	0	0	0	0	0	0	0	0	-0.0978555	0	0	0	0	0	0	0	0	0	0	0	0	0	0	0	0	0	0	0	0	0	0	0	0	0
SGN-U217276	SGN-U319117	0	0.00266655	0	0	0	0	0	0	0	0	0	0	0	0	0	0	0	0	0	0	0	0	0	0	0	0	-0.0576824	0	0	0	0	0	0	0	0	0	0	0	0	0	0	0	0	0	0	0	0	0
AJ224356	AJ224356	0	0	0	0	0	0	0	0	0	0	0	0	0	0	0	0	0	0	0	0	0.159148	0	0	0	0	0	0	0	0.186235	0	0	0	0	0	0	0	0	0	0	0	0	0	0	0	0	0	0	0
SGN-U221559	SGN-U322067	0	0	0	0	0	0	0	0	0	0	0	0	0	0	0	0	0	0	0	0	0	0	0	0	0	0	0	0	0	0	0	0	0	0	0	0	0	0	0	0	0	0.0232709	0	0	0	0	0	0
SGN-U227342	SGN-U320398	0	0	0	0	-0.0739413	0	0	0	0	0	0	0	0	0	0	0	0	0	0	0	0	0	0	0	0	0	0	0	0	0	0	-0.0306334	0	0	0	0	0	0	0	0	0	0	0	0	0	0	0	0
SGN-U215838	SGN-U317658	0	0	0	0	0	0	0	0	0	0	0	0	0	0	0	0	0	0	0	0	0	0	0	0	0	0	0	0	0	0	0	0	0	0	0	0	0	0	0	0	0	0	0	0	0	0	0	0
SGN-U221502	SGN-U320289	0	0	0	0	0	0	0	0	0	0	0	0	0	0	0	-0.00236943	0	0	0	0	0	0	0	0	0	0	0	0	0	0	0	0	0	0	0	0	0	0	0	0	0.162245	0	0	0	0	0	0	0
SGN-U216635		0	0	0	0	0	0	0	0	0	0	0	0	0	0	0	0	0	0	0	0	0	0	0	0	0	0	0	0	0	0	0	0	0	0	0	0	0	0	0	0	0	0	0	0	0	0	0	0
SGN-U217982	SGN-U319433	0	0.14858	0	0.140752	0	0	0	0	0	0	0	-0.0691545	0	0	0	0	0	0	0	0	0	0	0	0	0	0	0	0	0.383439	0	0	0	0	0	0	0	0	0	0	0	0	0	0	0	0	0	0	0
SGN-U214608	SGN-U315368	0	0	0	0	0	0	0	0	0	0	0	0	0	0	0	0	0	0	0	0	0	0	0	0	0	0	0	0	0	0	0	0	0	0	-0.006665	0	0	0	0	0	0	0	0	0	0	0	0	0
SGN-U221661	SGN-U323715	0	0	0	0	0	0	0	0	0	0	0	0	0	0	-0.00891405	0	0	0	0	0	0	0.0812319	0	0	0	0	0	0	0	0	0	0	0	0	0	0	0	0	0	0	0	0	0	0	0	0	0	0
SGN-U213338	SGN-U313384	0	0	0	0	0	0	0	0	0	0	0	0	0	0	0	0	0	0	0	0	0	0	0	0	0	0	0	0	0	0	0	0	0	0	0	0	0	0	0	0.0933859	0	0	-0.0881688	0	0	0	0	0
SGN-U224146	SGN-U325958	0	0	0	0	0	0	0	0.184827	0	0	0	0	0	0	0	0	0	0	0	0	-0.0598393	-0.233964	0	0	0	0	0	0	0	0	0	0	0	0	0	0	0	0	0	0	0	0	0	0	0	0	0	0
SGN-U214991	SGN-U315631	0	0	0	0	0	0	0	0	0	0	0	0	0	0	0	0	0	0.182604	0	0	0	0	0	0	0	0	0	0	0	0	0.184101	0	0	0	0	0	0	0	0	0	0	0	0	0	0	0	0	0
SGN-U219194	SGN-U321010	0	0	0	0	0	0	0	0	0	0	0	0	0	0	0	0	0	0	0	0	0	0	0	0	0	0	0	0	0	0	0	0	0	0	0	0	0	0	0	0	0	0	0	0	0	0	0	0
SGN-U216219	SGN-U317631	0	0	0	0	0	0	0	0	0	0	0	0	0	0	0	0	0	0	0	0	0	0	0	0	0	0	0	0	0	0	0	0	0	0	0	0	0	0	0	0	0	0	-0.0209402	0	0	0	0	0
SGN-U219114	SGN-U320806	0	0	0	0	0	0	0	0	0	0	0	0	0	0	0	0	0	0	0	0	0	0	0	0	0	0	0	0	0	0	0	0	0	0	0	0	0	0	0	0	-0.186539	0	0	0.174561	0	0	0	0
SGN-U216214	SGN-U317056	0	0	0	0	0	0	0	0	0	0	0.00189207	0	0	0	0	0	0	0	0	0	0	0	0	0	0	0	0	0	0	0	0	0	0	0	0	0	0	0	0	0	0	0	0	0	0	0	0	0
SGN-U226278		0	0.00032356	0	0	0	0	0	0	0	0	0	0	0	0	0	0	0	0	0	0	0	0	0	0	0	0	0	0	0	0	0	0	0	0	0	0	0	0	0	0	0	0	0	0	0	0	0	0
SGN-U218716	SGN-U320159	0	0	0	0	0	0	0	0	0	0	0	0	0	0	0	0	0	0	0	0	0	0	0	0	0	0	0	0	0	0	0	0	0	0	0	0	0	0	0	0	0	0	0	0	0	0	0	0
SGN-U213972	SGN-U313053	0	0	0	0	0	0	0	0	-0.0305223	0	0	0	0	0	0	0	0	0	0	0	0	0	0	0	0	0	0	0	0	0	0	0	0	0	0	0	0	0	0	0	0	-0.0288773	0	0	0	0	0	0
SGN-U233482	SGN-U336256	0	0	0	0	0	0	0	0	0	0	0	0	0	0	0	0	0	0	0	-0.013982	0	0	0	0	0	0	0	0	0	0	0	0	0	0	0	0	0	0	0	0	0	0	0	0	0	0	0	0
SGN-U218429	SGN-U318402	0	0	0	0	0	0	0	0	0	0	0	0	0	0	0	0	0	0	0	0	0	0	0	0	0	0	0	0	0	0	0	0	0	0	0	0	0	0	0	0	0	0	0	0	0	0	0	0
SGN-U219314	SGN-U318346	0	0	0	0	0	0	0	0	0	0	0	0	0	0	0	0	0	0	0	0	0	0	0	0	0	0	0	0	0	0	0	0	0	0	0	0	0	0	0	0	0	0	0.179585	0	0	0	0	0
SGN-U223136	SGN-U318495	0	0	0	0	0.0237187	0	0	-0.141854	0	0	0.100842	0	0	0	0	0	0	0	0	0	0	0	0	0	0	0	0	0	0	0	0	0	0	0	0.000514433	0	0	0	0	0	0	0	0	0	0	0	0	0
SGN-U227526	SGN-U315177	0	0	0	0	0	0	0.050711	0	0	0	0	0	0	0	0	0	0	0	0	0	0	0	0	0	0	0	0	0	0	0	0	0	0	0	0	0	0	0	0	0	0	0	0	0	0	0	0	0
SGN-U226997	SGN-U325499	0	0	0	0	0	0	0	0	0	0	0	0	0	0	0	0	0	0	0	0	0	0	0	0	0	0	0	0	0	0	0	0	0	0	0	0	0	0	0	0	0	0	0	0	0	0	-0.021974	0
SGN-U221667	SGN-U319408	0	0	0	0	0	0	0	0	0	0	0	0	0	0	0	-0.0560768	0	0	0	0	0	0	0	0	0	0	0.103043	0	0	0	0	0	0	0	-0.151731	0	0	0	0	0	0	0	0	0	0	0	0	0
SGN-U218125	SGN-U319453	0	0	0	0	0	0	0	0	0	0	0	0	0	0	0	0	0	0	0	0	0	0	0	0.0401673	0	0	0	0	0	0	0	0	0	0	0	-0.0192942	0	0	-0.145011	0	0	0	0	0	0	-0.374617	0	0
SGN-U216712		0	0	0	0	0	0	0	0	0	0	0	0	0.0952387	0	0	0	0	0	0	0	0	0	0	0	0	0	0	0	0	0	0	0	0	0	0	0	0	0	0	0	0	0	0	0	0	0	0	0
SGN-U215259	SGN-U315166	0	0	0	0	0	0	0	0	0	0	0	0	0	0	0	0	0	0	0	0	0	0	0	0	0	0	0	0	0	0	0	0	0	0	0	0	-0.0562634	0	0	0	0	0	0	0	0	0	0	0
SGN-U214065	SGN-U315028	0	0	0	0	0	0	0	0	0	0	0	0	0	0	0	0	0	0	0	0	0	0	0	0	0	0	0	0	0	0	0	0	0	0	0	0	0	0	0	0	0	0	0	0	0	0	0	0
SGN-U221297	SGN-U322951	0	0	0	0	0	0	0	0	0	0	0	0	0	0	0	0	0	0	0	0	0	0	0	0	0	0	0	0	0	0	0	0	0	0	0	0	0	0	0	0	0	0	0	0	0	0	0	0
SGN-U216016	SGN-U316699	0	0	0	0	0	0	0	0	0	0	0	0	0	0	0	0	0	0	0	0	0	0	0	0	0	0	0	0	0	0	0	0	0	0	0	0	0	0	0	0	0	0	0	0	0	0	0	0
SGN-U216269	SGN-U316821	0	0	0	0	0	0	0	0	0	0	0	0	0	0	0	0	0	0	0	0	0	0	0	0	0	0	0	0	0	0	0	0	0	0	0	0	0	0	0	0	0	0	0	0	0	0.238431	0	0
SGN-U215760	SGN-U317562	0	0	0	0	0	0	0	0	0	0	0	0	0	0	0	0	0	0	0	0	0	0	0	-0.0439087	0	0	0	0	-0.125693	0	0	0	0	0	0	0	0	0	0	0	0	0	0	0	0	0	0	0
SGN-U220175	SGN-U319378	0	0	0.0712173	0	0	0	0	0	0	0	0	0	0	0	0	0	0	0	0	0	0	0	0	0	0	0	0	0	0	0	0	0	0	0	0	0	0	0	0	0	0	0	0	0	0	0	0	0
SGN-U217893	SGN-U318499	0	0	0	0	0	0	0	0	0	0	0	0	0	0	0	0	0	0	0	0	0	0	0	0	0	0	0	0	0	0	0	0	0	0	0	0	0	0	0	0	0	0	0	0	0.0526029	0	0	0.118014
SGN-U212615		0	0	0	0	0	0	0	0	0	0	0	0	0	0	0	0	0	0	0	0	0	0	0	0	0	0	0	0	0	0	0	0	0	0	0	0	0	0	0	0	0	0	0	0	0	0	0	0
SGN-U213238	SGN-U312999	0	0	0	0	0.159762	0	0	0	0	0	0	0	0	0	0	0	0	0	0	0	0	0	0	0	0	0	0	0	0	0	0	0	0.0161799	0	0	0	0	0	0	0	0	0	0	0	0	0	0	0
SGN-U213061	SGN-U312800	0	0	0	0	0	0	-0.0108094	0	0	0	0	0	0	0	0	0	0	0	0	0	0	0	0	0	0	0	0	0	0	0	0	0	0	0	0	0	0	0	0	0	0	0	0.0967895	0	0	0	0	0
SGN-U219932	SGN-U317823	0	0	0	0	0	0	0	0	0	0	0	0	0	0	0	0	0	0	0	0	0	0	0	0	0	0	-0.0573722	0	0	0	0	0	0	0	0	0	0	0	0	0	0	0	0	0	0	0	0	0
SGN-U224187	SGN-U327450	0	0	0	0	0	0	0	0	0	0	0	0	0	0	0	0	0	0	0	0	0	0	0	0	0	0	0	0	0	0	0	0	0	0	0	0	0	0	0	0	0	0	0	0	0	0	0	0
SGN-U214351	SGN-U315295	0	0	0	0	0	0	0	0	0	0	0.0441588	0	0	0	0	0	0	0	0	0	0	0	0	0	0	0	0	0	0	0	0	0	0	0	0	0	0	0	0	0	0	0	0	0	0	0	0	0
SGN-U213704	SGN-U313542	0	0	0	0	0	0	0	0	0	0	0	0.0723391	0	0	0	0	0	0	0	0	0	0	0	0	0	0	0	0	0	0	0	0	0	0	0	0	0	0	0	0	0	0	0	0	-0.0348591	0	0	-0.0287116
SGN-U217454	SGN-U319191	0	0	0	0	0	0	0	0	0	0	0	0	0	-0.0972063	0	0	0	0	0	0	-0.0444551	0	-0.0599203	0	0	0	0	0	0	0	0	0	0	0	0	0	0	0	0	0	0	0	0	0	0	0	0	0
SGN-U219733	SGN-U321937	0	0	0	0	0	0	0	0	0	0	0	0	0	0	0	0	0	0	0	0	0	0	0	0	0	0	0	0	0	0	0	0	0	0	0	0	0	0	0	0	0	0	0	0	0	0	0	0
SGN-U220257		0	0	0	0	0	0	0	0	0	0	0	0	0	0	0	0	0	0	0	0	0	0	0	0	0	0	0	0	0	0	0	0	0	0	0	0	0	0	0	0	0	0	0	0	0	0	0	0
SGN-U219470	SGN-U321779	0	0	0	0	0	0	0	0	0	0	0	0	0	0	0	0	0	0	0	0	0	0	0	0	0	0	0	0	0	0	0	0	0	0	0	0	0	0	0	0	0	0	0	0	0	0	0	0
SGN-U217907	SGN-U318352	0	0	0	0	0	0	0	0	0	0	0	0	0	0	0	0	0	0	0	0	0	0	0	0	0	0	0	0	0	0	0	0	0	0	0	0	0	0	0	0	0	0	0	0	-0.123474	0	0	0
SGN-U216995	SGN-U317444	0	0.036509	0	0	0	0	0	0	0	0	0	0	0	0	0	0	0	-0.150512	0	0	0	0	0	0	0	0	0	0	0	0	0	0	0	0	0	0	0	0	0	0	0.0585973	0	0	0	0	0	0	0
SGN-U214480	SGN-U312632	0	0	0	0	0	0	0	0	0	0	0	0	0	0	0	0	0	0	0	0	0	0	0	0	0	0	0	0	0	0	0	0	0	0	0	0	-0.00141553	0	0	0	0	0	-0.0835767	0	0	0	0	0
SGN-U221220	SGN-U324417	0	0	0	0	0	0	0	0	0	0	0	0	0	0	0	0	0	0	0	0	0	0	0	0	0	0	0	0	0	0	0	0	0	0	0	0	0	0	0	0	0	0	0	0	0	0	0	0
SGN-U216708	SGN-U312884	0	-0.0939223	0	0	0	0	0	0	0	0	0	0	0	0	0	0	0	0	0	0	0	0	0	0	0	0	0	0	0	0	0	0	0	0	0	0	0	0	0	0	0	0	0	0	0	0	0	0
SGN-U219500	SGN-U319943	0	0	0	0	0	0	0	0	0	0	0	0	0	0	0	0	0	0	0	0	0	0	0	0	0	0.0840598	0	0	0	0	0	0	0	0	0	0	0	0	0	0	0	0	0	0	0	0	0	0
SGN-U222265		0	0	0	0	0	0	0	0	0	0	0	0	0	0	0	0	0	0	0	0	0	0	0	0	0	0	0	0	0	0	0	0	0	0	0	0	0	0	0	0	0	0	0	0	0	0	0	0
SGN-U218491		0	0	0	0	0	0	0	0	0	0	0	0	0	0	0	0	0	0	0	0	0	0	0	0	0	0	0	0	0	0	0	0	0	0	0	0	0	0	0	0	0	0	0	0	0	0	0	0
SGN-U221524	SGN-U321577	0	0	0	0	0	0	0	0	0	0	0	0	0	0	0	0	0	0	0	0	0	0	0	0	0	0	0	0	0	0	0	0	0	0	0	0	0	0	0	0	0	0	0	0	0	0	0	0
SGN-U222167	SGN-U323525	0	0	0	0	0	0	0	0	0	0	0	0	0	0	0	0	0	0	0	0	0	0	0	0	0	0	0	0	0	0	0	0	0	0	0	0	0	0	0	0	0	0	0	0	0	0	0	0
SGN-U216038	SGN-U316645	0	0	0	0	0	0	0	0	0	0	0	0	0	0	0	0	0	0	0	0	0	0	0	0	0	0	0	0	0	0	0	0	0	0	0	0	0	0	0	0	0	0	0	0	0	0	0	0
SGN-U215560	SGN-U316780	0	0	0	0	0	0	0	0	0	0	0	0	0	0	0	0	0	0	0	0	0	0	0	0	0	0	0	0	0	0	0	0	0	0	0	0	0	0	0	0	0	0	0	0	0	0	0	0
SGN-U220586	SGN-U323385	0	0	0	0	0	0	0	0	0	0	0	0	0	0	0	0	0	0	0	0	0	0	0.0121187	0	0	0	0	0	0	0	0	0	0	0	0	0	0	0	0	0	0	0	0	0	0	0	0	0
SGN-U219997	SGN-U321259	0	0	0	0	0	0	0	0	0	0	0	0	0	0	0	0	0	0	0	0	0	0	0	0	0	0	0	0	0	0	0	0	0	0	0	0	0	0	0	0	0	0	0	0	0	0	0	0
SGN-U213351	SGN-U313409	0	0	0	0	0	0	0	0	0	0	0	0	0	0	0	0.0747738	0	0	0	0	0	0	0	0	0	0	0	0	0	0	0	0	0	0	0	0.127216	0	0	0	0	0	0	0	0	0	0	0	0
SGN-U216352	SGN-U317682	0	0	0	0	0	0	0	0	0	0	0	0	0	0	0	0	0	0	0	0	0	0	0	0	0	0	0	0	0	0	0	0	0	0	0	0	0	0	0	0	0	0	0	0	0	0	0	0
SGN-U225319	SGN-U325096	0	0	0	0	0	-0.163272	0	0	0	0	0	0	0	0	0	0	0	0	0	0	0	0	0	0	0	0	0	0	0	0	0	0	0	0	0	0	0	0	0	0	0	0	0	0	0	0	0	0
SGN-U221913	SGN-U324313	0	0	0	0	0	0	0	0	0	0	0	0	0	0	0	0	0	0	0	0	0	0	0	0	0	0	0	0	0	0	0	0	0	0	0	0	0	0	0	0	0	0	0	0	0	0	0	0
SGN-U219942	SGN-U321581	0	0	0	0	0	0	0	0	0	0	0	0	0	0	0	0	0	0	0	0	0	0	0	0	0	0	0	0	0	0	0	0	0	0	0	0	0	0	0	0	0	0	0	0	0	0	0	0
SGN-U227391	SGN-U323394	0.00827164	0	0	0	0	0	0	0	0	0	0	0	0	0	0	0	0	0	0	-0.0850193	0	0	0	0	0	0	0	0	0	0	0	0	0	0	0	0	0	-0.135978	0	0	0	0	0	0	0	0	0	0
SGN-U229620	SGN-U332761	0	0	0	0	0	0	0	0	0	0	0	0	0	0	0	0	0	0	0	0	0	0	0	0	0	0	0	0	0	-0.122061	0	0	0	0.170194	0	0	0	0	0	0	0	0	0	0	0	0	0	0
SGN-U222651	SGN-U317997	0	0	0	0	0	0	0	0	0	0	0	0	0	0	0	0	0	0	0	0	0	0	0	0	0	0	0	0	0	0	0	0	0	0	0	0	0	0	0	0	0	0	0	0	0	0	0	0
SGN-U221804		0	0	0	0	0	0	0	0	0	0	0	0	0	0	0	0	0	0	0	0	0	0	0	0	0	0	0	0	0	0	0	0	0	0	0	0	0	0	0	0	0.0437493	0	0	0	0	0	0	0
SGN-U219503	SGN-U314174	0	0	0	0	0	0	0	0	0	0	0	0	0	0	0	0	0	0	0	0	0	0	0	0	0	0	0	0	0	0	-0.071346	0	0	0	0	0	0	0	0	0	0	0	0	0	0	0	0	0
U77719	U77719	0	0	0	0	0	0	0	0	0	0	0	0	0	0	0	0	0	0	0	0	0	0	0	0	0	0	0	0	0	0	0	0	0	0	0	0	0	0	0	0	0	0	0	0	0	0	0	0
SGN-U217151	SGN-U318180	0	0	0	0	0	0	0	0	0	0	0	0	0	0	0	0.204637	0	0	0	0	0	0	0	0	0	0	0	0	0	0	0	0	0	0	0	0	0	0	0	0	0	0	0	0	0	0	0	0
SGN-U219364		0	0	0	0	0	0	0	0	0	0	0	0	0	0	0	0	0	0	0	0	0	0	0	0	0	0	0	0	0	0	0	0	0	0	0	0	0	0	0	0	0	0	0	0	0	0	0	0
SGN-U217068		0	0	0	0	0	0	0	0	0	0	0	0	0	0	0	0	0.031437	0	0	0	0	0	0	0	0	0	0	0	0	0	0	0	0	0	0	0	0	0	-0.020117	0	0	0	0	0	0	0	0	0
SGN-U214001	SGN-U314062	0	0	0	0	0	0	0	0	0	0	0	0	0	0	0	0	0	0	0	0	0	0	0	0	0	-0.222901	0	0	0	0	0	0	0	0	0	0	0	0	0	0	0	0	0	0	0	0	0	0
SGN-U213977	SGN-U314151	0	0	0	0	0	0	0	0	0	0	0	0	0	0	0	0	0	-0.129596	0	0	0	0	0	0	0	0	0	0	0	0	0	0	0	0	0	0	0	0	0	0	0	0	0	0	0	0	0	0
SGN-U214151	SGN-U313712	0	0	0	0	0	0	0	0	0	0	0	0	0	0	0	0	0	0	0	0	0	0	0	0	0	0	0	0	0	0	0	0	0	0	0	0	0	0	0	0	0	0	0	0	0	0	0	0
SGN-U212979	SGN-U313113	0	0.0462058	0	0	0	0	0	0	0	0	0	0	0	0	0	0	0	0	0	0	0	0	0	0	0	0	0	0	0	0	0	0	0	0	0	0	0	0	0	0	0	0	0	0	0	0	0	0
SGN-U219181	SGN-U321640	0	0	0	0	0	0	0	0	-0.0846731	0	0	0	0	0	0	0	0	-0.00219457	0	0	0	0	0	0	0	0	0	0	0	0	0	0	0	0	0	0	0	0	0.34241	0	0	0	0	0	0	0	0	0
SGN-U229808	SGN-U332421	0	0	0	0	0	0	0	0	0	0	0	0	0	0	0	0	0	0	0	0	0	0	0	0	0	0	0	0	0	0	0	0	0	0	0	0	0	0	0	0	0	0	0	0	0	0	0	0
SGN-U222991	SGN-U321576	0	0	0.121352	0	0	0	0	0	0	0	0	0	0	0	-0.248982	0	0	0	0	0	0	0	0	0	0	0	0	0	0	0	0	0	0	0	0	0	0	0	0	0	0	0	0	0	0	0	0	0
SGN-U214963	SGN-U316043	0	0	0	0	0	0	0	0	0	0.582645	0	0	0	0	0	0	0	0	0	0	0	0	0	0	0	0	0	0	0	0	0	0	0	0	0	0	0	0	-0.071004	0	0	0	0	0	0	0	0	0
SGN-U214943	SGN-U314973	0	0	0	0	0	0	0	0	0	0	0	0	0	0	0	0	0	0	0	0	0	0	0	0	0	0	0	0	0	0	0	0	0	0	0	0	0	0	0	0	0	0	0	0	0	0	0	0
SGN-U212780	SGN-U314554	0	0	0	0	0	0	0	0	0	0	0	0	0	0	0	0	0	0	0	0	0	0	0	0	0	0	0	0	0	0	0	0	0	0	0	0	0	0	0	0.261015	0	0	0	0	0	0	0	0
SGN-U226166	SGN-U330048	0	0	0	0	0	0	0	0	0	0	0	0	0	0	0	0	0	0	0	0	0	0	0	0	0	0.129253	0	0	0	0	0	0	0	0	0	0	0	0	0	0	0	0	0	0	0	0	0	0
SGN-U215168	SGN-U316497	0	0	0	0	0	0	0	0	0	0	0	0	0	0	0	0	0	0	0	0	0	0	0	0	0	0	0	0	0	0	0	0	0	0	0	0.043954	0	0	0	0	0	0	0	0	0	0	0.0427812	0
SGN-U216444	SGN-U318416	0	0	0	0	0	0	0	0	-0.0190883	0	0	0	0	0	0	0	0	0	0	0	0	0	0	0	0	0	0	0	0	0	0	0	0	0	0	0	0	0	0	0	0	0	0	0	0	0.139002	0	0
SGN-U213191	SGN-U312851	0	0	0	0	0	0	0	0	0	0	0	0	0	0	0	0	0	0	0	0	0.234036	0	0	0	0	0	0	0	0	0	0	0	0	0	0	0	0	0	0	0	0	0	0	0	0	0	0	0
SGN-U214848	SGN-U315951	0	0	0	0	0	0	0	0	0	0	0	0	0	0	0	0	0	0	0	0	0	0	0	0	0	0	0	0	0	0	0	0	0	0	0	0	0	0	0	0	0	0	0	0	0	0	0	0.0388781
SGN-U224525		0	0	0	0	0	0	0	0	0	0	0	0	0	0	0	0	0	0	0	0	0	0	0	0	0	0	0	0	0	0	0	0	0	0	0	0	0	0	0	0	0	0	0	0	0	0	0	0
SGN-U217308	SGN-U319472	0	0	0	0	0.0361609	0	0	0	-0.086251	0	0	0	0	0	0	0	0	0	0	0	0	0	0	0	0	0	0	0	0	0	0	0	0	0	0	0	0	0	0	0	0	0	0	0	0	0	0	0
SGN-U216648	SGN-U316774	-0.066717	0	0	0	0	0	0	0	0	0	0	0	0	0	0	0	0	0	0	0	0	0	0	0	0	0	0	0	0	-0.0703352	0	0	0	0.0621631	0	0	0	0	0	0	0	0	0	0	0	0	0	0
SGN-U216689	SGN-U317869	0	0	0	0	0.237159	0	0	0	0.0232602	0	0	0	0	0	0	0	0	0	0	0	0	0	0	0	0	0	0	0	0	0	0	0	0	0	-0.268817	0	0	0	0	0	0	0	0	0	0	0	0	0
SGN-U215416	SGN-U316127	0	0	0	0.0174519	0	0	0	0	0	0	0	0	0.0362548	0	0	0	0	0	0	0	0	0	0	0.327376	0	0	0	0	0	0	0	0	0	0	0	0	0	0	0	0	0	0	0	0	0	0	0	0
SGN-U218339	SGN-U319965	0	0	0.221049	0	0	0	0	0	0	0	0	0	0	0	0	0	0	0	0	0	0	0	0	0	0	0	0	0	0	0	0	0	0	0	0	0	0	0	0	0	0	0	0	0	0	0	0	0
SGN-U227156	SGN-U324894	0	0	0	0	0	0	0	0	0	0	0	0	0	0	0	0	0	0	0	0	0	0	0	0	0	0	0	0	0	0	0	0	0	0	0	0	0	0	0	0	0	0	0	0	0	0	0	0
SGN-U218017	SGN-U320259	0	0	0	0	0	0	0	0	0	0	0	0	0	0	0	0	0	0	0	0	0	0	0	0	0	0	0	0	0	0	0	0	0	0	0	0	0	0	0	0	0	0	0	0	0	0	0.0912528	0
SGN-U228776	SGN-U327674	0	0	0	0	0	0	0	0	0	0	0	0	0	0	0	0	0	0	0	0	0	0	0	0	0	0	0	0	0	0	0	0	0	0	0	0	0	0	0	0	0	0	0	0	0	0	0	0
SGN-U215402	SGN-U316507	0	0	0	0	0	0	0	0	0	0	0	0	0	0	0	0	0	0	0	0	0	0	0	0	0	0	0	0	0	0	0	0	0	0	0	0	0	0	0	0	0	0	0	0	0	0	0	0
SGN-U223160	SGN-U325676	0	0	0	0	0	0	0	0	0	0	0	0	0	0	0	0	0	0	0	0	0	0	0	0	0	0	0	0	0	0	0	0	0	0	0	0	0	0	0	0	0	0	0	0	0	0	0	0
SGN-U215144	SGN-U315615	0	0	0	0	0	0	-0.265029	0	0	0	0	0	0	0	0	0	0	0	0	0	0	0	0	0	0	0	0	0	0	0	0	0	0	0	0	0	0	0	0	0	0	0	0	0	0	0	0	0
SGN-U214092	SGN-U312775	0	0	0	0	0	0	0	0	0	0	0	0	0	0	0	0	0	0	0	0	0	0	0	0	0	0	0	0	0	0	0	0	0	0	0	0	0	0	0	0	0	0	0	0	0	0.0810385	0	0
SGN-U218118	SGN-U318794	0	0	0	0	0	0	0	0	0	0	0	0	0	0	0	0	0	0	0	0	0	0	0	0	0	0	0	0	0	0	0	0	0	0	0	0	0	0	0	0	0	0	0	0	0	0	0	0
SGN-U224209	SGN-U323470	0	0.377189	0	0	0	0	0	0	0	0	0	0	0	-0.149527	0	0	0	0	0	0	0	0	0	0.127798	0	0	0	0	0	0	0	0	0	0	0	0	0	0	0	0	0	0	0	0	0	0	0	0
SGN-U222008	SGN-U321710	0	0	0	0	0	0	0	0	0	0	0	0	0	0	0	-0.0500474	0	0	0	0	0	0	0	0	0	0	0	0	0	0	0	0	0	0	0	0	0	0	0	0	0	0	0	0	0	0	0	0
SGN-U227123	SGN-U328657	0	0	0	0	0	0	0	0	0	0	0	0	0	0	0	0	0	0	0	0	0	0	0	0	0	0	0	0	0	0	0	0.0313341	0	0	0	0	0	0	0	0	0	0	0	0	0	0	0	0
SGN-U227329	SGN-U329772	0	0	0	0	0	0	0	0	0	0	0	0	0	0	0	0	0	0	0	0	0	0	0	0	0	0	0	0	0	0	0	0	0	0	0	0	0	0	0	0	0	0	0	0	0	0	0	0
SGN-U231178	SGN-U326533	0	0	0	0	0	0	0	0	0	0	0	0	0	1.11388	0	0	0	0	0	0	0	0	0	0	0	0	0	0	0	0	0	0	0	0	0	0	0	0	0	0	0	0	0	0	0	0	0	0
SGN-U213130	SGN-U314753	0	0	0	0	-0.128192	0	0	0	0	0	0	0	0	0	0	0	0	0	0	0	0	0	0	0	-0.152831	0	0	0	0	0	0	0	-0.00968745	0	0	0	0	0	0	0	0	0	0	0	0	0	0	0
SGN-U230947		0	0	0.0569447	0	0	0	0	0	0	0	0	0	0	0	0	0	0	0	0	0	0	0	0	0	0	0	0	0	0	0	0	0	0	0	0	0	0	0	0	0	0	0	0	0	0	0	0	0
SGN-U217379	SGN-U319437	0	0	0	-0.0306558	0	0	0	0	0	0	0	0	0	0	0	0	0	0	0	0	0	0	0	0	0	0	0	0	0	0	0	0	0	0	0	0	0	0	0	0	0	0	0	0	0	0	0	0
SGN-U231465	SGN-U330652	0	0	0	0	0	0	0	0	0	0	0	0	0	0	0	0	0	-0.0894672	0	0	0	0	0	0	0	0	0	0	0	0	0	0	0	0	0	0.0958826	0	0	0	0	0	0	0	0	0.162093	0	0	0
SGN-U216921		0	0	0	0	0	0	0	0	0	0	0	0	0	0	0	0	0	0	0	0	0	0	0	0	0	0	0	0	0	0	0	0	0	0	0	0	0	0	0	0	0	0	0	0	0	0	0	0
SGN-U217640	SGN-U315914	0	0	0	0	0	0	0	0	0	0	0	0	0	0	0	0	0	0	0	0	0	0	0	0	0	0	0	0	0	0	0	0	0	0	0	0	0	-0.0466227	0.162725	0	0	0	0	0	0	0	0	0
SGN-U221510	SGN-U318018	0	0	0	0	0	0	0	0	0	0	0	0	0	0	0	0	0	0	0	0	0	0	0	0	0	0	0	0	0	0	0	0	0	0	0	0	0	0	0	0	0	0	0	0	0	0	0	0
SGN-U225308	SGN-U326666	0	0	0	0	0	0	0	0	0	0	0	0	0	0.0133569	0	0	0	0	0	0	0	0	0	0	0	0	0	0	0	0	0	0	0	0	0	0	0	0	0	0	0	0	0	0	0	0	0	0
SGN-U218485	SGN-U321178	0	0	0	0	0	0	0	0	0	0	0	0	0.162336	0	0	0	0	0	0	0	0	0	0.165332	0	0	0	0	0	0	0	0	0	0	0	0	0	0	0	0	0	0	0	0	0	0	0	0	0
SGN-U214005	SGN-U313833	0	0	0	0	0	0	0	-0.0639153	0	0	0	0	0	0	0	0.0308306	0	0	0	0	0	0	0	0	0	0	0	0	0	0	0	0	0	0	0	0	0	0	0	0	0	0	0	0	0	0	0	0
SGN-U215788	SGN-U320013	0	0	0	0	0	0	0	0	0	0	0	0	0	0	0.0769967	0	0	0	0	0	0	0	0	0	0.210572	0	0	0	0	0	0	0	0	0	0	0	0	0	0	0	0	0	0	0	0	0	0	0
SGN-U220224	SGN-U318668	0	0	0	0	0	0	0	0	0	0	0	0	0	0	0	0	0	0	0	0	0	0	0	0	0	0	0	0	0	0	0	0	0	0	0	0	0	0	0	0	0	0	0	0	0	0	0	0
SGN-U221686	SGN-U323348	0	0	0	0	0	0	0	0	0	0	0	0	0	0	0	0	0	0	0	0	0	0	0	0	0	0	0	0	0	0	0	0	0	0	0	0	0	0	0	0	0	0	0	0	0	0	0	0
SGN-U220743	SGN-U322110	0	-0.147266	0	0.139568	0	0	0	0	0	0	0	0	0	0	0	0	0	0.0765982	0	0	0	0	0	0	0	0	0	0	0	0	0	0	0	0	0	0	0	0	0	0	0	0	0	0	0	0	0	0.225903
SGN-U218419	SGN-U320637	0	0	0	0	0	0	0	0	0	0	0	0	0	0	0	0	0	0	0	0	0	0	0	0	0	0	0	0	0	0	0	0	0	0	0	0	0	0	0	0	0	0	0	0	0	0	0	0
SGN-U224267	SGN-U327001	0	0	0	0	0	0	0	0	0	0	0	0	0	0	0	0	0	0	0	0	0	0	0	0	0	0	0	0	0	0	0	0	0	0	0	0	0	0	0	0	0	0	0	0	0	0	0	0
SGN-U218715		0	0	0	0	0	0.0626999	0	0	0	0	0	0	0	0	0	0	0	0	0	0	0	0	0	0	0	0	0	0	0	0	0	0	0	0	0	0	0	0	0	0	0	0	0	0	0	0	0	0
SGN-U215820	SGN-U317504	0	0	0	0	0	0	0	0	0	0	0	0	0	0	0	0	0	0	0	0	0	0	0	0	0	0	0	-0.156838	0	0	0	0	0	0	0	0	0	0	0	0	0	0	0	0	0	0	0	0
SGN-U212614	SGN-U314473	0	0	0	0	0	0	0	0	0	0	0	0	0	0.502358	0	0	0	0	0	0	0	0	0	0	0	0	0	0	0	0	0	0	0	0	0	0	0	0	0	0	0	0	0	0	0	0	0	0
SGN-U226030	SGN-U328613	0	0	0	0	0	0	0	0	0	0	0	0	0	0	0	0	0	0	0	0	0	0	0	0	0	0	0	0	0	0	0	0	0	0	0	0	0	0	0	0	0	0	0	0	0	0	0	0
SGN-U226313	SGN-U327656	0	0	0	0	0	0	-0.0147893	0	0	0	0	0	0	0	0	0	0	0	0	0	0	0	0	0	0	0	0	0	0	0	0	0	0	0	0	0	0	0	0	0	0	0	0	0	0	0	0	0
SGN-U215149	SGN-U314636	0	0	0	0	0	0	0	0	0	0	0	0	0	0	-0.0346128	0	0	0	0	0	0	0	0	0	0	0	0	0	0	0	0	0	0	0	0	0	0	0	0	0	0	0	0	0	0	0	0	0
SGN-U219689	SGN-U322476	0	0	0	0	0	0	0	0	0	0	0	0	0	0	0	0	0	0	0	0	0	0	0	0	0	0	0	0	0	0	0	0	0	0	0	0	0	0	0	0	0	0	0	0	0	0	0	0
SGN-U212914	SGN-U314405	0	0	0	0	0	0	0	0	0	0	0	0	0	0	0	0	0	0	0	0	0	0	0	0	0	0	0.0693084	0	0.0869023	0	0	0	0	0	0	0	0	0	0	0	0	0	0	0	0	0	0	0
SGN-U218068	SGN-U318660	0	0	0	0	0	0	0	0	0	0	0	0.00708099	0	0	0	0	0	0	0	0	0	0	0	0	0	0	0	0	0	0	0	0	0	0	0	0	0	-0.288988	0	0	0	0	0	0	0	0	0	0
SGN-U214063	SGN-U313856	0	0	0	0	0	0	0	0	0	0	0	0	0	0	0	0	0	0	0	0	0	0	0	0	0	0	0	0	0	0	0	0	0	0	0	0	0	0	0	0	0	0	0	0	0	0	0	0
SGN-U215996	SGN-U317500	0	0	0	0	0	0	0	0	0	0	0	0	0	0	0	0	0	0	0	0	0.16175	0	0	0	0	0	0	0	0	0	0	0	0	0	0	0	0	0	0	0	0	0	0	0	0	0	0	0
SGN-U222011	SGN-U325001	0	0	0	0	0	0	0	0	0	0	0	0	0	0	0	0	0	0	0	0	0	0	0	0	0	0	0	0	0	0	0	0	0	0	0	0	0	0	0	0	0	0	0	0	0	0	0	0
SGN-U221075	SGN-U322753	0	0	0	0	0	0	0	0	0	0	0	0	0	0	0	0	0	0	0	0	0	0	0	0	0	0	0	0	0	0	0	0	0	0	0	0	0	0	0	0	0	0	0	0	0	0	0	0
SGN-U218274	SGN-U319637	0	0	0	0	0	0	0	0	0	0	0	0	0	0	0	0	0	0	0	0	0	0	0	0	0	0	0	0	0	0	0	0	0	0	0	0	0	0	0	0	0	0	0	0	0	0	0	0
SGN-U223903	SGN-U321075	0	0	0	0	0	0	0	0	0	0	0	0	0	0	0	0	0	0	0	0	0	0	0	0	0	0	0	0	0	0	0	0	0	0	0	0	0	0	0	0	0	0	0	0	0	0	0	0
SGN-U214537	SGN-U314378	0	0	0	0	0	0	0	0	0	0	0	0	0	0	0	0	0	0	0	0	0	0	0	0	0	0	0	0	0	0	0	0	0	0	0	0	0	0	0	0	0	0	0	0	0	0.243714	0	0
SGN-U216333	SGN-U317255	0	0	0	0	0	0	0	0	0	0	0	0	0	0	0	0	0	0	0	0	0	0	0	0	0	0	0	0	0	0	0	0	0	0	0	0	0	0	0.0523817	0	0	0	0	0	0	0	0	0
SGN-U225520	SGN-U314245	0	0	0	0	0	0	0	0	0	0	0	0	0	0	0	0	0	0	0	0	0	0	0	0	0	0	0	0	0	0	0	0	0	0	0	0	0	0	0	0	0	0	0	0	0	0	0	0
SGN-U221133	SGN-U324271	0	0	0	0	0	0	0	0	0	0	0	0	0	0	0	0	-0.0061156	0	0	0	0	0	0	0	0	0	0	0	0	0	0	0	0	0	0	0	0	0	0	0	0	0	0	0	0	0	0	0
SGN-U223177	SGN-U325415	0	0	0	0	0	0	0	0	0	0	0	0	0	0	0	0	0	0	0	0	0	0	0	0	0	0	0	0	0	0	0	0	0	0	0	0	0	0	0	0	0	0	0	0	0	0	0	0
SGN-U219149	SGN-U318956	0	0.0800783	0	0	0	0	0	0	0	0	0	0	0	0	0	0	0	0	0	0	0	0	0	0	0	0	0	0	0	0	0	0	0	0	0	0	0	0	0	0	0	0	0	0	0	0	0	0
SGN-U215593	SGN-U316746	0	0	0	0	0	0	0	0	0	0	0	0	0	0	0	0	0	0	0	0	0	0	0	0	0	0	0	0	0	0	0	0	0.197108	0	0	0	0	0	0	0	0	0	0	0	0	0	0	0
SGN-U213767	SGN-U313553	0	0	0	0	0	0	0	0	0	0	0	0	0	0	0	0	0	0	0	0	0	0	0	0	0	0	0	0	0	0	0	0	0	0	0	0	0	0	0	0	0	0	0	0	0	0	0	0
SGN-U225360	SGN-U324043	0	0	0	0	0	0	0	0	0	0	0	0	0	0	0	0	0	0	-0.114291	0	0	0	0	0	0	0	0	0	0	0	0	0	0	0	0	0	0	0	0	0	0	0	0	0	0	0	0	0
SGN-U219408		0	0	0	0	0	0	0	0	0	0	0	0	0	0	0	0	0	0	0	0	0	0	0	0	0	0	0	0	0	0	0	0	0	0	0	0	0	0	0	0	0	0	0	0	0	0	0	0
SGN-U230826	SGN-U333021	0	0	0	-0.101962	0	0	0	0	0	0	0	0	0	0	0	0	0	0	0	0	0	0	0	0	0	0	0	0	0	0	0	0	0	0	0	0	0	0	0	0	0	0	0	0	0	0	0	0
SGN-U218335	SGN-U318769	0	0	0	0	0	0	0	0	0	0	0	0	0	0	0	0	0	0	0	0	0	0	0	0	0	0	0	0	0	0	0	0	0	0	0	0	0	0	0	0	0	0	0	0	0	0	0	0
SGN-U213607	SGN-U313757	0	0	0	0	0.0349725	0	0	0	0	0	0	0	0	0	0	0	0	0	0	0	0	0	-0.152811	0	0	0	0	0	0	0	0	0	0	0	0	0	0	0	0	0	0	0	0	0	0	0	-0.0609481	0
SGN-U215635	SGN-U317352	0	0	0	0	0	0	0	0	0	0	0	0	0	0	0	0	0	0	0	0	0	0	0	0	0	0	0	0	0	0	0	0	0	0	0	0	0	0	0	0	0	0	0	0	0	0	0	0
SGN-U220810	SGN-U322671	0	0	0	0	0	0	0	0	0	0	0.359963	0	0	0	0	0	0	0	0	0	0	0	0	0	0	0	0	0	0	0	0	0	0	0	0	0	0	0	0	0	0	0	0	0	0	0	0	0
SGN-U232990	SGN-U335271	0	0	0	0	0	0.0355686	0	0	0.0405135	0	0	0	0	0	0	0	0	0	0	0	0	0	0	0	0	0	0	0	0	0	0	0	0	0	0	0	0	0	0	0	0	0	-0.224909	0	0	0	0	0
SGN-U221127	SGN-U323375	0	0	0	0	0	0	0	0	0	0	0	0	0	-0.314427	0	0	0	0	0	0	0	0	0	0	0	0	0	0	0	0	0	0	0	0	0	0	0	0	0	0	0	0	0	0	0	0	0	0
SGN-U221272	SGN-U323030	0	0	0	0	0	0	0	0	0	0	0	0	0	0	-0.0772126	0	0	0	0	0	0	0	0	0	0	0	0	0	0	0	0	0	0	0	0	0	0	0	0	0	0	0	0	0	0	0	0	0
SGN-U229627		0	0	0	0	0	0	0	-0.0169533	0	0	0	0	0	0	0	0	0	0	0	0	0	0	0	0	0	0	0	0	0	0	0	0	0	0	0	-0.0343671	0	0	0	0	0	0	0	0	0	0	0	0
SGN-U224723		0	0	0	0	0	0	0	0	0	0	0	0	0	0	0	0	0	0	0	0	0	0	0	0	0	0	0	0	0	0	0	0	0	0	0	0	0	0	0	0	0	0	0	0	0	0	0	0
SGN-U224469	SGN-U318850	0	0	-0.0594888	0	0	0	0	0	0	0	0.117049	0	0	0	0.00223673	0	0	0	0	0	0	0	0	0	0	0	0	0	0	0	0	0	0	0	0	0	0	0	0	0	0	0	0	0	0	0	0	0
SGN-U225547	SGN-U314256	0	0	0	0	0	0	0	0	0	0	0	0	0	0	0	0	0	0	0	0.255136	0	0	0	0	0	0	0	0	0	0	0	0.215823	0	0	0	0.0151433	0	0	0	0	0	0	0	0	0	0	0.103323	0
SGN-U236001		0	0	0	0	0	0	0	0	0	0	0	0	0	0	0	0	0	0	0	0	0	0	0	0	0	0	0	0	0	0	0	0	0	0	0	0	0	0	0	0	0	0	0	0	0	0	0	0
SGN-U222097	SGN-U324058	0	0	0	0	0	0	0	0	0	0	0	0	0	0	0	0	0	0	0	0	0	0	0	0	0	0	0	0	0	0	0	0	0	0	0	0	0	0	0	0	0	0	0	0	0	0	0	0
SGN-U217919	SGN-U317038	0	0	0	0	-0.0461818	0	0	0	0	0	0	0	0	0	0	0	0	0	0	0	0	0	0	0	0	0	0	0	0	0	0	0	0	0	0	0	0	0	0	0	0	0	0	0	0	0	0	0
SGN-U222729	SGN-U324934	0	0	0	0	-0.0474542	0	0	0	0	0	0	0	0	0	0	0	0	0	0	0	0	0	0	0	0	0	0	0	0	0	0	0	0	0	0	0	0	0	0	0	0	0	0	0	0	0	0	0
SGN-U220938	SGN-U323749	0	0	0	0	0	0	0	0	0	0	0	0	0	0	0	0	0	0	0	0	0	0	0	0	0	0	0	0	0	0	0	0	-0.165087	0	0	0	0	0	0	0	0	0.124321	0	-0.085369	0	0	0	0
SGN-U226937	SGN-U326325	0	0	0	0	0	0	0	0	0	0	0	0	0	0	0	0	0	0	0	0	0	0	0	0	0	0	0	0	0	0	0	0	0	0	0	0	0	0	0	0	0	0	0	0	0	0	0	0
SGN-U220855	SGN-U322139	0	0	0	0	0	0	0	0	0	0	0	0	0	0	0.0342723	0	0	0	0	0	0	0	0	0	0	0	0	0	0	0.0386262	0	0	0	0	0	0	0	0	0	0	0.288317	0	0	0	0	0	0	0
SGN-U213178		0	0	0	0	0	0	0	0	0	0	0	0	0	0	0	0	0	0	0	0	0.0569179	0	0	0	0	0	0	0	0	0.0327106	0	0	0	0	0	0	0	0	0	0	0	0	0	0	0	0	0	0
SGN-U220875	SGN-U322899	0	0	0	0	0	0	0	0	0	0	0	0	0	0	0	0	0	0	0	0	0	0	0	0	0	0	0	0	0	0	0	0	0	0	0	0	0	0	0	0	0	0	0	0	0	0	0	0
SGN-U217137	SGN-U318035	0	0	0	0	0	0	0	0	0	0	0	0	0	0	0	0	0	0	0	0	0	0	0	0	0	0	0	0	0	0	0	0	0	0	0	0	0	0	0	0	0	0	0	0	0	0	0	0
SGN-U228269	SGN-U329064	0	0	0	0	0	0	0	0	0	0	0	0	0	0	0	0	0	0	0	0	0	0	0	0	0	0	0	0	0	0	0	0.0135173	0	0	0	0	0	0	0	0	0	0	0	0	0	0	0	0
SGN-U214106	SGN-U314046	0	0	0	0	0	0	0	0	0	0	0	0	0	0	0	0	0	0	0	0	0	0	0	0	0	0	0	0	0	0	0	0	0	0	0	0	0	0	0	0	0.160301	0	0	0	0	0	0	0
SGN-U236260	SGN-U333305	0	0	0	0	0	0	0	0	0	0	0	0	0	0	0	-0.0697128	0	0	0	0	0	0	0	0	0	0	0	0	0	0	0	0	0	0	0	0	0	0	0	0	0	0	0	0	0	0	0	0
SGN-U230612		0	0	0	0	0	0	0	0	0	0	0	0	0	0	0	0.208564	0	0	0	0	0	0	0	0	0	0	0	0	0	0	0	0	0	0	0	0	0	-0.103266	0	0	0	0	0	0	-0.0691512	0	0	0
SGN-U231632	SGN-U319978	0	0	0	0	0	0	0	0	0	0	0	0	0	0	0	0	0	0	0	0	0	0	0	0	0	0	0.181721	-0.147399	0	0	0	0	0	0	0	0	0	0	0	0	0	0	0	0	0	0	0	0
SGN-U236515	SGN-U342906	0	0	0	0	0	0	0	0	0	0	0	0	0	0	0	0	0	0	0	0	0	0	0	0	0.151865	0	0	0	0	0	0	0	0	0	0	0	0	0	0	0	0	0	0	0	0	0	0	0
SGN-U215619	SGN-U316325	0	0	0	0	0	0	0	0	0	0	0	0	0	0	0	0	0	0	0	0	0	0	0	0	0	0	0	0	0	0	0	0	0	0	0	0	0	0	0	0	0	0	0	0	0	0	0	0
SGN-U214499	SGN-U315570	0	0	0	0	0	0	0	0	0	0	0	0	0	0	0	-0.0890511	0	0	0	0	0	0	0	0	0	0	0	0	0	0	0	0	0	0	0	0	0	0	0	0	0	0	0	0	0	0	0.0513708	0
SGN-U223834	SGN-U325107	0	0	0.0131877	0	0	0	0	0	0	0	0	0	0	0	0	0	0	0	0	0	0	0	0	0	0	0	0	0	0	0	0	0	0	0	0	0	0	0	0	0	0	0	0	0	0	0	0	0
SGN-U215229	SGN-U316401	0	0	0	0	0.162512	0	0.0533352	0	0	0	0	0	0	0	0	0.0117487	0	0	0	0	0	0.0171918	0	0	0	0	0	0	0	0	0	0	0.130799	0	0	0	0	0	0	0	0.0689496	0	0	0	0	0	0	0.128236
SGN-U223128	SGN-U318255	0	0	0	0	0	0	0	0	0	0	0	0	0	0	0	0	0	0	0	0	0	0	0	0	0	0.0135225	0	0	0	0	0	0	0	0	0	0	0	0	0	0	0	0	0	0	0	0	0	0
AJ002281	AJ002281	0	0	0	0	0	0	0	0	0	-0.0492311	0	0	0	0	0	0	0	0	0	0	0	0	0	0	0	0	0	0	0	0	-0.0175803	0	0	0	0	0	0	0	0	0	0.169165	0	0	0	0	0	0	0
SGN-U235796	SGN-U330845	0.233205	0	0	0	0	0	0	0	0	0	0	0	0	0	0	0	0	0	0	0	0	0	0	0	0	0	0	0	0	0	0	0	0	0	0	0	0	0	0	0	0	0	0	0	0	0	0	0
SGN-U219482	SGN-U322409	0	0	0	0	0	0	0	0	0	0	0	0	0	0	0	0	0	0	0	0	0	0	0	0	0	0	0	0	0	0	0	0	0	0	0	0	0	0	0	0	0	0	0	0	-0.028744	0	0	0
SGN-U216449	SGN-U317247	0	0	0	0	0	0	0.0217469	-0.0403634	0	0	0	0	0	0	0	0	0	0	0	0	0	0	0	0	0	0	0	0	0	0	0	0	0	0	0	0	0	0	0	0	0	0	0	0	0	0	0	0
SGN-U219519		0	0	0	0	0	0	0	0	0	0	0	0	0	0	0	0	0	0	0	0	0	0	0	0	0	0	0	0	0	0	0	0	0	0	0	0	0	0	0	0	0	0	0	0	0	0	0	0
SGN-U213323	SGN-U313209	0	0	0	0	0	0	-0.029953	0	0	0	0	0	0	0	0	0	0	0	0	0	0	0	0	0	0.071928	0	0	0	0	0	0	0	0	0	0	0	0	0	0	0	0	0	0	0	0	0	0	0
SGN-U215031		0	0	0	0	0	0	0	0	0	0	0	0	0	0	0	0	0	0	0	0	0	0	0	0	0	0	0	0	0	0	0	0	0	0	0	0	0	0	0	0	0	0	0	0	0	0	0	-0.0832786
SGN-U219811	SGN-U322016	0	0	0	0	0	0	0	0	0	0	0	0	0	0	0	0	0	0	0	-0.07947	0	0	0	0	0	0	0	0	0	0	0	0	0	0	0	0	0	0	0	0	0	0	0	0	0	0	0	0
SGN-U216590	SGN-U322191	0	0	0	0	0	0	0	0	0	0	0	0	0	0	0	0	0	0	0	0	0	0	0.0921476	0	0	0	0	0	0	0	0	0	0	0	0	0	0	0	0	0	0	0	0	0	0	0	0	0
SGN-U224152		0	0	0	0	0	0	0	0	0	0	0	0	0	0	0	0	0	0	0	0	0	0	0	0	0	0	0	0	0	0	0	0	0	0	0	-0.153649	0	-0.00980547	0	0	-0.139738	0	0	0	0	0	0	0
SGN-U214406	SGN-U315138	0	0	0	0	0	0	0	0	0	0	0	0	0	0	0	0	0	0	0	0	0	0	0	0	0	0	0	0	0	0	0	0	0	0	0	0	0	0	0	0	0	0	0	0	0	0	0	0.0770519
SGN-U221381	SGN-U323787	0	0	0	0	0	0	0	0	0	0	0	0	0	0	0	0	0	0	0	0	0	0	0	0	0	0	0	0	0	0	0	0	0	0	0	0	0	0	0	0	0	0	0	0	0	0	0	0
SGN-U226566	SGN-U323602	0	0	0	0	0	0	0	0	0	0	0	0	0	0	0	0	0	0	0	0	0	0	0	0	0	0	0	0	0	0	0	0	0	0	0	0	0	0	0	0	0	0	0	0	0	0	0	0
SGN-U218812	SGN-U319158	0	0	0	0	0	0	0	0	0	0	0	0	0	0	0	0	0	0	0	0	0	0	0	0	0	0	0	0	0	0	0	0	0	0	0	0	0	0	0	0	0	0	0	0	0	0	0	0
SGN-U227967	SGN-U325380	0	0	0	0	0	0	0	0	0	0	0	0	0	0.123445	0	0	0	0	0	0	0	0	0	0	0	0	0	0	0	0	0	0	0	0	0	0	0	0	0	0	0	0	0	0	0	0.0768475	0	0
SGN-U228202	SGN-U332427	0	-0.0881416	0	0	0.146826	0	0	0	0	0	0	0	0	0	0	0	0	0	0	0	0	0	0	0	0	0	0	0	0	0	0	0	0	0	0	0	0	0	0	0	0	-0.119503	0	0	0	0	0	0
SGN-U232645	SGN-U334677	0	0	0	0	0	0	0	0	0	0	0	0	0	0	0	0	0	0	0	0	0	0	0	0	0	0	0	0	0	0	0	0	0	0	0	0	0	0	0	0	0	0	0	0	0	0	0	0
SGN-U216025	SGN-U317773	0	0	0	0	0	0	0	0	0	0	0	0	0	0	-0.0406167	0	0	0	0	0	0	0	0	0	0	0	0	0	0	0	0	0	0	0	0	0	0	0	0	0	0	0	0	0	0	0	0	0
SGN-U227239		0	0	0	0	0	0	0	0	0	0	0	0	0	0.0733209	0	0	0	0	0	0	0	0	0	0	0	0	0	0	0	0	0	0	0	0	0	0	0	0	0	0	0	0	0	0	0	0	0	0
SGN-U218097	SGN-U320227	0	0	0	0	0	0	0	0	0	0	0	0	0	0.0853168	0	0	0	0	0	0	0	0	0	0	0	0	0	0	0	0	0	0	0	0	0	0	0	0	0	0	0	0	0	0	0	0	0.135731	0
SGN-U213341	SGN-U312911	0	0	0	0	0	0	0	0	0	0	0	0	0	0	0	0	0	0	0	0	0	0	0	0	0	0	0	0	0	0	0	0	0	0	0	0	0	0	0	0	-0.0624137	0	0	0	0	0	0	0
SGN-U218016	SGN-U318912	0	0	0	0	0	0	0	0	0	0	0	0	0	0	0	0	0	0	0	0	0	0	0	0	0	0	0	0	0	0	0	0	0	0	0	0	0	0	0	0	0	0.193956	0	0	0	0	0	0
SGN-U216356	SGN-U312749	0	0	0	0	0	0	0	0	0	0	0	0	0	0	0	0	0	0	0	0	0	0	0	0	0	0	0	0	0	0	0	0	0	0	0	0	0	0	0.395368	0	0	0	0	0	0	0	0	0
SGN-U223851	SGN-U323861	0	0	0	0	0	0	0	0	0	0.0758789	0.00944959	0	0.00199953	0	0	0	0	0	0	0	0	0	0	0	0	0	0.0508117	0	0	0	0	0	0	0	0	0	0	0	0	0	0	0	0	0	0	0	0	0
SGN-U217933	SGN-U320026	0	0	0	0	0	0	0	0	0	0	0	0	0	0	0	0	0	0	0.123755	0	0	0	0	0	0	0	0	0	0	0	0	0	-0.0225378	0	0	0	0	-0.0163251	0	0	0	0	0	0	0	0	0	0
SGN-U215545	SGN-U315800	-0.0484353	0	0	0	0	0	0	0	0	0.00442848	0	0	0	0	0	0	0	0	0	0	0	0	0	0	0	0	0	0	0	0	0	0	0	0	0	0	0	0	0	0	0	0	0	0	0	0	0	0
SGN-U226856	SGN-U329844	0	0	0	0	0	0	0	0	0	0	0	0	0	0	0	0	0	0	0	0	0	0	0	0	0	0	0	0	0	0	0	0	0	0	0	0	0	0	0	0	0	0	0	0	0	0	0	0
SGN-U216488	SGN-U318196	0	0	0	0	0	0	0	0	0	0	0	0	0	0	0	0	0	0	0	-0.0389958	0	0	0	0	-0.0910726	0	0	0	0	0	0	0	0	0	0	0	0	0	0	0	0	0	0	0	0	0	0	0
SGN-U217359	SGN-U318467	0	0	0	0	0	0	0	0.167143	0	0	0	0	0	0	0	0	0	0	0	0	0	0	0	0	0	0	0	-0.121053	0	0	0	0	0	0	0	0	0	0	0	0	0	0	0	0	0	0	0	0
SGN-U218646	SGN-U318736	0	0	0	0	0	0	0	0	0	0	0	0	0	0	0	0	0	0	0	0	0	0	0	0	0	0	0	0	0	0	0	0	0	0	0	0	0	0	0	0	0	0	0	0	0	0	0	0
SGN-U223646	SGN-U320091	0	0	0	0	0	0	0	0	0	0	0	0	0	0	0	-0.138409	0	0	0	0	0	0	0	0	0	0	0	0	0	0	0	0	0	0	0	0	0	0	0	0	0	0	0	0	0	0	0	0
SGN-U216427	SGN-U317705	0	0	0	0	0	0	0	0	0	0	0	0	0	0	0	-0.290303	0	0	0	0	0	0	0	0	0.0758506	0	0	0	0	0	0	0	0	0	0	0	0	0	0	0	0	0	0	0	0	0	0	0
SGN-U235586	SGN-U346847	0	0	0	0	0	0.0292054	0	0	0	0	0	0	0	0	0	0	0	0	0	0	0	0	0	0	0	0	0	0	0	0	0	0	0	0	0	0	0	0	0	-0.0224246	0	0	0	0	0	0	0	0
SGN-U230512	SGN-U331682	0.100597	0	-0.027722	0	0	0	0	0	0	0	0	0	0	0	0	0	0	0	0	0	0	0	0	0	0	0	0	0	0	0	0	0	0	0	0	0	0	0	0	0	-0.0186639	0	0	0	0	0	0	0
SGN-U229617	SGN-U332420	0	0	0	0	0	0	0	0	0	0	0	0	0	0	0	0	0	0	0	0	0	0	0	0.0121446	0	0	-0.0747749	0	0	0	0	0	0	0	0	0	0	0	0	0	0	0	0	0	0	0	0	0
SGN-U220526	SGN-U322449	-0.14005	0	0	0.191474	0	0	0	0	0	0	0	0	0	0	0	0	0	0	0	0	0	-0.0639339	0	0	0	0	0	0	0	0	0	0	0	0	0	0	0	0	0	0	0	0	0	0	0	0	0	0
SGN-U219528	SGN-U322486	0	0	0	0	0	0	0	0	0	0	0	0	0	0	0	0	0	0.000631156	0	0	0	0	0	0	0	0	0	0	0	0	0	0	0	0	0	0	0	0	0	0.0079055	0	0	0	0	0	0	0	0
SGN-U217777	SGN-U319153	0	0	0	0	0	0	0	0	0	0	-0.173957	0	0	0	0	0	0	0	0.149995	0	0	0	0	0	0	0	0	0	0	0	0	0	0	0	0	0	0	0	0	0	0	0	0	0	0	0	0	0
SGN-U214088	SGN-U313986	0	0	0	0	0	0	0	0	0	0	0	0	0	0	0	0	0	0	0	0	0	0	0	0	0	0	0	0	0	0	0	0	0	0	0	0	0	0	0	0	0	0	0	0	0	0	0	0
SGN-U215765	SGN-U315478	0	0	0	0	0	0	0	0	0	0	0	0	0	0	0	0	0	0	0	0	0	0	0	0	0	0	0	0	0	0	0	0	0	0	0	0	0	0	0	0	0	0	0	0	0	0	0	0
SGN-U218589	SGN-U320090	0	0	0	0	0	0	0	0	0	0	0	0	0.397809	0	0	0	0	0	0	0	0.076433	0	0	0.351119	0	0	0	0	0	0	0	0	0	0	0	0	0	0	0	0	0	0	0	0	0	0	0	0
SGN-U217938	SGN-U319799	0	0	0	0	0	0	0	0	0	0	0	0	0	0	0	0	0	0	0	0	0	0	0	0	0	0	0	0	0	0	0	0	0	0	0	0	0	0	0	0	0	0	0	0	0	0	0	0
SGN-U226795	SGN-U328962	0	0	0	0	0	0	0	0	0	0	0	0	0	0	0.157331	0	0	0	0	0	0	0	0	0	0	0	0	0	0	0	0	0	0	-0.0281427	0	0	0	0	0	0	0	0	0	0	0	0	0	0
SGN-U215773	SGN-U317136	0	0	0	0	0	0	0	0	0	0	0	0	0	0	0	0	0	0	0	0	0	0	0	0	0	0	-0.158777	0	0	0	0	0	0	0	0	0	0	0	0	0	0	0	0	0	0	0	0	0
SGN-U218502	SGN-U316803	-0.0451114	0	0	0	0	0	0	0	0	0.0169596	0	0	0	0	0	0	0	0	0	0	0	0	0	0	0	0	0	0	0	0	0	0	0	0.195022	0	0	0	0	0	0	0	0	0	0.0407153	0	0	0	0
SGN-U218240		0	0	0	0	0	0	0	0	0	0	0	0	0	0	0	0	0	0	0	0	0	0	0	0	0	0	0	-0.205447	0	0	0	0	0	0	0	0	0	0	0	0	0	0	0	0	0	0	0	0
SGN-U219992		0	0	0	0	0	0	0	0	0	0	0	0	0	0	0	0	0	0	0	0	0	0	0	0	0	0.146825	0	0	0	-0.100498	0	0	0	0	0	0	0	0	0	0	0	0	0	0	0	0	0	0
SGN-U217621	SGN-U319267	0	0	0	0	0	0	0	0	-0.216074	0	0	-0.411308	0	0	0	0	0	0	0	0.224108	0	0	0	0	0	0	0	0	0	0	-0.0866432	0	0	0	0	0	0	0	0	0	0	-0.0491513	0	0	0	0	0	0.300177
SGN-U220271	SGN-U322000	0	0	0	0	0	0	0	0	0	0	0	0	0	0	0	0	0	0	0	0	0	0	0	0	0	0	0	0	0	0	0	0	0	0	0	0	0	0	0	0	0	0	0	0	0	0	0	0
SGN-U223813	SGN-U327259	0	0	0	0	0	0	0	0	0	0	0	0	0	0	0	0	0	0	0	0	0	0	0	0	0	0	0	0	0	0	0	0	0	0	0	0	0	0	0	0	0	0	0	0	0	0	0	0
SGN-U226473	SGN-U325595	0	0	0	0	0	0	0	0	0	0	0	0	0	0	0	0	0	0	0	0	0	0	0	0	0	0	0	0	0	0	0	0	0	0	0	0	0	0	0	0	0	0	0	0	0	0	0	0
SGN-U226032	SGN-U325896	0	0	0	0	0	0	0	0	0	0	0	0	0	0	0	0	0	0	0	0	0	0	0	0	0	0	0	0	0	0	0	0	0	0	-0.0691869	0	0	0	0	0	0	0	0	0	0	0	0.0780276	0
SGN-U214072	SGN-U314996	0	0	0	0	0	0	0	0	0	0	0	0	0	0	0	0	0	0	0	0	0	0	0	0	0	0	0	0	0	0	0	0	0	0	0	0	0	0	-0.144063	0	0	0	0	0	0	0	0	0
SGN-U216789		-0.00898714	0	0	0	0	0	0	0	0	0	0	0	0	0	0	0	0	0	0	0	0	0	0	0	0	0	0	0	0	0	0	0	0	0	0	0	0	0	0	0	0	0	0	0	0	0	0	0
SGN-U226873	SGN-U324520	0	0	0	0	0	0	0	0	0	0	0	0	0	0	0	0	0	0	0	0	0	0	0	0	0	0	0	0	0	0	0	0	0	0	0	0	0	0	0	0	0	0	0	0	0	0	0	0
SGN-U218600	SGN-U320076	0	0	0	0	-0.0751098	0	0	0	0	0	0	0	0	0	0	0	0	0	0	0	0	0	0	0	0	0	0	0	0	0	0	0	0	0	0	0	0	0	0	0	0	0	0	0	0	0.0278314	0	0
SGN-U231471		0	0	0	0	0	0	0	0	0	0	0	0	0	0	0	0	0	0	0	0	0	0	0.304736	0	0	0	0	0	0	0	0	0	0	0	0	0	0	0	0	0	0	0	0	0	0	0	0	0
SGN-U221459	SGN-U321667	0	0	0	0	0	0	0	0	0	0	0	0	0	0	0	0	0	0	0	0	0	0	0	0	0	0	0	0	0	0.200641	0	0	0	0	0	0	0	0	0	0	0	0	0	0	0	0	0	0
SGN-U227429		0	0	0	0	-0.115278	0	0	0	0	0	0	0	0	0	0	0	0.0345241	0.00423183	0	0	-0.0445549	0	0	0	0	0	0	0	0	0	0	0	0	0	0	0	0	0	0	0	0	0	0	0	0	0	0	0
SGN-U227152		0	0	0	0	0	0	0	0.0441138	0	0	0	0	0	0	0	0	0	0	0	0	0	0	0	0	0	0	0	0	0	0	0	0	0	0	0	0	0	0	0	0	0	0	0	0	0	0	0	0
SGN-U212974	SGN-U314621	0	0	0	0	0	0	0	0	0	0	0	0	0	0	0	0	0	0	0	0	0	0	0	0	0	0	0	0	0	0	0	0	0	0	0	0	0	0	0	0	0	-0.0715998	0	0	0	0	0	0
SGN-U226069	SGN-U324984	0	0	0	0	0	0	0	0	0	0	0	0	0	0	0	0	0	0	0	0	0	0	0	0	0	0	0	0	0	0	0	0	0.0250707	0	0	0	0	0	0	0	0	-0.142155	0	0	0	0.00448891	0	0
SGN-U224697		0	0	0	0	0	0	0	0	0	0	0	0	0	0	0	0	0	0	-0.181713	0	0	0	0	0	0	0	0	0	0	0	0	0	0	0	0	0	0	0	0	0	0	0	0	0	0	0	0	0
SGN-U214951		0	0	0	0	0	0	0	0	0	0	0	0	0	0	0	0	0	0	0	0	0	0.0256502	0	0	0	0	0	0	0	0	0	0	0	0	0.151055	0	0	0	0	0	0	0	0	0	0	0	0	0
SGN-U219428	SGN-U321098	0	0	0	0	0	0	0	0	0	0.0596473	0	0	0.362303	0	0	0	0	0	0	0	0	0	0	0	0	0	0	0	0	0	0	0	0	0	0	0	0	0	0	0	0	0	0	0	0	0	0	0
SGN-U215581		0	0	0	0	0	0	0	0	0	0	0	0	0	0	0	0	0	0	0	0	0	0	0	0	0	0	0	0	0	0	0	0	0	0	0	0	0	0	0	0	0	0	0	0	0	0	0	0
SGN-U231357	SGN-U330446	0	0	0	0	0	0.0113596	0	0	0	0.0917292	0	0	0	0	0	0	0	0	0	0	0	0	0	0	0	0	0	0	0	0	0	0	0	0	0	0	0	0	0	0	0	0	0	0	0	0	0	0
SGN-U219912		0	0	0	0	0	0	0	0	0	0	0	0	0	0	0	0	0	0	0	0	0	0	0	0	0	0	0	0	0	0	0	0	0	0	0	0	0	0	0	0	0	0	0	0	0	0	0	0
SGN-U240216	SGN-U324293	0	0	0	0	0	0	0	-0.0281135	0	0	0	0	0	0	0	0	0	0	0	0	0	0	-0.00622797	0	0	0	-0.124584	0	0	0	0	0	0	0	0	0	0	0	0.0722605	0	0	0	0	0	0	0	0	0
SGN-U217320	SGN-U319140	0	0	0	0	0	0	0	0	0	0	0	0	0	0	0	0	0	0	0	0	0	0	0	0	0	0	0	0	0	0	0	0	0	0	0	0	0	0	0	0	0	0	0	0	0	0	0	0
SGN-U216202	SGN-U317861	0	0	0	0.0634404	0	0	0	0	0	0	0	0	0	0	0	0	0	0	0	0	0	0	0	0	0	0	0	0	0	0	0	0	0	0	0	0	0	0	0	0	0.0270036	0	0	0	0	0	0	0
SGN-U219849	SGN-U322245	0	0	0	0	0	0	0	0	0	0	0	0	0	0	0	0	0	0	0	0	0	0	0	0	0	0	0	0	0	0	0	0	0	0.0175011	0	0	0	0	0	0	0	0	0	0	0.224348	0	0	0
SGN-U217775	SGN-U317754	0	0	0	0	0	0	0	0	0	0	0	0	0	0	0	0	0	0	0	0	0	0	0	0	0	-0.138103	0	0	-0.0702698	0	0	0	0	0	0	0	0	0	0	0	0	0	0	0	0	0	0	0
SGN-U226579	SGN-U314085	0	0	0	0	-0.0454026	0	-0.00473884	0	0	0	0	0	0	0	0	0	0	0	0	0	0	0	0	0	0	0	0	0	0	0	0	0	0	0	0	0	0	0	0	0	0	0	0	0	0	0	0	0
SGN-U219297	SGN-U320248	0	0	0	0	0	0	0	0	0	0	0	0	-0.082881	0	-0.0535483	0	0	0	0	0	0	0	0	0	0	-0.0611774	-0.164705	0	0	0	0	0	0	0	0	0	0	0	0	0	0	0	0	0	0	0	0	0
SGN-U216470		0	0	0	0	0	0	0	0	0	0	0	0	0	0	0	0	0	0	0	0	0	0	0	0	0	0	0	0	0	0	0	0	0	0	0	0	0	0	0	0	0	0	0	0	0	0	0	0
SGN-U217758	SGN-U318645	0	0.0410897	0	0	0.143365	0	0	0	0	0	0	0	0	0	0	0	0	0.361659	0	0	0	0	0	0	0	0	0	0	0	0	0	0	0	0	0	0	0	0.0979693	0	0	0	0	0	0	0	0	0	0.0142956
SGN-U222961	SGN-U319693	0	0	0	0	0	0	0	0	-0.0160295	0	0	0	0	0	0	0	0	0	0	0	0	0	0	0	0	0	0	0	0	0	0	0	0	0	0	0	0	0	0	0	0	0	0	0	0	0	0	0
SGN-U217799	SGN-U317802	0	0	0	0	0	0	0	0	0	0	0	0	0	0	0	0	0	0	0	0	0	0	0	0	0	0	0	0	0	0	0	0	0	0	0	0.00412432	0	0	0	0	0	0	0	0	0	-0.0156781	0	0
SGN-U213805	SGN-U313490	0	-0.140792	0	0	0	0	0	0	0	0	0	0	0	0	0	0	0	0	0	0	0	0	0	0	0	0	0	0	0	0	0	0	0	0	0	0	0	0	0	0	0	0	0	0	0	0	0	0
SGN-U213146	SGN-U312920	0	0	0	0	0	0	0	0	0	0	0	0	0	0	0	0	0	0	0	0	0	0	0	0	0	0	0	0	0	0	0	0	0	0	0	0	0	0	0	0	0.0123956	0	0	0	0	0	0	0
SGN-U213680	SGN-U313784	0	0	0	0	0	0	0	0	0	0	0	0	0	0	0	0	0	0	0	0	0	0	0	0	0	0	0	0	0	0	0	0	0	0	0	0	0	0	0	0	0	0	0	0	0	0	0	0
SGN-U222850	SGN-U319641	0	0	0	0	0	0	0	0	0	0	0	0	0	0	0	0	0	0	0	0	0	0	0	0	0	0	0	0	0	0	0.157701	0	0	0	0	0	0	0	0	0	0	0	0	0	0	0	0	0
SGN-U213807	SGN-U313513	0	0	0	0	0	0	0	0	0	0	0	0	0	0	0	0	0	0	0	0	0	0	0	0	0	0	0	0	0	0	0	0	0	0	0	0	0	0	0	0	0	0	0	0	0	0	0	0
SGN-U218621	SGN-U319428	0	0	0	0	0.0185075	0	0	0	0	0	0	0	0	0	0	0	0	0	0	0	0	0	0	0	0	0	0	0	0	0	0	0	0.0394904	0	0	0	0	0	0	0	0	0	0	0	0	0	0.0258176	0
SGN-U214902	SGN-U316224	0	0	0	0	0	0	0	0	0	0	0	0	0	0	0	0	0	0	0	0	0	0	0	0	0	0	0	0	0	0	0	0	0	0	0	0	0	0	0	0	0	0	0	0	0	0	0	0
SGN-U213725	SGN-U312510	0	0	0	0	0	0	0	0	0	0	0	0	0	0	0	0	0	0	0	0	0	0	0	0	0	0	0	0	0	0	0	0	0	0	0	0	0	0	0	0	0	0	0	0	0	0	0	0
SGN-U214610	SGN-U315818	0	0	0	0	0	0	0	0	0	0	0	0	0	0	0	0	0	0	0	0.0215796	0	0	0	0	0	0	0	0	0	0	0	0	0	0	0.219527	0	0	0	0	0	0	0	0	0	0	0	0	0
SGN-U215228	SGN-U315808	0	0	0	0	0	0	0	0	0	-0.00156952	0	0	0	0	0	0	-0.0857829	0	0	0	0	0	0	0	0	0	0	0	0	0	0	0	0	0	0	0	0	0	0	0	0	0	0	0	0	0	0	0
SGN-U216118		0	0	0	0	0	0	0	0	0	0	-0.0804195	0	0	0	0	0	0	0	0	0	0	0	0	0	0	0.0600617	0	0	0	0	0	0	0	0	0	0	0	0	0	0	0	0	0	0	0	0	0	0
SGN-U226193	SGN-U326775	0	0	0	0	0	0	0	0	0	0	0	0	0	0	0	0	0	0	0	0	0	0	0	0	0	0	0	0	0	0	0	0	0	0	0	0	0	0	0	0	0	0	0	0	0	0	0	0
SGN-U216034	SGN-U316806	0	0	0	0	0	0	0	0	0	0	0	0	0	0	0	0	0	0	0	0	0	0	0	0	0	0	0	0	0	0	0	0	0	0	0	0	0	0	0	0	0	0	0	0	0	0	0	0
SGN-U226136	SGN-U329137	0	0	0	0	0	0	0	0	0	0	0	0	0	0	0	0	0	0	0	0	0	0	0	0	0	0	0	0	0	0	0	0	0	0	0	0	0	0	0	0	0	0	0	0	0	0	0	0
SGN-U217805	SGN-U319677	0	0	0	0	0	0	0	0	0	0	0.30742	0	0	0	0	0	0	0	0	0	0	0	0	0	0	0	0	0	0	0	0	0	0	0	0	0	0	0	0	0	0	0	0	0	0	0	0	0
SGN-U218348	SGN-U319846	0	0	0	0	0	0	0	0	0	0	0	0	0	0	0	0	0	0	0	0	0	0	0	0	0	0	0	0	0	0	0	0	0	0	0	0	0	0	0	0	0	0	0	0	0	0	0	0
SGN-U221379	SGN-U324439	0	0	0	0	0	0	0	0.0402656	0	0	0	0	0.0743196	0	0	0	0	0	0	0	0	0	0	0	0	0	0	0	0	0	0	0	0	0	0	0	0	0	0	0	-0.0641379	0	0	0	0	0	0	0
SGN-U216644	SGN-U335584	0	0	0	0	0	0	0	0	0	0	0	0	0	0	0	0	0	0	0	0	0	0	0	0	0	0	0	0	0	0	0	0	0	0	0	0	0	0	0	0	0	0	0	0	0	0	0	0
SGN-U217023	SGN-U318047	0	0	0	0	0	0	0	0	0	0	0	0	0	0	0	0	0	0	0	0	0	0	0	0	0.0632736	0	0	0	0	0	0	0	0	0	0	0	-0.0124313	0	0	0	0	0	0	0	0	0	0	0
SGN-U216380	SGN-U318149	0	0	0	0	0	0	0	0	0	0	0	0	0	0	0	0	0	0	0	0	0	0	0	0	0	0	0	0	0	0.0647399	0	0	0	0	0	0	0	0	0	0	0	0	0	0	0	0	0	0
SGN-U214856	SGN-U315271	0	0	0	0	0	0	0	0	0	0	0	0	0	0	0	0	0	0	0	0	0	0	0	0	0	0	0	0	0	0	0	0	0	0	0	0	0	0	0	0	0	0	0	0	0	0	0	0
SGN-U215759	SGN-U317563	0	0	0	0	0	0	0	0	0	0	0	0	0	0	0	0	0	0	0	0	0	0	0	0	0	0	0	0	0	0	0	0	0	0	0	0	0	0	0	0	0	0	0	0	0	0	0	0
SGN-U218428	SGN-U320902	0	0	0	0	0	0	0	0	0	0	0	0	0	0	0	0	0	0	0	0	0	0	0	0	0	0	0	0	0	0	0	0	0	0	0	0	0	0	0	0	0	0	0	0	0	0	0	0
SGN-U217812	SGN-U319331	0	0	0	0	0	0	0	0	0	0	0	0	0	0	0	0	0	0	0	0	0	0	0	0	0	0	0	0	0	0	0	0	0	0	0	0	0	0	0	0	0	0	0	0	0	0	0	0
SGN-U216279	SGN-U317840	0	0	0	0	0	0	0	0	0	0	0	0	0	0	0	0	0	0	0	0	0	0	0	0	0	0	0	0	0	0	0	0	0	0	0	0	0	0	0	0	0	0	0	0	0	0	0	0
SGN-U217859	SGN-U318629	0	0	0	0	0	0	0	0	0	0	0	0	0	0	0	0	0	-0.141981	0	0	0	0	0	0	0	0	0	0	0	0	0	0	0	0	0	0	0	0	0	0	0	0	0	0	0	0	0	0
SGN-U228493		0	0	0.00722009	0	0	0	0	0	0	0	0	0	0	0	0	0.259844	0	0	0	0	0	0	0	0	0	0	0	0	0	0	0	0	0	0	0	0	0	0	0	0	0	0	0	0	0	0	0	0
SGN-U230300	SGN-U332517	0	0	0	0	0	0	0	0	0	0	0	0	0	0	0	0	0	0	0	0	0	0	0	0	0	0	0	0	0	0	0	0	0	0	0	0	0	0	0	0	0	0	0	0	0	0	0	0
SGN-U217031	SGN-U318343	0	0	0	0	0	0	0	0	0	0	0	0	0	0	0	0	0	0	0	0	0	-0.0191971	0	0	0	0.131063	0	0	0	0	0	0	0	0	0	0	0	0	0	0	0	0	0	0	0	0	0	0
SGN-U213626	SGN-U315422	0	0	0	0	0	0	0	0	0	0	0	0	0	0	0	0	0	0	0	0	0	0	0	0	0	0	0	0	0	0	0	0	0	0	0	0	0	-0.0413827	0	0	0	0	0	0	0	0	0	0
SGN-U215845	SGN-U317214	0	0	0	0	0	0	0	-0.00488894	0	0	0	0	0	0	0	0	0	0	0	0	0	0	0	0	0	0	0	0	0	0	0	0	0	0	0	0	0	-0.134112	0	0	0	0	0.228074	0	0	0	0	0
SGN-U215369	SGN-U313839	0	0	0	0	0	0	0	0	0	0	0	0	0	0	0	0	0	0	0	0	0	0	0	0	0	0	0	0	0	0	0	0	0	0	0.0681662	0	0	0	0	0	0	0	0	0	0	0	0	0
SGN-U224412	SGN-U326863	0	0	0	0	0	0	0	0	0	0	0	0	0	0	0	0	0	0	0	0	0	0	0	0	0	0	0	0	0	0	0	0	0	0	0	0	0	0	0	0	0	0	0	0	0	0	0	0
SGN-U213383	SGN-U314859	0	0	0	0	0	0	0	0	0	0	0	0	0.0726053	0	0	0	0	0	0	0	0	0	0	0	0.0454098	0	0	0	0	0	0	0	0	0	0	0	0	0	0	0	0	0	0	0	0	0	0	0
SGN-U231725	SGN-U327192	0	0	0	0	0	0	0	0	0	0	0	0	0	0	0	0	0	0	0.00421174	0	0	0	0	0.3312	0	0	0	0	0	0	0	0	-0.333325	0	0	0	0	0	0	0	0	0	0	0	0	0	0	0
SGN-U218343	SGN-U320295	0	0	0	0	0	0	0	0	0	0	0	0	0	0	0	0	0	0.0512086	0	0	0	0	0	0	-0.0653922	0	0	0	0	0	0	0	0	0	0	0	0	0	0	0	0	0	0	0	0	0	0	0
SGN-U214986	SGN-U316243	0	0	0	0	0	0	0	0	0	0	0	0	0	0	0	0	0	0	0	0	0	0	0	0	0	0	0.162746	0	0	0	0	0	0	0	0	0	0	0	0	0	0	0	0	0	0	-0.0624934	0	0
SGN-U214077	SGN-U314048	0	0	0	0	0	0	0	0	0	0	0	0	0	0	0	0	0	0	0	0	-0.107509	0	0	0	0	0	0	0	0	0	0	0	0	0	0	0	0	0	0	0	0	0	0	0	0	0	0	0
SGN-U213709	SGN-U313759	0	0	0	-0.0131073	0	0	0	0	0	0	0	0	0	0	0	0	0	0	0	0	0	0	0	0	0	0	0	0	0	0	0	0	0	0	0	0	0	0	0	0	0	0	0	0	0	0	0	0
SGN-U219231	SGN-U313920	0	0	0	0	0	0	0	0	0	0	0	0	-0.176138	0	0	0	0	0	0	0	0	0	0	0	0	0	0	0	0	-0.0157922	0	0	0	0	0	0	0	0	0	0	0	0	0	0	0	0	0	0
SGN-U214053	SGN-U313373	0	0	0	0	0	0	0.0379355	0	0	0	0	0	0	0	0	0	0	0	0	0	0	0	0	0	0	0	0	0	0	0	0	0	0	0	0	0	0	0	0	0	0	0	0	0	0	0	0	0
SGN-U219005	SGN-U321102	0.24357	0	0	0	0	0	0	0	0	0	0	0	0	0	0	0	0	0	0	0	0	0	0	0	0	-0.0226046	0	0	0	0	0	0	0	0	-0.0389927	0	0	0	0	0	0	0	0	0	0	0	0	0
SGN-U221920		0	0	0	0	0	0	0	0	0	0	0	0	0	0	0	0	0	0	0	0	0	0	0	0	0	0	0	0	0	-0.0710632	0	0	0	0	0	0	0	0	0	0	0	0	0	0	0	0	0	0
SGN-U218015	SGN-U320137	0	0	0	0	0	0	0	0	0	0	0	0	0	0	0	0	0	0	0	0	0	0	0	0	0	0	0	0	0	0	0	0	0	0	0	0	0.0691605	0	0	0	0	0	0	0	0	0	0	0
SGN-U221533	SGN-U314544	0	0	0	0	0	0	0	0	0	0	0	0	0	0	0	-0.0836358	0	0	0	0	0	0	0	0	0	0	0	0	0	0	0	0	0	0	0	0	0	0	0	0	0	0	0	0	0	0	0	0
SGN-U215001	SGN-U313803	0	0	0	0	0	0	0	0	0	0	0	0	0	0	0	0	0	0	0	0	0	0	0	0	0	0	0	0	0	0	0	0	0	0	0	0	0	0	0	0	0	0	0	0	0	0	0	0
SGN-U215681	SGN-U316194	0	0	0	0	0	0	0	0	0	0	0	0	0	0	0	0	0	0	0	0	0	0	0	0	0	0	0	0	0	0	0	0	0	0	0	0	0	0	0	0	0	0	0	0	0	0	0	0
SGN-U220731	SGN-U323142	0	0	0	0	0	0	0	0	0	0	0	0	0	0	0	0	0	0	0	0	0	0	0	0	0	0	0	0	0	0	0	0	0	0	0	0	0	0	0	0	0	0	0	0	0	0	0	0
SGN-U229622	SGN-U322407	0	0	0	0	0	0	0	0	0	0	0	0	0	0.122384	0	0	0	0	0	0	0	0	0	0	0	0	0	0	-0.023905	0	0	0	0	0	0	0	0	0	0	0	0	0.123891	0	0	0	0	0	0
SGN-U218721	SGN-U316258	0	0	0	0	0	0	0.29514	0	0	0	0	0	0	0	0	0	0	0	0	0	0	0	0	0	0	0	0	0	0	0	0	0	0	0	0	0	0	0	0	0	-0.0527076	0	-0.00260684	0	0	0	0	0
SGN-U216520	SGN-U317324	0	0	0	0	0	0	0	0	0	0	0	0	0	0	0	0	0	0	0	0	0	0	0	0	0	0	-0.213327	0	0	0	0	0	0	0	0	0	0	0	0	0	0	0	0	0	0	0	0	0
SGN-U213916	SGN-U313853	0.148869	0	0	0	0	0	0	0	0	0	0	0	0	0	0	0	0	-0.0519593	0	0	0	0	0	0	0	0	0	0	0	0	0	0	0	0	0	0	0	0	0	0	0	0	0	0	0	0	0	0
SGN-U223374	SGN-U326769	0	0	0	-0.0844549	0	0	0	0	0	0	0.0741197	0	0	0	0	0	0	0	0	0	-0.102885	0	0	0	0	0	0	0	0	0	0	0	0	0	0	0	0	0	0	0	0	0	0	0	0	0	0	0
SGN-U217233	SGN-U319033	0	0	0	0	0	0	0	0	0	0	0	0	0	0	0	0	0	0	0	0	0	0	0	0	0	0	0	0	0	0	0	0	0	0	0	-0.0980641	0	0	0	0	0	0	0	0	0	0	0	0
SGN-U214689	SGN-U315394	0	0	0	0	0.0230531	0	0	0	0	0	0	0	0	0	0	0	0.0967021	0	0.0190842	0	0	0	0	0	0	0	0	0	0	0	0	0	0	0	0	0	0	0	0	0	0	0	0	0	0	0	0	0
SGN-U219877	SGN-U318472	0	0	0	0	0	0	0	0	0	0	0	0	0	0	0	0	0	0	0	0	0	0	0	0	0	0	0	0	0	0	0	0	0	0	0	0	0	0	0	0	0	0	0	0	0	0	0	0
SGN-U212790	SGN-U314922	0	0	0	0	-0.0284478	0	-0.0125142	0	0	0	0	0	0	0	0	0	0	0	0	0	0	0	0	0	0	0	0	0	0	0	0	0	0	0	0	0	0	0	0	0	0	0	0	0	0	0	0	0
SGN-U220882	SGN-U319988	0.0207217	0	0	0	0	0	0	0	0.0846161	0	0	0	0	0	0	0	0	0	0	0	0	0	0	0	0	0	0	0	0	0.0274755	0	0	0	0	0	0	0	0	0	0	0	0	0	0	0	0	0	0
SGN-U216371	SGN-U317953	0	0	0	0	0	0	0	0	0	0	0	0	0	0	0	0	0	0	0	0	0	0	0	0	0	0	0	0	0	0	0	0	0	0	0	0	0	0	0	0	0	0	0	0	0	0	0	0
SGN-U216454		0	0	0	0	0	0	0	0	0	0	0	0	0	0	0	0	0	0	0	0	0	0	0	0	0	0	0	0	0	0	0	0	0	0	0	0	0	0	0	0	0	0	0	0	0	0	0	0
SGN-U216406		0	0	0	0	0	0	0	0	0	0	0	0	0	0	0	0	0	0	0	0	0	0	0	0	0	0	0	0	0	0	0	0	0	0	0	0	-0.0942336	0	0	0	-0.129238	0	-0.0784961	0	0	0	0	0
SGN-U220964	SGN-U323638	0	0	0	0	0	0	0	0	-0.0319222	0	0	0	0	0	0	0	0	0	0	0	0	0	0	0	0	0	0	0	-0.0439376	0	0	0	0	0	0	0	0	0.0173733	0	0	0	0	-0.11371	0	0	0	0	0
SGN-U216321	SGN-U317916	0	0	0	0	0	0	0	0	0	0	0	0	0	0	0	0	0	0	0	0	0	0	0	0	0	0	0	0	0	0	0	0	0	0	0	0	0	0	0	0	0	0	0	0	0	0	0	0
SGN-U213054		0	0	0	0	0	0	-0.0804747	0	0	0	0	0	0	0	0	0	0	0	0	0	0	0	0	0	0	0	0	0	0	0	0	0	0	0	0	0	0	0	0	0	0	0	0	0	0	0	0	0
SGN-U213118	SGN-U312786	0	0	0	0	0	0	0	0	0	0	0	0	0	0	0	0	-0.252774	0	0	0	0	0	0	0	0	0	0	0	0	0	0	0	0	0	0	0	0	0	0	0	0	0	0	0	0	0	0	0
SGN-U218603		0	0	0	0	0	0	0	0	0	0	0	0	0	0	0	0	0	0	0	0	0	0	0	0	0	0	0	0	0	-0.0225058	0	0	0	0	0	0	0	0	0	0	0	0	0	0	0	0	0	0
SGN-U218890	SGN-U320038	0	0	0.151044	0	0	-0.253516	0	0	0	0	0	0	0	0	0	0	0	0	0	0	0	0	0	-0.265101	0	0	0	0	0	0	0	0	0	0	0	0	0	0	0	0	0	0	0	0	0	0	0	0
SGN-U220542	SGN-U323369	0	0	0	0	0	0	0	0	0.0218585	0	0	0	0	0	0	0	0	0	0	0	0	0	0	0	0	0	0	0	0	0	0	0	0	0	0	0	0	0	0	0	0	0	0	0	0	0	0	0
SGN-U222369	SGN-U325749	0	0.0640716	0	0	0	0	0	0	0	0	0	0	0	0	0	0	0	0	0	0	0	0	0	0	0	0	0	0	0	0	0	0	0	0	0	0	0	0	0	0	0	0	0	0	0	0	0	0
SGN-U220322	SGN-U322738	0	0	0	0	0	0	0	0	0	0	0	0	0	0	0	0	0	0	0	0	0	0	0	0	0	0	0	0	0	0	0	0	0	0	0	0	0	0	0	0	0.00985331	0	0	0	0	0	0	0
SGN-U220234	SGN-U322305	0	0	0	0	0	0	0	0	0	0	0	0	0	0	0	0	0	0	0	0	0	0	0	0	0	0	0	0	0	-0.389141	0	0	0	0	-0.0498221	-0.025878	0	0	0	0	0	0	0	0	0	0	0	0
SGN-U214591	SGN-U315695	0	0	0	0	0	0	0.0461975	0	0	0	0	0	0	0	0	0	-0.00645792	0	0	0	0	0	0	0	0	0	0	0	0	0	0	0	0	0	0	0	0	0	0	0	0	0	0	0	0	0	0	0
SGN-U217682		0	0	0	0	0	0	0	0	0	0	0	0	0	0	0	0	0	0	0	0	0	0	0	0	0	0	0	0	0	0	0	0	0	0	0	0	0	0	-0.0533154	0	0	0	0.00488365	0	0	0	0	0
SGN-U227230	SGN-U328820	0	0	0	0	0	0	0	0	0	0	0	0	0	0	0	0	0	0	0	0	0	0	0	0	0	0	0	0	0	0	0	0	0	0	0	0	0	0	0	0	0	0	0	0	0	0	0	0
SGN-U213674	SGN-U313515	0	0	0	0	0	0	0	0	0	0	0	0	0	0	0	0	0	0	0	0	0	0	0	0	0	0.107636	0	0	0	0	0	0	0	0	0	0	0	0	0	0	0	0	0	0	0	0	0	0
SGN-U227335	SGN-U325837	0	0	0	0	0	-0.0426996	0	0	0	0	0	0	0	0	0	0	0	0	0	0	0	0	0	0	0	0	0	0	0	0	0	0	0	0	0	0	0	0	0	0	0	0	0	0	0	0	0	0
SGN-U232939		0	0	0	0	0	0	0	0	0	0	0	0	0	0	0	0	0	0	0	0	0	0	0	0	0	0	0	0	0	0	0	0	0	0	0	0	0	0	0	-0.0174989	0	0	0	0	0	0	0	0
SGN-U213946	SGN-U314345	0	0	0	0	0	0	0	0	0	0	0	0	-0.0657366	0	0	0	0	0	0	0	0	0	0	0	0	0	0	0	0	0	0	0	0	0	0	0	0	0	0	0	0	0	0	0	-0.0287237	0	0	0
SGN-U219049	SGN-U320773	0	0	0	0	0	0	0	0	0	0	0	0	0	0	0	0	0	0	0	0	0	0	0	0	0	0	0	0	0	0	0	0	0	0	0	0	0	0	0	0	0	0	0	0	0	0	0	0
SGN-U221858	SGN-U322977	0	0	0	0	0	0	0	0	0	0	0	0	0	0	0	0	0	0	0	0	0	0	0	0	0	0	0	0	0	0	0	0	0	0	0	0	0	0	0	0	0	0	0	0	0	0	0	0
SGN-U217575	SGN-U317733	0	0	0	0	0	0	0	0	0	0	0	0	0	0	0	0	0	0	0	0	0	0	0	0	0	0	0	0	0	0	0	0	0	0.036895	0	0	0	0	0	0	0	0	0	0	0	0.0416265	0	0
SGN-U216194	SGN-U316591	0	0	0	0	0	0	0.290647	0	0	0	0.304461	0	0	0	0	0	0	0	0	0	0	0	0	0	0	0	0	0	0	0	0	0	0	0	0	0	0	0	0	0	0	0	0	0	0	0	0	0
SGN-U220042	SGN-U321233	0	0	0	0	0	0	0	0	0	0	0	0	0	0	0	0	0	0	0	0	0	0	0	0	0	0	0	0	0	0	0	0	0	0	0	0	0	0	0	0	0	0	0	0	0	0	0	0
SGN-U225742	SGN-U321464	0	0	0	0	0	0	0	0	0	0	0	0	0	0.200664	0	0	0	0.1717	0	0	0	0	0	0	0	0	0	0	0	0	0	0	-0.142736	0	0	0	0	0	0	0	0	0	0	0	0	0	0	0
SGN-U216341		0	0	0	0	0	0	0	0	0	0	0	0	0	0	0	0	0	0	0	0	0	0	0	0	0	0	0	0	0	0	0	0	0	0	0	0	0	0	0	0	0.103971	0	0	0	0	0	0	0
SGN-U225967	SGN-U317721	0	0	0	0	0	0	0	0	0	0	0	0	0	0	0	0	0	0	0	0	0	0	0	0	0	0	0	0	0	0	0	0	0	0	0	0	0	0	0	0	0	0	0	0	0	0	0	0
SGN-U218470		0	0	0	0.107639	0	0	0	0	0	0	0	0	0	0	0	0	0	0	0	0	0	0	0	-0.0828657	0	0	0	0	0	0	0	0	0	0	0	0	0	0	0	0	0	0	0	0	0	0	0	0
SGN-U215320	SGN-U316092	0	0	0	0	0	0	0	0	0	0	0	0	0	0	0	0	0	0	0	0	0	0	0	0	0	0	0	0	0	0	0	0	0	0	0	0	0	0	0	0	0	-0.284477	0	0	0	0	0	0
SGN-U214286	SGN-U314862	0	0	0	0	0	0	0	0	0	0	0	0	0	0	0	0	0	0	0	0	0	0	0	0	0	0.0792792	0	0	0	0	0	0	0	0	0	0	0	0	0	0	0	0	0	0	0	0	0	0
BT014484	BT014484	0	0	0	0	0	0	0	0	0	0	0	0	0	0	0	0	0	0	0	0	0	0	0	0	0	0	0	0	0	0	0	0	0	0	0	0	0	0	0	0	0	0	0	0	0	0	0	0
SGN-U219249	SGN-U321160	0	0	0	0	0	0	0	0	0	0	0	0	0	0	0	0	0	0	0	0	0	0	0	0	0	0	0	0	0	0	0	0	0	0	0	0	0	0	0	0	0	0	0	0	0	0	0	0
SGN-U216199	SGN-U317845	0	0	0	0	0	0	0	0	0	0	0	0	0	0	0	0	0	0	0	0	0	0	0	0	0	0	0	-0.0792812	0	0	0	0	0	0	0	0	0	0	0	0	0	0	0	0	0	0	0	0
SGN-U216275	SGN-U317121	0	0	0	0	0	0	0	0.0646775	0	0	0	0	0	0	0	0	0	0	0	0	0	0	0	0	0	0	0	0	0	0	0	0	0	0	0	0	0	0	0	0	0	0	0	0	0	0	0	0
SGN-U217978	SGN-U317099	0	0	0	0	0	0	0	0	0	0	0	0	0	0	0	0	0	0	0	0	0	0	0	0	0	0	0	0	0	0	0	0	0	0	0	0	0	0	0	0	0	0	0	0	0	0	0	0
SGN-U215800	SGN-U316687	0	0	0	0	0	0	0	0	0	0	0	0	0	0	0	0	0	0	0	0	0	0	0	0	0	0	0	0	0	0	0	0	0	0	0	0	0	0	0	0	0	0	0	0	0	0	0	0
SGN-U212883	SGN-U312562	0	0	0	0	0	0	0	0	0	0	0	0	0	0	0	0	0	0	0	0	0	0	0	0	0	0	0	0	0	0	0	0	0	0	0	0	0	0	0	0	0	0	0	0	0	0	0	0
SGN-U222180	SGN-U322484	0	0	0	0	0	0	0	0	0	0	0	0	0	0	0	0	0	0	0	0	0	0	0	0	0	0	0	0	0	0	0	0	0	0	0	0	0	0	0	0	0	0	0	0	0	0	0	0
SGN-U216385	SGN-U316114	0	0	0	0.179891	0	0	0	0	0	0	0	0	0	0	0	0	0	0	0	0	0	0	0	0	0	0	0	0	0	0	0	0	0	0	0	0	0	0	0	0	0	0	0	0	0	0	0	0
SGN-U222747		0	0	0	0	0	0	0	0	0	0	0	0	0	0	0	0	0	0	0	0	0	0	0	0	0	0	0	0	0	0	0	0	-0.137983	0	0	0	0	0	0	0	0	0	0	0	0.193216	0	0	0
SGN-U228025		0	0	0	0	0	0	0.0364422	0	0	0	0	0	0	0	0	0	0	-0.146342	0	0	0	0	0	0	0	0	0	0	0	0	0	0	0	0	0	0	0	0	0	0	0	0	0	0	0	0	0	0
SGN-U217924	SGN-U318543	0	0	0	0	0	0	0	0	0	0	0	0	0	0	0	0	0	0	0	0	0	0	0	0	0	0	0	-0.212525	0	0	0	0	0	0	0	0	0	0	0	0	0	0	0	0	0	0	0	0
Y12640		0	0	0	0	0	0	0	0	0	0	0	0	0	0	0	0	0	0	0	0	0	0	0	0	0	0	0	0	0	0	0	0	0	0.123619	0	0	0	0	0	0	0	0	0	0	0	0	0	0
SGN-U220043	SGN-U318264	0	0	0	0	0	0	0	0	0	0	0	0	0	0	0	0	0	0.181112	0	0	0	0	0	0	0	0	0	0	0	0	0	0	0	0	0	0	0	0	0	0	0	0	0	0	0	0	0	0
SGN-U214570	SGN-U317084	0	0	0	0	0	0	0	0	0	0	0	0	0	0	0	0	0	0	0	0	0	0	0	0	0	0	0	-0.0736675	0	0	0	0	0	0	0	0	0	0	0	0	0	0	0	0	0	0	0	0
SGN-U213645	SGN-U312523	0	0	0	0	0	0	0	0	0	0	0	0	0	0	0	0	0	0	0	0	0	0	0	0	0	0	0	0	0	0	0	0	0	0	0	0	0	0	0	0	0	0	0	0	0	0	0	0
SGN-U215468	SGN-U315351	0	0	0	0	0	0	0	0	0	0	0	0	0	0	0	0	0	0	0	0	0	0	0	0	0	0	0	0	0	0	0	0	0	0	0	0	0	0	0	0	0	0	0	0	0	0	0	0
SGN-U214924	SGN-U315480	0	0	0	0	0	0	0	0	0	0	0	0	0	0	0	0	0	0	0	0.296625	0	0	0	0	0	0	0	0	0	0	0.0645712	0	0	0	0	0.0333777	0	0	0	0	0	-0.164404	0	0	0	0	0	0
SGN-U217992	SGN-U318165	0	0	0	0	0	0	0	0	0	0	0	0	0	0	0	0	0	0	0	0	0	0	0	0.0984911	0	0	0	0	0	0	0	0	0	0	0	0	0	0	0	0	0	0	0	0	0	0	0	0
SGN-U225214	SGN-U328828	0	0.0746678	0	0	0	0	0	0	0	0	0	0	0	0	0	0	0	0	0	0	0	0	0	0	0	0	0	0	0	0	0	0	0	0	0	0	0	0	0	-0.0196809	0	0	0	0	0	0	0	0
SGN-U215180	SGN-U315008	0	0	0	0	0	0	0	0	0	0	0	0	0	0	0	0	0	0	0	0	0	0	0	0	0	0	0	0	0	0	0	0	0	0	0	0	0	0	0	0	0	0	0	0	0	0	0	0
SGN-U216215	SGN-U317475	0	0	0	0	0	0	0	0	0	0	0	0	0	0	0	0	0	0	0	0	0	0	0	0	0	0	0	0	0	0	0	0	0	0	0	0	0	0	0	0	0	0	0	0	0	0	0	0
SGN-U214484	SGN-U313651	0	0	0	0.0641868	0	0	0	0	0	0	0	0	0	0	0	0	0	0	0	0	0	0	0	0	0	0	0	0	0	0	0	0	0	0	0	0	0	0	0	0	0	0	0	0	0	0	0	0
SGN-U227634	SGN-U318308	0	0	0	0	0	0	0	0	0	0	0	0	0	0	0	0	0	0	0	0	0	0	0	0	0	0	0	0	0	0	0	0	0	0	0	0	0	-0.356856	0	0	0	0	0	0	0	0	0	0
SGN-U226121	SGN-U328040	0	0	0	0	0	0	0	0	0	0	0	0	0	0	0	0	0	0	0	0	0	0	0	0	0	0	0	0	0	0	0	0	0	0	0	0	0	0	0	0	0	0	0	0	0	0	0	0
SGN-U214040	SGN-U313720	0	0	0	0	0	0	0	0	0	0	0	0	0	0	0	0	0	0	0	0	0	0	0	0	0	0	0	0	0	0	0	0	0	0	0	0	0	0	0	0	0	0	0	0	0	0	0	0
SGN-U218626	SGN-U318959	0	0	0	-0.0900983	0	0	0	0	0	0	0	0	0	0	0	0	0	0	0	0	0	0	0	0	0	0	0	0	0	0	0	0	0	0	0	0	0	0	0	0	0	0	0	0	0	0	0	0
SGN-U219086	SGN-U320479	0.02906	0	0	0	0	0	0	0	0	0	0	0	0	0	0	0	0	0	0	0	0	0	0	0	0	0	0	0	0	0	0	0	0	0	0	0	0	0	-0.0418513	0	0	-0.0474177	0	0	0	0	0	0
SGN-U230638	SGN-U317456	0	0	0	0	0	0	0	0	0	0	0	0	0	0	0	0	0.103944	0	0	0	0	0	0	0	0	0	0	0	0	0	0	0	0	0	0	0	0	0	0	0	0	0	0	0	0	0	0	0
SGN-U217611	SGN-U318766	0	0	0	0	0	0	0	0	0	0	0	0.103775	0	0	0	0	0	0	0	0	0	0	0	0	0	0	0	0	0	0	0	0	0	0	0	0	0	0	0	0	0	0	0	0	0	0	0	0
SGN-U213931	SGN-U313790	0	0	0	0	0	0	0	0	0	0	0	0	0	0	0	0	0	0	0	0	0	0	0	0	0	0	0	0	0	0	0	0	0	0	0	0	0	0	0	0	-0.144416	0	0	0	0	0	0	0
SGN-U221107		0	0	0	0	0.0287944	0	0	0	0	0	0	0	0	0	0	-0.327523	0	0	0	0	0	0	0	0	0	0	0	0	0	0	0	0	0	0	0	0	0	0	0	0	0	0	0	0	0	0	0	0
SGN-U212604		0	0	0	0	0	0	0	0	0	0	0	0	0	0	0	0	0	0	0	0	0	0	0	0	0	0	0	0	0	0	0	0	0	0	0	0	0	0	0	0	0	0	0	0	0	0	0	0
SGN-U232626	SGN-U334439	0	0	0	0	0	0	0	0	0	0	0	0	0	0	0	0	0	0	0	0	0	0	0	0	0	0	0	0	0	0	0	0	0	0	0	0	0	-0.0314976	-0.0788016	0	0	0	0	0	0	0	0	0
SGN-U212739		0	0	0	0	0	0	0	0	0	0	0	0	0	0	0	0	0	0	0	0	0	0	0	0	0	0	0	0	0	0	0	0	0	0	0	0	0	0	0	0	0	0	0	0	0	0	0	0
SGN-U223726	SGN-U327018	0	0	0	0	0	0	0	0	0	0	0	0	0	0	0	0	0	0	0	0	0	0	0	0	0	0	0	0	0	0	0	0	0	0	0	0	0	0	0	0	0	0	0	0	0	0	0	0
SGN-U213159	SGN-U313051	0	0	0	0	0	0	0	0	0	0	0	0	0	0	0	0	0	0	0	0	0	0	0	0	0	0	0	0	0	0	0	0	0	0	0	0	0	0	0	0	0	0	0	0	0	0	0	0
SGN-U215642	SGN-U315461	0	0	0	0	0	0	0	0	0	0	0	0	0	0	0	0	0	0	0	0	0	0	0	0	0	0	0	0	0	0	0	0	0	0	0	0	0	0	0	0	0	0	0	0	0	0	0	0
SGN-U240026	SGN-U340284	0	0	0	0	0	0	0	0	0	0	0	0	0	0	0	0	0	0	0	0	0	0	0	0	0	0	0	0	0	0	0	0	0	0	0	0	0	0	0	0	0	0	0	0	0	0	0	0
SGN-U222649	SGN-U321363	0	0	0	0	0	0	0	0	0	0	0	0	0	0	0	0	0	0	0	0	0	0	0.022674	0	0	0	0	0	0	0	0	0	0	0	0	0	0	0	0	0	0	0	0	0	0	0	0	0
SGN-U215447	SGN-U331578	0	0	0	0	0	0	0	0	0	0	0	0	0	0	0	0	0	0	0	0	0	0	0	0	0	0	0	0	0	0	0	0	0	0	0	0	0	0	0.131513	0	0	0	0	0	0	0	0	0
SGN-U217557	SGN-U318086	0	0	0	0	0	0	0	0.0839139	0	0	0	0	0	0	0	0	0	0	0	0	0	0	0	0	0	0	0	0	0	0	0	0	0	0	0	0	0	0	0	0	0	0	0	0	0	0	0	0
SGN-U219162	SGN-U321292	0	0	0	0	0	0	0	0	0	0	0	0	0	0	0	0	0	0	0	0	0	0	0	0	0	0	0	0	0	0	0	0	0	0	0	0	0	0	0	0.0377851	0	0	0	0	0	0	0	0
SGN-U226518		0	0	0	0	0	0	0	0	0	0	0	0	0	0	0	0	0	0	0	0	0	0	0	0	0	0	0	0	0	0	0	0	0	0	0	0	0	0	0	0	0	0	0	0	0	0	0	0
SGN-U217814	SGN-U319035	0	0	0	0	0	0	0	0	0	0	0	0	0	0	0	0	0	0	0	0	0	0	0	0	0	0	0	0	0	0	0	0	0	0	0	0	0	0	0	0	0	0	0	0	0	0	0	0
SGN-U213199	SGN-U312991	0	0	0	0	0	0	0	0	0	0	0	0	0	0	0	0	0	0	0	0	0	0	0	0	0	0	0	0	0	0	0	0	0	0	0	0	0	0	0	0	0	0	0	0	0	0	0	0
SGN-U227860	SGN-U329062	0	0	0	0	0	0	0	0	0	0	0	0	0	0	0	0	0	0	0	0	0	0	0	0	0	0	0	0	0	0	0	0	0	0	0	0	0	0	0	0	0	0	0	0	0	0	0	0
L23424		0	0	0	-0.180094	0	0	0	0	0	0	0	0	0	0	0	0	0	0	0	0	0	0	0	0	0	0	0	0	0	0	0	0	0	0	0	0	0	0	0	0	0	0	0	0	0	0	0	0
SGN-U212711		0	0	0	0	-0.110819	0	0	0	0	0	0	0	0.179741	0	0	0	0	0	0	0	0	0.08839	0	0	-0.0073032	0	0	0	0	0	0	0	0	0	0	0	0	0	0	0	0	0	0	-0.0341538	0	0	0	0
SGN-U213203	SGN-U312642	0	0	0	0	0	0	0.0160113	0	0	0	0	0	0	0	0	0	0	0	0	0	0	0	0	0	0	0	0	0	0	0	0	0	0	0	0	0	0	-0.0212162	0	0	0	0	0	0	0	0	0	0.130905
SGN-U213584	SGN-U313416	0	0	0	0	0	0	0	0	0	0	0	0	0	0	0.0703356	0	0	0	0	0	0	0	0	0	0	0	-0.363133	0	0	0	0	0	0	0	0	0	-0.160161	0	0	0	0	0	0	0	0	0	0	0
SGN-U212715	SGN-U312391	0	0	-0.0279108	0	0	0	0	0	0	0	0	0	0.0301421	0	0	0	0	0	0	0	0	0	0	0	0	0	0	0	0	0	0	0.398633	0	0	0	0	0	0	0	0	0	0	0	0	0	0	0	0
SGN-U225534	SGN-U314718	0	-0.195863	0	0	0	0	0	0	0	0	0	0	0	0	0	0	0	0	0	0	0	0	0	0	0	0	0	0	0	0	0	0	0	0	0	0	0	0	0	0	0	0	0	-0.163003	0	0	0	0
SGN-U222469	SGN-U325426	0	0	0	0	0	0	0	0	0	0	0	0	0	0	0	0	0	0	0	0	0	0	0	0	0	0	0	0	0	0	0	0	0	0	0	0	0	0	0	0	0	0	0	0	0	0	0	0
SGN-U214182	SGN-U315079	0	0	0	0	0	0	0	0	0	0	0	0	0	0	0	0	0	0	0	0	0	0	0	0	0	0	0	0	0	0	0	0	0	0	0	0	0	0	0	0	0	0	0	0	0	0	0	0
SGN-U215090	SGN-U316052	0	0	0	0	0	0	0	0	0	0	0	0	0	0	0	0	0	0	0	-0.041142	0	0	0	0	0	0	0	0	0	0	0	0	0	0	0	0	0	0	0	0	0	0	0	0	0	0	0	0
SGN-U215600	SGN-U316715	0	0	0	0	0	0	0	0	0	0	0	0	0	0	0	0	0	0	0	0	0	0	0	0	0	0	0	0	0	0	0	0	0	0	0	0	0	0	0	0	0	0	0	0	0	0	0	0
SGN-U215261	SGN-U315165	0	0	0	0	0	0	0	0	0	0	0	0	0	0	0	0	0	0	0	0	0	0	0	0	0	0	0	0	0	0	0	0	0	0	0	0	0	0	0	0	0	0	0	0	0	0	0	0
SGN-U220404		0	0	0	0	0	0	0	-0.00551147	0	0	0	0	0	0	0	0	0	0	0	0	0	0	0	0	0	0	0	0	0	0	0	0	0	0	0	0	0	0	0	0	0	0	0	0	0	0	0	0
SGN-U215233	SGN-U316826	0	0	0	0	0	0	0	0	0	0	0	0	0	0	0	0	0	0	0	0	-0.00045702	0	0	0	0	0	0	0	0	0	0	0	0	0	0	0	0	0.0226538	0	0	0	0	0	0	0	0	0	0
SGN-U214355	SGN-U313813	0.212391	0	0	0	0	0	0	0	0	0	0	0	0	0	0	0	0	0	0	0	0	0	0.0736629	0	0	0	0	0	0	0	0	0	0	0	0	0	0	0	0	0	0	0	0	0	0	0	0	0
SGN-U220562	SGN-U321192	0	0	0	0	0	0	0	0	0	0	0	0	0	0	0	0	0	0	0	0	0	0	0	0	0	0	0	0	0	0	0	0	0	0	0	0	0	0	0	0	0	0	0	0	0	0	0	0
SGN-U213616	SGN-U334029	0	0	0	0	0	0	0	0	0	0	0	0	0	0	0.0868673	0	0	0	0	0	0	0	0	0	0	0	-0.078133	0	0	0	0	0	0	0	0	0	0	0	0	0	0	0	0	0	0	0	0	0
SGN-U216694	SGN-U318445	0	0	0	0	0	0	0	0	0	0	0	0	0	0	0	0	0	0	0	0	0	0	0	0	0	0	0	0	0	0	0	0	0	0	0	0	0	0	0	0	0	0	0	0	0	0	0	0
SGN-U236654		0	0	0	0	0	0	0	0	0	0	0	0	0	0	0	0	0	0	0	0	0	0	0	0	0	0	0	0	0	0	0	0	0	0	0	0	0	0	0	0	0	0	0	0	0	0	0	0
SGN-U213967	SGN-U314214	0	0	0	0	0	0	0	0	0	0	0	0	0	0	0	0	0	0	0	0	0	0	0	0	0	0	0	0	0	0	0	0	0	0	0	0	0	0	0	0	0	0	0	0	0	0	0	0
SGN-U227032	SGN-U328378	0	0	0	0	0	0	0	0	0	0	0	0	0	0	0	0	0	0	0	0	0	0	0	0	0	0	0	0	0	0	0	0	0	0	0	0	0	0	0	0	0	-0.0707837	0	0	0	0	0	0
SGN-U213630	SGN-U313697	0	0	0	0	0	0	0	0	0	0	0	0	0	0	0	0	0	0	0	0	0	0	0	0	0	0	0	0	0	0	0	0	0	0	0	0	0	0	0	0	0	0	0	0	0	0	0	0
SGN-U236778	SGN-U346096	0	0	0	0	0	0	0	0	0	0	0	0	0	0	0	0	0	0	0	0	0	0	0	0	0	0	0	0	0	0	0	0	0	0	0	0	0	0	0	0	0	0	0	0	0	0	0	0
SGN-U214495	SGN-U314197	0	0	0	0	0	0	0	0	0	0	0	0	0	0	0	0	0	0	0	0	0	0	0	0	0	0	0	0	0	0	0	0	0	0	0	0	0	0	0	0	0	0	0	0	0	0	0	0
SGN-U217418	SGN-U313365	0	0	0	0	0	0	0	0	0	0	0	0	0	0	0	0	0	0	0	0	0	0	0	0	0	0	0	0	0	0	0	0	0	0	0	0	0	0	0	0	0	0	0	0	0	0	0	0
SGN-U225427	SGN-U327265	0	0	0	0	0	0	0	0	0	0	0	0	0	0	0	0	0	0	0	0	0	0	0	0	0	0	0	0	0	0	0	0	0	0	0	0	0	0	0	0	0	0	0	0	0	0	0.236904	0
SGN-U216928		0	0	0	0	0	0	0.073488	0	0	0	0	0	0	0	0	0	0	0	0	0	0	0	0	0	0	0	0	0	0	0	0	0	0	0	0	0	0	0	0	0	0	0	0	0	0	0	0	0
SGN-U226675		0	0	0	0	0	0	0	0	0	0	0	0	0	0	0	0	0	0	0	-0.0383928	0	0	0	0	0	0	0	0	0	0	0	0	0	0	0	0	0	0	0	0	0	0	0	0	0	0	0	0
SGN-U229631	SGN-U332575	0	0	-0.0443813	0	0	0	0	0	0	0	0	0	0	0	0	0	0	0	0	0	0	0	0	0	0	0	0	0	0	0	0	0	0	0	0	0	0	0	0	0	0	0	0	0	0	0	0	0
SGN-U225885		0	0	0	0	0	0	0	0	0	0	0	0	0	0	0	0	0	0	0	0	0	0	0	0	0	0	0	0	0	0	0	0	0	0	0	0	0	0	0	0	0	-0.144037	0	0	0	0	0	0
SGN-U229614		0	0	0	0	0	0	0	0	0	0	0	0	0	0	0	0	0	0	0	0	0	0	0	0	0	0	0	0	0	0	0	0	0	0	0	0	0	0	0	0	0	0	0	0	0	0	0	0
SGN-U220770	SGN-U319497	0	0	0	0	0	0	0	0	0	0	0	0	0	0	0.0761214	0	0	0	0	0	0	0	0	0	0	0	0	0	0	0	0	0	0	0	0	0	0	0	0	0	0	0	0	0	0	0	0	0
SGN-U214304	SGN-U314129	0	0	-0.086542	0	0	0	0	0	0	0	0	0	0	0	0	0	0	0	0	0	0	0	0	0	0	0	0	0	0	0	0	0	0	0	0	0	0	0	0	0	0	0	0	0	0	0	0	0
SGN-U219235	SGN-U320039	0	0	0	0	0	0	0	0	0	0	0	0	0	0	0	0	0	0	0	0	0	0	0	0	0	0	0	0	0	0	0	0	0	0	0	0	0	0	0	0	0	0	0	0	0	0	0	0
SGN-U213802	SGN-U313824	0	0	0	0	0	0	0	0	0	0	0	0	0	0	0	0	0	0	0	0	0	0	0	0	0	0	0.0254176	0	0	0	0	0	0	0	0	0	0	0	-0.104118	0	0	0	0	0	0	0	0	0
SGN-U218791	SGN-U320071	0	0	0	0	0	0	0	0	0	0	0	0	0	0	0	0	0	0	0	0	0	0	0	0	0	0	0	0	0	0	0	0	0	0	0	0	0	-0.28251	0	0	0	0	0	0	0	0	0	0
SGN-U224088	SGN-U337714	0	0	0	0	0	0	0	0	0	0	0	0	0	0	0	0	0	0	0	0	0	0	0	0	0	0	0	0	0	0	0	0	0	0	0	0	0	0	0	0	0	0	0	0	0	0	0	0
SGN-U212847	SGN-U314880	0	0	0	0	0	0	0	0	0	0	0	0	0	0	0	0	0	0	0	0	0	0	0	0	0	0	0	0	0	0	0	0	0	0	0	0	0	0	0	0	0	0	0	0	0	0	0	0
SGN-U216871	SGN-U313454	0	0	0	0	0	0	0	0	0	0	0	0	0	0	0	0	0	0	0	0	0	-0.0651821	0	0	0	0	0	0	0	0	0	0	0	0	0	0	0	0	0	0	0	0	0	0	0	0	0	0
SGN-U218565	SGN-U320674	0	0	0	0	0	0	-0.0426394	0	0	0	0	0	0	0	0	-0.026052	0	0	0	0	0	0	0	0	0	0	0	0	0	0	0	0	0	0	0	0	0	0	-0.152999	0	0	0	0	0	0	0	0	0
SGN-U227396	SGN-U328461	0	0	0	0	0	0	0	0	0	0	0	0	0	0	-0.169859	0	0	0	0	0	0	0	0	0	0	0	0	0.00648837	0	0	-0.114328	0	0	0	0	0	0	0	0	0	0	0	0	0	0	0	0	0
SGN-U218956	SGN-U321242	0	0	0	0	0	0	0	0	0	0	0	0	0	0	0	0	0	0	0	0	0	0	0	0	0	0	0	0	0	0	0	0	0	0	0	0	0	0	0	0	0	0	0	0	0	0	0	0
SGN-U215256	SGN-U319925	0	0	0	0	0	0	0	0	0	0	0	0	0	0	0	0	0	0	0	0	0	0	0	0	0	0	0	0	0	0	0.0240912	0	0	0	0	0	0	0	0	0	0	0	0	0	0	0	0	-0.117929
SGN-U214309	SGN-U315098	0	0	0	0	0	0	0	0	0	0	0	0	0	0	0	0	0	0	0	0	0	0	0	0	0	0	0	0	0	0	0	0	0	0	0	0	0	0	0	0	0	0	0	-0.0601459	0	0	0	0
SGN-U217844	SGN-U319787	0	0	0	0	0	0	0	0	0	0	0	0	0	0	0	0	0	0	0	0	0	0	-0.0473306	0	0	0	0	0	0	0	0	0	0	0	0	0	0	0	0	0	0	0	0	0	-0.0860791	0	0	0
SGN-U215351		0	0	0	0	0	0	0	0	0	0	0	0	0	0	0	0	0	0	0	0	0	0	0	0	0	0	0	0	0	0	0	0	0	0	0	0	0	0	0	0	0	0	0	0	0	0	0	0
SGN-U212551	SGN-U312891	0	0	0	0	0	0	0	0	0	0	0	0	0	0	0	0	0	0	0	0	0	0	0	0	0.0245981	0	0	0	-0.00108617	0	0	0	0	0	0	0	0	0	0	0	0	0	0	0	0	0	0	0
SGN-U220026	SGN-U322193	0	0	0	0	0	0	0	0	0	0	0	0	0	0	0	0	0	0	0	0	0	0	0	0	0	0	-0.0353173	0	0	0	0	0	0	0	0	0	0	0	0	0	0	0	0	0	0	0	0	0
SGN-U215219	SGN-U316022	-0.034724	0	0	0	0	0	0	0	0	0	0	0	0	0	0	0	0	0	0	0	0	0	0	0	0	0	0	0	0	0	0	0	-0.167441	0	0	0	0	0	0	0	0	0	0	0	0	0	0	0
SGN-U213149	SGN-U312900	0	0	0	0	-0.0200682	0	0	0	0	0	0	0	0	0	0	0	0	0	0	0	0	0	0	0	0	0	0	0	0	0	0	0	0	0	0	0	0	0	0	0	0	0	0	0	0	0	0	0
SGN-U223818	SGN-U324316	0	0	0	0	0	0	0	0	0	0	0	0	0	0	0	0	0	0	0	0	0	0	0	0	0	0	0	0	0	0	0	0.0508714	0	0	0	0	0	0	0	0	0	0	0	0	0	-0.0185633	0	0
SGN-U215785		0	0	0	0	0	0	0	0	0	0	0	0	0	0	0	0	0	0	0	0	0	0	0	0	0	0	0	0	0	0	0	0	0	0	0	0	0	0	0	0	0	0	0	0	0	0	0	0
X59948	X59948	0	0	0	0	0	0	0	0	0	0	0	0	0	0	0	0	0	0	0	0	0	0	0	0	0	0	0	0	0	0	0	0	0	0	0	0	0	0	0	0.0502141	0	0	0	0	0	0	0	0
SGN-U218747	SGN-U320141	0	0	0	0	0	0	0	0	0	0	0	0	0	0	0	0	0	0	0	0	0	0	0	0	0	0	0	0	0	0	0	0	0	0	0	0	0	0	0	0	0	0.0288117	0	0	0	0	0	0
SGN-U221446		0	0	0	0	0	0	0	0	0	0	0	0	0	0	0.00708488	0	0	0	0	0	0	0	0	0	0	0	0	0	0	0	0.0152252	0	0	0	0	0	0	0	0	0	0	0	0	0	0	0	0	0
SGN-U218761	SGN-U320143	0	0	0	0	0	0	0	0	0	0	0	0	0	0	0	0	0.272833	0	0	0	0	0	0	0	0	0	0	0	0	0	0	0	0	0	0	0	0	0	0	0	0	0	0	0	0	0	0	0
SGN-U217912	SGN-U317514	0	0	0	0	0	0	0	0	0	0	0	0	0	0	0	0	0	0	0	0	0	0	0	0	0	0	0	0	0	0	0	0	0	0	0	0	0	0	0	0	0	0	0	0	0	0	0	0
SGN-U227307	SGN-U328236	0	0	0	0	0	0	0	0	0	0	0	0	0	0	0	0	0	0	0	0	0	0	0	0	0	0	0	0	0	0	0	0	0	0	0	0	0	0	0	0	0	0	0	0	0	0	0	0
SGN-U220262	SGN-U321392	0	0	0	0	0	0	0	0	0	0	0	0	0.0298859	0	0	0	0	0	0	0	0	0	0	0	0	0	0	0	0	0	0	0	0	0	0	0	0	0	0	0	0	0	0	0	0	0	0	0
SGN-U229915	SGN-U327869	0	0	0	0	0	0	0	0	0	0	0	0	0	-0.139619	0	0	0	0	0	0	-0.255086	0	0	0	0	0	0	0	0	0	0	0	0	0	0	0	0	0	0	0	0	0	0	0	0	0	0	0
SGN-U224754	SGN-U326922	0	0	0	0	0	0	0	0	0	0	0	0	0	0	0	0	0	0	0	0	0	0	0	0	0	0	0	0	0	0	0	0	0	0.0233287	0	0	0	0	0	0	0	0	0	0	0	0	0	0
SGN-U217056	SGN-U319304	0	0	0	0	0	0	0	0	0	0	0	0	0	0	0	0	0	0	0	0	0	0	0	0	0	0	0	0	0	0	0	0	0	0	0	0	0	0	0	0	0	0	0	0.21699	0	0	0	0
SGN-U218286	SGN-U318054	0	0	0	0	0	0	0	0	0	0	0	0	0	0	0	0	0	0	0	0	0	0	0	0	0	0	0	0	0	0	0	0.103401	0	0	0	0	0	0	0	0	0	0	0	0	0	0	0	0
SGN-U218680	SGN-U319832	0	0	0	0	0	-0.102873	0	0	0	0	0	0	0	0	0	0	0	0	0	0	0	0	0	0	0	0	0	0	0	0	0	0	0	0	0	0	0	0	0	0	0	0	0	0	0	0	0	0
SGN-U215749	SGN-U315237	0	0	0	0	0	0	0.0611236	0	0	0	0	0	0	0	0	0	0	0	0	0	0	0	0	0	0	0	0	0	0	0	0	0	0	0	0	0	0	0	0	0	0	0	0	0	0	0	0	0
SGN-U214919	SGN-U315203	0	0	0	0	0	0	0	0	0	0	0	0	0	0	0	0	0	0	0	0	0	0	0	0	-0.362718	0	0	0	0	0	0	0	0	0	0	0	0	0	0	0.046157	0	0	0	0	0.153813	0	0	0
SGN-U221818	SGN-U323011	0	0	0	0	0.0503898	0	0	0	0	0	0	0	0	0	0	0	0	0	0	0	0	0	0	0	0.077997	0	0	0	0	0	0	0	0	0	0	0	0	0	0	0	0	0	0	0	0	0	0.128638	0
SGN-U227473	SGN-U328248	0	0	0	0	0	0	0	0	0	0	0	0	0	0	0	0	0	0	0	0	0	0	0	0	0	0	0	0	0	0	0	0	0	0	0	0	0	0	0	0	0	0	0	0	0	0	0	0
SGN-U218181		0	0	0	0	0	0	0	0	0	0	0	0	0	0	0	0	0	0	0	0	0	0	0	0	0.0855173	0	0	0	0	0	0	0	0	0	0	0	0	0	0	0	0	0	0	0	0	-0.216668	0	0
SGN-U222145	SGN-U322875	0	0	0	0	0	0	0	0	0	0	0	0	0	0	0	0	0	0	0	0	0	0	0	0	0	0	0	0	0	0	0	0	0	0	0	0	0	0	0	0	0	0	0	0	0	0	0	0
SGN-U219263		0	0	0	0	0	0	0	0	0	0	0	0	0	0	0	0	0	0	0	0	0	0	0	0	0	0	0	0	0	0	0	0	0	0	0	0	0.0393401	0	0	0	0	0	0	0	0	0	0	0
SGN-U214257	SGN-U315070	0	-0.0948228	0	0	0	0	0	0	0	0	0	0	0	0	0	0	0	0	0	0	0	0	0	0	0	0	0	0	0	0	0	0	0	0	0	0	0	0	0	0	0	0	0	0	0	0	0	0
SGN-U228571	SGN-U324173	0	0	0	0	0	0	0	0	0	0	0	0	0	0	0	0	0	0	0	0	0	0	0	0	0	0	0	0	0	0	0	0	-0.0399597	0	0	0	0	0	0	0	0	0	0	0	0	0	0	0
SGN-U226400	SGN-U326045	0	0	0	-0.0683639	0	0	0	0	0	0	0	0	0	0	0	0	0	0	0	0	0	0	0	0	0	0	0	-0.00940832	0	-0.0314488	0	0	0	0	0	0	0	0	0	0	0	0	0	0	0	0	0	0
SGN-U219727	SGN-U321375	0	0	0	0	0	0	0	0	0	0	0	0	0	0	0	0	-0.145476	0	0	0	0	0	0	0	0	0	0	0	0	0	0	0	0	0	0	0	0	0	0	0	0	0	0	0	0	0	0	0
SGN-U216300	SGN-U317365	0	0	0	0	0	0	0	0	0	0	0	0	0	0	0.251864	0	0	0	0	0	0	0	0	0	0	0	0	0	0	0	0	0	0	0	0	0	0	0	0.0705685	0	0	0	0	0	0	0	0	0
SGN-U222939	SGN-U323815	0	0	0	0	0	0	0	0.0390694	0	0	0	0	0	0	0	0	0	0	0	0	0	0	0	0	0	0	0	0	0	0	0	0	0	0	0	0	0	0	0	0	0	0	0	0	0	0	0	0
SGN-U231373	SGN-U330639	0	0	0	0	0	0	0	0	0	0	0	0	0	0	0	0	0	0	0	0	0	0	0	0	0	0	0	0	0	0	0	0	0	0	0	0	0	0	0	0	0	0	0	0	0	0	0	0
SGN-U222753	SGN-U323312	0	0	0	0	0	0	0	0	0	0	0	0	0	0	0	0	0	0	0	0	0	0	0	0	0	0	0	0	0	0	0	0	0	0	0	0	0	0	0	0	0	0	0	0	0	0	0	0
SGN-U216862	SGN-U318140	0	0	0	0	0	0	0	0	0	0	0	0	0	0	0	0	0	0	0	0	0	0	0	0	0	0	0	0	0	0	0	0	0	0	0	0	0	0	0	0	0	0	0	0	0	0.0690781	0	0
SGN-U216002	SGN-U317646	0	0	0	0	0	0	0	0	0	0	0	0	0	0	0	0	0	0	0	0	0	0	0	0	0	0	0	0	0	0	0	0	0	0	0	0.0905666	0	0	0	0	0	0	0	0	0	0	0	0
SGN-U227236	SGN-U329521	0.0181072	0	0	0	0	0	0	0	0	0	0	0	0	0	-0.135587	0	0	0	0	0	0	0	0	0.0174272	0	0	0	0	0	0	0	0	0	0	0	0	0	0	0	0.0292926	0	0	0	0	0	0	0	0
SGN-U240835		0	0	0	0	0	0	0	0	0	0	0	0	0	0	0	0	0	0	0	0	0	0	0	0	0	0	0	0	0	0	0	0	0	0	0	0	0	0	0	0	0	0	0	0	0	0	0	0
SGN-U218586	SGN-U320546	0	0	0	0	0	0	0	0	0	0	0	0	0	0	0	0	0	0	0	0	0	-0.151065	0	0	0	0	0	0	0	0	0	0	0	0	0	0	0	0	0	0	0	0	0	0	0	0	0	0
SGN-U222740	SGN-U323711	0	0	0	0	0	0	0	0	0	0	0	0	0.0488029	0	0	0	0	0	0	0	0	0	0	0	0	0	0	0	0	0	0	0	0	0	0	0	0	0	0	0	0	0	0	0	0	0	0	0
SGN-U239979	SGN-U319317	0	0	0	0	0	0	0	0	0	0	0	0	0	0	0	0	0	0	0	0	0	0	0	0	0	0	0	0	0	0	0	0	0.00805509	0	0	0	0	0	0	0	0	0	0	0	0	0.0311471	0	0
SGN-U220500	SGN-U322937	0	0	0	0.0784778	0	0	0	0	0	0	0	0	0	0	0	0	0	0	0	0	0	0	0	-0.141555	0	0	0	0	0	0	0	0	0	0	0	0	0	0.0588268	0	0	0	0	0	0	0	0	0	0
SGN-U226377	SGN-U326678	0	0	0	0	0	0	0	0	0	0	0	0	0	0	0	0	0	0	0	0	0	0	0	0	0	0	0	0	0	0	0	0	0	0	0	0	0	0	0	0	0	0	0	0.0498918	0	0	0	0.157685
SGN-U224720	SGN-U334905	0	0	0	0	0	0	0	0	0	0	0	0	0	0	0	0	0	0	0	0	0	0	0	0	0	0	0	0	0	0	0	0	0	0	0	0	0	0	0	0	0	0	0	0	0	0	0	0
SGN-U213231	SGN-U312949	0	0	0	0	-0.00214883	0	0	0	0	0	0	0	0	0	0	0	0	0	0	0	0	0	0	0	0	0	0	0	0	0	0	0	0	0	0	0	0	0	0	0	0	0	0	0	0	0	0	0
SGN-U213919	SGN-U313850	0	0	0	0	0	0	0	0	0	0	0	0	0	0	0	0	0	0	0	0	0	0	0	0	0	0	0	0	0	0	0	0	0	0.100153	0	0	0	0	0	0	0	0	0	0	0	0	0	0
SGN-U215815	SGN-U317244	0	0	0	0	0	0	0	0	0	0	0	0	0	0	0	0	0	0	0	0	0	0	0	0	0	0	0	0	0	0	0	0	0	0	0	0	0	0	0	0	0	0	0	0	0	0	0	0
SGN-U223171	SGN-U324243	0	0	0	0	0	0	0	0	0	0.0766843	0	0	0	0	0	0	0	0	0	0	0	0	0	0	0	0	0	0	0	0	0	0	0	0	0	0	0	0	0	0	0	0	0	0	0	0	0	0
SGN-U225120	SGN-U325480	0	0	0	0	0	0	0	0	0	0	0	0	0	0	0	0	0	0	0	0	0	0	0	0	0	0	0	0	0	0	0	0	0	0	0	0	0	0	0	0	0	0	0	-0.0276003	0	0	0	0
SGN-U219559	SGN-U321244	0	0.31638	0	0	0	0	0	0	0	0	0	0	0	0	0	0	0	0	0	0	0	0	0	0	0	0	0	0	0	0	0	0	0	0	0	0	0	0	0	0	0	0	0	0	0	0	0	0
SGN-U219845	SGN-U322008	0	0	0	0	0	0	0	0	0	0	0	0	0	0	0	0	0	0	0	0	0	0	0	0	0	0	0	0	0	0	0	0	0	0	0	0	0	0	0	0	0	0	0	0	0	0	0	0
SGN-U239556	SGN-U342488	0	0	0	0	0	0	0	0	0.15696	0	0	0	0	0	-0.0424768	0	0	0	0	0	0	0	0	0	0	0	0	0	0	0	0	0	0	0	0	0	0	0	0	0	0	0	0	0	0	0	0	0
SGN-U233805	SGN-U335883	0	0	0	0	0	0	0	0	0	0	0	0	0	0	0	0	0	0	0	0	0	0	0	0	0	0	0	0	0	-0.0059723	0	-0.114315	0	0	0	0	0	0	0	0	0	0	0	0	0	0	0	0
SGN-U218414	SGN-U316868	0	0	0	0	0	0	0	0	0	0	0	0	0	0.0305784	0	0	0	0	0	0	0	0	0	0	0	0	0	0	0	0	0	0	0	0	0	0	0	0	0	0	0	0	0	0	0	0	0	0
SGN-U217872	SGN-U317686	0	0	0	0.0100148	0	0	0	0	0	0	0	0	0	0	0	0	0	0	-0.0187637	0	0	0	0	0	0	0	0	0	0	0	0	0	0	0	0	0	0	0	0	0	0	0	0	0	0	0	0	0
SGN-U212667	SGN-U314668	0	0	0	0	0	0	0	0	0	0	0	0	0	0	0	0	0	0	0	0	0	-0.0861342	0	0	0	0	0	0	0	0	0	0	0	0	0	0	0	0	0	0	0	0	0	0	0	0	0	0
SGN-U217185		0	0	0	0	0	0	0	0	0	0	0	0	0	0	0	0	0	0	0	0	0	0	0	0	0	0	0	0	0	0	0	0	0	0	0	0	0	0	0	0	0	0	0	0	0	0	0	0
SGN-U218446	SGN-U320737	0	0	0	0	0	0	0	0	0	0	0	0	0	0	0	0	0	0	0	0	0	0	0	0	0	0	0	0	0	0	0	0	0	0	0	0	-0.322917	0	0	0	0	0	0	0	0	0	0	0
SGN-U226059	SGN-U328067	0	0	-0.0429963	0	0	0	0	0	0	0	0	0	0	0	0	0	0	0	0	0	0	0	0	0	0.190738	0	0	0.0113083	0	-0.130684	0	0	0	0	0	0	0	0	0	0	0	0	0.0544421	0	0	0	0	0.0239551
SGN-U214599	SGN-U315971	0	0	0	0	0	0	0	0	0	0	0	0	0	0	0	0	0	0	0	0	0	0	0	0	0	0	0	-0.121404	0	0	0	0	0	0	0	0.0123781	0	0	0	0	0	0	0	0	0	0	0	0
SGN-U217760	SGN-U316504	0	0	0	0	0	0	0	0	0	0	0	0	0	0	0	0	0	0	0	0	-0.440877	0	0	0	0	0	0	0	0	0	0	0	0	0	0	0	-0.340187	-0.302482	0	0	0	0	0	0	0	0	0	0
SGN-U213637	SGN-U313879	0.137494	0	0	0	0	0	0	0	0	0	0	0	0	0	0	0	0	0	0	0	0	0	0	0	0	0	0	0	0	0	0	0	0	0	0	0	0	0	0	0	0	0	0	0	0	0	0	0
SGN-U213660	SGN-U313699	0	0	0	0	0	0	0	0	0	0	0	0	0	0	0	0	0	0	0	0	0	0	0	0	0	0	0	0	0	0	0	0	0	0	0	0	0	0	0	0	0	0	0	0	0	0	0	0
SGN-U221789	SGN-U321481	0	0	0	0	0	0	0	0	0	0	0	0	0	0	0	0	0	0	0	0.164972	0	0	0	0	0	0	0	0	0	0	0	0	0	0	0	0	0	0	0	0	0	0	0	0	0	0	0	0
AF500012	AF500012	0	0	0	0	0	0	0	0	0	0	0	0	0	0	0	0	0	0	0	0	0	0.0633728	0	0	0	0	0	0	0	0	0	0	0	0	0	0	0	0	0	0	0	0	0	0	0	0	0	0
SGN-U218860	SGN-U320278	0	0	0	0	0	0	0	0	0	0	0	0	0	0	0	0	0	0	0	0.0110597	0	0	0	0	0	0	0	0	0	0	0	0	0	0	0	0	0	0	0	0	0	0	0	0	0	0	0	0
SGN-U215086	SGN-U315913	0	0	0	0	0	0	0	0	0	0	0	0	0	0	0	0	0	0	0	0	0	0	0	0	0	0	0	0	0	0	0	0	0	0	0	0	0	0	0.0636113	0	0	0	0	0	0	0	0	0
SGN-U215944	SGN-U317760	0	0	0	0	0	0	0	0	0	0	0	0	0	0	0	0	0	0	0	0	0	0	0	0	0	0	0	0	0	0	0	0	0	0	0	0	0	0	0	0	-0.200354	0	0	0	0	0	0	0
SGN-U214550	SGN-U315584	0	0	0	0	0.143629	0	0	0	0	0	0	0	0	0	0	0	0	0	0	0	0	0	0	0	0	0	-0.0639163	0	0	0	0	0	0	0	0	0	0	0	0	0.0179967	0	0	0	0	0	0	0.00473063	0
SGN-U215591	SGN-U316627	0	0	0	0	0	0	0	0	0	0	0.0296025	0	0	0	0	-0.000734498	0	0	0	0	0	-0.0625611	0	0	0	0	-0.219769	0	0	0	0	0	0	0	0	0	0	0	0	0	0	0	0	0	0	0	0	0
SGN-U214004	SGN-U313832	0	0	0	0	0	0	0	0	0	0	0	0	0	0	0	0	0	0	0	0	0	0	0	0	0	-0.298115	0	0	0	0	0	0	0	0	0	0	0	0	0	0	-0.28001	0	0	0	0	0	0	0
SGN-U228797	SGN-U331609	0	0	0	0	0	0	0	0	0	0	0	0	0	0	0	0	0	0	0	0	0	0	0	0	0	0	0	0	0	0	0	0	0	0	0	0	0	0	0	0	0	0	0	0	0	0	0	0
U37840	U37840	0	0	0	0	0	0	0	0	0	0	0	0	0	0	0	0	0	0	0	0	0	0	0	0	0	0	0	0	0.159217	0	0	0.0469628	0.219911	0	0	0	0	0	0	0	-0.0296645	0	0	0	0	0	0	0
SGN-U217711	SGN-U318001	0	0	0	0	0	0	0	0	0	0	0	0	0	0	0	0	0	0	0	0	0	0	0	0	0	0	0	0	0	0	0	0	0	0	0	0	0	0	0	0	0	0	0	0	0	0	0	0
SGN-U212875	SGN-U312591	0	0	0	0	0	0	0	0	0	0	0	0	0	0	0	0	0	0	0	0	0	0	0	0	0	0	0	0	0	0	0	0	0	0	0.304479	0	0	0	0	0	0	0	0	0	0	0	0	0
SGN-U222589		0	0	0	0	0	0	0	0	0	0	0	0	0	0	0	0	0	0.16001	0	0	0	0	0	0	0	0	0	0	0	0	0	0	0	0	0	0	0	0	0	0	0	0	0	0	0	0	0	0
SGN-U228429	SGN-U313110	0	0	0	0	0	0	0	0	0	0	0	0	0	0	0	0	0	0	0	0	0	0	0	0	0	0	0	0	0	0	0	0	0	0	0	0	0	0	0	0	0	0	0	0	0	0	0	0
SGN-U215674	SGN-U316790	0	0	0	0	0	0	0	0	0	0	0	0	0	0	0	0	0	0	0	0	0	0	0	0	0	0	0	0	0	0	0	0	0	0	0	0	0	0	0	0	0	0	0	0.0141751	0	0	0	0
L08830	L08830	0	0	0	0	0	0	0	0	0	0	0	0	0	0	0	0	0	0	0	0	0	0	0	0	0	0	0	0	0	0	0	0	0	0	0	0	0	0	0	0	0	0	0	0	0	0	0	0
SGN-U215556	SGN-U316524	0	0	0	0	0	0	0	0	0	0	0	0	0	0	0	0	0	0	0	0	0	0	0	0	0	0	0	0	0	-0.0524948	0	0	0	0	0	0	0	0	0	0	0	0	0	0	0	0	0	0
SGN-U225768	SGN-U327993	0	0	0	0	0	0	0	0	0	0	0	0	0	0	0	0	0	0	0	0	0	0	0	0	0	0	0.139483	0	0	0	0	0	0	0	0	0	0.0490575	0	0	0	0	0	0	0	0	0	0	0
SGN-U218096	SGN-U320228	0	0	0	0	0	0	0	0	0	0	0	0	0	0	0	0	0	0	0	0	0	0	0	0	0	0	0	0	0	0	0	0	0	0	0	0	0	0	0	0	0	0	0	0	0	0	0	0
SGN-U219271		0	0	0	0	0	0	0	0	0	0	0	-0.0645942	0	0	0	0	0	0	0.227894	0	0	0	0	0	0	0	0	0	0	0	0	0	0	0	0	0	0	0	0	0	0	0	0	0	0	0	0	0
SGN-U233328	SGN-U335909	0	0	0	0	0	0	0	0	0	0	0	0	0	0	0	0	0	0	0	0	0	-0.0871643	0	0	0	0	0	0	0	0	0	0	0	0	0	0	0	0	0	0	0.41481	0	0	0	0	0	0	0
SGN-U215277	SGN-U315318	0.00508666	0	0	0	0	0	0	0	0	0	0	0	0	0	0	0	0	0	0	0	0	0	0	0	0	0	0	0	0	0	0	0	0	0	0	0	0	0	0	0	0	0	0	0	0	0	0	0
SGN-U212669	SGN-U313137	0	0	0	0	0	0	0	0	0	0	0	0	0	0	0.0939719	0	0	0	0	0	0	0	0	0	0	0	0	0	0	0	0	0	0	0	0.174099	0	0	0	0	0	0	0	0	0	0	0	0	0
SGN-U213265	SGN-U312965	0	0	0	0	0	0	0	0	0	0	0	0	0	0	0	0	0	0	0	0	0	0	0	0	0	0	0	0	0	0	0	0	0	0	0	0	0	0	0	0	0	0	0	0	0	0	0	0
SGN-U214373	SGN-U314065	0	0	0	0	0	0	0	0	0	0	0	0	0	0	0	0	0	0	0	0	0	0	-0.132411	0	0	0	0	0	0	0	0	0	0	0	0	0	0	0	0	0	0	0	-0.0828053	0	0	0	0	0
SGN-U212885		0	0	0	0	0	0	0	0	0.00743301	0	0	0	0	0	0	0	0	0	0	0	0	0	0	0	0	0	0	0	0	0	0	0	0	0	0	0	0	0	0	0	0	0	0	0	0	0	0	0
SGN-U218174	SGN-U320629	0	0	0	0	0	0	0	0	0	0	0	0	0	0	0	0	0	0	0	0	0	0	0	0	0	0	0	0	0	0	0	0	0	0	0	0	0.0362056	0	0	0	0	0	0	0	0	0	0	0.253076
SGN-U225944	SGN-U327673	0	0	0	0	0	0	0	0	0	0	0	0	0	0	0	0	0	0	0	0	0	0	0	0	0	0	0	0	0	0	0	0	0	0	0	0	0	-0.0101214	0	0	0	0	0	0	0	0	0	0
SGN-U214858	SGN-U315735	0	0	0	0	0	0	0.0854753	0	0	0	0	0	0	0	-0.16161	0	0	0	0	0	0	0	0	0	0	0	-0.107729	0	0	0	0	0	0	0	0	0	0	0	0	0	0	0	0	0	0	0	0	0
SGN-U215940	SGN-U317892	0	0	0	0	0	0	0	0	0	0	0	0	0	0	0	0	0	0	0	0	0	0	0	0	0	0	0	0	0	0	0	0	0	0	0	0	0	0	0	0	0	0	0	0	0	0	-0.241624	0
SGN-U217827	SGN-U320178	0	0	0	0	0	0	0	0	0	0	0	0	0	0	0	0	0	0	0	0	0	0	0	0	0	0	0	0	0	0	0	0	0	0	0	0	0	0	0	0	0	0.125094	0	0	0	0	0	0
SGN-U214000	SGN-U313843	0	0	0	0	0	0	0	0	0	-0.0408516	0	0	0	0	0	0	0	0	0	0	0	0	0	0	0	0	0	0	0	0	0	0	0	0	0	-0.227332	0	0	0	0	0	0	0	0	0	0	0	0
SGN-U215025	SGN-U316144	0	0	0	0	-0.016943	0	0	0	0	0.0299231	0.179523	0	0	0	0	0	0	0	0	0	0	0	0	0	0	0	0	0	0	0	0	0	0	0	0.0438618	0	0	0	0	0	0	0	0	0	0	0	0	0
SGN-U215915	SGN-U317370	0.0611771	0	0	0	0	0	0	0	-0.019344	0	0	0	0	0	0	0	0	0	0	0	0	0	0	0	0	0	0	0	0	0	0	0	0	0	0	0	0	0	0	0	0	0	0	0	0	0	0	0
SGN-U220836	SGN-U322692	0	0	0	0	0	0	0	0	0	0	0	0	0	0.149248	0	0	0	0	0	-0.125923	0	0	0	0	0	0	0	0	0	0	0	0	0	0	0	0	0	0	0	0	0	0	0	0	0	0	0	0
SGN-U215715	SGN-U314444	0	0	0	0	0	0	0	0	0	0	0	0	0	0	0	0	0	0	0	0	0	0	0	0	0	0	0	0	0	0	0	0	0.100124	0	0	0	0	0.223711	0	0	0	0	0	0	0	0	0	0
SGN-U213009	SGN-U312492	0	0	0	0	0	0	0	0	-0.00608861	0	0	0	0	0	0	0	-0.0254253	0	0	0	0	0	0	0	0	0	0	0	0	0	0	0	0	0	0	0	0	0	0	0	0	0	0	0	0	0	0	0
SGN-U217989	SGN-U320072	0	0	0	0	0	0	0	0	0	0	0.0492209	0	0	0	0	0	0	0	0	0	0	0	0	0	0	0	0	0	0	0	0	0	0	0	0	0	0	0	0	0	0	0	0	0	0	0	0	0
SGN-U224880	SGN-U322927	0	0	0	0	0	0	0	0	0	0	0	0	0	0	0	0	0	0	0	0	0	0	0	0	0	0	0	0	0	0	0	0	0	0	0	0	0	0	0	0	0	0	0	0	0	0	0	0
SGN-U220355		0	0	0	0	0	0	0	0	0	0	0	0	0	0	0	0	0	0	0	0	0	0	0	0	0	0	0	0	0	0	0	0	0	0	0	0	0	0	0	0	0	0	0	0	0	0	0	0
SGN-U222131	SGN-U324214	0	0	0	0	0	0	0	0	0	0	0	0	-0.0215427	0.0387061	0	0	0	0	0	0	0	0	0	0	0	0	0	0	0	0	0	0	0	0	0	0	0	0	0	0	0	0	0	0	0	0	0	0
SGN-U214530	SGN-U314984	0	0	0	0	0	0	0	0	0	0	0	0	0	0	0	0	0	0	0	0	0	0	0	0	0	0	0	0	0	0	0	-0.0129238	0	0	0	0	0	0	0	0	0	0	0	0	0	0	0	0
SGN-U213293	SGN-U312445	0	0	0	0	0	0	0	0	0	0	0	0	0	0	0	0	0	0	0	0	0	0	0	0	0	0	0	0	0	0	0	0	0	0	0	0	0	0	0	0	0	0	0	0	0	0	0	0
SGN-U213757	SGN-U313755	0	0	0	0	0	0	0	0	0	0	0	0	0	0	0	0	0	0	0	0	0	0	0.0713687	0	0	0	0	0	0	0	0	0	0	0	0	0	0	0	0	0	0	0	0	0	0	0	0	0
SGN-U218153		0	0	0	0	0	0	0	0	0	0	0	0	0	0	-0.0263593	0	0	0	0	0	0	0	0	0	0	0	0	0	0	0	0	0	0	0	0	0	0	0	0	0	0	0	0	0	0	0	0	0.0012763
SGN-U221188	SGN-U319910	0	0	0	0	0	0	0	0	0	0	0	0	0	0	0	0	0	0	0	0	0	0	0	0	0	0.0838954	0	0	0	0	0	0	0	0	0	0	0	0	0	0	0	0	0	0	0	0	0	0
SGN-U219785	SGN-U334944	0	0	0	-0.00898242	0	0	0	0	0	0	0	0	0	0	0	0	0	0	0	0.209767	0	0	0	0	0	0	0	0	0	0	-0.0481467	0	0	0	0	0	0	0	0	0	0.0176985	0	0	0	0	0	0	0
SGN-U221790	SGN-U323609	0	0	0	0	0	0	0	0	0	0	0	0	0	0	0	0	0	0	0	0	0	0	0	0	0	0	0	0	0	0	0	0	0	0	0	0	0.0314429	0	-0.256814	-0.204952	0	0	0	0	0	0	0	0
SGN-U213002	SGN-U312551	0	0	0	0	0	0	0	0	0	0	0	0	0	0	0	0	0	0	0	0	0	0	0	0	0	0	0	0	0	0	0	0	0	0	0	0	0	0	0	0	0	0	0	0	0	0	0	0
SGN-U215366		0	0	0	0	0	0	0	0	0	0	0	0	0	0	0	0	0	0	0	0	0	0	0	0	0	0	0	0	0	0	0	0	0	0.119152	0	0	0	0	0	0	0	0	0	0	0	0	0	0
SGN-U213210	SGN-U312565	0	0	0	0	0	0	0	0	0	0	0	0	0	0	0	0	0	0	0	0	0	0	0	0	0	0	0	0	0	0	0	0	0	0	0	0	0	0	0	0	0	0	0	0	0	0.0288098	0	0
SGN-U222820	SGN-U325512	0	0	0	0	0	0	0	0	0	0	0	0	0	0	0	0	0	0	0	0	0	0	0	0	0	0	0	0	0	0	0	0	0	0	0	0	0	0	0	0	0	0	0	0	0	0	0	0
SGN-U235037	SGN-U321406	0	0	0	0	0	0	0	0	0	0	0	0	0	0.0471831	0	0	0	-0.102214	0	0	0	0	0	0.0435414	0	0	0	0	0	0	0	0	0	0	0	0	0	0	0	0	0	0	0	0	0	0	0	0
SGN-U214690	SGN-U315393	0	0	0	0	-0.218964	0	0	0	0	0	0	0	0	0	0	0	0	0	0	0	0	0	0	0	0	0	0	0	0	-0.21569	0	0	0	0	0	0	0	0	0	0	0	0	0	0	0	0	-0.0604811	0
SGN-U214782	SGN-U315222	0	0	0	0	0	0	0	0	0	0	0	0	0	0	0	0	0	0	0	0	0	0	0	0	0	0	0	0	0	0	0	0	0	0	0	0	0	0	0.074327	-0.00419565	0	0	0	0	0	0	0	-0.0602872
SGN-U222151	SGN-U325483	0	0	0	0	0	0	0	0	0	0	0	0	0	0	0	0	0	0	0	0	0	0	0	0	0	0	0	0	0	0	0	0	0	0	0	0	0	0	0	0.0526385	0	0	0	0	0	0	0	0
SGN-U229882	SGN-U327834	0.1019	0	0	0	0	0	0	0	0	0	0	-0.215642	0	-0.0275866	0	0	0	0	0	0	0	0	0	0	0	0	0	0	0	0	0	0	0	0	0	0	0	0	0	0	0	0	0	0	0	0	0	0
SGN-U221792	SGN-U322052	0	0	0	0	0	0	0	0	0	0	0	0	0	0	0	0	0	0	0	0	0	0	0	0	0	0	0	0	0	0	0	0.0551356	0	0	0	0	0	0	0	-0.0656863	0	0	0	0	0	0	0	0
SGN-U218776	SGN-U318980	0	0	0	0	0	0	0	0	0	0	0	0	0	0	0	0	0	0	0	0	0	0	0	0	0	0	0	0	0	0	0	0	0	0	0	0	0	0	0	0	0	0	0	0	0	0	0	0
SGN-U221889		0	0	0	0	0	0	0	0	0	0	0	0	0	0	0	0	0	0	0	0	0	0	0	0	0	0	0.13877	0	0	0	0	0	0	0	0	0	0	0	0	0	0	0	0	0	0	0	0	0
SGN-U213968	SGN-U313882	0	0	0	0	0	0	0	0	0	0	0	0	0	0	0	0	0	0	0	0	0	0	0	0	0	0	0	0	0	0	0	0	0	0	0	0	0	0	0	0	0	-0.0730593	0	0	0	0	0	0
SGN-U225791	SGN-U323102	0	0	0	0	0	0	0	0	-0.037358	0	0	0	0	0	0	0	0	0	0	0	0	0	0	0	0	0	0	0	0	0.145442	0	0	0	0	0	0	0	0	0	0	0	0	0	0	0	0	0	0
SGN-U217204	SGN-U319028	0	0	0	0	-0.0509344	0	0	0	0	0	0	0	0	0	0.0108435	0	0	0	0	0	0	0	0	0	0	0	0	0	0	0	0	0	0	0	0	0	0	0	0	0	0	0	0	0	0	0	0	0
SGN-U216609	SGN-U316772	0	0	0	0	0	0	0	0	0	0	0	0	0	0	0	0	0	-0.0379313	0	0	0	0	0	0	0	0	0	0	0	0	0	0	0	0	0	0	0	0	0	0	0	0	0	0	0	0	0	0
SGN-U218539	SGN-U320978	0	0	0	0	0	0	0	0	0	0	0	0	0	0	0	0	0	0	0	0	0	0	0	0	0	0	0	0	0	0	0	0	0	0	0	0	0	0	0	0	0	0	0	0	0	0	0	0
SGN-U216037	SGN-U316646	0	0	0	0	0	0	0	0	0	0	0	0	0	0	0	0	0	0	0	0	0	0	0	0	0	0	0	0	0	0	0.0352095	0	0	0	0	0	0	0	0	0	0	0	0	0	0	0	0	0
SGN-U216826	SGN-U317391	0	0	0	0	0	0	0	0	0	0	0	0	0	0	0	0	0	0	0	0	0	0	0	0	0	0.0821632	0	0	0	0	0	0	0	0	0	0	0	0	0	0	0	0	0	0	0	0	0	0
SGN-U219847	SGN-U320711	0	0	0	0	0	0	0	0	0	0	-0.0620313	0	0	0	0	0	0	0	0	0	0	0	0	0	0	0	0	0	0	0	0	0	0	0	0	0	0	0	0	0	0	0	0	0	0	0	0	0
SGN-U213810		0	0	0	0	0	0	0	0	0	0	0	-0.304517	0	0	0	0	0	0	0	0	0	0	0	0	0	0	0	0	0	0	0	0	0	0	0.0929067	0	0	0	0	-0.0533115	0	0	0	0	0	0	0	0
SGN-U216355	SGN-U317923	0	0	0	0	0	0	0	0	0	0	0	0	0	0	0	0	0	0	0	0	0	0	0	0	-0.0244277	0	0	0	0	0	0	0	0	0	0	0	0	0	0	0	0	0	0	0	0	0	0	0
SGN-U212918	SGN-U312415	0	0	0	0.449867	0	0	0	0	0	0.0191781	0.150208	0.132614	0	0.0362172	0	0	0.0308582	0	0	0	0	0	0.367513	0.280373	0	0	0	0	0	0	0	0	0	0	0	0	0	0	0.410713	0.0952035	0	0	0	0.188131	0	0	0.0442895	0
SGN-U213679	SGN-U313787	0	0	0	0	0	0	0	0.0372027	0	0	0	0	0	0	0	0	0	0	0	0	0	0	0	0	0	0	0	0	0	0	0	0	0	0	0	0	0	0.0667957	0	0	0	0	0	0	0	0	0	0
SGN-U228237	SGN-U321591	0	0	0	0	0	0	0	0	0	0	0	0	0	-0.343658	0	0	0	0	0	0	0	0	0	0	0	0	0	0	0	0	0	0	0	0	0	0	0	0	0	0	0	0	0	-0.0852908	0	0	0	0
SGN-U217789	SGN-U317783	0	0	0	0	0	0	0	0	0	0	0	0	0	0	0	0	0	0	0	0	0	0	0	0	0	0	0	0	0	0	0	0	0	0	0	0	0	0	0	0	0	0	0	0	0	0	0	0
SGN-U215998		0	0	0	0	0	0	0	0	0	0	0	0	0	0	0	0	0	0	0	0	0	0	0	0	0	0	0	0	0	0	0	0	-0.00642297	0	0	0	0	0	0	0	0	0	0	0	0	0	0	0
SGN-U230576		0	0	0	0	0	0	0	0	0	0	0	0	0	0	0	0	-0.0336571	0	0	0	-0.0939808	0	0	0	0	0	0	0	0	0	0	0	0	0	0	0	0	0	0	0	0	0	0	-0.138189	0	0	0	0
SGN-U215965	SGN-U314712	-0.186447	0	0	0	0	0	0	0	0	0	0	0	0	0	0	0	0	0	0	0	0	0	0	0	0	0	0	0	0	0	0	0	0	0	0	0	0	0	0	0	0	0	0.160305	0	0	0	0	0
SGN-U214230	SGN-U315089	0	0	0	-0.154168	0	0	0	0	0	0	0	0	0	0	0	0	0	0	0	0	0	0	0	0	0	0	0	0	0	0	0	0	0	0	0	0	0	0	0	0	0	0	0	0	0	0	0	0
SGN-U213789		0	0	0	0	0	0	0	0	0	0	0	0	0	0	0	0	0	0	0	0	0	0	0	0	0	0	0	0	0	0	0	0	0	0	0	0	0	0	0	0	0	0	0	0	0	0	0	0
SGN-U215435		0	0	-0.122148	0	0	0	0	-0.0678276	0.17359	0	0	0	0	0.222051	0	0	0	0	0	0	0	0	0	0	0	0	0	0	0.410414	0	0	0	0	0	0	0	0	0	0	0	0	0	0	0	0	0	0	0
SGN-U217447	SGN-U318619	0	0	0	0	0	0	0.490816	0	0	0	0	0	0	0	0	0	0	0	0	0	0	0	0	0	0	0	0	0	0	0	0	0	0	0	0.273852	0	0	0	0	0	0	0	-0.0275048	0	0	0	0	0
SGN-U214101	SGN-U314188	0	0	0	0	0	0	0	0	0	0	0	0	0	0	0	0	0	0	0	0	0	0	0	0	0	0	0	0	0	0	0	0	0	0	0	0	0	0	0	0	0	0	0	0	0	0	0	0.0972784
SGN-U233298		0	0	0	0	0	0	0	0	0	0	0	0	0	0	0	0	0	0	0	0	0	0	0	0	0	0	0	0	0	0	0	0	0	0	0	0.0207393	0	0	0	0	0	0	0	0	0	0	0	0
SGN-U217047	SGN-U318915	0	0	0	0	0	0	0	0	0	0	0	0	0	0	0	0	0	0	0	0	0	0	-0.0154573	0	0	0	0	0	0	0	0	0	0	0	0	0	0	0	0	0	0	0	0	0	0	0	0	0
SGN-U216421	SGN-U316947	0	0	0	0	0	0	0	0	0	0	0	0	0	0	0	0	0	0	0	0	0	0	0	0	0	0	0	0	0	0	0	0	0	0	0	0	0	0	0	-0.0572425	0	0	0	0	0	0	0	0
SGN-U214621	SGN-U314143	0	0	0	0	0	0	0	0	0	0	0	0	0	0	0	0	0	0	0	0.0295379	0	0	0	0	0	0	0	0	0	0	0	0	0	0	0	0	0	0	0	0	0	0	0	0	0	0	0	0
SGN-U220753		0	0	0	0	0	0	0	0	0	0	0	0	0	0	0	0.0100652	0	0	0	0	0	0	0	0	0	0	0	0	0	0	0	0	0	0	0	0	0	0	0	0	0	0	0	0	0	0	0	0
SGN-U231712	SGN-U324169	0	0	0	0	0	0	0	0	-0.0164134	0	0	0	0	0	0	-0.0984608	0.118124	0	0	0	0	0	0.0356283	0	0	0	0	0	0	0	0	0	0	0	0	0	0	0	0	-0.030761	0	0	0	0	0	0	0	0
SGN-U223279		0	0	0	0	0	0	0	0	0	0	0	0	0	0	0	0	0	0	0	0	0	0	0	0	0	0	0	0	0	0	0	0	0	0	0	0	0	0	0	0	0	0	0	0	0	0	0	0
SGN-U214336	SGN-U315026	0	0	0	0	0	0	0	0	0	0	0	0	0	0	0	0.0513157	0	0	0	0	0	0	0	0	0	0	0	0	0	0	0	0	0	0	0	0	0	0	0	0	0	0	0	0	0	0	0	0
SGN-U213892	SGN-U313448	0	0	-0.0846026	0	0	0	0	0	0	0	0	0.200073	0	0	0	0	0	0	0	0	0	0	0	0	0	0	0	0	0	0	0	0	0	0	0	-0.0399236	0	0	0	0	0	0	0	0	0	0	0	0
SGN-U214929	SGN-U315889	0	0	0	0	0	0	0	0	0	0	0	0	0	0	0	0	0	0	0	0	0	0	-0.0181084	-0.106951	-0.0381771	0	0	0	0	0	0	0	0	0	0	0	0	-0.124526	0	0	0	0	0	0	0	0	0	0
SGN-U224704	SGN-U325500	0	0	0	0	0	0	0	0	0	0	0	0	0	0	0	0	0	0	0	0	0	0	0	0	0	0	0.0898829	0	0	0	0	0	0	0	0	0	0	0	0	0	0	0	0	0	-0.14599	0	0	0
SGN-U217808	SGN-U318918	0	0	0	0	0	0	0	0	0	0	0	0	0	0	0	0	0	0	0	0	0	0	0	0	0	0	0	0	0	0	0	0	0	0	0	0	0	0	0	0	0	0	0	0	0	0	0	0
SGN-U221716	SGN-U323916	0	0	0	0	0	0	0	0	0	0	0	0	0	0	0	0	-0.0353104	0	0	0	0	0	0	0	0	0	0	0	0	0	0	0	0	0	0	0	0	0	0	0	0	0	0	0	0	0	0	0
SGN-U213463	SGN-U313505	0	0	0	0	0	0	0	0	0	0	0	0	0	0	0	0	0	0	0	0	0	0	0	0	0	0	0	0	0	0	0	0	0	0	0	0	0	0	0.0907843	0	0	0	0	0	0	0	0	0
SGN-U221219	SGN-U324176	0	0	-0.0612963	0	0	0	0	0	0	0	0	0	0	0	0	0	0	0	0	0	0	0	0	0.0975949	0	0	0	0	0	0	0	0	0	0	0	0	0	0	0	0	0	0	0	0	0	0	0	0
SGN-U217390	SGN-U318604	0	0	0	0	0	0	0	0	0	0	0	0	0	0	0	0	0	0	0	0	0	0	0	0	0	0	0	0	0	0	0	0	0	0	0	0	0	0	0	0	0	0	0	0	0	0.0151959	0	0
SGN-U216210	SGN-U317218	0	0	0	0	0	0	0	0	0	0	0	0	0	0	0	0	0	0	0	0	0	0	0	0	0	0	0	0	0	0	0	0	0	0	0	0	0	0	0	0	0	0	0	0	0	0	0	0
SGN-U221357		0	0	0	0	0	0	0	0	0	0	0	0	0	0	0	0	0	0	0	0	0.0141839	0	0	0	0	0	0	0	0	0	0	0	0	0	0	0	0	0	0	0	0	0	0.0497103	0	0	0	0	0
SGN-U213834	SGN-U313711	0	0	0	0	0	0	0	0	0	0	0	0	0	0	0	0	0	0	0	0	0	0	0	0	0	0	0	0	0	0	0	0	0	0	0	0	0	0	0	0	0	0	0	0	0	0	0	0
SGN-U214066	SGN-U314303	0	0	0	0	0	0	0	0	0	0	0	0	-0.224106	0	0	0.104389	0	0	0	0	0	0	0	0	0	0	0	0	0	0	0	0	0	0	0	0	0	-0.121323	0	-0.00453833	0	0	0	0	0	0	0	0
SGN-U218198	SGN-U319638	0	0	0	0	0.0730948	0	0	0	0	0	0	0	0	0	0	0	0	0	0	0	0	0	0	0	0	0	0	0	0	0	0	0	0	0	0	0	0	0	0	0	0	0	0	0	0	0	0	0
SGN-U212829		0	0	0	0	0	0	0	0	0	0	0	0	0	0	0	0	0	0	0	0	0	0	0	0	0	0	0	0	0	0	0	0	0	0	0	0	0	0	0	0	0	0	0	0	0	0	0	0
SGN-U232590	SGN-U334227	0	0	0	0	0	0	0	0	0	0	0	0	0	0	0	0	0	0.039076	0	0	0	0	0	0	0	0	0	0	0	0.000811773	0	0	0	0	0	0	0	0	0	0	0	0	0	0	0	0	0	0
SGN-U219767	SGN-U320678	0	0	0	0	0	0	0	0	0	0	0	0	0	0	0	0	0	0	0	0	0	0	0	0	0	0	0	0	0	0	0	0	0	0	0	0	0	0	0	0	0	0	0	0	0	0	0	0
SGN-U217153	SGN-U319229	0	0	0	0	0	0	0	0	0	0	0	0	0	0	0	0	0	0	0	0	0	0	0	0	0	0	0	0	0.164272	0.185056	0	0	0	0	0	0	0	0	0	0	0	0	0	0	-0.212435	0	0	0
SGN-U217278	SGN-U316652	0	0	0	0	0	0	0	0	0	0	0	0	0	-0.157534	0	0	0	0	0	0	0	0	0	0	0	0	0	0	0	0	0	0	0	0	0	0	0	0	0	0	0	0	0	0	0	0	0	0
SGN-U223015	SGN-U325383	0	0	0	0	0	0	0	0	0	0	0	0	0	0	0	0	0	0	0	0	0	0	0	0	0	0	0	0	0	0	0	0	0	0	0	0	0	0	0	0	0	0	0	0	0	0	0	0
SGN-U216272	SGN-U316761	0	0	0	0	0	0	0	0	0	0	0	0.0591416	0	0	0	0	0	0	0	0	0	0	0	0	0	0	0	0	0	0	0	0	0	0	0	0	0	0	0	0	0	0	0.151425	0	0	0	0	0
SGN-U223178	SGN-U318572	0	0	0	0	0	0	0	0	0	0	0	0	0	0	0	0	0	0	0	0	0	0	0	0	0	0	0	0	0	0	0	0	0	0	0	0	0	0	0	0.00997107	0	0	-0.100831	0	0	0	0	0
SGN-U219681	SGN-U321325	0	0	0	0	0	0	0	0	0	0	0	0	0	0	0	0	0	0	0	0	0	0	0	0	0	0	0	0	0	0	0	0	0	0	0	0	0	0	0	0	0	0	0	0	0	0	0	0
SGN-U221971	SGN-U325636	0	0	0	0	0	0	0	0	0	0	0	0	0	0	0	0	0	0	0	-0.0624257	0	0	0	0	0	0	0	0	0	0	0	0	0	0	0	0	0	0	0	0	0	0	0	0	0	0	0	0
SGN-U221990	SGN-U325547	0	0	0	0	0.074165	0	0	0	0	0	0	0	0	0	0	0	0	0	0	0	0	0	0	0	0	0	0	0	0	0	0	0	0	0	0	0	0	0	0	0	0	0	0	0	0	0	0	0
SGN-U212922	SGN-U314797	0	0	0	0	0	0	0	0	0	0	0	0	0	0	0	0	0	0	0	0	0	0	0	0	0	0	0	0	0	0	0	0	0	0	0	0	0	0	0	0	0	0	0	0	0	0	0	0
SGN-U214149	SGN-U314064	0	0	0	0	0.000315244	0	0	0	0	0	0	0	0	0	0	0	0	0	0	0	0	0	0	0	0	0	0	0	0	0	0	0.029486	0	0	0	0	0	0	0	0	0	0	0	0	0	0	0	0
SGN-U219621	SGN-U321041	0	0	0	0	0	0	0	0	0	0	0	0	0	0	0	0	0	0	0	0	0	0	0	0	0	0	0	0	0	0	0	0	0	0	0	0	0	0	0	0	0	0	0	0	0	-0.00938846	0	0
SGN-U216023	SGN-U314988	0	0	0	0	0	0	0	0	0	0	0	0	0	0	0	0	-0.348741	0	0	0	-0.00840964	0	0	0	0	0	0	0	0	0	0	0	0	0	0	0	0	0	0	0	0	0	0	0	0	0	0	0
SGN-U238404	SGN-U346869	0	0	0	0	0	0	0	0	0	0	0	0	0	0	0	0	0	0	0	0	0	0	0	0	0	0	0	0	0	0	0	0	0	0	0	0	0	0	0	0	0	0	0	0	0	0	0	0
SGN-U217144	SGN-U319364	0	0	0	0	0.054629	0	0	0	0	0	0	0	0	0	0	0	0	0	0	0	0	0	0	0	0	0	0	0	0	0	0	0	0	0	0	0	0	0	0	0	0	0	0	0	0	0	0	0
SGN-U227495	SGN-U323493	0	0	0	0	0	0	0	0	0	0	0	0	0	0	0	0	0	0	0	0	0	0	0	0	0	0	0	0	0	0	0	0	0	0	0	0	0	0	0	0	0	0	0	0	0	0	0	0
SGN-U220798	SGN-U317743	0	0	0	0	0	0	0	-0.141613	0	0	0	0	0	0	0	0	0	0	0	0	0	0	0	0	-0.197174	0	0	0	0	0	0	0	0	0	0	0	0	0	0	0	0	0	0	0	0	0	0	0
SGN-U213827	SGN-U313661	0	0	0	0	0	0	0	0	0	0	0.0700323	0	0	0	0	0	0	0	0	0	0	0	0	0	0	0	0	0	0	0	0	0	0	0	0	0	0	0	0	0	0	0	0	0	0	0	0	0
SGN-U228047		0	0	0	0	0	0	0	0	0	0	0	0	0	0	0.00796624	0	0	0	0	0	0	0	0	0	0	0	0	0	0.069681	0	0	0	0.0897174	0	0	0	0	0	0	0	0	0	0	0	0	-0.106043	0	0
SGN-U222728	SGN-U324061	0	0	0	0	0	0	0	-0.106289	0	0	0	0	0	0	0	0	0	0	0	0	0	0	0	0	0	0	0	0	0	0	0	0	0	0	0	0	0	0	0	0	0	0	0	0	0	0	0	0
SGN-U213393	SGN-U313462	0	0	0	0	0	0	0	0	0	0	0	0	0	0	0	0	0	0	0	0	0	0	0	0	0	0	0	0	0	0	0	0	0	0	0	0	0	0	0	0	0	0	0	0	0	0	0	0
SGN-U224032	SGN-U324114	0	0	0	0	0	0	0	0	0	0	0	0	0	0	0	0	0	0	0	0	0	0	0	0	0.000345017	0	0	0	0	0	0	0	0	0	0	0	0	0	0	0	0	0	0	0	0	0	0	0
SGN-U216516	SGN-U318235	0	0	0	0	0	0	0	0	0	0	0	0	0	0	0	0	0	0	0	0	0	0.00445583	0	0	0	0	0	0	0	0	0	0	0	0	0	0	0	0	0	0	0	0	0	0	0	0	0	0
SGN-U217898		0	0	0	0	0	0	0	0	0	0	0	0	0	0	0	0	0	0	0	0	0	0	0	0	0	0	0	-0.0467493	0	0	0	-0.0685251	0	0	0	0	0	0	0	0	0	0	0	0	0	0	0	0
SGN-U216933	SGN-U317951	0	0	0	0	0	0	0	0	0	0	0	0	0	0	0	0	0	0	0	0	0	0	0	0	0	0	0	0	0	0	0	0	0	0	0	0	0	0	0	0	0	0	0	0	0	0	0	0
SGN-U218445		0.0383271	0	0	0	0.0226265	0	0	0	0	0	0	0	0	0	0	0	0	0	0	0	0	0	0	0	0	0	0	0	0	0	0	0	-0.136036	0	0	0	0	0	0	0	0	0	0	0	0	0	0	0
SGN-U220811	SGN-U322007	0	0	0	0	0	0	0	0	0	0	0	0	0	0	0	0	0	0	0	0	0	0	0	0	0	0	0	0	0	0	0	0	0	0	0	0	0	0	0	0.10006	0	0	0	0	0	0	-0.0378954	0
SGN-U213502	SGN-U312485	0	0	0	0	0	0	0	0	0	0	0	0.689461	0.302285	0	0	0	0	0	0	0	0	0	0	0.0206895	0	0	0	0	0	0	0	0	0	0	0	0	0	0	0.0059462	0	0	0	0	0	0	0	0	0
SGN-U216273	SGN-U313134	0	0	0	0	0	0	0	0	0	0	0	0	0	0	0	0	-0.0728811	0	0	0	0	0	0	0	0	0	0	0	0	0	0	0	0	0	0	0	0	0	0	0	0	0	0	0	0	0	0	0
SGN-U236496	SGN-U346814	0	0	0	0	0.163616	0	0	0	0	0	0	0	0	0	0	0	0	0	-0.107314	0	0	0	0	0	0	0	0	0	0	0	0	0	0	0	0	0	0	0	0	0	0	0	0	0	0	0	0	0
[truncated: 206 more columns]

## Sheet: metabolites
Metabolites	Predictor genes
atocopherol_FW	SGN-U220352	-0.145665	SGN-U216342_SGN-U316334	0.04201	SGN-U225550_SGN-U319077	0.0310215	SGN-U224725_SGN-U327413	-0.0285614	SGN-U213536_SGN-U313302	-0.052308	SGN-U221324_SGN-U323398	-0.0475142	SGN-U218503	0.0846706	SGN-U217465_SGN-U319104	-0.147433	SGN-U221041_SGN-U322362	0.153753	SGN-U219098_SGN-U320411	0.0520121	SGN-U226278	0.0375222	SGN-U222008_SGN-U321710	0.0303456	SGN-U215820_SGN-U317504	-0.0479118	SGN-U220526_SGN-U322449	0.00361963	SGN-U216789	-0.148056	SGN-U213805_SGN-U313490	0.0930433	SGN-U212883_SGN-U312562	0.0347527	SGN-U226121_SGN-U328040	-0.0315967	SGN-U225944_SGN-U327673	-0.085104	SGN-U222151_SGN-U325483	0.186963	SGN-U212918_SGN-U312415	0.0161374
bcaroteno_FW	SGN-U221253_SGN-U324134	0.256659	SGN-U227770_SGN-U327664	-0.229656	SGN-U215220	-0.0300582	SGN-U226869	-0.109875	SGN-U227294_SGN-U323446	0.0105838	SGN-U218125_SGN-U319453	-0.0173848	SGN-U214943_SGN-U314973	0.0941375	SGN-U220271_SGN-U322000	-0.218182	SGN-U214072_SGN-U314996	0.00214162	SGN-U231725_SGN-U327192	-0.0721344	SGN-U220770_SGN-U319497	-0.0294035	SGN-U221446	0.0144781	SGN-U213757_SGN-U313755	0.230583	SGN-U222151_SGN-U325483	0.0355814	SGN-U217278_SGN-U316652	-0.0704401	SGN-U216023_SGN-U314988	-0.0787022
Lycopene_FW	SGN-U224300_SGN-U326276	0.0179471	SGN-U213872_SGN-U314730	0.213284	SGN-U212780_SGN-U314554	0.421838	SGN-U228776_SGN-U327674	0.0911244	SGN-U224267_SGN-U327001	-0.0918514	SGN-U223177_SGN-U325415	-0.178926	SGN-U235586_SGN-U346847	-0.0098233	SGN-U214856_SGN-U315271	-0.00491277	SGN-U218428_SGN-U320902	0.0160468	SGN-U220542_SGN-U323369	-0.0165659	SGN-U216871_SGN-U313454	-0.0329102	SGN-U212667_SGN-U314668	-0.238714	SGN-U230576	-0.0311394	SGN-U216933_SGN-U317951	-0.134917
Titratable_acidity	SGN-U213179_SGN-U312782	-0.00982331	SGN-U217078	0.131961	SGN-U213550_SGN-U313413	-0.0223728	SGN-U214015_SGN-U314235	-0.00505262	SGN-U213218_SGN-U313171	0.0486999	SGN-U218409_SGN-U319990	0.0796749	SGN-U219644_SGN-U322372	0.0404329	SGN-U217077_SGN-U320958	0.148923	SGN-U221559_SGN-U322067	0.160808	SGN-U213238_SGN-U312999	0.0262171	SGN-U219149_SGN-U318956	-0.0958863	SGN-U213709_SGN-U313759	-0.111274	SGN-U220322_SGN-U322738	-0.0320826	SGN-U216199_SGN-U317845	-0.0334568	SGN-U216275_SGN-U317121	0.154771	SGN-U219086_SGN-U320479	0.0317927	SGN-U221818_SGN-U323011	0.0281094	SGN-U222145_SGN-U322875	0.140426	SGN-U222589	0.182052	SGN-U212669_SGN-U313137	0.0161848
TSS	SGN-U215786_SGN-U315959	0.0325289	SGN-U219740_SGN-U321742	-0.099351	SGN-U213091_SGN-U312764	0.180666	SGN-U217465_SGN-U319104	-0.0899413	SGN-U219304	0.181298	SGN-U213604_SGN-U313426	0.157925	SGN-U216101_SGN-U317400	0.0760779	SGN-U221439	0.138035	SGN-U223834_SGN-U325107	0.0558157	SGN-U218240	-0.00669214	SGN-U217320_SGN-U319140	0.00562542	SGN-U217775_SGN-U317754	-0.0220985	SGN-U219877_SGN-U318472	-0.0803142	SGN-U222649_SGN-U321363	0.063046	SGN-U225791_SGN-U323102	-0.00377654	SGN-U219621_SGN-U321041	0.306809
Citric_acid	SGN-U213952_SGN-U315380	0.135115	SGN-U216554_SGN-U318609	0.0456264	SGN-U226549_SGN-U325285	0.00318356	SGN-U217865_SGN-U319089	0.153889	SGN-U224995	0.0645619	SGN-U215685_SGN-U316940	0.00570034	SGN-U218271	0.0424787	SGN-U225014_SGN-U327436	0.0625962	SGN-U216072_SGN-U317173	0.0838641	SGN-U218491	-0.0897543	SGN-U218646_SGN-U318736	0.0287071	SGN-U223646_SGN-U320091	0.00629003	SGN-U219912	-0.146904	SGN-U223374_SGN-U326769	0.0231424	SGN-U222180_SGN-U322484	0.116044	SGN-U227634_SGN-U318308	-0.0449395	SGN-U212847_SGN-U314880	0.00969422	SGN-U215351	0.00837495	SGN-U227307_SGN-U328236	-0.0396645	SGN-U224754_SGN-U326922	0.0894671	SGN-U214257_SGN-U315070	0.0736353	SGN-U215025_SGN-U316144	0.0206992	SGN-U216273_SGN-U313134	-0.205669
Fructose	SGN-U221854_SGN-U322938	0.0437516	SGN-U218373_SGN-U319754	0.153149	SGN-U217119_SGN-U319390	0.0767893	Y14810_Y14810	0.077108	SGN-U212889_SGN-U312547	-0.041793	SGN-U234985_SGN-U326323	0.214796	M32606	-0.0222339	SGN-U216219_SGN-U317631	0.031998	SGN-U229620_SGN-U332761	-0.00811597	SGN-U214963_SGN-U316043	-0.0366584	SGN-U215149_SGN-U314636	-0.0751235	SGN-U212914_SGN-U314405	0.0487043	SGN-U230612	0.108077	SGN-U213805_SGN-U313490	0.0390558	SGN-U213725_SGN-U312510	0.054997	SGN-U220882_SGN-U319988	0.0743164	SGN-U213118_SGN-U312786	-0.0496481	SGN-U217575_SGN-U317733	-0.0145723	SGN-U213584_SGN-U313416	0.0204501	SGN-U224754_SGN-U326922	-0.136826	SGN-U213265_SGN-U312965	-0.0869874	SGN-U218539_SGN-U320978	0.0848497
Glucose	SGN-U226366_SGN-U320763	0.0959804	SGN-U219794_SGN-U322374	-0.034538	SGN-U217119_SGN-U319390	0.0480258	SGN-U215227_SGN-U315809	0.0976491	SGN-U214890_SGN-U315726	0.0104746	SGN-U215057_SGN-U315252	-0.00810887	SGN-U219314_SGN-U318346	-0.0201964	SGN-U219932_SGN-U317823	-0.0139285	SGN-U214480_SGN-U312632	-0.0972574	SGN-U216352_SGN-U317682	0.0166285	SGN-U213977_SGN-U314151	0.00123959	SGN-U218274_SGN-U319637	-0.0577309	SGN-U236515_SGN-U342906	-0.0696969	SGN-U216449_SGN-U317247	0.0178698	SGN-U212974_SGN-U314621	0.0185751	SGN-U213805_SGN-U313490	0.0452287	SGN-U216644_SGN-U335584	0.108423	SGN-U213118_SGN-U312786	-0.0168651	SGN-U217575_SGN-U317733	-0.142799	SGN-U215600_SGN-U316715	-0.137217	SGN-U215261_SGN-U315165	0.0277551	SGN-U231373_SGN-U330639	-0.0815918	SGN-U224720_SGN-U334905	0.131532	SGN-U225120_SGN-U325480	0.142289	SGN-U215944_SGN-U317760
Malic_acid	SGN-U225854	0.0677116	SGN-U215685_SGN-U316940	0.0632603	SGN-U227559_SGN-U327149	0.046608	SGN-U219265_SGN-U321161	0.345238	SGN-U218453_SGN-U315238	0.0626699	SGN-U220104_SGN-U322799	0.158853	SGN-U224146_SGN-U325958	0.0624153	SGN-U219314_SGN-U318346	0.0269964	SGN-U215760_SGN-U317562	-0.0700598	SGN-U220586_SGN-U323385	-0.115753	SGN-U214001_SGN-U314062	0.0117495	SGN-U227329_SGN-U329772	-0.0345634	SGN-U231465_SGN-U330652	-0.0173403	SGN-U223646_SGN-U320091	0.0209731	SGN-U217023_SGN-U318047	-0.00306423	SGN-U218343_SGN-U320295	0.01516	SGN-U215800_SGN-U316687	-0.225547	SGN-U224754_SGN-U326922	0.0825337	SGN-U220798_SGN-U317743	0.0695031
Sucrose	SGN-U216816_SGN-U318433	0.0157423	SGN-U219153_SGN-U319248	-0.114485	SGN-U225529_SGN-U314252	-0.0831411	AJ224356_AJ224356	0.00461064	SGN-U213767_SGN-U313553	0.114415	SGN-U221459_SGN-U321667	-0.00290529	SGN-U219877_SGN-U318472	-0.262902	SGN-U216406	-0.14672	SGN-U229631_SGN-U332575	0.0545199	SGN-U239979_SGN-U319317	-0.0330509	SGN-U218153	0.214814	SGN-U214690_SGN-U315393	-0.0260856	SGN-U229882_SGN-U327834	0.289824	SGN-U224704_SGN-U325500	0.136786
Vitamine_C	SGN-U225784_SGN-U329839	0.0694865	SGN-U213698_SGN-U313698	-0.132735	SGN-U213052_SGN-U312789	0.110523	SGN-U217971_SGN-U318461	0.00574846	SGN-U232238_SGN-U333748	0.116028	SGN-U213351_SGN-U313409	0.167387	SGN-U213323_SGN-U313209	-0.17104	SGN-U218016_SGN-U318912	0.0782296	SGN-U222369_SGN-U325749	0.115183	SGN-U216694_SGN-U318445	-0.0763787	SGN-U214599_SGN-U315971	-0.027992	SGN-U218096_SGN-U320228	-0.0033345	SGN-U213009_SGN-U312492	0.002264	SGN-U217447_SGN-U318619	0.200601	SGN-U217808_SGN-U318918	-0.0582644	SGN-U212829	-0.164805
Ethanol	SGN-U221253_SGN-U324134	-0.110602	SGN-U222408_SGN-U323656	0.0510817	SGN-U223719_SGN-U321747	-0.0405222	SGN-U231674_SGN-U326048	0.134533	SGN-U216505_SGN-U316323	0.184615	SGN-U214169_SGN-U314089	-0.0369112	SGN-U216293_SGN-U317589	0.094629	SGN-U216921	-0.0428834	SGN-U224723	0.0774795	SGN-U227967_SGN-U325380	-0.0170466	SGN-U222961_SGN-U319693	-0.0488346	SGN-U225534_SGN-U314718	0.102279	SGN-U215785	0.208874	SGN-U221789_SGN-U321481	-0.0729952	SGN-U220836_SGN-U322692	0.276714
Acetone	SGN-U227476_SGN-U328055	-0.326969	SGN-U213164_SGN-U312754	0.151854	SGN-U227976_SGN-U327022	0.0291021	SGN-U220628_SGN-U323280	-0.0275909	SGN-U241745	0.143354	SGN-U216293_SGN-U317589	-0.178956	SGN-U216539_SGN-U317653	0.0398541	SGN-U217893_SGN-U318499	-0.0166531	SGN-U213351_SGN-U313409	0.140656	SGN-U215416_SGN-U316127	-0.0155623	SGN-U221272_SGN-U323030	-0.00605402	SGN-U212711	-0.0543335	SGN-U213616_SGN-U334029	-0.132195	SGN-U214782_SGN-U315222	-0.180158	SGN-U213810	-0.0048314	SGN-U238404_SGN-U346869	-0.0101464	SGN-U217144_SGN-U319364	-0.0417297
iimethylpropanal	SGN-U225843_SGN-U327962	-0.0412522	SGN-U213952_SGN-U315380	0.08659	SGN-U218173_SGN-U320525	0.0824337	SGN-U213013	-0.0118519	SGN-U214772_SGN-U315719	0.00383997	SGN-U213250_SGN-U312918	-0.0365803	SGN-U215695_SGN-U316851	-0.0557677	SGN-U214298_SGN-U315127	-0.0371654	SGN-U227342_SGN-U320398	-0.0662663	SGN-U218339_SGN-U319965	-0.157735	SGN-U236001	0.0247781	SGN-U226566_SGN-U323602	0.152079	SGN-U217775_SGN-U317754	-0.0207705	SGN-U220731_SGN-U323142	-0.116846	SGN-U215320_SGN-U316092	-0.177943	SGN-U221789_SGN-U321481	0.0272052	SGN-U213789	-0.231692	SGN-U213502_SGN-U312485	0.169204
iimethyl1propanol	SGN-U216816_SGN-U318433	0.106078	SGN-U216342_SGN-U316334	-0.0186876	SGN-U228261_SGN-U331538	0.0972517	SGN-U212800_SGN-U314498	-0.0147632	SGN-U212765	-0.0876808	SGN-U221824_SGN-U312511	-0.12756	SGN-U219337_SGN-U318382	0.0833286	SGN-U217224_SGN-U318545	-0.00559059	SGN-U218118_SGN-U318794	-0.118224	SGN-U220938_SGN-U323749	-0.0703714	SGN-U219811_SGN-U322016	0.0542898	SGN-U216488_SGN-U318196	-0.0487999	SGN-U214053_SGN-U313373	-0.0683994	SGN-U220964_SGN-U323638	0.0150491	SGN-U220322_SGN-U322738	-0.0266055	SGN-U214570_SGN-U317084	-0.102356	SGN-U214040_SGN-U313720	-0.025577	SGN-U215642_SGN-U315461	-0.0395297	SGN-U222753_SGN-U323312	-0.0164025	SGN-U218414_SGN-U316868	0.0707162	SGN-U213968_SGN-U313882	-0.0489337	SGN-U219767_SGN-U320678	-0.00105048	SGN-U219681_SGN-U321325	0.0580349	SGN-U214149_SGN-U314064	0.19472
iiimethylbutanal	SGN-U220297_SGN-U320219	0.243569	SGN-U221418_SGN-U324429	-0.0970117	SGN-U215635_SGN-U317352	-0.0370177	SGN-U218812_SGN-U319158	-0.0106472	SGN-U216427_SGN-U317705	0.116811	SGN-U218589_SGN-U320090	-0.163898	SGN-U218502_SGN-U316803	0.00150749	SGN-U213916_SGN-U313853	-0.0254467	SGN-U218890_SGN-U320038	0.0780122	SGN-U213674_SGN-U313515	-0.199782	SGN-U220042_SGN-U321233	-0.0375284	SGN-U218565_SGN-U320674	0.0381801	SGN-U217844_SGN-U319787	-0.0287344	SGN-U214919_SGN-U315203	-0.0796725	SGN-U214004_SGN-U313832	0.197202	SGN-U213002_SGN-U312551	0.0360741	SGN-U214066_SGN-U314303	-0.108906
Butanol	SGN-U216651_SGN-U318233	-0.0170272	SGN-U226444_SGN-U321157	0.0302932	SGN-U219819_SGN-U317098	-0.00377886	SGN-U221528_SGN-U324319	-0.0607809	SGN-U212578_SGN-U312516	-0.167583	SGN-U217308_SGN-U319472	0.0475334	SGN-U226030_SGN-U328613	0.160821	SGN-U220855_SGN-U322139	0.0204524	SGN-U217933_SGN-U320026	0.0691994	SGN-U226136_SGN-U329137	-0.141161	SGN-U217233_SGN-U319033	-0.0645934	SGN-U220234_SGN-U322305	-0.00434699	SGN-U225967_SGN-U317721	0.016708	SGN-U240026_SGN-U340284	-0.0221797	SGN-U219727_SGN-U321375	0.0186456	SGN-U220500_SGN-U322937	-0.0304422	SGN-U219559_SGN-U321244	0.131885	SGN-U217711_SGN-U318001	0.353703	SGN-U218174_SGN-U320629	-0.109445	SGN-U221790_SGN-U323609	-0.0209821	SGN-U216421_SGN-U316947	-0.00843933
iimethylbutanal	SGN-U214534_SGN-U312350	0.0475396	SGN-U218212_SGN-U318328	0.15598	SGN-U218886_SGN-U319870	-0.0125392	SGN-U222551_SGN-U324856	-0.0414214	SGN-U225275_SGN-U321505	0.0489177	SGN-U217380_SGN-U319436	-0.0570339	SGN-U213982_SGN-U313967	0.0815385	SGN-U224348_SGN-U326468	0.0229331	SGN-U217548	-0.247653	AJ224356_AJ224356	0.0295042	SGN-U221661_SGN-U323715	0.0139538	SGN-U213704_SGN-U313542	-0.151485	SGN-U219503_SGN-U314174	-0.0354933	SGN-U216689_SGN-U317869	0.0312921	SGN-U214063_SGN-U313856	-0.0604423	SGN-U226566_SGN-U323602	0.0446846	SGN-U216385_SGN-U316114	0.0254286	SGN-U213149_SGN-U312900	-0.115183	U37840_U37840	0.253124	SGN-U217047_SGN-U318915	0.0238528
ipenten3ol	SGN-U215151_SGN-U315909	0.0401052	SGN-U227476_SGN-U328055	-0.273301	SGN-U215564_SGN-U317187	0.0205607	SGN-U217664_SGN-U319093	0.0463928	SGN-U217942_SGN-U316222	-0.100283	SGN-U216535_SGN-U317875	-0.00828253	SGN-U215342_SGN-U315207	-0.144237	SGN-U213839_SGN-U314112	-0.0504794	SGN-U222265	-0.0120622	SGN-U231178_SGN-U326533	0.0562639	SGN-U222850_SGN-U319641	0.0548124	SGN-U213383_SGN-U314859	0.0969613	SGN-U221920	0.139134	SGN-U213645_SGN-U312523	0.0576703	SGN-U213616_SGN-U334029	-0.00571523	SGN-U214309_SGN-U315098	0.319525	SGN-U215591_SGN-U316627	0.0311482	SGN-U220753	0.036283	SGN-U218445	-0.00678268
ipenten3one	SGN-U222941_SGN-U325709	-0.0246365	SGN-U222121	-0.0122147	SGN-U214388_SGN-U312444	0.146915	SGN-U240896_SGN-U332289	0.161514	SGN-U215560_SGN-U316780	-0.277977	SGN-U225319_SGN-U325096	0.00418017	SGN-U219942_SGN-U321581	0.0416512	SGN-U232990_SGN-U335271	-0.0947471	SGN-U213341_SGN-U312911	-0.113861	SGN-U216118	-0.145047	SGN-U224412_SGN-U326863	0.00835603	SGN-U227230_SGN-U328820	-0.163516	SGN-U228571_SGN-U324173	-0.0815818	SGN-U228429_SGN-U313110	0.0418191	SGN-U220811_SGN-U322007	0.181983
Pentanal	SGN-U212736_SGN-U314384	-0.0071678	SGN-U216880_SGN-U318917	-0.213712	SGN-U224187_SGN-U327450	0.0711571	SGN-U212914_SGN-U314405	0.0224604	SGN-U235796_SGN-U330845	-0.119957	SGN-U217031_SGN-U318343	-0.184305	SGN-U214077_SGN-U314048	0.0741143	SGN-U216194_SGN-U316591	0.204936	SGN-U213616_SGN-U334029	-0.348534	SGN-U213630_SGN-U313697	0.105189	SGN-U215277_SGN-U315318	0.096775	SGN-U218174_SGN-U320629	-0.000298389	SGN-U218776_SGN-U318980	-0.0513936
iiethylfuran	SGN-U216997_SGN-U317447	-0.0312652	SGN-U217252_SGN-U317822	-0.0244081	SGN-U223036	0.0880468	SGN-U213833_SGN-U313496	-0.186658	SGN-U217002_SGN-U318146	-0.0722007	SGN-U214473_SGN-U314515	0.062184	SGN-U215410_SGN-U316087	-0.00680204	SGN-U228776_SGN-U327674	-0.180631	SGN-U221075_SGN-U322753	0.0169905	SGN-U224469_SGN-U318850	0.0200386	AJ002281_AJ002281	0.00753288	SGN-U235796_SGN-U330845	0.0531754	SGN-U216470	0.075457	SGN-U214077_SGN-U314048	-0.133038	SGN-U215681_SGN-U316194	0.118645	SGN-U222469_SGN-U325426	-0.0902497	SGN-U215556_SGN-U316524	0.305429	SGN-U217898	0.0272484
iiimethylbutanenitrile	SGN-U220722_SGN-U322998	-0.0416382	SGN-U217574_SGN-U315065	0.061604	SGN-U212594_SGN-U312405	0.00990919	SGN-U224378_SGN-U323111	-0.00282623	SGN-U213923_SGN-U313182	-0.1386	SGN-U215575_SGN-U316743	0.0101114	SGN-U219114_SGN-U320806	-0.112427	SGN-U217454_SGN-U319191	-0.0792552	SGN-U215144_SGN-U315615	0.0197727	SGN-U226313_SGN-U327656	0.0302324	SGN-U220875_SGN-U322899	-0.0211177	SGN-U226069_SGN-U324984	0.131679	SGN-U214610_SGN-U315818	-0.241945	SGN-U216215_SGN-U317475	0.0461105	SGN-U216002_SGN-U317646	0.0849566	SGN-U213637_SGN-U313879	-0.129126	SGN-U219785_SGN-U334944	-0.0173385	SGN-U215965_SGN-U314712	0.321351
iiimethylbutanol	SGN-U220722_SGN-U322998	-0.090825	SGN-U213923_SGN-U313182	-0.0424794	SGN-U221669_SGN-U323705	-0.159558	SGN-U219337_SGN-U318382	0.0638422	SGN-U219914_SGN-U322500	0.0366193	SGN-U215575_SGN-U316743	0.045167	SGN-U219114_SGN-U320806	-0.0676875	SGN-U215144_SGN-U315615	0.086108	SGN-U218068_SGN-U318660	-0.0322727	SGN-U218589_SGN-U320090	-0.207248	SGN-U214610_SGN-U315818	-0.232211	SGN-U216215_SGN-U317475	0.0975884	SGN-U223726_SGN-U327018	0.0951142	SGN-U213637_SGN-U313879	-0.0266518	SGN-U215965_SGN-U314712	0.216628
iimethyl1butanol	SGN-U220031_SGN-U320333	0.0994877	SGN-U220861	0.143987	SGN-U217685_SGN-U319691	-0.0198588	SGN-U222249_SGN-U322343	-0.123204	SGN-U217548	-0.0714838	SGN-U214151_SGN-U313712	-0.0156709	SGN-U220743_SGN-U322110	-0.130272	SGN-U215593_SGN-U316746	0.0217361	SGN-U228202_SGN-U332427	-0.0193614	SGN-U213680_SGN-U313784	-0.0578054	SGN-U217682	-0.0264085	SGN-U228025	0.0920771	SGN-U213967_SGN-U314214	-0.172973	SGN-U213149_SGN-U312900	-0.22862	SGN-U215815_SGN-U317244	-0.066562	SGN-U215965_SGN-U314712	0.0850966	SGN-U233298	0.0176843	SGN-U214621_SGN-U314143	0.107711
E_2methyl2butenal	SGN-U224532_SGN-U321020	0.131805	SGN-U216342_SGN-U316334	-0.00367374	SGN-U216265_SGN-U317604	0.0538684	SGN-U216659_SGN-U318017	0.0401514	SGN-U214098_SGN-U315137	0.0328315	SGN-U227526_SGN-U315177	0.0513421	SGN-U216269_SGN-U316821	-0.107593	SGN-U215168_SGN-U316497	0.0169397	SGN-U231632_SGN-U319978	0.0774092	SGN-U223813_SGN-U327259	0.0739197	SGN-U213616_SGN-U334029	-0.0122817	SGN-U236778_SGN-U346096	-0.0688346	SGN-U226400_SGN-U326045	0.220075	SGN-U239979_SGN-U319317	0.0155831	SGN-U217711_SGN-U318001	0.222009	SGN-U212875_SGN-U312591	0.00689715	SGN-U220355	-0.204832	SGN-U217204_SGN-U319028	-0.151191	SGN-U221357	-0.00876236
E_2pentenal	SGN-U213862_SGN-U314778	0.243331	SGN-U231495	0.0182584	SGN-U224284_SGN-U320195	0.0519106	SGN-U218631	0.0924793	SGN-U215342_SGN-U315207	-0.118847	SGN-U219942_SGN-U321581	0.0443308	SGN-U214092_SGN-U312775	0.0725736	SGN-U218097_SGN-U320227	-0.102011	SGN-U240216_SGN-U324293	-0.306634	SGN-U213674_SGN-U313515	-0.123966	SGN-U212604	-0.0124165	SGN-U227860_SGN-U329062	0.0782334	SGN-U222469_SGN-U325426	-0.0100279	SGN-U226675	0.14895	SGN-U214304_SGN-U314129	-0.060588	SGN-U222820_SGN-U325512	0.0067664	SGN-U216826_SGN-U317391	-0.00867683
ipentanol	SGN-U221638_SGN-U322334	0.0110793	SGN-U214750_SGN-U315883	-0.0523259	SGN-U231937_SGN-U323558	-0.0413579	SGN-U215188_SGN-U314607	0.0093278	SGN-U225558_SGN-U328424	-0.0258234	SGN-U217276_SGN-U319117	-0.054995	SGN-U217640_SGN-U315914	0.143229	SGN-U236260_SGN-U333305	-0.161273	SGN-U222747	0.0357726	Y12640	0.256352	SGN-U213616_SGN-U334029	-0.232144	SGN-U213630_SGN-U313697	0.00304888	SGN-U214309_SGN-U315098	0.451974	SGN-U221990_SGN-U325547	-0.0212977
Z_3hexenal	SGN-U231146	-0.107792	SGN-U219470_SGN-U321779	0.193576	SGN-U221524_SGN-U321577	-0.00679979	SGN-U216648_SGN-U316774	0.0661289	SGN-U228776_SGN-U327674	-0.122711	SGN-U215788_SGN-U320013	0.0471582	SGN-U220224_SGN-U318668	-0.0653377	SGN-U221075_SGN-U322753	0.0111818	SGN-U221127_SGN-U323375	0.172716	SGN-U222097_SGN-U324058	0.0839364	SGN-U235796_SGN-U330845	0.0284677	SGN-U219086_SGN-U320479	0.0323982	SGN-U221107	0.119388	SGN-U213967_SGN-U314214	-0.155631	SGN-U215556_SGN-U316524	0.284274	SGN-U213679_SGN-U313787	0.00250343
Hexanal	SGN-U223036	0.0154032	SGN-U236488_SGN-U316115	-0.277142	SGN-U218381_SGN-U320564	0.0435273	SGN-U213496_SGN-U313630	-0.070252	SGN-U214991_SGN-U315631	-0.0953199	SGN-U226997_SGN-U325499	-0.0249867	SGN-U216016_SGN-U316699	-0.0106706	SGN-U216444_SGN-U318416	0.0499355	SGN-U218485_SGN-U321178	-0.12811	SGN-U219528_SGN-U322486	-0.151938	SGN-U227429	-0.0883998	SGN-U217418_SGN-U313365	-0.0776729	SGN-U216928	-0.14183	SGN-U225885	0.130493	SGN-U218747_SGN-U320141	-0.00835324	SGN-U222820_SGN-U325512	0.136779	SGN-U213827_SGN-U313661	-0.0491869
iiimethylbutanoic_acid	SGN-U220722_SGN-U322998	-0.241026	SGN-U224563_SGN-U326082	-0.0147628	SGN-U220297_SGN-U320219	0.366009	SGN-U216771_SGN-U318764	-0.0434369	SGN-U217122_SGN-U318455	-0.0154288	SGN-U218888_SGN-U320999	-0.0956329	SGN-U214377_SGN-U314989	0.0711849	SGN-U217869	-0.0203694	SGN-U219846_SGN-U321537	-0.0308807	SGN-U227393_SGN-U330088	0.0521497	SGN-U233482_SGN-U336256	0.0310872	SGN-U216333_SGN-U317255	0.1114	SGN-U219992	-0.0315024	SGN-U214072_SGN-U314996	-0.0454799	SGN-U216862_SGN-U318140	0.165016	SGN-U213231_SGN-U312949	0.0383106	SGN-U221188_SGN-U319910	-0.0654306	SGN-U213827_SGN-U313661	0.0608924
E_2hexenal	SGN-U218204_SGN-U318406	0.154691	SGN-U221966_SGN-U320665	0.0126947	SGN-U223396	0.0746538	SGN-U225517_SGN-U314688	0.0300465	SGN-U217907_SGN-U318352	0.0871235	SGN-U228776_SGN-U327674	-0.216316	SGN-U215996_SGN-U317500	-0.269318	SGN-U223903_SGN-U321075	0.0513121	SGN-U213607_SGN-U313757	0.0917274	SGN-U213178	-0.121355	SGN-U219297_SGN-U320248	0.0836554	SGN-U219231_SGN-U313920	0.12276	X59948_X59948	-0.0231101	SGN-U215749_SGN-U315237	0.0118506	SGN-U215556_SGN-U316524	0.149386
Z_3hexen1ol	SGN-U219643_SGN-U315780	0.0990529	SGN-U223443	-0.0868485	SGN-U217672_SGN-U319361	0.131067	SGN-U221157	0.16112	SGN-U215695_SGN-U316851	-0.0786846	SGN-U227342_SGN-U320398	0.0427016	SGN-U219194_SGN-U321010	-0.101248	SGN-U214065_SGN-U315028	0.0816028	SGN-U217308_SGN-U319472	0.105385	SGN-U227156_SGN-U324894	0.00163869	SGN-U215619_SGN-U316325	-0.159986	SGN-U227239	-0.125447	SGN-U231471	0.0200041	SGN-U227152	-0.00217917	SGN-U216034_SGN-U316806	-0.053983	SGN-U222740_SGN-U323711	-0.0121823	SGN-U219271	-0.0432523	SGN-U224880_SGN-U322927	-0.0750933	SGN-U214336_SGN-U315026	0.118523
Pentanoic_acid	SGN-U224486_SGN-U318110	0.125393	SGN-U240820_SGN-U340052	0.0471302	SGN-U214846_SGN-U315955	-0.0808275	SGN-U223571_SGN-U325508	0.0541436	SGN-U217976_SGN-U320379	-0.0785458	SGN-U214431_SGN-U314195	0.00449373	SGN-U213335_SGN-U312840	-0.0654785	SGN-U217308_SGN-U319472	0.238954	SGN-U215402_SGN-U316507	0.0171984	SGN-U217777_SGN-U319153	-0.201783	SGN-U214088_SGN-U313986	0.0397708	SGN-U218348_SGN-U319846	0.101961	SGN-U221379_SGN-U324439	-0.0401151	SGN-U214591_SGN-U315695	0.0198742	SGN-U217611_SGN-U318766	0.0384717	SGN-U233805_SGN-U335883	-0.00576396	SGN-U217185	-0.0174898	SGN-U228797_SGN-U331609	0.125325	SGN-U223279	-0.19728
EE_24hexadien1al	SGN-U223767_SGN-U327094	-0.00547604	SGN-U219270_SGN-U320992	0.0380938	SGN-U220206_SGN-U322797	0.152278	SGN-U221502_SGN-U320289	-0.0160523	SGN-U219470_SGN-U321779	0.267553	SGN-U214005_SGN-U313833	-0.11746	SGN-U220224_SGN-U318668	-0.122227	SGN-U221075_SGN-U322753	0.109106	SGN-U235796_SGN-U330845	0.0314283	SGN-U216279_SGN-U317840	-0.092465	SGN-U212790_SGN-U314922	-0.130145	SGN-U236654	0.031261	SGN-U213967_SGN-U314214	-0.0803475	SGN-U227396_SGN-U328461	0.101334	SGN-U215556_SGN-U316524	0.204773
apinene	SGN-U213158_SGN-U312863	0.212862	SGN-U214431_SGN-U314195	0.251217	SGN-U213536_SGN-U313302	-0.0448568	SGN-U216984	-0.028459	SGN-U225757	0.137779	SGN-U214608_SGN-U315368	-0.0259949	SGN-U222651_SGN-U317997	0.0398335	SGN-U214499_SGN-U315570	0.0671115	SGN-U230512_SGN-U331682	-0.0362518	SGN-U214951	0.190945	SGN-U221533_SGN-U314544	0.027742	SGN-U216371_SGN-U317953	0.0463154	SGN-U225214_SGN-U328828	0.0287854	SGN-U217912_SGN-U317514	-0.0490049	SGN-U214257_SGN-U315070	-0.0269108	SGN-U216037_SGN-U316646	0.0459982	SGN-U217789_SGN-U317783	0.101219	SGN-U223279	-0.0869159	SGN-U213892_SGN-U313448	0.051799
Hexanoic_acid	SGN-U223036	0.153679	SGN-U215171_SGN-U315305	0.0581044	SGN-U218774_SGN-U318627	-0.000379299	SGN-U213338_SGN-U313384	-0.136903	SGN-U216708_SGN-U312884	-0.0185745	SGN-U219408	0.0134008	SGN-U214406_SGN-U315138	0.0339462	SGN-U215001_SGN-U313803	-0.193056	Y12640	0.209382	SGN-U214484_SGN-U313651	0.0552654	SGN-U213159_SGN-U313051	0.0597006	SGN-U217557_SGN-U318086	0.00470846	SGN-U213199_SGN-U312991	0.00534588	SGN-U220404	0.111688	SGN-U218446_SGN-U320737	0.0850152	SGN-U215277_SGN-U315318	0.123181	SGN-U213210_SGN-U312565	-0.0164493	SGN-U213834_SGN-U313711	0.221127
E_2heptenal	SGN-U221638_SGN-U322334	0.132989	SGN-U218673_SGN-U319429	-0.0195993	SGN-U213089	0.0613588	SGN-U219217	-0.135463	SGN-U220780_SGN-U321611	0.0123284	SGN-U214537_SGN-U314378	-0.0829407	SGN-U216789	0.060234	SGN-U217758_SGN-U318645	-0.00656779	BT014484_BT014484	0.00502965	SGN-U232626_SGN-U334439	-0.0403648	SGN-U213203_SGN-U312642	-0.00445673	SGN-U213616_SGN-U334029	-0.290195	SGN-U227032_SGN-U328378	0.171418	SGN-U213630_SGN-U313697	0.184777	SGN-U215256_SGN-U319925	-0.109137	SGN-U217872_SGN-U317686	-0.0110265	SGN-U213002_SGN-U312551	-0.0864439	SGN-U221990_SGN-U325547	-0.0856711
Benzaldehyde	SGN-U232813	0.168951	SGN-U221750_SGN-U320809	-0.0540233	SGN-U225669	-0.0712727	SGN-U216923_SGN-U317275	-0.100909	SGN-U240992	-0.181691	SGN-U221824_SGN-U312511	-0.239059	SGN-U220161_SGN-U315842	0.0629038	SGN-U231032	0.000941236	SGN-U221667_SGN-U319408	0.219644	SGN-U218715	-0.0438575	SGN-U219482_SGN-U322409	-0.0305632	SGN-U213674_SGN-U313515	-0.0880151	SGN-U223818_SGN-U324316	0.120433	SGN-U219845_SGN-U322008	0.0531509	SGN-U221789_SGN-U321481	0.00927034	SGN-U214858_SGN-U315735	0.021188	SGN-U213293_SGN-U312445	0.0341271
6methyl5hepten2one	SGN-U223719_SGN-U321747	0.0466548	SGN-U216505_SGN-U316323	-0.12317	SGN-U213982_SGN-U313967	0.0277879	SGN-U216664_SGN-U317046	0.11258	SGN-U214288_SGN-U314161	0.0866375	SGN-U219368	0.0903206	SGN-U217203_SGN-U318993	0.105024	SGN-U233482_SGN-U336256	-0.00143133	SGN-U212615	0.0947571	SGN-U219997_SGN-U321259	0.11371	SGN-U218017_SGN-U320259	-0.00540533	SGN-U216025_SGN-U317773	0.0197873	SGN-U217805_SGN-U319677	-0.237224	SGN-U221858_SGN-U322977	-0.0746775	SGN-U214286_SGN-U314862	-0.0623452	SGN-U212715_SGN-U312391	0.114162	SGN-U214495_SGN-U314197	0.00553558	SGN-U218586_SGN-U320546	0.178789
iipentylfuran	SGN-U213788_SGN-U313933	-0.0486835	SGN-U222842_SGN-U323153	0.00142457	SGN-U220612_SGN-U320695	-0.0379578	SGN-U216505_SGN-U316323	-0.0347602	SGN-U213536_SGN-U313302	-0.0755179	SGN-U218052_SGN-U319380	0.0934489	SGN-U218716_SGN-U320159	0.0611447	SGN-U217379_SGN-U319437	-0.192378	SGN-U212614_SGN-U314473	0.194528	SGN-U222011_SGN-U325001	-0.190208	SGN-U213054	0.00477671	SGN-U227335_SGN-U325837	-0.0572358	Y12640	0.139426	SGN-U226518	0.0354993	SGN-U213616_SGN-U334029	-0.222708	SGN-U218956_SGN-U321242	0.0342344	SGN-U215256_SGN-U319925	-0.0545922	SGN-U222145_SGN-U322875	-0.0214755
Octanal	SGN-U222007_SGN-U314817	-0.0103211	SGN-U220195_SGN-U317163	0.116554	SGN-U214153_SGN-U314040	0.116058	SGN-U214431_SGN-U314195	0.30338	SGN-U225669	-0.0548533	SGN-U217471_SGN-U318405	0.0498671	SGN-U227718_SGN-U327266	-0.00823743	SGN-U216022_SGN-U317071	-0.078777	SGN-U242803	0.0110195	SGN-U221667_SGN-U319408	0.136275	SGN-U219997_SGN-U321259	0.0840586	SGN-U222651_SGN-U317997	0.407396	SGN-U221858_SGN-U322977	-0.0181546	BT014484_BT014484	0.0310349	L08830_L08830	0.00823307	SGN-U214230_SGN-U315089	-0.0348088	SGN-U223279	-0.030972
Benzylacohol	SGN-U213522	-0.0867163	SGN-U219438_SGN-U317197	-0.148297	SGN-U221750_SGN-U320809	-0.0325618	SGN-U212765	-0.00478121	SGN-U214589_SGN-U314265	-0.135183	SGN-U225060_SGN-U326690	-0.0877402	SGN-U216076_SGN-U317094	0.0161272	SGN-U217548	-0.181545	SGN-U219181_SGN-U321640	-0.0444339	SGN-U229808_SGN-U332421	0.188664	SGN-U220526_SGN-U322449	0.0407263	SGN-U215765_SGN-U315478	0.00611045	SGN-U217938_SGN-U319799	0.0953831	SGN-U226795_SGN-U328962	0.0771179	SGN-U213807_SGN-U313513	-0.0237141	SGN-U228493	-0.175346	SGN-U219162_SGN-U321292	-0.0600422	SGN-U222939_SGN-U323815	0.0121988	SGN-U221219_SGN-U324176	0.0833123
iiisobutylthiazol	SGN-U226447_SGN-U324732	-0.0185695	SGN-U217517_SGN-U317450	-0.260475	SGN-U214705_SGN-U313729	0.0101829	SGN-U219444_SGN-U320487	0.0583681	SGN-U220492_SGN-U317660	0.101553	SGN-U225925_SGN-U326109	-0.087843	SGN-U221257	-0.0300764	SGN-U225154	-0.138721	SGN-U218553_SGN-U320030	-0.0585867	SGN-U217321_SGN-U318156	0.0257686	SGN-U223851_SGN-U323861	0.0369339	SGN-U217812_SGN-U319331	-0.148023	SGN-U230300_SGN-U332517	-0.0374982	SGN-U216520_SGN-U317324	-0.090767	SGN-U217992_SGN-U318165	0.00534453	SGN-U217912_SGN-U317514	-0.10625	SGN-U229915_SGN-U327869	-0.00832565	SGN-U215940_SGN-U317892	-0.217718	SGN-U221716_SGN-U323916	0.0589962
Phenylacetaldehyde	SGN-U242333_SGN-U320592	-0.0308491	SGN-U220207_SGN-U322034	-0.0278459	SGN-U227600_SGN-U324139	-0.181645	SGN-U219733_SGN-U321937	0.0243309	SGN-U220257	-0.201148	U77719_U77719	-0.0128822	SGN-U217151_SGN-U318180	-0.152122	SGN-U214848_SGN-U315951	0.0758665	SGN-U226193_SGN-U326775	-0.0256732	SGN-U213946_SGN-U314345	-0.182554	SGN-U214924_SGN-U315480	0.0245884	SGN-U216300_SGN-U317365	-0.165841	SGN-U240835	-0.0766986	SGN-U239556_SGN-U342488	0.0528056	SGN-U221789_SGN-U321481	0.0663488	SGN-U225768_SGN-U327993	-0.000405996	SGN-U215366	-0.0778936	SGN-U217898	-0.120501
E_2Octenal	SGN-U215776_SGN-U313723	0.0397597	SGN-U217664_SGN-U319093	0.048413	SGN-U214169_SGN-U314089	0.0621683	SGN-U231088_SGN-U322168	-0.0460445	SGN-U231146	0.107542	SGN-U219217	-0.0259605	SGN-U221973_SGN-U321727	0.00287722	SGN-U217129_SGN-U317152	-0.056	SGN-U212893_SGN-U312672	0.00583893	SGN-U212614_SGN-U314473	0.00341596	SGN-U225520_SGN-U314245	-0.148384	SGN-U218335_SGN-U318769	0.0266163	SGN-U217137_SGN-U318035	-0.0435781	SGN-U218016_SGN-U318912	0.0601971	SGN-U218600_SGN-U320076	-0.027302	SGN-U221459_SGN-U321667	-0.0254968	SGN-U231357_SGN-U330446	0.00713384	SGN-U220043_SGN-U318264	0.0757955	SGN-U213616_SGN-U334029	-0.198938	SGN-U215256_SGN-U319925	-0.0947762	SGN-U215366	0.0362483	SGN-U223279	-0.357514
Acetophenone	SGN-U219643_SGN-U315780	0.0347739	SGN-U221636_SGN-U319193	0.0146516	SGN-U216423_SGN-U317605	-0.0551896	SGN-U217455_SGN-U318873	-0.0431509	SGN-U216022_SGN-U317071	-0.0292933	SGN-U221376_SGN-U323986	0.157823	SGN-U212893_SGN-U312672	0.141743	SGN-U217195_SGN-U318544	-0.0109647	SGN-U221667_SGN-U319408	0.031355	SGN-U222651_SGN-U317997	0.00689776	SGN-U227123_SGN-U328657	-0.0106276	SGN-U221686_SGN-U323348	-0.134802	SGN-U225360_SGN-U324043	-0.0675948	SGN-U214591_SGN-U315695	0.106073	SGN-U221858_SGN-U322977	-0.00259286	SGN-U217814_SGN-U319035	0.0726546	SGN-U220562_SGN-U321192	-0.0446238	SGN-U223818_SGN-U324316	0.115004	SGN-U220262_SGN-U321392	-0.0307485	SGN-U227236_SGN-U329521	0.0492321	SGN-U228797_SGN-U331609	0.107225	SGN-U215715_SGN-U314444	0.0025546	SGN-U217898	-0.0634273	SGN-U236496_SGN-U346814	0.166997
iiethylhexanoic_acid	SGN-U216717_SGN-U318101	0.104972	SGN-U222023_SGN-U324522	-0.0316638	SGN-U214043_SGN-U314010	-0.0525802	SGN-U217869	0.0384854	SGN-U227809_SGN-U329258	-0.0468079	SGN-U220691_SGN-U322694	0.0214594	SGN-U221297_SGN-U322951	0.171581	SGN-U226873_SGN-U324520	-0.016001	SGN-U219849_SGN-U322245	0.0618109	SGN-U228493	-0.125463	SGN-U215369_SGN-U313839	-0.216539	SGN-U219005_SGN-U321102	0.183579	SGN-U214182_SGN-U315079	-0.0833599	SGN-U224088_SGN-U337714	-0.105789	SGN-U217056_SGN-U319304	-0.0870897	SGN-U227495_SGN-U323493	-0.152819
Guaiacol	SGN-U222430_SGN-U323659	-0.0934195	SGN-U213918_SGN-U313852	-0.0307951	SGN-U226505	0.0183697	SGN-U217982_SGN-U319433	-0.0487449	SGN-U223136_SGN-U318495	-0.0566572	SGN-U215259_SGN-U315166	-0.0634075	SGN-U224152	-0.0293815	SGN-U232645_SGN-U334677	-0.163311	SGN-U218348_SGN-U319846	-0.0204614	SGN-U215759_SGN-U317563	-0.215612	SGN-U213626_SGN-U315422	-0.109236	SGN-U219049_SGN-U320773	-0.0950955	SGN-U221107	-0.229345	SGN-U233328_SGN-U335909	0.201178	SGN-U221792_SGN-U322052	0.113384	SGN-U228047	-0.0116022
ptolualdehyde	SGN-U215657_SGN-U316876	0.0718739	SGN-U213865_SGN-U313951	0.0158679	SGN-U219549_SGN-U320255	0.0228367	SGN-U217455_SGN-U318873	-0.0345486	SGN-U219733_SGN-U321937	0.0275388	SGN-U219500_SGN-U319943	-0.156245	SGN-U223128_SGN-U318255	0.00723389	SGN-U212739	0.104254	SGN-U223726_SGN-U327018	-0.256996	SGN-U218860_SGN-U320278	-0.131825	SGN-U225944_SGN-U327673	0.162251	SGN-U219847_SGN-U320711	-0.0602477	SGN-U215998	0.140546	SGN-U217390_SGN-U318604	-0.0334043	SGN-U216210_SGN-U317218	-0.0229093	SGN-U218198_SGN-U319638	0.0448933	SGN-U213393_SGN-U313462	-0.206529
Linalool	SGN-U226303_SGN-U318556	0.0206387	SGN-U212654_SGN-U312630	-0.0341429	SGN-U217068	-0.0705386	SGN-U226166_SGN-U330048	-0.0486718	SGN-U214848_SGN-U315951	0.0519136	SGN-U217799_SGN-U317802	-0.270655	SGN-U213146_SGN-U312920	0.0213433	SGN-U214902_SGN-U316224	0.150942	SGN-U225742_SGN-U321464	0.210156	SGN-U222649_SGN-U321363	-0.199006	SGN-U214182_SGN-U315079	0.0461161	SGN-U213802_SGN-U313824	-0.044138	SGN-U214919_SGN-U315203	-0.317979	SGN-U215086_SGN-U315913	0.013759
Nonanal	SGN-U218204_SGN-U318406	-0.106231	SGN-U214431_SGN-U314195	0.305343	SGN-U225669	-0.00574563	SGN-U216022_SGN-U317071	-0.140573	SGN-U220979_SGN-U326114	0.0042208	SGN-U221261_SGN-U323448	0.0414534	SGN-U242803	0.00717913	SGN-U221667_SGN-U319408	0.192132	SGN-U222651_SGN-U317997	0.265092	SGN-U212979_SGN-U313113	0.039063	SGN-U221533_SGN-U314544	0.16375	SGN-U223726_SGN-U327018	-0.0190187	SGN-U215219_SGN-U316022	0.0207635	SGN-U218761_SGN-U320143	-0.0572325	SGN-U214230_SGN-U315089	-0.0819277	SGN-U216210_SGN-U317218	-0.0502743
iiphenylethanol	SGN-U223571_SGN-U325508	0.153119	SGN-U219740_SGN-U321742	-0.105715	SGN-U221824_SGN-U312511	-0.155353	SGN-U213443_SGN-U312856	0.133617	SGN-U218033_SGN-U319640	-0.0149957	SGN-U215545_SGN-U315800	-0.0211537	SGN-U229617_SGN-U332420	0.0169185	SGN-U217799_SGN-U317802	-0.114171	SGN-U218015_SGN-U320137	-0.0608361	SGN-U218470	0.00258146	SGN-U226400_SGN-U326045	0.195314	SGN-U213919_SGN-U313850	-0.137244	SGN-U214858_SGN-U315735	0.0140027	SGN-U213009_SGN-U312492	-0.0772629	SGN-U213002_SGN-U312551	0.0901378	SGN-U221889	0.0317353	SGN-U214621_SGN-U314143	0.0372635	SGN-U217898	-0.13858
Octanoic_acid	SGN-U218839_SGN-U318636	0.00458663	SGN-U216446_SGN-U318335	-0.109995	SGN-U213972_SGN-U313053	-0.113666	SGN-U218429_SGN-U318402	-0.0348369	SGN-U222991_SGN-U321576	0.0909406	SGN-U223160_SGN-U325676	-0.0590585	SGN-U213323_SGN-U313209	-0.0175586	SGN-U217359_SGN-U318467	-0.156416	SGN-U215773_SGN-U317136	-0.0157843	SGN-U231357_SGN-U330446	0.0381984	SGN-U232626_SGN-U334439	-0.265805	SGN-U217557_SGN-U318086	0.0277139	SGN-U215233_SGN-U316826	0.070314	SGN-U214355_SGN-U313813	-0.0380634	SGN-U215256_SGN-U319925	-0.132595	SGN-U214309_SGN-U315098	0.139466	SGN-U231712_SGN-U324169	-0.0708967	SGN-U214929_SGN-U315889	0.114105
Benzylnitrile	SGN-U221898_SGN-U321887	-0.00227575	SGN-U218432_SGN-U317996	0.0291461	SGN-U214600_SGN-U315162	0.0549262	SGN-U216373_SGN-U317366	-0.00801223	SGN-U214705_SGN-U313729	0.0680384	SGN-U223109_SGN-U325454	-0.0112502	SGN-U233513_SGN-U335607	0.0987564	SGN-U219663_SGN-U321140	-0.0277243	SGN-U214741_SGN-U316086	0.00291373	SGN-U224099_SGN-U325478	0.229424	SGN-U217947_SGN-U318897	0.168666	SGN-U212911_SGN-U312399	0.0563082	SGN-U216214_SGN-U317056	0.0382208	SGN-U231178_SGN-U326533	0.00951156	SGN-U230826_SGN-U333021	0.085815	SGN-U221381_SGN-U323787	-0.23873	SGN-U214951	0.0520376	SGN-U216118	-0.0754554	SGN-U213946_SGN-U314345	-0.0349187	SGN-U223171_SGN-U324243	0.00468809	SGN-U217760_SGN-U316504	0.0291484	AF500012_AF500012	-0.00380483	SGN-U215674_SGN-U316790	0.00478991	SGN-U225768_SGN-U327993	-0.165439
Decanal	SGN-U222007_SGN-U314817	-0.171079	SGN-U221094_SGN-U324094	-0.0895983	SGN-U218236_SGN-U318673	-0.039784	SGN-U223606_SGN-U323768	-0.195459	SGN-U221423_SGN-U323323	0.021629	SGN-U213238_SGN-U312999	-0.0123388	SGN-U226473_SGN-U325595	0.27903	SGN-U226032_SGN-U325896	0.0431808	SGN-U216380_SGN-U318149	-0.0168374	SGN-U214689_SGN-U315394	-0.0405671	SGN-U215090_SGN-U316052	-0.0684038	SGN-U218680_SGN-U319832	-0.0169928	SGN-U218586_SGN-U320546	0.101329	SGN-U212885	0.11577	SGN-U213679_SGN-U313787	-0.0922983	SGN-U216210_SGN-U317218	-0.195702
Terpineol	SGN-U220825_SGN-U320517	0.0426462	SGN-U215309_SGN-U313859	0.032865	SGN-U213705_SGN-U313543	-0.243997	SGN-U215649_SGN-U317307	0.0972093	SGN-U216995_SGN-U317444	-0.0773024	SGN-U216038_SGN-U316645	-0.159163	SGN-U216356_SGN-U312749	0.0644201	SGN-U215581	0.126845	SGN-U215228_SGN-U315808	0.137114	SGN-U217859_SGN-U318629	-0.00425374	SGN-U215468_SGN-U315351	-0.0307533	SGN-U215180_SGN-U315008	-0.14036	SGN-U219086_SGN-U320479	-0.0857572	SGN-U214919_SGN-U315203	-0.224021	SGN-U216355_SGN-U317923	-0.0332925
Methylsalicylate	SGN-U215827_SGN-U317113	0.122277	SGN-U218089_SGN-U319146	-0.0155125	SGN-U219358	0.0905382	SGN-U213088_SGN-U312830	-0.207377	SGN-U213089	-0.162788	SGN-U221265_SGN-U322609	-0.0971686	SGN-U228980	-0.0608419	SGN-U214719_SGN-U316033	-0.111098	SGN-U214905	-0.0381178	SGN-U217982_SGN-U319433	-0.0392921	SGN-U216269_SGN-U316821	0.0273898	SGN-U220810_SGN-U322671	-0.101052	SGN-U232645_SGN-U334677	-0.0445478	SGN-U226069_SGN-U324984	0.0545271	SGN-U213626_SGN-U315422	-0.123666	SGN-U219263	0.0943473	SGN-U221990_SGN-U325547	0.10946
Geranial	SGN-U218089_SGN-U319146	0.0140726	SGN-U216505_SGN-U316323	-0.251075	SGN-U216664_SGN-U317046	0.0845699	SGN-U216712	-0.179445	SGN-U219364	0.181249	SGN-U219689_SGN-U322476	0.128672	SGN-U221133_SGN-U324271	0.0663929	SGN-U229627	0.0325747	SGN-U226937_SGN-U326325	-0.068709	SGN-U226579_SGN-U314085	-0.024541	SGN-U229622_SGN-U322407	0.0557211	SGN-U215915_SGN-U317370	0.210126	SGN-U216609_SGN-U316772	-0.118467	SGN-U212922_SGN-U314797	0.0843868
Ethylsalicylate	SGN-U221683_SGN-U324373	0.00566969	SGN-U220394_SGN-U321639	0.0438845	SGN-U221070	-0.0582544	SGN-U216716_SGN-U314771	0.139762	SGN-U225558_SGN-U328424	0.150036	SGN-U216531_SGN-U318717	0.110929	SGN-U227530_SGN-U329316	-0.0906633	SGN-U227526_SGN-U315177	-0.0877833	SGN-U224525	0.15695	SGN-U224209_SGN-U323470	-0.107355	SGN-U218419_SGN-U320637	-0.0974968	SGN-U219428_SGN-U321098	0.102961	L23424	0.00376734	SGN-U229614	-0.00631826	SGN-U214309_SGN-U315098	-0.23095	SGN-U218761_SGN-U320143	0.0122687	SGN-U213660_SGN-U313699	-0.00416022	SGN-U214336_SGN-U315026	-0.0150073	SGN-U213463_SGN-U313505	-0.0492227	SGN-U212922_SGN-U314797	-0.0265619
initro2phenylethane	SGN-U219533_SGN-U321805	0.0755516	SGN-U217788_SGN-U319348	-0.0400934	SGN-U216919_SGN-U317363	0.0205841	SGN-U213236_SGN-U313001	-0.0673944	SGN-U223548_SGN-U325688	0.0897547	SGN-U216635	-0.142668	SGN-U213704_SGN-U313542	-0.143486	SGN-U214480_SGN-U312632	-0.13303	SGN-U217919_SGN-U317038	0.0307816	SGN-U214106_SGN-U314046	-0.028356	SGN-U218721_SGN-U316258	0.149929	SGN-U215800_SGN-U316687	-0.255196	SGN-U225427_SGN-U327265	0.071889	SGN-U218286_SGN-U318054	0.0148655	SGN-U218181	0.0438833	SGN-U214530_SGN-U314984	0.0222352	SGN-U228237_SGN-U321591	-0.00433578	SGN-U223015_SGN-U325383	-0.0478534	SGN-U222728_SGN-U324061	-0.118113
EE_24decadienal	SGN-U219672_SGN-U320757	0.0936104	SGN-U216051_SGN-U317389	-0.091505	SGN-U218774_SGN-U318627	-0.0957958	SGN-U213238_SGN-U312999	-0.185719	SGN-U214351_SGN-U315295	-0.00995229	SGN-U221804	0.15052	SGN-U213323_SGN-U313209	-0.104641	SGN-U215031	0.0159051	SGN-U217621_SGN-U319267	0.0600855	SGN-U215845_SGN-U317214	0.0349865	SGN-U232939	-0.0474852	SGN-U214286_SGN-U314862	-0.029354	SGN-U219249_SGN-U321160	0.0174458	Y12640	0.114459	SGN-U227473_SGN-U328248	-0.243155	SGN-U214101_SGN-U314188	0.0833099	SGN-U212922_SGN-U314797	0.0704881	SGN-U224032_SGN-U324114	-0.051583
Eugenol	SGN-U221768_SGN-U322835	-0.00863612	SGN-U218315_SGN-U320077	-0.029886	SGN-U221913_SGN-U324313	0.254268	SGN-U230947	0.00502983	SGN-U219519	-0.101693	SGN-U216590_SGN-U322191	-0.235578	SGN-U216202_SGN-U317861	-0.0530269	SGN-U216321_SGN-U317916	0.181401	SGN-U218603	-0.0229587	SGN-U217924_SGN-U318543	-0.00474188	SGN-U213931_SGN-U313790	-0.10474	SGN-U218181	-0.161148	SGN-U214550_SGN-U315584	0.0335332	SGN-U214373_SGN-U314065	-0.0460516	SGN-U215435	-0.0869195	SGN-U221971_SGN-U325636	0.124089	SGN-U216516_SGN-U318235	-0.0462984
Bdamascenone	SGN-U213682_SGN-U313246	-0.00334684	SGN-U220612_SGN-U320695	-0.0892329	SGN-U213909_SGN-U314670	-0.0325792	SGN-U224729	-0.0184787	SGN-U220206_SGN-U322797	-0.0108783	SGN-U219825_SGN-U321518	-0.0342802	SGN-U215673_SGN-U317302	0.0315363	SGN-U221220_SGN-U324417	-0.0836297	SGN-U225520_SGN-U314245	-0.0908822	SGN-U225547_SGN-U314256	0.0658046	SGN-U226856_SGN-U329844	-0.0254402	SGN-U216454	0.032082	SGN-U217978_SGN-U317099	-0.0866248	SGN-U230638_SGN-U317456	0.127259	SGN-U215447_SGN-U331578	-0.100127	SGN-U212715_SGN-U312391	0.116307	SGN-U219235_SGN-U320039	0.131337	SGN-U220026_SGN-U322193	-0.0288839	SGN-U218747_SGN-U320141	-0.0559462	SGN-U222131_SGN-U324214	-0.0998365	SGN-U216272_SGN-U316761	-0.171894	SGN-U217898	-0.0636131
Geranylacetone	SGN-U214293_SGN-U315395	0.0357241	SGN-U226970_SGN-U324582	-0.011344	SGN-U219638_SGN-U319718	0.0496877	SGN-U219368	0.0667317	SGN-U217203_SGN-U318993	0.0751336	SGN-U218332_SGN-U318567	-0.0365327	SGN-U215838_SGN-U317658	0.0227654	SGN-U213061_SGN-U312800	-0.319472	SGN-U217068	0.084168	SGN-U221510_SGN-U318018	0.033253	SGN-U225308_SGN-U326666	-0.0134726	SGN-U215229_SGN-U316401	-0.138464	SGN-U224697	0.0606191	SGN-U216341	0.145746	SGN-U212715_SGN-U312391	0.107232	SGN-U215233_SGN-U316826	0.0251534	SGN-U224088_SGN-U337714	-0.0181092	SGN-U226377_SGN-U326678	0.120103	SGN-U215277_SGN-U315318	0.0861025	SGN-U217989_SGN-U320072	-0.0501852
Bionone	SGN-U221880_SGN-U320355	-0.0758819	SGN-U223624_SGN-U325565	-0.0211801	SGN-U217931_SGN-U320118	0.0341349	SGN-U219265_SGN-U321161	-0.22539	SGN-U213130_SGN-U314753	0.064018	SGN-U222729_SGN-U324934	0.0799706	SGN-U218621_SGN-U319428	-0.0956259	SGN-U215468_SGN-U315351	0.107397	SGN-U218626_SGN-U318959	-0.109227	SGN-U213199_SGN-U312991	0.0987729	SGN-U215233_SGN-U316826	0.102966	SGN-U213616_SGN-U334029	-0.0354086	SGN-U218791_SGN-U320071	0.0908291	SGN-U218565_SGN-U320674	0.0999625	SGN-U221446	0.0672412	SGN-U217827_SGN-U320178	0.0462693	SGN-U235037_SGN-U321406	0.00202031	SGN-U232590_SGN-U334227	-0.126428	SGN-U223178_SGN-U318572	-0.0172763
Benzophenone	SGN-U219529	-0.139406	SGN-U227718_SGN-U327266	-0.236053	SGN-U218261_SGN-U318651	-0.151758	SGN-U214313_SGN-U314022	0.0432072	SGN-U213666_SGN-U313769	-0.106185	SGN-U214905	-0.0156303	SGN-U220175_SGN-U319378	-0.019569	SGN-U222167_SGN-U323525	0.108351	SGN-U227391_SGN-U323394	0.0363727	SGN-U213191_SGN-U312851	-0.0394519	SGN-U228269_SGN-U329064	-0.0159942	SGN-U214986_SGN-U316243	-0.121616	SGN-U217557_SGN-U318086	0.0802333	SGN-U212551_SGN-U312891	-0.00218342	SGN-U226400_SGN-U326045	0.0399326	SGN-U239556_SGN-U342488	0.0107223	SGN-U226059_SGN-U328067	-0.116586	SGN-U214000_SGN-U313843	-0.105289	SGN-U217153_SGN-U319229	0.11146
[truncated: 1 more columns]

## Sheet: agronomical_properties
Metabolite	number of fruits	harvest fruit	average weight	pH		number of fruits		#95% confidence parameter range		harvest fruit				metabolite				metabolite
atocopherol_FW	0	0.0457277	0.0272795	0.00989202		metabolite	parameter	min_par	max_par		parameter	min_par	max_par	average weight	parameter	min_par	max_par	pH	parameter	min_par	max_par
bcaroteno_FW	-0.0173827	0	0.0152642	0		EE_24hexadien1al	0.274765	-0.329583	1.0617	atocopherol_FW	0.328534	-0.112992	0.364449	ipenten3one	0.346436	0.0910193	0.91319	ipenten3ol	0.303798	0.0487389	0.913932
Lycopene_FW	-0.0966242	-0.238715	-0.130713	0.103072		Pentanal	0.267542	-0.0464726	0.721971	Lycopene_FW	0.240409	-0.528801	0.00406231	Terpineol	0.342053	0.350093	1.08105	EE_24decadienal	0.273787	0.0904334	0.843204
Titratable_acidity	0	-0.11039	-0.0690719	-0.482176		Decanal	0.250864	-0.187093	0.798209	Titratable_acidity	0.193942	-0.389414	0.0454984	Benzophenone	0.31772	0.0834048	0.520816	Citric_acid	0.168303	0.0204316	0.365065
TSS	0.133393	-0.0726948	-0.233481	0.0830284		Eugenol	0.171608	-0.046603	0.402811	TSS	0.187131	-0.243964	0.197802	initro2phenylethane	0.288647	0.0862612	0.463148	Octanal	0.16563	-0.139504	0.416996
Citric_acid	0	0	-0.00442713	0.168303		iiisobutylthiazol	0.15222	-0.0460676	0.416081	Malic_acid	0.147395	-0.167901	0.174859	iipentylfuran	0.230094	0.118503	0.790094	iimethyl1butanol	0.126809	0.0394302	0.567834
Fructose	0.0992683	0	-0.030563	0		TSS	0.133393	-0.151643	0.401107	Vitamine_C	0.128872	-0.16292	0.214708	iiimethylbutanenitrile	0.158591	0.13075	0.667285	Eugenol	0.109634	-0.0181248	0.32234
Glucose	0	0	0	-0.0248816		Benzaldehyde	0.113811	-0.069447	0.401252	Ethanol	0.111782	-0.518802	-0.0544913	iiethylhexanoic_acid	0.129707	0.0379708	0.302172	Ethanol	0.108801	-0.0785761	0.270727
Malic_acid	0.0440855	0.0308435	0	0		iimethyl1propanol	0.103935	-0.0798426	0.499184	Acetone	0.111093	-0.310943	0.163174	iiethylfuran	0.109455	-0.0960912	0.554446	Lycopene_FW	0.103072	-0.129612	0.28449
Sucrose	-0.0117044	0	-0.0280131	-0.00819126		iiphenylethanol	0.100861	-0.0972342	0.593129	iimethyl1propanol	0.0919195	-0.0554915	0.442288	Geranylacetone	0.0853352	0.00444323	0.41085	iiimethylbutanoic_acid	0.0981311	-0.107384	0.364022
Vitamine_C	0.015516	0.00545987	0	-0.0696594		Fructose	0.0992683	-0.0648282	0.45108	iimethylbutanal	0.0834339	-0.092394	0.575243	Geranial	0.0277454	-0.199653	0.315596	E_2pentenal	0.0923782	-0.096864	0.789016
Ethanol	-0.0076299	-0.186623	-0.0728589	0.108801		E_2methyl2butenal	0.0982461	-0.132821	0.507945	ipenten3one	0.0833792	-0.148267	1.00364	atocopherol_FW	0.0272795	-0.0673973	0.273559	TSS	0.0830284	-0.0379349	0.388863
Acetone	-0.0341092	-0.0752293	-0.0639363	0		Octanal	0.0806113	-0.482219	0.778953	iiethylfuran	0.0825855	-0.487353	0.528699	Benzylacohol	0.0237693	-0.10369	0.164153	E_2hexenal	0.069397	-0.0740247	0.321564
iimethylpropanal	0	0	-0.00813748	0		Geranial	0.0781955	-0.276181	0.462986	iiimethylbutanenitrile	0.0819383	-0.120456	0.501258	Phenylacetaldehyde	0.0183047	-0.148573	0.191752	iiisobutylthiazol	0.0493087	-0.126741	0.208418
iimethyl1propanol	0.103935	0.147395	0.00923084	0		E_2hexenal	0.0781522	-0.122799	0.396925	iimethyl1butanol	0.0709979	-0.851524	-0.179237	bcaroteno_FW	0.0152642	-0.0862234	0.260561	iiimethylbutanal	0.0124932	-0.0691137	0.525327
iiimethylbutanal	0.0716807	0	-0.155419	0.0124932		Z_3hexenal	0.0766427	-0.633085	0.755455	E_2methyl2butenal	0.0707215	-0.332227	0.204563	iimethyl1propanol	0.00923084	-0.0923262	0.25871	atocopherol_FW	0.00989202	-0.181001	0.197893
Butanol	0	0	0	-0.0765929		iiimethylbutanal	0.0716807	-0.18696	0.602617	E_2pentenal	0.0637681	-0.847223	0.292198	Z_3hexen1ol	0.00888616	-0.117082	0.103797	Phenylacetaldehyde	0.00981057	-0.141234	0.48103
iimethylbutanal	0	0.0409299	0	-0.0203896		Benzylnitrile	0.067813	-0.18934	0.440603	ipentanol	0.0457277	-0.512983	0.410369	Citric_acid	-0.00442713	-0.19543	0.114939	Hexanoic_acid	0.00534985	-0.266261	0.224224
ipenten3ol	-0.0245492	0	0	0.303798		Nonanal	0.0664936	-0.8421	0.956271	Z_3hexenal	0.0454887	-0.0216219	1.27025	Octanal	-0.00694566	-0.250517	0.515374	Sucrose	-0.00819126	-0.189384	0.0673882
ipenten3one	0	0.328534	0.346436	-0.263689		Geranylacetone	0.0567036	-0.338643	0.26914	iiimethylbutanoic_acid	0.0409299	-0.525398	0.0262808	iimethylpropanal	-0.00813748	-0.120156	0.0972061	Bionone	-0.0092882	-0.292388	0.120595
Pentanal	0.267542	0	-0.0882819	0		Guaiacol	0.0518458	-0.202491	0.349934	E_2hexenal	0.0308435	-0.0223809	0.447622	iiisobutylthiazol	-0.0117649	-0.19858	0.0967274	iiethylhexanoic_acid	-0.00998886	-0.147152	0.189454
iiethylfuran	0	0.0232639	0.109455	-0.0970325		Bdamascenone	0.0469306	-0.13493	0.27689	Z_3hexen1ol	0.0232639	-0.197295	0.124074	Sucrose	-0.0280131	-0.125087	0.0956744	Benzophenone	-0.0120452	-0.240871	0.242891
iiimethylbutanenitrile	-0.108368	0.0454887	0.158591	-0.0979242		Malic_acid	0.0440855	-0.142216	0.303387	Pentanoic_acid	0.0154411	-0.250934	0.212424	Fructose	-0.030563	-0.257744	0.0688256	Terpineol	-0.0121532	-0.216957	0.0902964
iiimethylbutanol	0	0	0	0		apinene	0.0388891	-0.231359	0.33981	EE_24hexadien1al	0.0131927	-1.0785	0.113218	Guaiacol	-0.0368576	-0.256239	0.073438	E_2methyl2butenal	-0.0198901	-0.319975	0.155144
iimethyl1butanol	-0.253108	-0.337206	-0.0453209	0.126809		Bionone	0.0185952	-0.16924	0.50616	apinene	0.0114917	-0.506108	0.0344587	iimethyl1butanol	-0.0453209	-0.355217	0.0822883	iimethylbutanal	-0.0203896	-0.395417	0.143143
E_2methyl2butenal	0.0982461	-0.0117589	-0.154751	-0.0198901		Vitamine_C	0.015516	-0.179983	0.23274	Hexanoic_acid	0.00545987	-0.372709	0.245889	E_2Octenal	-0.0550924	-0.334974	0.17198	Glucose	-0.0248816	-0.26965	0.0962763
E_2pentenal	-0.157071	-0.201736	-0.0667317	0.0923782		Linalool	0.0149922	-0.168133	0.252062	E_2heptenal	-0.00336632	-0.870242	0.125322	Nonanal	-0.0558217	-0.683412	0.257617	Benzylacohol	-0.0298849	-0.278711	0.0591115
ipentanol	0	0.0825855	0	-0.276438		Acetophenone	0.00568237	-0.317717	0.347331	Benzaldehyde	-0.0117589	-0.238884	0.312995	E_2heptenal	-0.0568239	-0.487605	0.193446	Acetophenone	-0.0323791	-0.224706	0.24177
Z_3hexenal	0.0766427	0.193942	0	0		Octanoic_acid	0.00301031	-0.157628	0.348235	6methyl5hepten2one	-0.0122132	-1.03144	0.168605	Hexanoic_acid	-0.0634615	-0.288414	0.0988797	Octanoic_acid	-0.0330609	-0.416163	0.0634042
Hexanal	0.0027909	0	0	-0.189199		Hexanal	0.0027909	-0.412476	0.394813	iipentylfuran	-0.019258	-0.0954823	0.761058	Acetone	-0.0639363	-0.230358	0.112273	ptolualdehyde	-0.0334099	-0.227315	0.117667
iiimethylbutanoic_acid	0	-0.181387	-0.163469	0.0981311		Ethylsalicylate	0.000245116	-0.207966	0.311948	Octanal	-0.0249283	-0.0753725	0.532124	E_2pentenal	-0.0667317	-0.601234	0.239786	Guaiacol	-0.0413634	-0.35836	0.0511261
E_2hexenal	0.0781522	0.111093	0	0.069397		iiethylhexanoic_acid	-0.00694659	-0.234959	0.185694	Benzylacohol	-0.0259882	-0.2021	0.297324	Titratable_acidity	-0.0690719	-0.229337	0.0807095	iipentylfuran	-0.0544195	-0.400022	0.287698
Z_3hexen1ol	-0.0234555	-0.0259882	0.00888616	0		Ethanol	-0.0076299	-0.309762	0.242762	iiisobutylthiazol	-0.0261746	-0.135014	0.268651	Ethanol	-0.0728589	-0.246987	0.029367	Vitamine_C	-0.0696594	-0.271455	0.0573227
Pentanoic_acid	0	-0.019258	0	0		Sucrose	-0.0117044	-0.179139	0.16337	Phenylacetaldehyde	-0.0392749	-0.654393	0.0672463	Bdamascenone	-0.0802988	-0.24797	0.0156815	iiphenylethanol	-0.0715243	-0.47957	0.0858079
EE_24hexadien1al	0.274765	-0.0122132	-0.16818	0		bcaroteno_FW	-0.0173827	-0.342799	0.184662	iiethylhexanoic_acid	-0.0527988	-0.0195319	0.341206	Bionone	-0.0874815	-0.453131	-0.0228659	Butanol	-0.0765929	-0.296725	0.138329
apinene	0.0388891	-0.0943271	-0.177612	0		Z_3hexen1ol	-0.0234555	-0.199829	0.160811	Guaiacol	-0.0573296	-0.447813	0.0789386	Pentanal	-0.0882819	-0.499344	0.00121362	Bdamascenone	-0.080025	-0.230493	0.0787135
Hexanoic_acid	0	-0.0261746	-0.0634615	0.00534985		ipenten3ol	-0.0245492	-0.522155	0.400753	Linalool	-0.0639874	-0.715462	0.19689	Eugenol	-0.0986372	-0.294228	-0.00498944	iiethylfuran	-0.0970325	-0.552212	0.0106246
E_2heptenal	-0.0267256	-0.279456	-0.0568239	0		E_2heptenal	-0.0267256	-0.605136	0.477071	iiphenylethanol	-0.0726948	-0.0761712	0.57523	Lycopene_FW	-0.130713	-0.396985	-0.0139029	iiimethylbutanenitrile	-0.0979242	-0.573423	0.0352373
Benzaldehyde	0.113811	0.0637681	0	0		Acetone	-0.0341092	-0.361884	0.202998	Decanal	-0.0752293	-0.3553	0.328473	Linalool	-0.147327	-0.854721	-0.142128	Hexanal	-0.189199	-0.418933	0.212167
6methyl5hepten2one	0	-0.0639874	0	0		ptolualdehyde	-0.0583669	-0.313892	0.163772	Terpineol	-0.0754167	0.025756	0.951669	E_2methyl2butenal	-0.154751	-0.407248	-0.0150447	Methylsalicylate	-0.200838	-0.376727	0.00420303
iipentylfuran	-0.302745	0.0919195	0.230094	-0.0544195		Lycopene_FW	-0.0966242	-0.329478	0.133769	Methylsalicylate	-0.0943271	-0.214426	0.242176	iiimethylbutanal	-0.155419	-0.480581	-0.00286632	initro2phenylethane	-0.211114	-0.560818	-0.0742294
Octanal	0.0806113	0.111782	-0.00694566	0.16563		iiimethylbutanenitrile	-0.108368	-0.667771	0.100772	Geranial	-0.11039	-0.283514	0.989579	iiimethylbutanoic_acid	-0.163469	-0.441892	-0.0264774	Decanal	-0.25282	-0.525469	0.00304668
Benzylacohol	0	0.0154411	0.0237693	-0.0298849		E_2pentenal	-0.157071	-0.727478	0.320551	Ethylsalicylate	-0.181387	-0.0102084	0.434207	EE_24hexadien1al	-0.16818	-0.567909	0.0437839	ipenten3one	-0.263689	-1.15039	-0.0868854
iiisobutylthiazol	0.15222	0.0833792	-0.0117649	0.0493087		initro2phenylethane	-0.227024	-0.687567	-0.00776546	initro2phenylethane	-0.186623	-0.304199	0.227126	apinene	-0.177612	-0.405611	-0.0465891	ipentanol	-0.276438	-0.794813	0.0711499
Phenylacetaldehyde	-0.23153	-0.0754167	0.0183047	0.00981057		Phenylacetaldehyde	-0.23153	-0.698578	-0.0216749	Eugenol	-0.201736	-0.282532	0.129723	TSS	-0.233481	-0.387133	-0.0239157	Titratable_acidity	-0.482176	-0.742222	-0.395801
E_2Octenal	0	0	-0.0550924	0		iimethyl1butanol	-0.253108	-0.773044	-0.0420867	Bdamascenone	-0.238715	-0.256109	0.093493
Acetophenone	0.00568237	0	0	-0.0323791		iipentylfuran	-0.302745	-0.913727	0.100436	Geranylacetone	-0.279456	0.0586144	0.547421
iiethylhexanoic_acid	-0.00694659	0.128872	0.129707	-0.00998886		Benzophenone	-0.327271	-0.750142	-0.0919634	Bionone	-0.337206	-0.346111	0.154432
Guaiacol	0.0518458	-0.0392749	-0.0368576	-0.0413634
ptolualdehyde	-0.0583669	0	0	-0.0334099
Linalool	0.0149922	-0.0573296	-0.147327	0
Nonanal	0.0664936	0	-0.0558217	0
iiphenylethanol	0.100861	0.0834339	0	-0.0715243
Octanoic_acid	0.00301031	0	0	-0.0330609
Benzylnitrile	0.067813	0	0	0
Decanal	0.250864	0.0709979	0	-0.25282
Terpineol	0	0.240409	0.342053	-0.0121532
Methylsalicylate	0	0.0131927	0	-0.200838
Geranial	0.0781955	0.0707215	0.0277454	0
Ethylsalicylate	0.000245116	0.0819383	0	0
initro2phenylethane	-0.227024	0.0114917	0.288647	-0.211114
EE_24decadienal	0	0	0	0.273787
Eugenol	0.171608	-0.00336632	-0.0986372	0.109634
Bdamascenone	0.0469306	-0.0527988	-0.0802988	-0.080025
Geranylacetone	0.0567036	0.187131	0.0853352	0
Bionone	0.0185952	-0.0249283	-0.0874815	-0.0092882
Benzophenone	-0.327271	0	0.31772	-0.0120452
