# Supplementary material for: Fine-Tuning Tomato Agronomic Properties by Computational Genome Redesign
Source: PLoS Comput Biol. 2012 Jun 7;8(6):e1002528. doi: 10.1371/journal.pcbi.1002528 (PMC3369923; doi:10.1371/journal.pcbi.1002528)
Supplement: Dataset S3 — Multiple combinations of knockout and over-expressed gene sets to improve desired agronomic properties (acceptability, quality and quality vs production of tomato fruits). (XLS) [file pcbi.1002528.s003.xls]

## Sheet: single_KO-OE
The first column for each fitness was related to "sgn2"-genes and the second was referred to "sgn3"-genes
Notice that Fitness=6 is ranked from genes with the highest Score while Fitness=5, 57, 74 and 75 are ranked from genes with highest efficiency
Fitnes=5(acceptability), 6(quality) and 74(qualitiy vs production); 17(Vitamine C), 76(fructose+glucose) and 77(citric and malic acids)
KO / over-expression of genes with median efficiency (opt/wt) > 3%(fit=5), >100%(fit=6) and >20%(fit=74)
Perturbation	KO(id<0)/OE(id>0)
Fitness	5				6				74
Scored genes	LE33G22	-941	LE28J07	-819	LE27F15	790	LE29L05	845	LE13F06	363	LE15J03	431
	LE15D09	-428	LE33G22	-941	LE16D08	450	LE6G08	160	LE12O13	319	LE33G22	941
	LE17M21	-468	LE33G22	-941	LE9A08	233	LE15E23	413	LE2C24	39	LE29J02	838
	LE17D17	-483	LE33G22	-941	LE18E13	492	LE8A19	206	LE12P11	342	LE2C24	39
	LE15E19	-412	LE33G22	-941	LE32B05	920	LE4D06	106	LE2C24	39	LE21J01	604
	LE7I21	-179	LE33G22	-941	LE15L08	-424	LE4J06	109	LE12O13	319	LE25M06	710
	LE33G22	-941	LE23K21	-634	LE29E13	822	LE13F06	363	LE12O13	319	LE14B20	396
	LE33G22	-941	LE2C08	-38	LE13F06	363	LE15J03	431	LE14B20	396	LE21J01	604
	LE33G22	-941	LE25J09	-728	LE17G02	471	LE15D07	427	LE33B09	953	LE2C24	39
	LE33G22	-941	LE24D10	-670	LE15D07	427	LE20I03	553	LE18M21	-499	LE14B20	396
	LE21P10	-599	LE33G22	-941	LE11K19	285	LE6M05	154	LE17G02	-471	LE12O13	319
	LE33G22	-941	LE16P01	-462	LE21I20	586	LE15D07	427	LE7I20	192	LE10M06	271
	LE33G22	-941	LE33G22	-941	LE15D07	427	LE32I04	909	LE7A04	-183	LE12O13	319
	LE1P09	-29	LE33G22	-941	LE11N11	309	LE9A08	233	LE27J22	-787	LE14B20	396
	LE33G22	-941	LE8I04	-217	LE8A19	206	LE25P19	-732	LE7F05	199	LE14B20	396
	LE12O13	319	LE33G22	941	LE15L08	424	LE3N10	74	LE14B20	396	LE10C22	-265
	LE13M10	361	LE33A03	928	LE15D07	427	LE23N08	-647	LE26J07	-759	LE14B20	396
	LE13M10	361	LE3G06	-66	LE15D07	427	LE14G07	-383	LE13F06	363	LE5L09	145
	LE25K18	-708	LE13M10	361	LE15D07	427	LE30J09	-871	LE2C24	39	LE33J04	-949
	LE8C24	215	LE32D10	914	LE8A19	206	LE13P11	377	LE12A10	321	LE13F06	363
	LE13M10	361	LE17K20	-473	LE9M18	244	LE15D07	427	LE14B20	396	LE13L04	367
	LE30P19	875	LE32M02	912	LE15D07	427	LE16D22	452	LE14B20	396	LE24D10	-670
	LE19J02	541	LE25N18	-719	LE15D07	427	LE14I04	-394	LE15F07	430	LE23K10	641
	LE20I22	-559	LE13M10	361	LE30P05	874	LE15D07	427	LE12J19	338	LE14M13	388
	LE13M10	361	LE2F02	-47	LE15D07	427	LE7D01	198	LE18A23	-491	LE14B20	396
	LE4K23	94	LE12C23	-316	LE17K20	-473	LE15D07	427	LE14B20	396	LE9F04	-246
	LE15F07	430	LE23K10	641	LE30P19	875	LE32M02	912	LE16P01	462	LE33J04	-949
	LE3O23	63	LE18K23	-496	LE8G20	216	LE6E22	159	LE5I22	-126	LE14B20	396
	LE11F03	304	LE13C15	-346	LE20I03	553	LE24H22	673	LE31M07	-882	LE14B20	396
	LE11O14	292	LE21P16	600	LE3D05	80	LE15D07	427	LE29L05	845	LE18O22	506
	LE30E01	-850	LE11F03	304	LE7E18	186	LE15D07	427	LE14B20	396	LE25G07	-694
	LE2K22	-43	LE11F03	304	LE29L11	846	LE13F06	363	LE14B20	396	LE30D03	-867
	LE11F03	304	LE29C10	-831	LE4M10	-104	LE15D07	427	LE14B20	396	LE1J04	18
	LE21G08	-584	LE11F03	304	LE15D07	427	LE6G23	153	LE14B20	396	LE27N13	-796
	LE27L21	-795	LE11F03	304	LE21K09	-578	LE15D07	427	LE1K08	-10	LE14B20	396
	LE10E02	-266	LE11F03	304	LE15D07	427	LE17I11	-466	LE19I19	525	LE14B20	396
	LE22K20	616	LE21O12	589	LE23C04	-637	LE15D07	427	LE14B20	396	LE3M09	62
	LE5B23	140	LE16B20	448	LE24H22	673	LE15D07	427	LE1G11	2	LE14B20	396
	LE17I11	-466	LE11F03	304	LE31I24	886	LE15D07	427	LE14B20	396	LE14G07	-383
	LE12E08	-324	LE11F03	304	LE15D07	427	LE15D07	427	LE32J15	-925	LE14B20	396
	LE6M05	154	LE6H16	169	LE15D07	427	LE20C22	-556	LE14B20	396	LE3L24	-73
	LE25G17	-696	LE28K19	801	LE15D07	427	LE7M09	-181	LE20I03	553	LE12J19	338
	LE18N13	-520	LE11F03	304	LE15D07	427	LE33M04	-945	LE6M11	155	LE14B20	396
	LE25C17	-688	LE10C22	265	LE27J17	-794	LE15D07	427	LE14B20	396	LE26B11	-755
	LE8C21	-209	LE12C23	-316	LE29L05	-845	LE16D08	450	LE32M02	-912	LE14B20	396
	LE12P11	-342	LE11F03	304	LE14I09	-385	LE15D07	427	LE2C24	39	LE24H22	673
	LE9I20	-241	LE31B15	893	LE27B06	781	LE27G12	773	LE5L20	-135	LE14B20	396
	LE8E05	-211	LE31B15	893	LE15D07	427	LE1I11	4	LE25D21	724	LE2C24	39
	LE12C23	316	LE5I07	-119	LE30M01	854	LE14D10	397	LE14B20	396	LE27O11	-768
	LE25N18	-719	LE18P06	513	LE15D07	427	LE25G16	706	LE2C24	39	LE27C15	763
	LE31B15	893	LE25G03	-693	LE7D01	198	LE15L08	424	LE23E19	630	LE2C24	39
	LE5B03	-138	LE31B15	893	LE11N14	-298	LE15D07	427	LE4E16	98	LE5L09	145
	LE30E01	-850	LE32K06	910	LE30K12	859	LE15D07	427	LE14B20	396	LE9A21	227
	LE8A19	206	LE33G22	941	LE1G11	2	LE13F23	373	LE16P01	462	LE8A19	206
	LE31B15	893	LE22H05	-623	LE15I13	-416	LE15D07	427	LE20I03	553	LE31C07	-879
	LE31B15	893	LE10K18	-270	LE13F06	363	LE20K24	562	LE29L04	-841	LE22L17	625
	LE32K06	910	LE6H02	-167	LE25E12	703	LE15D07	427	LE2C24	39	LE16D20	-451
	LE31B15	893	LE1K24	-13	LE15D07	427	LE29L11	-846	LE12J19	-338	LE2C24	39
	LE33G20	-940	LE32K06	910	LE15L08	424	LE30P19	875	LE2C24	-39	LE6P11	178
	LE32K06	910	LE29N03	-847	LE20K20	-561	LE15D07	427	LE3O23	63	LE18K23	-496
	LE11F03	304	LE13A20	-352	LE15D07	427	LE4N07	-114	LE14B20	396	LE23K13	633
	LE15I13	416	LE8C01	-207	LE13C03	345	LE15D07	427	LE9M18	244	LE27I21	766
	LE25N18	-719	LE8C24	-215	LE15D07	427	LE21M20	-588	LE13J08	-366	LE10G13	-261
	LE12A10	321	LE28A14	802	LE27E03	-764	LE15D07	427	LE7H17	-201	LE20I03	-553
	LE9H08	248	LE6H16	-169	LE19J24	-543	LE15D07	427	LE27F15	790	LE29L05	845
	LE32D10	914	LE33F10	946	LE15L08	424	LE19I14	-535	LE9E10	238	LE27P11	-797
	LE25M02	709	LE25N18	-719	LE20E08	-557	LE15D07	427	LE2C24	39	LE6M11	-155
	LE13C15	346	LE29N13	848	LE23E19	630	LE15N24	426	LE5M13	121	LE30M09	-855
	LE33B09	-953	LE16J12	454	LE15D07	427	LE26J07	759	LE6H13	-176	LE5F02	131
	LE12C23	-316	LE33M05	935	LE8G20	216	LE23K21	634	LE16P01	462	LE21P16	600
	LE8I04	217	LE14E03	-381	LE2F02	-47	LE15D07	427	LE5F02	131	LE15L08	424
	LE32K06	910	LE21C14	-583	LE9E04	-236	LE27G12	773	LE6H11	-175	LE2C24	39
	LE17D06	476	LE24P16	678	LE13F06	363	LE26N09	-760	LE26J07	759	LE16P01	462
	LE14B20	396	LE10C22	-265	LE13F23	373	LE8A08	212	LE2C24	39	LE11H05	307
	LE32D10	914	LE6M11	-155	LE29O17	-830	LE4C09	91	LE24D10	670	LE1G11	2
	LE14G22	-393	LE25E12	-703	LE19L21	-546	LE15D07	427	LE21J01	604	LE3D05	80
	LE10I24	-269	LE32D10	914	LE14P10	401	LE29L05	845	LE12E14	325	LE3H15	83
	LE12A10	321	LE11H20	-296	LE15D07	427	LE24P24	679	LE27E11	765	LE8A19	206
	LE16M17	-441	LE8C24	-215	LE23M14	643	LE24H22	673	LE21J01	604	LE6M05	154
	LE16B11	457	LE11N21	311	LE8A19	206	LE14J14	-399	LE17H04	479	LE25B15	-721
	LE12C23	316	LE14M14	-395	LE16J12	454	LE29J02	838	LE12C13	-315	LE16L04	455
	LE12C23	-316	LE17G22	-472	LE24I20	665	LE6M05	154	LE2C24	39	LE26C07	736
	LE17B07	481	LE11L01	-957	LE18O22	-506	LE2L05	55	LE10H23	279	LE12J19	338
	LE17G02	-471	LE32D10	914	LE21F17	603	LE30M01	854	LE13C24	-354	LE2C24	39
	LE32D10	914	LE1C02	-7	LE6P11	178	LE27G12	773	LE2C24	39	LE19H20	-540
	LE12J16	-334	LE9I20	241	LE15D07	427	LE13A20	-352	LE12A10	321	LE28A14	802
	LE10C22	265	LE7E18	-186	LE12A21	314	LE15L08	424	LE18O22	506	LE31I21	881
	LE23M14	-643	LE12C23	-316	LE22G01	612	LE8A19	206	LE2C24	39	LE4N21	-115
	LE1L09	28	LE3I05	-61	LE13F06	363	LE9O01	-232	LE25N11	-731	LE2C24	39
	LE13C24	-354	LE32K06	910	LE15L08	424	LE15I14	-420	LE2C24	39	LE33M04	-945
	LE10C22	265	LE30D23	-868	LE16D08	450	LE16C04	442	LE15E19	412	LE12A10	321
	LE11K19	-285	LE6H16	-169	LE4E16	98	LE15D07	427	LE17H04	479	LE12J19	-338
	LE25B15	-721	LE15M07	417	LE7L20	-438	LE15L08	424	LE13C03	-345	LE13J08	-366
	LE15E19	412	LE12A10	321	LE28O04	810	LE27C02	769	LE26B11	755	LE2C24	39
	LE12J21	-339	LE13C24	354	LE13F06	363	LE29H16	-837	LE30E01	-850	LE11F03	304
	LE12A10	321	LE19P07	-548	LE4E16	98	LE14L20	400	LE20E16	558	LE22M24	-618
	LE18K23	-496	LE15M07	417	LE23O09	-636	LE27C02	769	LE14B20	396	LE20L16	569
	LE18N13	520	LE32H05	924	LE8H10	222	LE8A19	206	LE18N13	-520	LE11F03	304
	LE15M07	417	LE16N07	-461	LE25C19	689	LE15D07	427	LE13J08	-366	LE27E06	-772
	LE11B13	300	LE8C13	-208	LE27C02	-769	LE24H22	673	LE15B04	421	LE2C24	39
	LE25N18	-719	LE9F20	247	LE15D07	427	LE14D15	404	LE21G08	-584	LE11F03	304
	LE17H01	-485	LE8C24	-215	LE15L08	424	LE14P14	-402	LE14M13	388	LE12P11	342
	LE10C22	265	LE18F22	511	LE13F06	363	LE4B21	113	LE23N08	647	LE5L09	145
	LE9M18	244	LE27I21	766	LE25G09	695	LE15D07	427	LE22M24	-618	LE23M07	635
	LE12C23	-316	LE29B16	-836	LE13F06	363	LE33J18	951	LE19N09	-547	LE2C24	39
	LE18P06	513	LE23E23	-631	LE29I07	824	LE8A19	206	LE6P11	178	LE16G02	443
	LE15L08	-424	LE10C22	-265	LE14J03	405	LE30M01	854	LE24D10	670	LE9C11	-230
	LE10C22	-265	LE20I03	-553	LE25E08	702	LE30M01	854	LE5F02	131	LE20F11	570
	LE29K01	-827	LE12C23	-316	LE15N24	426	LE21O01	-580	LE16L04	455	LE21N10	-598
	LE24N20	-675	LE15M07	417	LE13F06	-363	LE18F22	-511	LE31C07	879	LE4C09	91
	LE3D13	-81	LE12C23	-316	LE13F06	363	LE3M09	-62	LE1B05	25	LE20C03	551
	LE5L22	136	LE13M10	361	LE13F06	363	LE15G13	414	LE11D01	301	LE5E12	123
	LE9C22	-235	LE12C23	-316	LE3O14	-70	LE13F06	363	LE2K11	34	LE2C24	39
	LE12C23	-316	LE29F23	-844	LE10O22	274	LE23N08	647	LE11N13	-310	LE2C24	39
	LE8C24	-215	LE4I20	-101	LE27C24	771	LE29L05	845	LE16P01	-462	LE2C24	39
	LE10C22	-265	LE27O11	-768	LE8A19	206	LE23K13	633	LE12J19	338	LE21F14	594
	LE23K24	-642	LE4M17	95	LE21J03	-605	LE13F06	363	LE14B20	396	LE13L10	368
	LE6H16	-169	LE3P08	-76	LE12H20	331	LE13F06	363	LE1G11	2	LE2C24	39
	LE20O17	-555	LE12C23	-316	LE15L08	424	LE11F11	-306	LE9C22	235	LE2C24	39
	LE6A23	149	LE28A14	-802	LE15L08	424	LE32O17	-902	LE12A21	-314	LE17H04	479
	LE7L20	-438	LE7H17	201	LE7L24	195	LE18O22	506	LE2C24	39	LE16A13	-435
	LE32D10	914	LE8E05	-211	LE30P05	874	LE8A19	206	LE2C24	39	LE14M01	-387
	LE19G14	532	LE31H21	-895	LE31A10	884	LE13F06	-363	LE14M13	-388	LE28N04	-815
	LE9M18	-244	LE6H16	-169	LE15L08	424	LE17I11	-466	LE15L08	-424	LE11E05	283
	LE9L03	-255	LE8C24	-215	LE14A11	379	LE15D07	427	LE2C24	39	LE16D22	452
	LE11N11	309	LE9A08	233	LE15L08	424	LE20A19	-549	LE30P19	-875	LE2C24	39
	LE15M07	417	LE24F16	-671	LE10O22	274	LE29L05	-845	LE2C24	39	LE5I22	126
	LE19N09	-547	LE12C23	-316	LE11K19	-285	LE8A19	206	LE18K23	496	LE5F02	131
	LE14E15	-382	LE12C23	-316	LE3E12	65	LE18K23	496	LE12A10	321	LE19P07	-548
	LE18P14	-514	LE15M07	417	LE30J13	872	LE18O22	506	LE20K08	-560	LE5F02	131
	LE20C03	-551	LE16D08	450	LE15A11	-408	LE13F06	363	LE26N14	-751	LE5F02	131
	LE8C13	-208	LE27B06	781	LE27C02	769	LE22N03	626	LE4C09	91	LE12E14	325
	LE31N18	-892	LE6H16	-169	LE30P19	875	LE32B03	-919	LE31A11	-877	LE26P06	753
	LE12C23	-316	LE5E20	-124	LE19G23	-524	LE13F06	363	LE7N14	-196	LE2C24	39
	LE3N01	-89	LE15M07	417	LE3O23	-63	LE29L05	845	LE6H02	167	LE18D16	508
	LE17D14	477	LE7I21	179	LE19I21	526	LE15L08	424	LE25G09	-695	LE2C24	39
	LE24K20	-667	LE12J16	-334	LE13F06	363	LE17B07	-481	LE17A06	469	LE2C24	39
	LE24C15	-656	LE32K06	910	LE13F20	364	LE29J02	838	LE8A19	206	LE9F15	-254
	LE12P11	342	LE29E13	822	LE15L08	424	LE29J02	-838	LE2C24	39	LE2D06	46
	LE10C22	265	LE33I24	-943	LE17G02	471	LE29L05	845	LE14J14	399	LE27B06	781
	LE12C23	-316	LE19M21	-528	LE15L08	-424	LE11H19	308	LE10E02	-266	LE11F03	304
	LE6H16	-169	LE2K11	-34	LE30M01	854	LE29I07	824	LE9A14	-234	LE4E16	98
	LE15B04	-421	LE6H16	-169	LE13F06	363	LE5M10	128	LE24D10	670	LE1B05	-25
	LE12C23	-316	LE28L12	-814	LE30B07	866	LE15L08	-424	LE2C24	39	LE2K22	-43
	LE20A19	-549	LE19G14	532	LE29L05	845	LE14I19	386	LE25C19	689	LE15D07	427
	LE11B13	300	LE4G17	-93	LE18O22	506	LE19K24	537	LE23J18	-645	LE12L14	624
	LE13N05	-376	LE8C24	-215	LE22K20	616	LE25I05	698	LE27L21	-795	LE11F03	304
	LE16B20	-448	LE6H16	-169	LE20F06	-566	LE30M01	854	LE12L14	624	LE18C20	-500
	LE6H16	-169	LE24B09	-680	LE27C02	769	LE23K24	642	LE8A19	206	LE33G22	941
	LE11C05	-281	LE3L07	86	LE15I07	415	LE15L08	424	LE25G03	693	LE4C09	91
	LE29B16	-836	LE9C07	229	LE8A19	206	LE14L20	400	LE24B21	681	LE17H04	-479
	LE10G13	-261	LE10C22	265	LE15L08	424	LE21M07	579	LE6M05	154	LE6H16	169
	LE27B06	781	LE17D17	-483	LE23M07	635	LE4C09	91	LE15D07	427	LE20I03	553
	LE7H09	-200	LE12C23	-316	LE8A19	206	LE21B08	-591	LE21M07	579	LE31C07	879
	LE16O12	446	LE25M06	710	LE29M08	834	LE14G22	393	LE10B06	275	LE21J01	604
	LE10C22	-265	LE11H20	-296	LE13F06	363	LE24L10	674	LE3E07	-58	LE1H20	17
	LE18D24	509	LE13K23	349	LE13F06	363	LE18B07	515	LE29D09	843	LE12J19	338
	LE14G11	-384	LE12P11	342	LE4C09	91	LE12E14	325	LE17I11	-466	LE11F03	304
	LE17B07	481	LE26F13	756	LE33M04	-945	LE8A19	206	LE12C23	316	LE14M14	-395
	LE12J19	-338	LE17D14	477	LE13F06	363	LE3E12	-65	LE31D04	890	LE14J14	399
	LE6H16	-169	LE23J05	-652	LE5M13	121	LE30M09	-855	LE12L14	624	LE22D16	-622
	LE6H16	-169	LE7K12	-193	LE13F06	363	LE11D14	-294	LE15D07	427	LE14D15	404
	LE27O11	-768	LE12P11	342	LE3C14	64	LE13F06	363	LE3H15	83	LE33F14	947
	LE6H16	-169	LE25G02	-705	LE3L07	86	LE14M14	-395	LE2K22	-43	LE11F03	304
	LE22G01	612	LE31K20	888	LE4E16	98	LE13F06	363	LE32B05	920	LE4D06	106
	LE26E09	-738	LE6H16	-169	LE30M01	854	LE19G16	533	LE15D07	427	LE12J19	338
	LE6H16	-169	LE28A03	-799	LE9E04	-236	LE21G08	584	LE6P11	178	LE25B07	-720
	LE31C19	-880	LE6H16	-169	LE13E24	356	LE27C02	769	LE2L05	-55	LE2C24	39
	LE13G13	-347	LE6H16	-169	LE10O22	274	LE8A19	206	LE29L04	-841	LE15L08	-424
	LE6H16	-169	LE26D12	-746	LE8A19	206	LE32I04	909	LE4E16	98	LE13F06	363
	LE24M14	-669	LE15M07	417	LE30M09	855	LE29J02	838	LE12E08	-324	LE11F03	304
	LE6H16	-169	LE1G11	-2	LE15D07	427	LE12J19	338	LE11F03	304	LE13A20	-352
	LE6H16	-169	LE23J19	-653	LE33E01	-931	LE29L05	845	LE31M07	-882	LE21O22	590
	LE25D23	-725	LE15M07	417	LE33H21	956	LE16B20	448	LE12P11	-342	LE11F03	304
	LE10D01	-277	LE6H16	-169	LE15L08	-424	LE11E05	283	LE33C13	930	LE13F06	363
	LE15P07	-432	LE12C23	-316	LE18F22	511	LE15L08	424	LE15N24	426	LE2C24	39
	LE6H16	-169	LE25C19	-689	LE29L05	845	LE4K23	94	LE20I03	-553	LE33C20	-939
	LE10O22	274	LE23N08	647	LE8A19	206	LE26B11	755	LE3D05	80	LE15D07	427
	LE6H02	167	LE18D16	508	LE13F06	363	LE8I04	-217	LE28N04	815	LE16N07	461
	LE4K23	94	LE15H16	-422	LE17D13	482	LE13M10	361	LE13F20	364	LE17P03	490
	LE1K18	11	LE32D10	914	LE29L05	845	LE18A23	-491	LE19I21	-526	LE4E16	98
	LE12P11	342	LE2C24	39	LE23D06	644	LE8A19	206	LE12E14	325	LE31C19	880
	LE21M20	588	LE20C03	551	LE27F04	783	LE18O22	506	LE8G20	216	LE23K21	634
	LE3E12	-65	LE33M04	945	LE18O22	-506	LE21K07	577	LE15D07	427	LE25G16	706
	LE16A03	-434	LE4M17	95	LE13A13	344	LE4C09	91	LE31B15	893	LE12O13	319
	LE10C22	-265	LE15E23	-413	LE15I13	-416	LE30M01	854	LE14B20	-396	LE3H15	83
	LE14D10	397	LE10O01	-263	LE9C11	230	LE7I08	190	LE7N03	204	LE20I03	553
	LE31B20	889	LE3L07	86	LE11O10	291	LE4D06	106	LE4E16	98	LE15D07	427
	LE14B20	396	LE23K13	633	LE8A19	206	LE6E19	-152	LE4E16	98	LE12M01	318
	LE6H16	-169	LE20K24	-562	LE32B05	920	LE8A19	206	LE12J19	-338	LE3H15	83
	LE30A07	-849	LE16J12	454	LE3M09	-62	LE27C02	769	LE27P15	798	LE18D16	508
	LE18M17	-498	LE11F03	-304	LE10M06	271	LE30M01	854	LE31D04	890	LE1G11	2
	LE27H15	791	LE18E13	492	LE25J21	-730	LE27C02	769	LE15J03	-431	LE7N01	-203
	LE3P14	78	LE23N08	647	LE8A19	206	LE25I06	707	LE18D05	516	LE2C24	39
	LE4K23	94	LE23J19	-653	LE22A15	609	LE6M05	154	LE7F05	199	LE13H22	-365
	LE17D17	-483	LE4K23	94	LE25M02	709	LE13F06	363	LE8G20	216	LE6E22	159
	LE27B04	780	LE21B09	-601	LE8A08	-212	LE9D08	245	LE24D10	-670	LE12J19	338
	LE19M21	528	LE28I20	-806	LE26N08	-750	LE18F22	511	LE23D06	644	LE27J01	-792
	LE26A11	735	LE23E07	-627	LE7E18	186	LE27C02	769	LE16P01	462	LE30J13	872
	LE6H16	-169	LE5L09	-145	LE13L10	368	LE22K20	616	LE32B05	920	LE8A19	206
	LE6H16	-169	LE1J12	-19	LE11P21	-313	LE27C02	769	LE12O13	319	LE14G22	-393
	LE12P11	342	LE3N24	75	LE9K14	-243	LE30M01	854	LE8A19	206	LE31D04	890
	LE8L19	-224	LE14D10	397	LE27C02	769	LE17G02	471	LE24P24	679	LE6P11	178
	LE22M19	-613	LE33M04	945	LE27C02	769	LE27C24	-771	LE28K14	-809	LE27F15	790
	LE4K23	94	LE16P01	-462	LE29L05	-845	LE5B03	138	LE15J03	-431	LE25H13	-727
	LE19J10	542	LE32D10	914	LE8A19	206	LE8O22	219	LE2C24	39	LE6E19	152
	LE12P11	342	LE26N14	-751	LE13F20	364	LE22E07	-611	LE30P19	875	LE12J19	338
	LE25J10	-714	LE4K23	94	LE15G13	-414	LE5D08	130	LE27E06	772	LE4D06	106
	LE16F18	-453	LE33M04	945	LE30M01	854	LE6M05	154	LE23E12	640	LE29K24	833
	LE4K23	94	LE6O14	-164	LE18K23	-496	LE4J06	109	LE8A08	-212	LE3H15	83
	LE30P19	875	LE12J19	338	LE27P15	798	LE1G11	2	LE12J19	-338	LE17D14	477
	LE30P19	875	LE32B03	-919	LE8A19	206	LE21K07	-577	LE14J14	399	LE4E16	98
	LE18N13	-520	LE14D10	397	LE25E12	-703	LE4D06	106	LE33G20	-940	LE13J08	-366
	LE32B05	920	LE4D06	106	LE8A19	206	LE6D12	-166	LE7L24	195	LE18O22	506
	LE10J17	-280	LE10C22	-265	LE9D08	245	LE26N21	-762	LE22K20	616	LE9I20	241
	LE32D10	914	LE16M01	-440	LE5I22	126	LE27C02	769	LE3H15	83	LE12A12	-322
	LE4K23	94	LE5A24	-122	LE10M06	271	LE20I15	-554	LE13F06	363	LE20K24	562
	LE15E23	-413	LE27B06	781	LE3A07	-57	LE29L05	845	LE2C23	-31	LE14J14	399
	LE9D08	245	LE26N21	-762	LE15D09	428	LE18K23	496	LE29J18	840	LE18K23	496
	LE17D13	482	LE13M10	361	LE15L08	424	LE25G03	-693	LE17H01	-485	LE2C24	39
	LE17H04	479	LE25B15	-721	LE21G10	585	LE4C09	91	LE11M23	286	LE30M01	854
	LE28A03	799	LE6C03	-150	LE7N03	-204	LE30M01	854	LE14J14	399	LE20K08	560
	LE7E22	-187	LE16D08	450	LE8A19	206	LE15I14	-420	LE28L12	814	LE26N21	762
	LE12A21	-314	LE17H04	479	LE21P10	-599	LE27C02	769	LE11F03	304	LE13C15	-346
	LE6H16	-169	LE30I22	-858	LE23E11	629	LE8A19	206	LE9D08	245	LE14M14	-395
	LE14A11	379	LE9I20	241	LE27C02	769	LE6N14	-170	LE8A19	206	LE14G11	-384
	LE4K23	94	LE22M24	-618	LE18O22	506	LE13F23	373	LE8A19	206	LE9I20	-241
	LE11B13	300	LE25H18	-713	LE13F06	363	LE17F05	484	LE33H21	956	LE16B20	448
	LE12O13	319	LE25M06	710	LE27C02	769	LE7H09	200	LE23K03	632	LE33G20	-940
	LE20O17	-555	LE10P06	-276	LE27C02	769	LE13G13	-347	LE4E16	98	LE13K23	349
	LE16O12	-446	LE10P06	-276	LE27O11	768	LE33E05	932	LE27F04	783	LE18O22	506
	LE31H21	-895	LE4K23	94	LE16B20	448	LE30M01	854	LE12J19	338	LE22C15	610
	LE12P18	-335	LE4K23	94	LE19N09	-547	LE30M01	854	LE16P01	462	LE6O06	162
	LE24L10	-674	LE27J03	-793	LE27C02	769	LE2K22	-43	LE12E14	-325	LE27F04	-783
	LE31P23	-897	LE6E22	-159	LE8A19	206	LE33G22	941	LE15L08	424	LE3N10	74
	LE26E09	738	LE10M13	262	LE8A19	206	LE25C11	687	LE6H08	168	LE4E16	98
	LE11F03	-304	LE9M18	-244	LE27C02	769	LE26E20	-744	LE28L05	820	LE9E10	238
	LE14B20	396	LE9F04	-246	LE18K23	496	LE6A06	-156	LE14G11	-384	LE12P11	342
	LE4K23	94	LE31A11	-877	LE24B21	681	LE20C03	551	LE27F04	783	LE13F06	363
	LE20H18	-568	LE25N18	-719	LE18K23	496	LE28G20	805	LE3H15	83	LE12M01	-318
	LE14M13	388	LE12P11	342	LE8A19	206	LE31D04	890	LE20I03	-553	LE12F05	-337
	LE12P11	342	LE4K06	-102	LE32B03	-919	LE27C02	769	LE7K12	193	LE2C24	39
	LE21K07	577	LE10P06	-276	LE31K16	-887	LE13F06	363	LE24I20	665	LE6M05	154
	LE19D04	538	LE18M13	-497	LE18A23	-491	LE13F06	363	LE29L05	845	LE18A23	-491
	LE32D10	914	LE18F04	-510	LE8A19	206	LE13L14	-369	LE7D01	-198	LE1B05	25
	LE15L08	424	LE30P19	875	LE6H09	-174	LE23M14	643	LE29O17	-830	LE4C09	91
	LE21B20	-592	LE2O19	36	LE33E01	-931	LE30M01	854	LE4D06	106	LE18C20	500
	LE12P11	342	LE21P16	-600	LE26E09	-738	LE30M01	854	LE8A19	206	LE14L20	400
	LE10C22	-265	LE25E08	-702	LE31I24	-886	LE27C02	769	LE10C22	-265	LE20I03	-553
	LE3C14	-64	LE27C24	-771	LE11B05	-299	LE15E23	413	LE11F03	304	LE29C10	-831
	LE13J08	-366	LE6H16	-169	LE2A05	-30	LE30M01	854	LE24H22	673	LE15D07	427
	LE13C03	-345	LE19D04	538	LE15D07	427	LE5P17	148	LE8A19	206	LE13L14	-369
	LE14P10	-401	LE8A24	-213	LE31H21	-895	LE15L08	424	LE15D07	427	LE29L11	-846
	LE30E17	-851	LE15D09	-428	LE17D17	483	LE16D20	451	LE9N05	-256	LE29L05	845
	LE8A08	212	LE17B07	-481	LE23C14	639	LE30M01	854	LE29L05	845	LE4K23	94
	LE31A11	-877	LE19D04	538	LE30M01	854	LE7L24	195	LE24K14	-666	LE14J14	399
	LE13J08	-366	LE10G13	-261	LE18K23	496	LE18B07	-515	LE19C21	522	LE6P11	178
	LE19D04	538	LE8A08	-212	LE2K11	34	LE27C02	769	LE4E16	98	LE28G20	805
	LE26A11	735	LE9E08	-237	LE10D07	-278	LE27C02	769	LE3L07	86	LE14M14	-395
	LE11B16	-293	LE11F03	-304	LE8A19	206	LE28J07	-819	LE21J01	604	LE6O06	162
	LE6E22	-159	LE5F02	-131	LE8A19	206	LE17D17	-483	LE28L05	-820	LE33C06	-938
	LE12E14	325	LE31C19	880	LE8A19	206	LE23K13	-633	LE14M13	-388	LE30P05	-874
	LE11F03	-304	LE30M01	-854	LE8G20	216	LE5P17	148	LE3H15	83	LE2N21	-56
	LE4M17	95	LE19N09	-547	LE1G11	2	LE19K04	536	LE8A19	206	LE12C23	316
	LE11P03	-312	LE28H24	813	LE30M01	854	LE6H11	175	LE1J04	-18	LE14J14	399
	LE12O13	319	LE14B20	396	LE4E16	98	LE12M01	318	LE30I22	858	LE31D04	890
	LE14G22	-393	LE14J12	-398	LE8A19	206	LE4K06	-102	LE2B22	-45	LE20I03	-553
	LE15H16	422	LE18P06	513	LE27C02	769	LE16D21	459	LE9F04	-246	LE14J14	399
	LE17H04	479	LE12J19	-338	LE28K08	-808	LE27C02	769	LE3H15	83	LE18D05	-516
	LE13K23	349	LE22K20	616	LE10C07	260	LE22K20	616	LE8A08	-212	LE9D08	245
	LE6H09	-174	LE23M14	643	LE18B07	515	LE13E20	355	LE3H15	83	LE4C09	-91
	LE28A03	799	LE31I21	-881	LE21J01	604	LE6M05	154	LE11N11	309	LE9A08	233
	LE28B13	-817	LE26A05	-733	LE18M21	499	LE30M01	854	LE10D01	277	LE22K20	616
	LE32A17	899	LE10P06	-276	LE29L11	-846	LE9E04	-236	LE24K15	-659	LE17H05	486
	LE11P03	-312	LE29M08	-834	LE20A19	549	LE27C02	769	LE16J12	454	LE29J02	838
	LE28B13	-817	LE3N10	74	LE15L08	424	LE27F11	789	LE13F20	364	LE6H02	167
	LE6E22	-159	LE3P14	-78	LE3P14	78	LE23N08	647	LE1H12	-16	LE23K03	632
	LE21B20	-592	LE26H11	-758	LE20N03	-572	LE13F06	363	LE29L11	846	LE14M14	-395
	LE30K12	859	LE15D07	427	LE10A11	-259	LE30M01	854	LE4E16	98	LE14L20	400
	LE24L10	-674	LE23C06	-638	LE14B20	396	LE13L10	368	LE10A16	-264	LE4E16	98
	LE11M23	-286	LE17I11	466	LE26H11	758	LE22K20	616	LE18E13	-492	LE14J14	399
	LE17I11	466	LE3D13	-81	LE8A19	206	LE19K04	536	LE4D06	-106	LE4E16	98
	LE6B08	-165	LE19D04	538	LE26M09	741	LE31D04	890	LE15D07	427	LE4N07	-114
	LE13C24	354	LE9A21	-227	LE18J03	518	LE10M06	271	LE1I11	-4	LE4E16	98
	LE19D04	538	LE26B11	-755	LE8A19	206	LE19C21	522	LE12C13	315	LE26E09	-738
	LE13M10	-361	LE32K06	910	LE13F20	364	LE13G16	-359	LE21B08	591	LE12J19	-338
	LE11F03	-304	LE3P14	-78	LE30M01	854	LE29I21	-826	LE14M13	-388	LE30L15	-873
	LE11F03	-304	LE32D15	-922	LE22K20	616	LE12P18	335	LE16D08	450	LE6G08	160
	LE29H16	-837	LE2H02	-48	LE32A17	-899	LE29K24	833	LE28L05	820	LE21N13	608
	LE21B20	-592	LE32D10	-914	LE19I21	-526	LE18F22	511	LE24P06	-677	LE3H15	83
	LE26N09	-760	LE14G22	-393	LE30O02	860	LE30M01	854	LE12J19	338	LE18D24	509
	LE28K14	-809	LE27F15	790	LE6O06	162	LE15D07	427	LE9E04	-236	LE21G08	584
	LE14B20	396	LE13L10	368	LE15G13	414	LE18F22	511	LE26M09	741	LE31D04	890
	LE25H13	-727	LE33A03	928	LE30M01	854	LE14I09	385	LE14J14	399	LE32B03	-919
	LE16G07	-437	LE21B20	-592	LE11N11	-309	LE28L05	820	LE1B05	25	LE23F05	-650
	LE3C14	-64	LE13L14	-369	LE27C02	769	LE23E23	-631	LE28A14	802	LE12J19	-338
	LE31H21	-895	LE1L09	28	LE21G08	584	LE15G13	-414	LE8A19	206	LE22N03	-626
	LE31M07	-882	LE24L10	-674	LE8A19	206	LE11E23	-284	LE15L08	424	LE25G03	-693
	LE31N03	896	LE14D10	397	LE28B20	-812	LE29L05	845	LE19J02	-541	LE3H15	83
	LE19D04	538	LE19C20	-529	LE19G14	-532	LE27C02	769	LE11B13	300	LE8C13	-208
	LE19K01	-527	LE3C14	-64	LE26E09	-738	LE27C02	769	LE3A07	-57	LE29L05	845
	LE23K13	-633	LE10C22	-265	LE12P18	335	LE8A19	206	LE27I24	774	LE13J08	-366
	LE33B09	-953	LE11F03	-304	LE8A19	206	LE16C03	436	LE3H15	83	LE28B20	812
	LE18F04	-510	LE28G20	805	LE21K18	-587	LE30M01	854	LE19E04	-530	LE30E01	850
	LE12E24	-326	LE4J06	-109	LE30M01	854	LE11D01	-301	LE1G11	2	LE13F23	373
	LE4K23	94	LE25C11	-687	LE5J09	-142	LE8A19	206	LE31H21	-895	LE15L08	424
	LE11F03	-304	LE31I24	-886	LE5L02	134	LE8A19	206	LE14J14	399	LE11N14	-298
	LE30O14	-861	LE14D10	397	LE19C21	522	LE6P11	178	LE3H15	83	LE20D08	564
	LE33M04	-945	LE6E22	-159	LE4E16	98	LE14I19	386	LE20I03	553	LE24H22	673
	LE9C07	-229	LE27M16	777	LE30F05	869	LE30M01	854	LE4E16	98	LE5L13	-146
	LE25P19	-732	LE26A05	-733	LE8A19	206	LE14G11	-384	LE11D01	301	LE29K24	833
	LE11F05	-305	LE6H16	-169	LE15I14	-420	LE7N03	204	LE20E08	-557	LE15D07	427
	LE9F15	-254	LE29H16	-837	LE30P19	875	LE12J19	338	LE25J17	729	LE6C12	158
	LE18M13	-497	LE13G13	347	LE8A19	206	LE18K23	496	LE20I03	-553	LE26N21	-762
	LE19M21	528	LE16F13	-460	LE31D04	890	LE1G11	2	LE11N14	-298	LE15D07	427
	LE31N03	-896	LE10C22	-265	LE12C13	-315	LE27C02	769	LE28I20	-806	LE14M13	-388
	LE6E22	-159	LE25I05	-698	LE31A11	-877	LE27C02	769	LE25M02	709	LE13F06	363
	LE12A10	-321	LE15D07	-427	LE2B22	-45	LE8A19	206	LE7I10	-191	LE14M13	-388
	LE26N14	-751	LE1H12	16	LE21J01	604	LE3D05	80	LE1B07	26	LE27P15	798
	LE14G22	-393	LE5M10	-128	LE17M21	468	LE4E16	98	LE11D13	-302	LE13C03	-345
	LE24K20	-667	LE4G17	-93	LE27C02	769	LE21P16	-600	LE3H15	83	LE2D19	-49
	LE17K22	-474	LE19D04	538	LE8A19	206	LE7H09	-200	LE6H09	-174	LE23M14	643
	LE30O16	-862	LE9E04	236	LE5M10	-128	LE8A19	206	LE5M13	-121	LE15J03	-431
	LE25J17	729	LE12P11	-342	LE12J19	338	LE21F14	594	LE14J14	399	LE11P21	313
	LE8H10	222	LE11H19	-308	LE20H18	-568	LE8A19	206	LE25J17	729	LE8E05	-211
	LE3E07	-58	LE1H20	17	LE23N08	-647	LE8A19	206	LE11B05	-299	LE15E23	413
	LE8A08	-212	LE9D08	245	LE22K20	616	LE9I20	241	LE17M21	468	LE4E16	98
	LE12J19	-338	LE15E19	-412	LE27C02	769	LE12J04	-332	LE14J14	399	LE28H01	-818
	LE27F11	-789	LE11F03	-304	LE30M01	854	LE4E16	98	LE24H16	-672	LE3L23	88
	LE19G16	-533	LE6H16	-169	LE8A19	206	LE25D09	-723	LE25G09	695	LE15D07	427
	LE18J22	-512	LE1G15	-3	LE13L23	-374	LE18K23	496	LE30P05	874	LE15D07	427
	LE9A08	233	LE15E23	413	LE22K20	616	LE5J09	-142	LE31I21	881	LE15L08	424
	LE33J18	-951	LE3N10	74	LE19I14	535	LE30M01	854	LE16F13	-460	LE16B11	-457
	LE14G07	383	LE25C17	-688	LE17D13	482	LE8A08	-212	LE19F15	545	LE8A19	206
	LE6E22	-159	LE1G11	-2	LE15G13	-414	LE23M07	635	LE9M18	244	LE15D07	427
	LE5L22	-136	LE14G07	383	LE4E16	98	LE13K23	349	LE16A13	-435	LE20I03	-553
	LE10P06	-276	LE27N10	788	LE20I03	553	LE31C07	-879	LE24G08	-663	LE13C03	-345
	LE30E17	-851	LE5C21	-116	LE8A19	206	LE5H10	-132	LE7E22	-187	LE16D08	450
	LE11P03	-312	LE26I14	-745	LE12A12	-322	LE8A19	206	LE28B20	-812	LE29L05	845
	LE32J15	-925	LE19D04	538	LE22K20	616	LE26H11	-758	LE18B07	515	LE31M07	-882
	LE26A05	-733	LE4B21	-113	LE11D01	301	LE29K24	833	LE12O13	-319	LE21P16	-600
	LE26N13	-761	LE7K13	180	LE22K20	616	LE11E06	-288	LE15L08	-424	LE25N18	-719
	LE15E19	-412	LE27L21	795	LE21P10	599	LE8A19	206	LE21M07	579	LE12M01	318
	LE11A10	287	LE17H01	-485	LE33L13	958	LE5F02	-131	LE30K12	859	LE15D07	427
	LE22K20	-616	LE19D04	538	LE11B16	-293	LE8A19	206	LE3O23	-63	LE29L05	845
	LE16L04	455	LE21N10	-598	LE16D06	449	LE8A19	206	LE5G10	-125	LE14J14	399
	LE1G11	-2	LE16C03	-436	LE30M01	854	LE12C23	316	LE26P06	-753	LE30F08	-863
	LE22M19	-613	LE11F03	-304	LE12A10	321	LE13F06	363	LE8A19	206	LE2E10	41
	LE19M21	528	LE13A20	-352	LE30M01	854	LE25E13	-691	LE23D06	644	LE8A19	206
	LE20C03	-551	LE24K20	-667	LE11C07	282	LE8A19	206	LE32D15	922	LE14J14	399
	LE23K24	-642	LE11F03	-304	LE12P11	342	LE29E13	822	LE26J07	759	LE6M11	155
	LE6E22	-159	LE9K05	-231	LE8A19	206	LE15E19	-412	LE25B07	720	LE14J14	399
	LE6P11	-178	LE33M19	-937	LE2F02	-47	LE18F22	511	LE1L08	-21	LE20I03	-553
	LE33A03	-928	LE6E22	-159	LE11M23	286	LE30M01	854	LE25E08	702	LE16G02	443
	LE7I20	-192	LE11B13	-300	LE27C02	769	LE30P05	-874	LE29L05	-845	LE16D08	450
	LE24L10	674	LE26D12	-746	LE29K24	833	LE3D05	-80	LE4O15	-96	LE14J14	399
	LE6E22	-159	LE16O12	-446	LE8A19	206	LE12C23	316	LE29K24	833	LE30O02	860
	LE27P11	-797	LE4I18	-100	LE26F13	-756	LE27C02	769	LE10O22	274	LE23N08	647
	LE7K13	180	LE29L05	-845	LE6C10	-157	LE18K17	495	LE33J10	950	LE10D07	278
	LE11F03	-304	LE8J14	-223	LE5A24	-122	LE18K23	496	LE15D07	427	LE21M20	-588
	LE1K21	6	LE17B07	481	LE7D01	-198	LE27C02	769	LE4M10	-104	LE15D07	427
	LE19G02	-531	LE7H17	201	LE25D23	-725	LE31M07	-882	LE4K23	94	LE14J14	399
	LE11K19	-285	LE12A10	-321	LE7N03	204	LE20I03	553	LE13A13	344	LE4C09	91
	LE29P24	-842	LE15E19	-412	LE29L05	845	LE18O22	506	LE8C13	208	LE8A19	206
	LE26F02	-747	LE25M06	-710	LE12J19	338	LE14M13	388	LE14J14	399	LE13K23	349
	LE12C13	-315	LE16L04	455	LE6M05	154	LE6H16	169	LE14J14	399	LE6H08	168
	LE11D01	301	LE5E12	123	LE12J19	338	LE18D24	509	LE13F20	364	LE29L11	-846
	LE25E12	703	LE15D07	427	LE17K05	467	LE27C02	769	LE10O10	-272	LE27J01	-792
	LE6E22	-159	LE24P24	-679	LE8A19	206	LE18F15	-517	LE13J08	-366	LE13L04	-367
	LE21B20	-592	LE12N03	-341	LE28L05	820	LE9E10	238	LE20I03	-553	LE12J04	-332
	LE9D08	245	LE14M14	-395	LE13F06	363	LE27D24	782	LE15L08	424	LE11F11	-306
	LE25N18	-719	LE24H01	-684	LE14P14	402	LE13A13	344	LE15D07	427	LE24P24	679
	LE30G05	-852	LE1K21	-6	LE2O19	-36	LE22K20	616	LE13J08	-366	LE24I15	-658
	LE21G01	-575	LE3N10	74	LE28A14	802	LE12J19	-338	LE20I03	-553	LE19L21	-546
	LE20O17	-555	LE6E22	-159	LE17D06	476	LE24P16	678	LE28E12	804	LE14J14	399
	LE29M21	-828	LE19D04	538	LE14J03	405	LE26N21	-762	LE25J17	729	LE12P11	-342
	LE27H15	-791	LE3N10	74	LE27C02	769	LE28H01	-818	LE20I03	-553	LE7G16	-189
	LE11P03	-312	LE21B08	-591	LE9A14	-234	LE4E16	98	LE20I03	-553	LE21A16	-582
	LE6E22	-159	LE23L17	-654	LE9D08	245	LE20N03	-572	LE18D24	509	LE13K23	349
	LE17H05	-486	LE25M06	-710	LE9N05	-256	LE29L05	845	LE14J14	399	LE24M10	-668
	LE11H20	-296	LE17H04	-479	LE31K16	-887	LE29L05	845	LE12P18	335	LE14J14	399
	LE12N03	-341	LE19M21	528	LE8H10	-222	LE30M01	854	LE14J14	399	LE29C10	831
	LE20C03	-551	LE11F03	-304	LE15D07	-427	LE8A19	206	LE14M13	-388	LE23C14	-639
	LE24L10	-674	LE1P09	-29	LE18F22	511	LE1B05	-25	LE13J08	-366	LE6H16	-169
	LE6E22	-159	LE12E08	-324	LE30K12	859	LE8A19	206	LE15D07	427	LE26J07	759
	LE19E04	-530	LE6E22	-159	LE19I21	-526	LE4E16	98	LE23M14	643	LE24H22	673
	LE3L07	86	LE15F07	-430	LE30I06	-857	LE8A19	206	LE8A19	206	LE30I06	857
	LE7K13	180	LE15D09	-428	LE19G14	532	LE29L05	845	LE13E20	-355	LE22M24	-618
	LE10D01	-277	LE29H16	-837	LE26I01	-739	LE8A19	206	LE9K02	-242	LE13J08	-366
	LE20E08	-557	LE6E22	-159	LE1C17	-1	LE29K24	833	LE14J14	399	LE32N21	927
	LE15N24	426	LE21O01	-580	LE3L15	-87	LE22K20	616	LE12A12	-322	LE8A19	206
	LE30B07	-866	LE13G13	347	LE3M18	69	LE13M10	-361	LE20I03	-553	LE24D10	-670
	LE13J08	-366	LE27E06	-772	LE8A19	206	LE9I20	-241	LE32C12	904	LE6P11	178
	LE21M07	-579	LE14P10	-401	LE5F02	131	LE15L08	424	LE19I12	-534	LE20I03	-553
	LE28K06	-807	LE27J08	-786	LE22H05	623	LE30M01	854	LE23D06	-644	LE11D13	-302
	LE6E22	-159	LE18F22	-511	LE4I18	100	LE19C21	522	LE31I24	-886	LE20I03	-553
	LE6E22	-159	LE21O22	-590	LE10A16	-264	LE4E16	98	LE17G02	471	LE29L05	845
	LE18M21	-499	LE14B20	396	LE10B06	275	LE21J01	604	LE14J14	399	LE24F03	-682
	LE22N03	-626	LE4E05	92	LE27C02	-769	LE17H05	486	LE20F06	-566	LE20I03	-553
	LE14B20	396	LE20L16	569	LE12E14	325	LE3H15	83	LE12I06	-327	LE20I03	-553
	LE1H08	-14	LE10D07	278	LE18K23	496	LE4C24	-97	LE33N12	952	LE8A08	212
	LE12I06	-327	LE6E22	-159	LE18G02	-501	LE13F06	363	LE30I06	-857	LE14M13	-388
	LE28I20	-806	LE33B09	-953	LE12A10	321	LE28A14	802	LE14J14	399	LE1G15	-3
	LE21M07	579	LE12M01	318	LE8A19	206	LE12M01	-318	LE18A23	-491	LE13F06	363
	LE6E22	-159	LE5E12	-123	LE29K24	833	LE26F13	756	LE29L11	-846	LE9E04	-236
	LE3D05	80	LE15D07	427	LE5P17	148	LE21F14	594	LE25E12	703	LE14J14	399
	LE21B20	-592	LE20I03	-553	LE19P07	-548	LE5N23	147	LE18P07	-521	LE14M13	-388
	LE26N09	-760	LE19D04	538	LE3M09	62	LE4D06	106	LE2C08	-38	LE20I03	-553
	LE11F03	-304	LE12J12	-333	LE9C11	230	LE30M01	854	LE27H08	-784	LE20I03	-553
	LE15P19	-433	LE22L17	-625	LE7L20	438	LE27C02	769	LE14J14	399	LE16D22	452
	LE3D16	-72	LE6E22	-159	LE21P16	-600	LE6E22	159	LE20I22	-559	LE4P04	112
	LE6E22	-159	LE30D23	-868	LE22K20	616	LE33M05	935	LE30P05	874	LE5C21	-116
	LE16F13	-460	LE16B11	-457	LE7N03	204	LE6G23	153	LE18F04	-510	LE13J08	-366
	LE21B20	-592	LE14B20	-396	LE8A19	206	LE12J19	-338	LE14M13	-388	LE17A06	-469
	LE25L02	-716	LE18G12	502	LE27C02	769	LE24F15	-683	LE22A15	609	LE8A19	206
	LE23J19	653	LE4N21	-115	LE8A19	206	LE13E24	-356	LE8A08	-212	LE7I08	-190
	LE10H23	279	LE12J19	338	LE22K20	616	LE21O12	589	LE15L08	424	LE21M07	579
	LE16K04	-444	LE18C20	-500	LE1I11	-4	LE4E16	98	LE15D07	427	LE1I11	4
	LE10P06	-276	LE13F23	-373	LE24B21	681	LE17H04	-479	LE3N24	-75	LE4E16	98
	LE18G12	-502	LE6E22	-159	LE21P16	-600	LE18B07	515	LE28L05	820	LE11P03	312
	LE6E22	-159	LE24B21	-681	LE4E16	98	LE5L13	-146	LE29K24	833	LE26P06	-753
	LE6H02	-167	LE6E22	-159	LE18B07	515	LE31M07	-882	LE27C24	771	LE29L05	845
	LE24E12	661	LE16M01	-440	LE30M09	855	LE18F22	511	LE14M13	-388	LE14D10	-397
	LE26I14	-745	LE6E22	-159	LE27F04	783	LE13F06	363	LE4E16	98	LE2A05	30
	LE14M13	-388	LE28N04	-815	LE4E16	98	LE2A05	30	LE6O06	162	LE7O15	182
	LE6P11	178	LE27G12	773	LE27C02	769	LE3A07	57	LE14M13	-388	LE26P02	-752
	LE19P02	-544	LE12J12	333	LE6C10	-157	LE8A19	206	LE15D07	427	LE23N08	-647
	LE20I03	-553	LE12F05	-337	LE4D06	-106	LE4E16	98	LE3G06	-66	LE14M13	-388
	LE27J08	-786	LE33C06	-938	LE32N22	-917	LE29K24	833	LE14J14	399	LE17M12	-475
	LE3M09	-62	LE21J17	-606	LE6M05	-154	LE22K20	616	LE32M02	-912	LE14J14	399
	LE12P11	342	LE6C12	158	LE29K24	833	LE5G10	-125	LE26D12	-746	LE1B05	25
	LE12A10	321	LE13F06	363	LE20I03	553	LE12J19	338	LE12C13	-315	LE27C02	769
	LE13C24	-354	LE18C20	-500	LE20F11	-570	LE29K24	833	LE26A11	-735	LE9K14	-243
	LE25I05	-698	LE5F02	-131	LE13F20	364	LE29L11	-846	LE30M09	855	LE29J02	838
	LE10J17	280	LE30E01	-850	LE29L11	846	LE14M14	-395	LE26H01	757	LE25A10	-700
	LE23J19	-653	LE29H16	-837	LE4E16	98	LE28G20	805	LE14P10	401	LE29L05	845
	LE12L13	-340	LE14P10	-401	LE8A19	206	LE32A13	-898	LE15D07	427	LE16D22	452
	LE25O04	-711	LE2K11	-34	LE18G02	501	LE29K24	833	LE3B16	71	LE33J04	-949
	LE9M18	-244	LE11P03	-312	LE26A09	734	LE25J17	729	LE13C03	345	LE15D07	427
	LE6E22	-159	LE8C01	-207	LE4D06	-106	LE29K24	833	LE17D13	482	LE13M10	361
	LE6E22	-159	LE4F10	-107	LE3N24	-75	LE4E16	98	LE9E10	238	LE16N07	461
	LE1G11	-2	LE7I20	-192	LE5E12	123	LE8G20	-216	LE8A19	206	LE18F15	-517
	LE25M06	-710	LE32E04	-906	LE8A19	206	LE26K09	-740	LE17D17	483	LE16D20	451
	LE15L08	424	LE3N10	74	LE20N03	-572	LE20D08	564	LE27E11	-765	LE14M13	-388
	LE7A04	-183	LE12O13	319	LE4B21	-113	LE29K24	833	LE14J14	399	LE27C08	-770
	LE15D07	427	LE14I04	-394	LE5L02	-134	LE22K20	616	LE29K24	833	LE26F13	756
	LE6H11	-175	LE8C21	-209	LE21N07	-607	LE29K24	833	LE26N09	-760	LE19D04	538
	LE10J17	280	LE15F07	-430	LE29K24	833	LE18K23	496	LE10M06	271	LE20I15	-554
	LE20C03	-551	LE2O19	36	LE29K24	833	LE29H16	-837	LE27J17	-794	LE15D07	427
	LE25G03	693	LE4C09	91	LE24K15	-659	LE17H05	486	LE32E19	-900	LE11D13	-302
	LE10B06	-275	LE6E22	-159	LE6C12	158	LE33L13	958	LE20I03	-553	LE25J10	-714
	LE5I07	-119	LE27M16	777	LE16D06	449	LE30M01	854	LE20I03	-553	LE33A03	-928
	LE18F04	-510	LE18G12	502	LE1I11	4	LE12J19	-338	LE14A11	379	LE15D07	427
	LE1K18	11	LE25C12	701	LE13K23	349	LE22K20	616	LE13L14	-369	LE9B13	253
	LE22B24	-620	LE14D10	397	LE8A08	-212	LE7I08	-190	LE29L05	-845	LE2D23	-50
	LE18K23	-496	LE16C04	442	LE7N03	204	LE28J07	-819	LE1L09	-28	LE20I03	-553
	LE12A10	-321	LE6D15	-172	LE1G11	2	LE2C24	39	LE14J14	399	LE6H08	-168
	LE18A23	-491	LE14B20	396	LE2K11	34	LE29K24	833	LE8A19	206	LE12M01	-318
	LE17G02	-471	LE12O13	319	LE28L05	820	LE21N13	608	LE24H01	-684	LE27F15	-790
	LE27C02	-769	LE11B13	-300	LE15D07	427	LE22L17	625	LE15L12	-425	LE9K14	-243
	LE4E05	92	LE20I22	-559	LE32C12	904	LE6P11	178	LE15D07	427	LE15D07	427
	LE26P06	-753	LE9E04	-236	LE29K24	833	LE26P06	-753	LE33L13	958	LE5F02	-131
	LE3P14	-78	LE6M05	-154	LE15G13	414	LE8A08	212	LE8A19	206	LE12J19	-338
	LE19M21	528	LE12A21	-314	LE29I13	-825	LE22K20	616	LE20K20	-561	LE15D07	427
	LE30E17	-851	LE33K09	-934	LE14B20	396	LE9F04	-246	LE1C17	-1	LE29K24	833
	LE26P06	-753	LE30F08	-863	LE14M13	388	LE12P11	342	LE3C14	-64	LE13L14	-369
	LE32C12	904	LE6P11	178	LE21G10	585	LE8A19	206	LE27O11	-768	LE12P11	342
	LE13L10	368	LE22K20	616	LE22K20	616	LE25E12	703	LE33J10	950	LE21O01	-580
	LE18J22	512	LE20C03	551	LE30F05	-869	LE16G02	443	LE5L02	-134	LE20I03	-553
	LE30J09	-871	LE2I09	32	LE5L22	-136	LE8A19	206	LE13C03	-345	LE19D04	538
	LE21J01	604	LE3D05	80	LE29P24	842	LE4J06	109	LE1I11	4	LE12J19	-338
	LE19N09	-547	LE29H16	-837	LE10H23	279	LE12J19	338	LE8G20	-216	LE6O14	-164
	LE9A08	-233	LE12A10	-321	LE31B20	889	LE8A19	206	LE29J10	-839	LE20I03	-553
	LE9H08	248	LE21I23	-576	LE30I22	858	LE31D04	890	LE4B21	-113	LE29K24	833
	LE19E04	-530	LE20I22	-559	LE28L05	820	LE11P03	312	LE33J10	950	LE25B15	-721
	LE25C12	-701	LE27M16	777	LE8A08	212	LE17B07	-481	LE16D08	-450	LE13J08	-366
	LE20F11	-570	LE6P11	-178	LE9D08	245	LE14M14	-395	LE7E18	186	LE15D07	427
	LE5L02	-134	LE27J03	-793	LE21M07	579	LE12M01	318	LE15D07	427	LE32I04	909
	LE8C21	-209	LE2E10	-41	LE21O01	-580	LE8A19	206	LE13J08	-366	LE9C22	-235
	LE10M06	271	LE20I15	-554	LE27E11	765	LE8A19	206	LE17D14	477	LE7I21	179
	LE25N18	-719	LE33B19	-954	LE25E08	702	LE16G02	443	LE13F23	-373	LE7N14	-196
	LE19C21	522	LE6P11	178	LE27C02	769	LE10M13	262	LE21K09	-578	LE15D07	427
	LE6P11	-178	LE23K13	-633	LE18K23	496	LE5F02	131	LE23D07	649	LE14J14	399
	LE30E17	-851	LE7K12	-193	LE3H15	83	LE33F14	947	LE15L08	424	LE19I14	-535
	LE4L04	-110	LE18E13	492	LE3M18	69	LE20N03	-572	LE9D08	245	LE20N03	-572
	LE20F11	-570	LE11D01	-301	LE26N14	-751	LE1H12	16	LE24G08	-663	LE33M05	935
	LE8A24	-213	LE11K19	-285	LE18M21	-499	LE14B20	396	LE27F11	-789	LE33J10	950
	LE10P06	-276	LE9A14	-234	LE25J17	729	LE12P11	-342	LE16D08	450	LE16C04	442
	LE27C02	-769	LE27B04	-780	LE12A10	321	LE19P07	-548	LE15I13	-416	LE15D07	427
	LE24K15	-659	LE26A05	-733	LE10B06	275	LE4I20	101	LE13F06	363	LE14J12	-398
	LE5A24	-122	LE33A03	928	LE3H15	83	LE28B20	812	LE8A19	206	LE3L23	88
	LE18C20	-500	LE6F07	-173	LE11D01	301	LE5E12	123	LE20F06	-566	LE30M01	854
	LE11K19	-285	LE1G15	-3	LE31C07	879	LE4C09	91	LE13J08	-366	LE30I22	-858
	LE11P03	-312	LE27K16	-775	LE20K08	-560	LE5F02	131	LE33J10	950	LE3D13	-81
	LE25C19	689	LE15D07	427	LE30I22	858	LE27J03	793	LE16G02	443	LE20I22	-559
	LE8B10	-220	LE30E17	-851	LE14A11	379	LE8A19	206	LE32A16	-903	LE14J14	399
	LE2F05	-52	LE8C21	-209	LE27P15	798	LE18D16	508	LE15D07	427	LE20C22	-556
	LE24O03	-660	LE13G13	347	LE16G02	443	LE5D08	130	LE33J04	-949	LE22M24	-618
	LE2F02	47	LE33E01	-931	LE6G23	-153	LE7N03	204	LE19I21	526	LE15L08	424
	LE19M21	528	LE21G01	-575	LE29K24	833	LE30O02	860	LE14P10	-401	LE16B03	-456
	LE18F04	-510	LE13A20	-352	LE15N24	426	LE2C24	39	LE10A16	-264	LE3E12	-65
	LE14D05	-403	LE20F06	-566	LE6H08	168	LE4E16	98	LE33K09	-934	LE20I03	-553
	LE19M21	528	LE30M09	855	LE8A08	-212	LE3H15	83	LE15D07	427	LE17I11	-466
	LE2O19	36	LE26N13	-761	LE3H15	83	LE12M01	-318	LE2C24	-39	LE20I03	-553
	LE12A10	-321	LE12O13	-319	LE29K24	833	LE21B08	591	LE20I03	-553	LE19I19	-525
	LE12L14	624	LE18C20	-500	LE26N14	-751	LE5F02	131	LE14J14	399	LE9F20	-247
	LE12E24	-326	LE21M07	-579	LE17B07	-481	LE25N18	719	LE30I06	-857	LE8A19	206
	LE30I06	857	LE26B11	755	LE30M01	854	LE17M12	475	LE15D07	427	LE14G07	-383
	LE18K23	-496	LE19M21	528	LE19I19	525	LE16G02	443	LE12E08	324	LE8A19	206
	LE15L08	-424	LE11B13	-300	LE31K20	-888	LE16G02	443	LE2C08	38	LE23D06	644
	LE30E17	-851	LE30I06	-857	LE24P06	-677	LE3H15	83	LE9L22	-250	LE13J08	-366
	LE23J03	-651	LE22E07	-611	LE31I21	881	LE15L08	424	LE17G02	471	LE15D07	427
	LE28H24	813	LE32D10	-914	LE12A10	321	LE11H20	-296	LE10C22	-265	LE27O11	-768
	LE15L08	424	LE19I14	-535	LE8A19	206	LE3L23	88	LE15D07	427	LE33M04	-945
	LE31N18	-892	LE18C20	-500	LE10C22	265	LE18F22	511	LE27E03	-764	LE15D07	427
	LE4L04	-110	LE4E05	92	LE24D10	-670	LE12J19	338	LE21I20	586	LE15D07	427
	LE23J18	645	LE12J16	-334	LE25J17	729	LE6C12	158	LE23L17	-654	LE17N03	488
	LE3P24	-79	LE32A13	-898	LE3H15	83	LE4C09	-91	LE13F20	364	LE22E07	-611
	LE29H16	-837	LE13P20	-371	LE12J19	-338	LE17D14	477	LE21B20	-592	LE20I03	-553
	LE2E08	-40	LE6M05	-154	LE3H15	83	LE18D05	-516	LE15J03	-431	LE3I05	-61
	LE4E05	92	LE14J14	-399	LE6P11	178	LE25B07	-720	LE32D10	-914	LE22M24	-618
	LE33A03	928	LE27J17	-794	LE3H15	83	LE2D19	-49	LE5L13	146	LE29P24	842
	LE1G11	-2	LE3M09	-62	LE30K11	-853	LE22K20	616	LE12J21	-339	LE13C24	354
	LE27P15	-798	LE7L24	195	LE25J17	729	LE8E05	-211	LE21O01	-580	LE8A19	206
	LE18J03	518	LE20E07	-552	LE5L13	-146	LE5E12	123	LE18K23	-496	LE23D06	644
	LE3O23	-63	LE29L05	845	LE26E20	744	LE2K01	-33	LE25D23	-725	LE31M07	-882
	LE8C13	-208	LE25M06	-710	LE2C24	39	LE27C15	763	LE22M19	-613	LE13J08	-366
	LE11K16	-290	LE11P03	-312	LE29D09	843	LE12J19	338	LE24B09	-680	LE13J08	-366
	LE24K15	-659	LE2O24	-44	LE27O11	-768	LE12P11	342	LE19J24	-543	LE15D07	427
	LE11H20	-296	LE10D07	278	LE3H15	83	LE20D08	564	LE29K01	-827	LE16F13	-460
	LE30F08	-863	LE21B20	-592	LE2C24	39	LE24H22	673	LE21G10	585	LE8A19	206
	LE27P11	-797	LE30E01	-850	LE24P24	679	LE6P11	178	LE14J14	399	LE23M07	-635
	LE17K20	-473	LE15D07	427	LE26B11	755	LE2C24	39	LE13J08	-366	LE12K22	-328
	LE18G12	-502	LE25E05	-690	LE14B20	396	LE27O11	-768	LE8A19	206	LE25E12	703
	LE9B09	-251	LE18C20	-500	LE30M01	854	LE11D21	-303	LE8A19	206	LE26K09	-740
	LE4M10	-104	LE25N18	-719	LE25G03	693	LE4C09	91	LE12C13	-315	LE6P11	-178
	LE25N18	-719	LE27F04	-783	LE29K24	833	LE14I09	385	LE30J13	872	LE18O22	506
	LE11B13	-300	LE11D13	-302	LE12J19	-338	LE3H15	83	LE10B06	275	LE4I20	101
	LE5K19	-120	LE25N18	-719	LE21B08	591	LE12J19	-338	LE3P14	78	LE23N08	647
	LE10E16	-267	LE33M19	-937	LE6O06	162	LE21N07	607	LE31K16	-887	LE29L05	845
	LE15D07	427	LE32I04	909	LE13F23	373	LE22L17	625	LE18P07	521	LE14J03	405
	LE24G08	663	LE26A05	-733	LE3H15	83	LE2N21	-56	LE18D24	509	LE14J14	399
	LE5I22	-126	LE14B20	396	LE1G11	2	LE14B20	396	LE21P10	599	LE8A19	206
	LE12A10	-321	LE21J03	-605	LE3H15	83	LE12A12	-322	LE7H17	-201	LE9F04	-246
	LE30E17	-851	LE28K19	-801	LE8A19	206	LE25E12	703	LE14D10	-397	LE13J08	-366
	LE27B04	-780	LE18E15	-493	LE22L17	625	LE15L08	424	LE20I03	-553	LE6M05	-154
	LE30E17	-851	LE23J05	-652	LE8A19	206	LE15J04	423	LE15L08	424	LE20A19	-549
	LE11F05	-305	LE33C11	-929	LE6O06	162	LE4A17	-90	LE17I11	-466	LE14M13	-388
	LE11B13	-300	LE24F16	-671	LE14B20	-396	LE3H15	83	LE5A24	-122	LE14M13	-388
	LE26H01	757	LE25A10	-700	LE13F20	364	LE33G09	933	LE4E16	98	LE14I19	386
	LE6M11	-155	LE6O06	-162	LE21M07	579	LE31C07	879	LE17K20	-473	LE15D07	427
	LE31O17	-883	LE30P19	-875	LE25G17	-696	LE5L22	136	LE3E12	65	LE18K23	496
	LE17D13	-482	LE28I20	-806	LE30F05	-869	LE5L22	136	LE13F20	364	LE33G09	933
	LE21N13	-608	LE26A05	-733	LE8A19	206	LE22N03	-626	LE1J04	18	LE18B07	515
	LE33H21	956	LE16B20	448	LE19I19	525	LE14B20	396	LE13J08	-366	LE25B07	-720
	LE15N24	-426	LE16C04	442	LE6O06	162	LE26N21	-762	LE33J10	950	LE25E08	-702
	LE21B20	-592	LE12B14	-329	LE12P11	342	LE3N24	75	LE19I12	-534	LE9K14	-243
	LE15D07	427	LE25G16	706	LE5L20	-135	LE14B20	396	LE15D07	427	LE30J09	-871
	LE21B20	-592	LE6G08	-160	LE6O06	162	LE27C02	-769	LE2F02	-47	LE15D07	427
	LE18J22	-512	LE28K19	-801	LE19J02	-541	LE3H15	83	LE30M01	854	LE11D21	-303
	LE13F20	364	LE6H02	167	LE33N12	952	LE8A08	212	LE8H10	-222	LE20I03	-553
	LE11N14	-298	LE15D07	427	LE12P11	342	LE21P16	-600	LE10M06	271	LE16N07	461
	LE27L21	795	LE28I20	-806	LE16G02	443	LE31M07	-882	LE23C04	-637	LE15D07	427
	LE3E12	-65	LE17F05	-484	LE12P11	342	LE26N14	-751	LE13J08	-366	LE23N05	-655
	LE12O13	319	LE14G22	-393	LE17B07	481	LE11L01	-957	LE22K20	-616	LE24P02	-676
	LE9C07	-229	LE27L21	795	LE24D10	670	LE1G11	2	LE18K23	-496	LE11F05	305
	LE3H15	83	LE33F14	947	LE2F02	47	LE33E01	-931	LE26E20	-744	LE14J14	399
	LE29L11	-846	LE18F22	-511	LE16P01	462	LE8A19	206	LE15L08	424	LE14P14	-402
	LE15E19	-412	LE14E03	-381	LE14G11	-384	LE12P11	342	LE8A19	206	LE19C21	522
	LE18C20	-500	LE6G08	-160	LE13F20	364	LE6H02	167	LE30M01	854	LE12C23	316
	LE4M17	-95	LE30E17	-851	LE25D21	724	LE2C24	39	LE13F06	363	LE18B07	515
	LE2O19	-36	LE4E05	92	LE14B20	396	LE14G07	-383	LE16F13	-460	LE30I06	-857
	LE11A10	287	LE31H21	-895	LE17H04	479	LE12J19	-338	LE12A10	321	LE11H20	-296
	LE18C20	-500	LE22G01	-612	LE15E19	412	LE12A10	321	LE8O22	-219	LE14M13	-388
	LE27L21	795	LE7D01	-198	LE2C24	39	LE16D22	452	LE17D13	482	LE8A08	-212
	LE9A08	-233	LE27P11	-797	LE6O06	162	LE6E22	159	LE13F06	363	LE4B21	113
	LE5M13	-121	LE11F03	-304	LE24F15	683	LE22L17	625	LE32O02	-913	LE7H09	-200
	LE1G22	-8	LE26A05	-733	LE13F06	363	LE14J12	-398	LE20I03	-553	LE1J04	-18
	LE25M06	-710	LE1H08	-14	LE25G09	-695	LE2C24	39	LE11D13	-302	LE11E06	-288
	LE23M14	643	LE24H22	673	LE17A06	469	LE2C24	39	LE19M21	528	LE16F13	-460
	LE30E17	-851	LE12E14	-325	LE18A23	-491	LE14B20	396	LE16N07	461	LE26M09	741
	LE11D01	301	LE29K24	833	LE31A11	-877	LE26P06	753	LE30F05	-869	LE16G02	443
	LE26N21	-762	LE11P03	-312	LE14B20	396	LE3L24	-73	LE3L23	88	LE17F05	-484
	LE14B20	396	LE26B11	-755	LE13C24	-354	LE2C24	39	LE11O10	291	LE4D06	106
	LE17B07	-481	LE25N18	719	LE2C24	39	LE6M11	-155	LE8A19	206	LE15E19	-412
	LE24K20	-667	LE32D15	-922	LE14B20	396	LE30D03	-867	LE16P01	462	LE6C10	-157
	LE26M09	741	LE31D04	890	LE2C24	39	LE4N21	-115	LE6P11	-178	LE33M19	-937
	LE21O23	-581	LE28I20	-806	LE2C24	39	LE33J04	-949	LE17K05	467	LE14J14	399
	LE20H18	-568	LE25G09	-695	LE6C10	-157	LE27H24	785	LE3L23	88	LE15H16	-422
	LE15D07	427	LE23N08	-647	LE28J07	819	LE22L17	625	LE27P15	-798	LE7L24	195
	LE8A19	-206	LE25A03	-686	LE8C13	208	LE8A19	206	LE31A13	878	LE3L23	88
	LE18C20	-500	LE16N07	-461	LE13E24	356	LE22L17	625	LE19D04	-538	LE13J08	-366
	LE24G08	663	LE23E09	-628	LE2C24	39	LE5I22	126	LE15L08	424	LE15I14	-420
	LE21O22	-590	LE25E05	-690	LE2C24	39	LE14M01	-387	LE9A08	233	LE15E23	413
	LE8A24	-213	LE32O02	-913	LE18O22	506	LE31I21	881	LE22M24	-618	LE25E08	-702
	LE16D08	450	LE16C04	442	LE1K08	-10	LE14B20	396	LE20I03	-553	LE29N13	-848
	LE4E16	98	LE13K23	349	LE5F02	131	LE20F11	570	LE29K24	833	LE21B08	591
	LE20F18	567	LE32D15	-922	LE9C22	235	LE2C24	39	LE16G02	443	LE31M07	-882
	LE21D21	-602	LE27C02	-769	LE2C24	39	LE33M04	-945	LE11K19	-285	LE20I22	-559
	LE21I20	586	LE15D07	427	LE32M02	-912	LE14B20	396	LE21G08	584	LE15G13	-414
	LE25G03	-693	LE3D16	-72	LE17H04	479	LE25B15	-721	LE13J08	-366	LE3L24	-73
	LE6O06	162	LE26N21	-762	LE14B20	396	LE27N13	-796	LE10O10	-272	LE13C03	-345
	LE10D07	278	LE18G02	-501	LE30P19	-875	LE2C24	39	LE20I15	-554	LE11F05	-305
	LE23D07	649	LE28I20	-806	LE8A19	206	LE3C14	64	LE15L08	424	LE17I11	-466
	LE31K16	-887	LE14E03	-381	LE14B20	396	LE20L16	569	LE28N24	-816	LE18J22	-512
	LE30K11	-853	LE15D09	428	LE32J15	-925	LE14B20	396	LE14A11	379	LE9I20	241
	LE9P17	-257	LE21B20	-592	LE2C24	39	LE26C07	736	LE14I09	-385	LE15D07	427
	LE24F16	-671	LE23J03	-651	LE9E10	238	LE27P11	-797	LE13J08	-366	LE1J16	-20
	LE33J10	950	LE10D07	278	LE8A19	206	LE25A03	686	LE2B22	-45	LE8A19	206
	LE15L08	-424	LE18F04	-510	LE16P01	462	LE21P16	600	LE25E21	-692	LE14M13	-388
	LE32E20	-908	LE1K20	-12	LE31I21	881	LE18K23	496	LE29M08	834	LE14G22	393
	LE9G18	-239	LE4N21	-115	LE13F06	363	LE2D06	46	LE24I20	-665	LE29N13	848
	LE28A03	-799	LE4E05	92	LE4N21	-115	LE6O06	162	LE11E23	-284	LE20I03	-553
	LE14J12	-398	LE24M10	-668	LE11N13	-310	LE2C24	39	LE30M01	854	LE17M12	475
	LE27L21	795	LE1K24	-13	LE14B20	396	LE9A21	227	LE12J12	-333	LE20I03	-553
	LE17E17	-464	LE10J17	280	LE14J14	399	LE4E16	98	LE29L04	-841	LE10A16	-264
	LE22E07	-611	LE12J16	-334	LE12J19	-338	LE2C24	39	LE17G22	-472	LE20I03	-553
	LE30E17	-851	LE26M09	-741	LE12P11	342	LE4K06	-102	LE22M24	-618	LE16F13	-460
	LE4K08	-103	LE12A10	-321	LE22K20	616	LE24H16	672	LE2K11	34	LE29K24	833
	LE8P01	-225	LE3P24	-79	LE28L12	814	LE26N21	762	LE13J08	-366	LE5E20	-124
	LE21I20	-586	LE20F11	-570	LE6H11	-175	LE2C24	39	LE31I21	881	LE18K23	496
	LE9F15	-254	LE24C15	-656	LE14B20	396	LE25G07	-694	LE14M21	-389	LE13J08	-366
	LE26A05	-733	LE3P14	-78	LE23E19	630	LE2C24	39	LE13O15	-350	LE20I03	-553
	LE30E17	-851	LE11N13	-310	LE17B07	481	LE26F13	756	LE11P21	313	LE20I03	-553
	LE4N21	-115	LE14D05	-403	LE14B20	396	LE10C22	-265	LE17D06	476	LE24P16	678
	LE14B20	396	LE14G07	-383	LE8A19	206	LE30I06	857	LE6H08	-168	LE24P24	-679
	LE7K13	-180	LE14M14	-395	LE4D06	106	LE18C20	500	LE14E15	382	LE25B15	-721
	LE26C10	743	LE25N18	-719	LE2C24	39	LE6E19	152	LE29N13	848	LE20L16	-569
	LE12E14	-325	LE27F04	-783	LE7N14	-196	LE2C24	39	LE12A21	-314	LE20I03	-553
	LE29P24	-842	LE11N13	-310	LE30M01	854	LE5L22	136	LE14A11	379	LE8A19	206
	LE31O17	-883	LE27C02	-769	LE2C24	39	LE19H20	-540	LE26P06	-753	LE9E04	-236
	LE21C14	-583	LE3N24	-75	LE16P01	462	LE33J04	-949	LE5A24	-122	LE18K23	496
	LE15G13	-414	LE23M07	635	LE2C24	39	LE16A13	-435	LE30M01	854	LE7I21	179
	LE10G13	-261	LE23K10	-641	LE3E07	-58	LE1H20	17	LE12P11	342	LE6C12	158
	LE9M18	244	LE15D07	427	LE27C02	769	LE2K21	-35	LE21N07	-607	LE14M13	-388
	LE14E03	-381	LE1K08	10	LE31M07	-882	LE14B20	396	LE30M01	854	LE4E16	98
	LE22M19	-613	LE11P03	-312	LE2C24	-39	LE6P11	178	LE13J08	-366	LE32N22	-917
	LE31A11	-877	LE26P06	753	LE6H02	167	LE18D16	508	LE17F18	-478	LE22L17	625
	LE27B06	781	LE27G12	773	LE2K11	34	LE2C24	39	LE22M24	-618	LE33C13	-930
	LE24H01	-684	LE27F15	-790	LE22L17	625	LE24K20	-667	LE32C20	905	LE20I22	-559
	LE13F23	-373	LE7N14	-196	LE30M01	854	LE22C15	610	LE32N22	-917	LE29K24	833
	LE7L20	-438	LE15L08	424	LE19N09	-547	LE2C24	39	LE15L08	424	LE32O17	-902
	LE18C20	-500	LE1I24	-9	LE22L17	625	LE8O22	219	LE19G23	-524	LE13F06	363
	LE11N11	-309	LE28L05	820	LE14B20	396	LE21J01	604	LE29K24	833	LE5G10	-125
	LE11B13	-300	LE16K04	-444	LE2K11	34	LE22L17	625	LE15L08	424	LE30P19	875
	LE11P03	-312	LE3P08	-76	LE8A19	206	LE2E10	41	LE18G02	501	LE29K24	833
	LE23J18	-645	LE32F16	-915	LE14B20	396	LE26B11	-755	LE3M18	69	LE13M10	-361
	LE6E19	-152	LE21B20	-592	LE16P01	-462	LE2C24	39	LE27P15	798	LE1G11	2
	LE13L04	-367	LE16C04	442	LE2C24	39	LE2K22	-43	LE20F11	-570	LE29K24	833
	LE29I13	-825	LE18C20	-500	LE22L17	625	LE29I01	-823	LE29K24	833	LE18K23	496
	LE24C15	-656	LE17D13	-482	LE12C23	316	LE14M14	-395	LE8A19	206	LE16C03	436
	LE7K12	-193	LE21B20	-592	LE30A07	849	LE22L17	625	LE27N13	796	LE18K23	-496
	LE15I14	-420	LE11P03	-312	LE22L17	625	LE11N11	309	LE18J03	518	LE10M06	271
	LE19C21	-522	LE21B20	-592	LE5L22	136	LE13M10	361	LE18O22	-506	LE21K07	577
	LE21B20	-592	LE8I04	-217	LE27N13	796	LE18K23	-496	LE13J08	-366	LE4D06	-106
	LE11N21	-311	LE5L02	-134	LE12A21	-314	LE17H04	479	LE20I22	-559	LE13M10	361
	LE7K13	-180	LE33C11	-929	LE26J07	-759	LE14B20	396	LE19P02	-544	LE12J12	333
	LE33A03	928	LE32C12	-904	LE5I22	-126	LE14B20	396	LE29K24	833	LE29H16	-837
	LE29L05	845	LE18A23	-491	LE15G13	-414	LE6O06	162	LE15L08	-424	LE14G16	-392
	LE19C21	-522	LE1P09	-29	LE25N11	-731	LE2C24	39	LE1K24	-13	LE20I03	-553
	LE30E17	-851	LE9H08	-248	LE3H09	-82	LE22L17	625	LE20I03	-553	LE7I20	-192
	LE28K14	-809	LE7I20	-192	LE22L17	625	LE14E03	-381	LE20N03	-572	LE13F06	363
	LE8F06	221	LE12K22	-328	LE2C24	39	LE16D20	-451	LE13J08	-366	LE25A03	-686
	LE32K06	-910	LE30E17	-851	LE6M11	155	LE14B20	396	LE27P11	-797	LE12C13	-315
	LE10P06	-276	LE17M21	-468	LE16P01	462	LE30J13	872	LE25F07	-726	LE13J08	-366
	LE9H08	248	LE33I02	-942	LE1K18	-11	LE22L17	625	LE1G11	2	LE19K04	536
	LE32O02	-913	LE20F06	-566	LE21B08	591	LE6C10	-157	LE8I04	217	LE14E03	-381
	LE25M23	-699	LE26P06	-753	LE18P07	521	LE29J18	-840	LE25E12	703	LE15D07	427
	LE18E13	-492	LE30O16	-862	LE6C10	-157	LE31H03	894	LE27O11	768	LE33E05	932
	LE25J17	729	LE8E05	-211	LE18K23	-496	LE11F05	305	LE11M23	286	LE15L08	424
	LE21N10	-598	LE1G11	-2	LE3D16	72	LE6C10	157	LE18K23	-496	LE25G23	-697
	LE13F20	-364	LE3E12	-65	LE22L17	625	LE13G13	-347	LE19I19	525	LE16G02	443
	LE24P24	-679	LE24E24	-662	LE18P07	521	LE14J03	405	LE15A11	-408	LE13F06	363
	LE15D07	427	LE24P24	679	LE1B07	26	LE27P15	798	LE33J10	950	LE25C11	-687
	LE21B20	-592	LE9H08	-248	LE12P18	335	LE22L17	625	LE17P03	-490	LE11D13	-302
	LE33M04	-945	LE24C15	-656	LE22L17	625	LE31I24	886	LE14G07	383	LE25C17	-688
	LE7E18	-186	LE12J12	333	LE17H05	486	LE10O16	273	LE26E20	744	LE2K01	-33
	LE14J03	405	LE26N21	-762	LE14B20	396	LE3M09	62	LE7I21	179	LE16G02	443
	LE20D22	-565	LE14B20	-396	LE14B20	396	LE24D10	-670	LE15E11	-411	LE5I05	-118
	LE31B15	-893	LE10O22	-274	LE20E16	558	LE8A19	206	LE12J12	333	LE11C07	-282
	LE2N21	-56	LE21B20	-592	LE29K24	833	LE6O06	162	LE13J08	-366	LE21A17	-574
	LE30E17	-851	LE23L18	-646	LE29J10	839	LE22L17	625	LE2K22	-43	LE33J10	950
	LE25E05	-690	LE31D04	-890	LE22H05	-623	LE22L17	625	LE33J10	950	LE16D08	-450
	LE21F17	-603	LE3P24	-79	LE13I24	-360	LE22L17	625	LE18J22	-512	LE21M07	-579
	LE12P11	342	LE17L11	-487	LE22L17	625	LE18G12	502	LE33F10	-946	LE15L08	-424
	LE33J10	950	LE21O01	-580	LE22A15	609	LE8A19	206	LE3M09	62	LE4D06	106
	LE33J10	950	LE25B15	-721	LE16F13	460	LE6C10	-157	LE6C10	-157	LE8A19	206
	LE5L20	-135	LE14B20	396	LE31M07	-882	LE21O22	590	LE19L21	-546	LE15D07	427
	LE21B20	-592	LE28C20	-803	LE5L13	146	LE29P24	842	LE13J08	-366	LE32A13	-898
	LE21J10	595	LE25D21	-724	LE20E07	552	LE22L17	625	LE26I14	745	LE16N07	461
	LE30E17	-851	LE1K21	-6	LE14B20	396	LE23K13	633	LE6M11	155	LE28N04	-815
	LE6O14	-164	LE33C20	-939	LE26J07	759	LE6M11	155	LE6M11	-155	LE6O06	-162
	LE7E18	186	LE15D07	427	LE27E06	772	LE4D06	106	LE15D07	427	LE7M09	-181
	LE12J12	333	LE11C07	-282	LE23E12	640	LE29K24	833	LE12J12	333	LE1K08	10
	LE22K20	616	LE9I20	241	LE21J01	604	LE6O06	162	LE27J22	-787	LE24E24	-662
	LE27B04	-780	LE14P10	-401	LE18M21	499	LE22L17	625	LE20K20	561	LE4G22	-99
	LE24G08	-663	LE5M04	-127	LE2C24	39	LE21J01	604	LE29L11	846	LE13F06	363
	LE16J12	454	LE29J02	838	LE1J04	18	LE18B07	515	LE3E21	-60	LE14J14	399
	LE12O23	-320	LE6P11	-178	LE27J22	-787	LE14B20	396	LE24G08	-663	LE21N10	-598
	LE15P07	-432	LE11P03	-312	LE19C20	-529	LE22L17	625	LE5L22	-136	LE14G07	383
	LE2C23	-31	LE21B20	-592	LE2L05	-55	LE2C24	39	LE29L05	845	LE14I19	386
	LE8G20	-216	LE15B04	-421	LE14C15	380	LE22L17	625	LE14M13	-388	LE1I11	-4
	LE3P08	-76	LE33M19	-937	LE16N07	461	LE6J15	-177	LE26P06	-753	LE4N07	-114
	LE24G08	663	LE20F11	-570	LE22L17	625	LE4I18	-100	LE7E18	-186	LE12J12	333
	LE16F13	-460	LE30I06	-857	LE1J04	-18	LE14J14	399	LE2O24	-44	LE18K23	-496
	LE9M18	-244	LE16D20	-451	LE16P01	462	LE6C10	-157	LE21N07	-607	LE29K24	833
	LE15D07	427	LE14D15	404	LE3A07	57	LE29P24	-842	LE4D06	-106	LE29K24	833
	LE29I13	-825	LE14G07	383	LE10M06	271	LE16N07	461	LE18J22	-512	LE1D23	-27
	LE14B20	396	LE27O11	-768	LE22L17	625	LE29I21	-826	LE18K23	-496	LE19M21	528
	LE17M21	-468	LE32A17	899	LE12E08	324	LE8A19	206	LE18J22	-512	LE9K02	-242
	LE33E01	-931	LE25A10	700	LE17G02	-471	LE12O13	319	LE27C02	769	LE12J04	-332
	LE15D07	427	LE12J19	338	LE12E14	325	LE31C19	880	LE14J14	399	LE6E19	152
	LE31M07	-882	LE14B20	396	LE14J14	399	LE6H08	-168	LE30P05	874	LE8A19	206
	LE21F14	-594	LE13E24	-356	LE1K21	6	LE17B07	481	LE7N03	204	LE28J07	-819
	LE32N22	-917	LE27H24	-785	LE15C11	409	LE18P07	521	LE10O22	274	LE8A19	206
	LE15D07	427	LE4N07	-114	LE6H13	-176	LE5F02	131	LE30P19	875	LE32M02	912
	LE18F15	-517	LE27J08	-786	LE12P11	342	LE6C12	158	LE18O22	506	LE19K24	537
	LE24C15	-656	LE28J07	-819	LE9F04	-246	LE14J14	399	LE24E24	-662	LE20I03	-553
	LE27J22	-787	LE14B20	396	LE29L04	-841	LE22L17	625	LE27B06	781	LE17D17	-483
	LE18F15	-517	LE17H04	-479	LE7I20	192	LE10M06	271	LE18B07	515	LE13E20	355
	LE7L10	-194	LE12E24	-326	LE31D04	890	LE14J14	399	LE18O22	-506	LE2L05	55
	LE28A03	-799	LE14P10	-401	LE14J14	399	LE27B06	781	LE33J10	950	LE31A03	-876
	LE14E03	-381	LE5I22	-126	LE5M16	129	LE13F06	363	LE1G22	-8	LE17L11	-487
	LE1K24	-13	LE31O17	-883	LE14J14	399	LE11P21	313	LE18J22	-512	LE1G15	-3
	LE15D07	427	LE14G07	-383	LE24D10	670	LE9C11	-230	LE12P11	342	LE3N24	75
	LE18D24	-509	LE21B20	-592	LE8C23	210	LE5J23	144	LE8E05	211	LE12P11	-342
	LE31B15	-893	LE5B03	-138	LE30M01	854	LE7I21	179	LE25H13	-727	LE9J02	-249
	LE14E03	-381	LE20I03	-553	LE26J07	759	LE16P01	462	LE19P07	-548	LE5N23	147
	LE30E17	-851	LE17F18	-478	LE24D10	670	LE1B05	-25	LE27P11	-797	LE30E01	-850
	LE6O06	162	LE15D07	427	LE6P11	178	LE16G02	443	LE8A19	206	LE7H09	-200
	LE6C12	-158	LE22K20	-616	LE29J18	840	LE18K23	496	LE22M24	-618	LE21N13	-608
	LE33J10	950	LE3D13	-81	LE4I20	101	LE22L17	625	LE15D07	427	LE14I04	-394
	LE12B14	-329	LE3E12	-65	LE12P11	342	LE17L11	-487	LE15J03	-431	LE10M13	-262
	LE6M05	-154	LE3C14	-64	LE7A04	-183	LE12O13	319	LE8A19	206	LE26B11	755
	LE15H16	-422	LE14E03	-381	LE25M06	710	LE6C10	-157	LE13H22	-365	LE19I21	-526
	LE20F18	567	LE11F03	-304	LE33E01	-931	LE25A10	700	LE8C13	-208	LE27B06	781
	LE11H20	-296	LE32H01	-923	LE8A19	206	LE9F15	-254	LE17H05	486	LE10O16	273
	LE30K11	-853	LE12J12	333	LE9E10	238	LE16N07	461	LE8H10	222	LE8A19	206
	LE18C20	-500	LE24G08	-663	LE2C23	-31	LE14J14	399	LE22B22	-619	LE27J01	-792
	LE3E12	-65	LE22D04	-621	LE16P01	462	LE6O06	162	LE15C11	409	LE18P07	521
	LE7I20	-192	LE33L13	-958	LE16N07	461	LE26M09	741	LE14E03	-381	LE20I03	-553
	LE15D07	427	LE29L11	-846	LE17H01	-485	LE2C24	39	LE26A09	734	LE25J17	729
	LE27C08	-770	LE12K03	-317	LE7F05	199	LE14B20	396	LE33A03	-928	LE18J22	-512
	LE31B15	-893	LE9E08	-237	LE15B04	421	LE2C24	39	LE31C07	-879	LE16B03	-456
	LE1C17	-1	LE15L08	-424	LE7K12	193	LE2C24	39	LE13E24	356	LE27C02	769
	LE9G18	-239	LE8P01	-225	LE24K14	-666	LE14J14	399	LE19P02	544	LE24P02	-676
	LE10A11	-259	LE14M21	-389	LE14J14	399	LE32N21	927	LE3L23	88	LE14M01	-387
	LE3O23	-63	LE24G08	-663	LE14J14	399	LE23M07	-635	LE22D04	-621	LE29I21	-826
	LE19E04	-530	LE3P08	-76	LE18D24	509	LE14J14	399	LE5L22	-136	LE8A19	206
	LE21K09	-578	LE15D07	427	LE14J14	399	LE17M12	-475	LE14P14	402	LE3G06	-66
	LE12K22	-328	LE27C02	-769	LE23L18	-646	LE27F15	-790	LE2F01	-51	LE13J08	-366
	LE24I20	-665	LE18C20	-500	LE26I14	745	LE16N07	461	LE12C13	315	LE29K04	-832
	LE32C12	-904	LE26A05	-733	LE4K23	94	LE14J14	399	LE8A19	206	LE5H10	-132
	LE27J01	-792	LE8E05	-211	LE14B20	396	LE1J04	18	LE30O02	860	LE30M01	854
	LE15G13	414	LE8A08	212	LE17D14	477	LE7I21	179	LE13C03	-345	LE10I12	-268
	LE26A05	-733	LE17M12	-475	LE12O13	319	LE33G22	941	LE26E09	-738	LE27C02	769
	LE20I22	-559	LE14P10	-401	LE6C10	-157	LE18P07	521	LE7E18	-186	LE4O15	96
	LE30E17	-851	LE23N10	-648	LE18D05	516	LE2C24	39	LE8A19	206	LE15J04	423
	LE23J03	-651	LE3O14	-70	LE14J14	399	LE32B03	-919	LE8A19	206	LE25C11	687
	LE18F04	-510	LE33I24	-943	LE32A16	-903	LE14J14	399	LE14P14	402	LE13A13	344
	LE32O17	-902	LE6P11	-178	LE18E13	-492	LE14J14	399	LE20I03	-553	LE31K16	-887
	LE24G11	-657	LE21B20	-592	LE5G10	-125	LE14J14	399	LE18J22	-512	LE4E05	-92
	LE27N13	796	LE18K23	-496	LE14J14	399	LE6E19	152	LE31L12	-891	LE17L11	-487
	LE19E04	-530	LE8P01	-225	LE14J14	399	LE16D22	452	LE29M21	-828	LE19D04	538
	LE18F22	-511	LE21B20	-592	LE14J14	399	LE15J04	-423	LE30M01	854	LE11D01	-301
	LE13M10	-361	LE31O17	-883	LE14B20	396	LE13L04	367	LE28K08	-808	LE27C02	769
	LE27P11	-797	LE1D23	-27	LE14J14	399	LE20K08	560	LE20I22	-559	LE29I21	826
	LE15D07	427	LE1I11	4	LE32M02	-912	LE14J14	399	LE27J01	-792	LE26H01	-757
	LE7I20	-192	LE20K24	-562	LE9C11	230	LE5J23	144	LE31A10	884	LE13F06	-363
	LE9C03	-228	LE6B08	-165	LE17F18	-478	LE22L17	625	LE33C06	-938	LE19I12	-534
	LE33J10	950	LE31A03	-876	LE4O15	-96	LE14J14	399	LE13O15	-350	LE1P20	-24
	LE14N13	-406	LE14E03	-381	LE3E21	-60	LE14J14	399	LE5M10	-128	LE8A19	206
	LE2I14	-42	LE21B20	-592	LE14J14	399	LE1G15	-3	LE22M24	-618	LE7D01	-198
	LE15D07	427	LE13A20	-352	LE14J14	399	LE24F03	-682	LE15D07	427	LE7D01	198
	LE21B08	591	LE12J19	-338	LE21J03	-605	LE14J14	399	LE14J14	399	LE6C03	150
	LE15L08	424	LE20A19	-549	LE13F20	364	LE17P03	490	LE9B13	253	LE27B06	-781
	LE3C14	-64	LE9B09	-251	LE14J14	399	LE13K23	349	LE13F20	364	LE13G16	-359
	LE30P05	874	LE15D07	427	LE23D07	649	LE14J14	399	LE21G10	585	LE4C09	91
	LE32N22	-917	LE32E19	-900	LE25B07	720	LE14J14	399	LE33B09	-953	LE16J12	454
	LE30E17	-851	LE27J22	-787	LE12P18	335	LE14J14	399	LE12C13	315	LE17A06	-469
	LE25C12	-701	LE20D22	-565	LE14J14	399	LE28H01	-818	LE29K24	833	LE6O06	162
	LE4N21	-115	LE8A24	-213	LE14J14	399	LE27C08	-770	LE32D10	914	LE6M11	-155
	LE29L05	-845	LE16D08	450	LE32D15	922	LE14J14	399	LE6O12	-163	LE13J08	-366
	LE6P11	178	LE25B07	-720	LE30M01	854	LE33K09	934	LE25E12	-703	LE4D06	106
	LE14P10	-401	LE7N01	-203	LE14J14	399	LE24M10	-668	LE13L23	-374	LE18K23	496
	LE11F05	-305	LE19D24	-539	LE14J14	399	LE31I24	886	LE10M06	271	LE30M01	854
	LE27P11	-797	LE12C13	-315	LE22L17	625	LE12F05	337	LE8G20	-216	LE23L17	-654
	LE20F11	-570	LE19I21	-526	LE28N04	815	LE16N07	461	LE20N03	572	LE19I19	525
	LE14B20	396	LE27N13	-796	LE22L17	625	LE6O06	162	LE20I03	-553	LE29K01	-827
	LE3C14	-64	LE14P10	-401	LE31D19	-447	LE5J23	144	LE25M23	-699	LE26P06	-753
	LE7E22	-187	LE21F17	-603	LE7I21	179	LE16G02	443	LE13F23	-373	LE5P12	-137
	LE6P11	-178	LE18G02	-501	LE12J19	338	LE22C15	610	LE23N08	-647	LE8A19	206
	LE21L20	-597	LE31B15	-893	LE17K05	467	LE14J14	399	LE21D21	-602	LE9B13	253
	LE13A05	-343	LE5M10	-128	LE14J14	399	LE6H08	168	LE13F06	363	LE3M09	-62
	LE24F16	-671	LE21F17	-603	LE14J14	399	LE11N14	-298	LE14J14	399	LE15J04	-423
	LE31H21	-895	LE22G01	612	LE25E12	703	LE14J14	399	LE8G20	216	LE5P17	148
	LE21K07	-577	LE9G18	-239	LE26E20	-744	LE14J14	399	LE20I15	-554	LE4K08	-103
	LE11B13	-300	LE3L07	-86	LE33C13	930	LE13F06	363	LE22A15	609	LE6M05	154
	LE31B15	893	LE12O13	319	LE2C24	39	LE11H05	307	LE21O22	-590	LE15L08	-424
	LE2C24	39	LE27C15	763	LE5J23	144	LE31A10	884	LE23K03	632	LE25A03	-686
	LE6P11	-178	LE31L12	-891	LE27N10	-788	LE27F15	-790	LE15D07	-427	LE8A19	206
	LE18J22	-512	LE26N06	-749	LE27H15	791	LE22L17	625	LE8C13	-208	LE29L04	-841
	LE14B20	-396	LE3N24	-75	LE12O13	319	LE14B20	396	LE5J09	-142	LE8A19	206
	LE6G08	-160	LE5F02	-131	LE14J14	399	LE29C10	831	LE21I20	-586	LE20F11	-570
	LE30F05	-869	LE6P11	-178	LE19G23	-524	LE27F15	-790	LE26I01	-739	LE8A19	206
	LE12E08	-324	LE18J22	-512	LE10D01	277	LE22K20	616	LE22M06	-617	LE13C03	-345
	LE27J08	-786	LE31K16	-887	LE7G16	-189	LE27F15	-790	LE8A19	206	LE8O22	219
	LE15D07	427	LE20C22	-556	LE19F15	545	LE8A19	206	LE3O14	-70	LE13F06	363
	LE14B20	396	LE30D03	-867	LE27F15	-790	LE17J22	-480	LE13F06	363	LE2D06	46
	LE11C07	-282	LE15E19	-412	LE28E12	804	LE14J14	399	LE19G23	-524	LE16D20	-451
	LE6M05	-154	LE27J03	-793	LE5J23	144	LE8G20	-216	LE5L02	134	LE8A19	206
	LE11H19	-308	LE29J02	838	LE4N21	-115	LE27F15	-790	LE13J08	-366	LE18P14	-514
	LE1I11	4	LE12J19	-338	LE27F15	-790	LE32D10	-914	LE3C14	-64	LE27C24	-771
	LE25D23	-725	LE31M07	-882	LE27F15	-790	LE22H05	-623	LE20H18	-568	LE8A19	206
	LE28I20	-806	LE29O16	-835	LE22M19	-613	LE27F15	-790	LE26B11	-755	LE3B16	71
	LE30E17	-851	LE9F04	-246	LE2C24	39	LE2D06	46	LE15L08	424	LE29J02	-838
	LE1H12	-16	LE8C21	-209	LE14P15	-407	LE27F15	-790	LE17E17	-464	LE10J17	280
	LE11B13	-300	LE3P12	-77	LE14J14	399	LE7K12	193	LE30K12	859	LE8A19	206
	LE23M14	-643	LE10D07	278	LE27F15	-790	LE11C07	-282	LE8A19	206	LE6D12	-166
	LE33I24	-943	LE21J03	-605	LE14J14	399	LE9F20	-247	LE2O24	-44	LE11M23	-286
	LE26P02	-752	LE24H01	-684	LE24H01	-684	LE27F15	-790	LE12E14	-325	LE21M07	-579
	LE33H12	-948	LE24L10	-674	LE8E05	211	LE12P11	-342	LE15G13	414	LE8A08	212
	LE22L17	-625	LE28H24	813	LE1J16	20	LE25N18	-719	LE29I07	824	LE8A19	206
	LE7N14	-196	LE21O23	-581	LE26J07	759	LE5J23	144	LE12C13	315	LE20D22	-565
	LE21O23	-581	LE25J18	-715	LE18G18	503	LE15F07	-430	LE12D03	-336	LE22M24	-618
	LE22B22	-619	LE27J01	-792	LE27B04	780	LE21B09	-601	LE22M24	-618	LE29K01	-827
	LE13M10	-361	LE8P01	-225	LE23L17	-654	LE17N03	488	LE12P11	342	LE26N14	-751
	LE6P11	-178	LE21O12	-589	LE14I09	385	LE23E07	627	LE14C15	-380	LE15L08	-424
	LE3O14	-70	LE9C07	-229	LE4E16	98	LE5L09	145	LE13L04	-367	LE7F05	199
	LE6M05	-154	LE7N03	-204	LE12O13	319	LE25M06	710	LE20N03	-572	LE20D08	564
	LE32A17	-899	LE14E03	-381	LE13F23	-373	LE18G18	503	LE3M18	69	LE20N03	-572
	LE31I21	-881	LE14P10	-401	LE23N08	647	LE5L09	145	LE28O04	810	LE27C02	769
	LE3L07	-86	LE22D04	-621	LE30B07	-866	LE13G13	347	LE33G20	-940	LE32K06	910
	LE27C02	-769	LE18M21	-499	LE7E22	-187	LE21L16	-596	LE13J08	-366	LE12E08	-324
	LE29M08	-834	LE7E22	-187	LE21J10	595	LE25D21	-724	LE8A19	206	LE4K06	-102
	LE18C20	-500	LE13B05	372	LE19J02	541	LE25N18	-719	LE5J23	-144	LE13J08	-366
	LE13A05	-343	LE22K20	-616	LE14J14	399	LE6C03	150	LE8A19	206	LE25D09	-723
	LE30E01	-850	LE30E17	-851	LE7E22	-187	LE16D08	450	LE5L22	136	LE13M10	361
	LE8A24	-213	LE17J22	-480	LE26N06	749	LE5J23	144	LE11C07	282	LE8A19	206
	LE3E12	-65	LE9P23	-258	LE15L08	424	LE13L14	369	LE3E12	-65	LE33M04	945
	LE11P03	-312	LE19G16	-533	LE24O03	-660	LE13G13	347	LE18J22	-512	LE30G05	-852
	LE15L08	424	LE17I11	-466	LE32I04	-909	LE2C23	31	LE15G13	-414	LE13J08	-366
	LE1P09	-29	LE31O17	-883	LE16B11	457	LE11N21	311	LE12P11	342	LE21P16	-600
	LE14B20	396	LE24D10	-670	LE13C03	-345	LE19D04	538	LE12C23	-316	LE33M05	935
	LE21O23	-581	LE13C24	-354	LE18G18	503	LE29M21	-828	LE1K24	-13	LE16B03	-456
	LE1K08	-10	LE14B20	396	LE18J22	512	LE20C03	551	LE31I24	886	LE15D07	427
	LE15D07	427	LE15D07	427	LE1L09	28	LE3I05	-61	LE8A19	206	LE25A03	686
	LE26H01	-757	LE14P10	-401	LE33B09	953	LE2C24	39	LE5L13	-146	LE5E12	123
	LE30I22	-858	LE1P09	-29	LE13F06	363	LE5L09	145	LE6H08	-168	LE19G13	-523
	LE25L02	-716	LE24L10	674	LE28K14	-809	LE27F15	790	LE8G20	-216	LE22K10	-614
	LE1K24	-13	LE13F23	-373	LE24K20	-667	LE12J16	-334	LE17F18	478	LE12E14	-325
	LE31I24	886	LE15D07	427	LE26C10	743	LE25N18	-719	LE13H22	-365	LE33M05	935
	LE27P15	798	LE18D16	508	LE18M13	-497	LE13G13	347	LE6C12	158	LE33L13	958
	LE15E19	-412	LE30E17	-851	LE30J09	-871	LE2I09	32	LE13F06	363	LE3E12	-65
	LE24F16	-671	LE24H01	-684	LE18J03	518	LE20E07	-552	LE12H20	331	LE13F06	363
	LE7H17	-201	LE20I03	-553	LE24K20	-667	LE4G17	-93	LE4E05	-92	LE12C13	315
	LE33L13	-958	LE25H13	-727	LE25J21	-730	LE7E22	-187	LE32D10	914	LE8E05	-211
	LE24G08	-663	LE32E20	-908	LE9K02	-242	LE27I24	774	LE9D08	245	LE26N21	-762
	LE3E12	-65	LE14E03	-381	LE11P03	-312	LE3P08	-76	LE8A19	206	LE17D17	-483
	LE6M05	-154	LE14N13	-406	LE17I11	466	LE3D13	-81	LE30M01	854	LE5L22	136
	LE33J10	950	LE25E08	-702	LE7E22	-187	LE21F17	-603	LE12C13	315	LE15A11	-408
	LE17K05	-467	LE21F17	-603	LE18F04	-510	LE19I21	526	LE19P02	-544	LE4G17	93
	LE28K14	-809	LE31B15	-893	LE1K18	11	LE32D10	914	LE25G02	705	LE22K20	-616
	LE25M23	-699	LE19I21	-526	LE2C23	31	LE11L01	-957	LE19K01	527	LE1K24	-13
	LE21B20	-592	LE18K17	-495	LE30E01	850	LE20I22	-559	LE25G16	-706	LE11D13	-302
	LE5N23	-147	LE1I11	-4	LE28A03	799	LE6C03	-150	LE11F05	-305	LE33C11	-929
	LE4N21	-115	LE15E23	-413	LE21J10	595	LE24H16	-672	LE24P16	-678	LE31L12	891
	LE31A03	-876	LE3P24	-79	LE1H20	-17	LE7E22	-187	LE16O12	-446	LE14M13	-388
	LE32J15	-925	LE14B20	396	LE18F04	-510	LE21J10	595	LE5B05	-139	LE15L08	-424
	LE14I09	-385	LE15D07	427	LE27I24	774	LE13J08	-366	LE27J03	-793	LE7F05	199
	LE4N21	-115	LE20F11	-570	LE29B16	-836	LE9C07	229	LE11F05	-305	LE19D24	-539
	LE15D07	427	LE17I11	-466	LE21O01	-580	LE7E22	-187	LE8A19	206	LE18K23	496
	LE25N18	-719	LE29I13	-825	LE29M21	-828	LE19D04	538	LE18F04	-510	LE7F05	199
	LE18F04	-510	LE22L17	-625	LE5H14	-133	LE7E22	-187	LE7K13	-180	LE14M14	-395
	LE24H01	-684	LE19G16	-533	LE20O17	-555	LE10P06	-276	LE18J22	-512	LE21J01	-604
	LE5F02	-131	LE23K24	-642	LE14M01	-387	LE27I24	774	LE13L14	-369	LE7E22	-187
	LE16D06	-449	LE29H16	-837	LE19E04	-530	LE3P08	-76	LE14P15	407	LE12C13	315
	LE25H13	-727	LE13G02	-357	LE7N14	-196	LE7E22	-187	LE22B24	-620	LE11D13	-302
	LE3I05	-61	LE22M24	-618	LE6A23	-149	LE7E22	-187	LE25C17	-688	LE10C22	265
	LE3L23	88	LE17F05	-484	LE30K11	-853	LE15D09	428	LE21O01	-580	LE18J22	-512
	LE6A23	-149	LE9O01	-232	LE13L14	-369	LE7E22	-187	LE33M04	-945	LE8A19	206
	LE14B20	396	LE9A21	227	LE7E22	-187	LE32C12	-904	LE13M10	361	LE2F02	-47
	LE15D07	427	LE33M04	-945	LE28A03	799	LE31I21	-881	LE8A19	206	LE32A13	-898
	LE25H13	-727	LE29N03	-847	LE18N13	520	LE32H05	924	LE30E17	-851	LE15D09	-428
	LE19E04	-530	LE8A08	-212	LE10P06	-276	LE13F23	-373	LE13F06	363	LE33J18	951
	LE26A09	-734	LE2C24	-39	LE14E20	-391	LE7E22	-187	LE30M01	854	LE33K09	934
	LE26A11	-735	LE9K14	-243	LE7E22	-187	LE6M05	-154	LE13M10	-361	LE20K20	561
	LE10A16	-264	LE33C20	-939	LE17K22	-474	LE19D04	538	LE3B16	71	LE28O04	-810
	LE17J22	-480	LE17L11	-487	LE19P02	544	LE24P02	-676	LE8G20	-216	LE18M17	-498
	LE29K01	-827	LE16F13	-460	LE2D23	-50	LE15G24	419	LE13F06	363	LE8I04	-217
	LE26N08	-750	LE18F22	511	LE21P10	599	LE27H15	791	LE30M01	854	LE6M05	154
	LE21P16	-600	LE16F13	-460	LE13M10	-361	LE32K06	910	LE8A19	206	LE6E19	-152
	LE32E19	-900	LE11D13	-302	LE5B03	-138	LE7E22	-187	LE7I21	-179	LE22M24	-618
	LE25N18	-719	LE30P05	-874	LE7E22	-187	LE12A21	-314	LE27J01	-792	LE8E05	-211
	LE33M19	-937	LE1K24	-13	LE20C03	-551	LE7E22	-187	LE6O06	162	LE15D07	427
	LE7H17	-201	LE25N18	-719	LE7E22	-187	LE24H07	-685	LE14J14	399	LE31I24	886
	LE30M09	855	LE3P14	-78	LE6H11	175	LE30F24	864	LE15L08	424	LE27F11	789
	LE1B05	25	LE23F05	-650	LE24H22	-673	LE7E22	-187	LE7I20	-192	LE13J08	-366
	LE12O23	-320	LE3E12	-65	LE16I17	-439	LE7E22	-187	LE18P07	521	LE29J18	-840
	LE21N10	-598	LE26A05	-733	LE7E22	-187	LE11N13	-310	LE31B20	889	LE8A19	206
	LE12N03	-341	LE14E03	-381	LE19D04	538	LE8A08	-212	LE17L11	-487	LE24O03	-660
	LE27J17	-794	LE15D07	427	LE26N13	-761	LE7K13	180	LE17G02	-471	LE32D10	914
	LE23O09	-636	LE10I24	-269	LE7E22	-187	LE23E23	-631	LE12P18	335	LE8A19	206
	LE21L20	-597	LE21F17	-603	LE30O16	-862	LE9E04	236	LE4N21	-115	LE27F15	-790
	LE27E03	-764	LE15D07	427	LE6B08	-165	LE19D04	538	LE27P11	-797	LE4I18	-100
	LE27F11	-789	LE33J10	950	LE7E22	-187	LE32L11	-926	LE11B16	-293	LE8A19	206
	LE3P12	-77	LE10G13	-261	LE24F15	683	LE18K23	-496	LE13F06	363	LE15G13	414
	LE18N13	-520	LE19E04	-530	LE3I05	-61	LE21J10	595	LE25B07	-720	LE12J12	333
	LE14P14	402	LE13A13	344	LE3P08	-76	LE33M19	-937	LE23E11	629	LE8A19	206
	LE18J22	-512	LE1D23	-27	LE29M08	-834	LE7E22	-187	LE13L10	-368	LE20E07	-552
	LE25B15	-721	LE33M19	-937	LE32O17	-902	LE7E22	-187	LE29K04	-832	LE28K06	-807
	LE27F04	-783	LE10G13	-261	LE25N18	-719	LE24H01	-684	LE14J14	399	LE7K12	193
	LE23K24	-642	LE3D05	-80	LE7A14	-184	LE7E22	-187	LE11N11	-309	LE28L05	820
	LE16F18	-453	LE3E12	-65	LE17G07	-465	LE16C04	442	LE7D01	198	LE15L08	424
	LE30D23	-868	LE8A24	-213	LE11M23	-286	LE17I11	466	LE26C10	-743	LE19K01	527
	LE4M10	-104	LE15D07	427	LE33E01	931	LE17H05	486	LE6C10	-157	LE18P07	521
	LE5I05	-118	LE22A15	-609	LE9C07	-229	LE27M16	777	LE16G02	443	LE5D08	130
	LE11B13	-300	LE6A06	-156	LE3P08	-76	LE3L24	-73	LE11E06	-288	LE32K20	-911
	LE14A11	379	LE15D07	427	LE11H19	-308	LE19P02	544	LE14D10	-397	LE25H13	-727
	LE28A14	802	LE12J19	-338	LE11J16	-297	LE7E22	-187	LE13L23	-374	LE9B13	253
	LE7A14	-184	LE22A15	-609	LE18K23	-496	LE16C04	442	LE31A11	-877	LE27C02	769
	LE21O12	-589	LE27C02	-769	LE1K24	-13	LE9F15	254	LE10G13	-261	LE23K10	-641
	LE17B07	-481	LE12J16	-334	LE25M02	709	LE25N18	-719	LE23E19	630	LE15N24	426
	LE12D04	-330	LE27P15	-798	LE33E01	-931	LE7E22	-187	LE10J17	280	LE30E01	-850
	LE10A11	-259	LE30F05	-869	LE32A17	899	LE10P06	-276	LE15I14	-420	LE7N03	204
	LE23K21	-634	LE22A15	-609	LE7E22	-187	LE3G06	-66	LE13F23	-373	LE15E19	-412
	LE6H09	-174	LE25J18	-715	LE21K09	-578	LE27I24	774	LE12P18	335	LE8G20	-216
	LE3E12	-65	LE6C03	-150	LE7E22	-187	LE22B24	-620	LE4F22	108	LE8L19	224
	LE21F17	-603	LE14D05	-403	LE3P08	-76	LE24F16	-671	LE31A13	878	LE14M13	-388
	LE22E07	-611	LE17G22	-472	LE3P08	-76	LE14E20	-391	LE25C19	-689	LE12C13	315
	LE16D08	-450	LE7A04	-183	LE19D04	538	LE26B11	-755	LE21P16	-600	LE16F13	-460
	LE15D07	427	LE7M09	-181	LE19D04	538	LE19C20	-529	LE22M19	-613	LE33M04	945
	LE20H18	-568	LE5I07	-119	LE18C20	-500	LE13B05	372	LE31C07	-879	LE24G08	-663
	LE33A03	-928	LE15L08	-424	LE7E22	-187	LE32D10	-914	LE5E12	123	LE8G20	-216
	LE17G02	-471	LE8C23	-210	LE31B20	889	LE3L07	86	LE24B21	681	LE20C03	551
	LE13K13	-348	LE27C02	-769	LE12N03	341	LE15N24	426	LE8A19	206	LE28J07	-819
	LE15L08	424	LE32O17	-902	LE27H15	791	LE18E13	492	LE22K20	-616	LE19D04	538
	LE14A11	-379	LE11P03	-312	LE27I24	774	LE16F18	-453	LE30K11	-853	LE12J12	333
	LE8C21	-209	LE19P07	-548	LE20F18	-567	LE3P08	-76	LE13F06	363	LE9O01	-232
	LE14M13	-388	LE30P05	-874	LE30G05	-852	LE1K21	-6	LE24G08	-663	LE21G08	-584
	LE3E12	-65	LE32O17	-902	LE13L04	-367	LE16C04	442	LE23L17	-654	LE1C02	-7
	LE27J08	-786	LE31N18	-892	LE3P08	-76	LE21F17	-603	LE29N13	848	LE24F16	-671
	LE19J24	-543	LE15D07	427	LE22H05	-623	LE31A10	-884	LE5L13	-146	LE18J22	-512
	LE24H01	-684	LE1B07	-26	LE22K20	-616	LE19D04	538	LE4N21	-115	LE33G20	-940
	LE15D07	427	LE16D22	452	LE7K13	180	LE29L05	-845	LE31M07	-882	LE24L10	-674
	LE24H22	-673	LE31B15	-893	LE25M23	-699	LE19I21	-526	LE13F06	363	LE29H16	-837
	LE3P24	-79	LE26F02	-747	LE18G02	-501	LE28I20	-806	LE28B13	-817	LE1P20	-24
	LE32N22	-917	LE3M09	-62	LE7E22	-187	LE19M21	-528	LE17D14	-477	LE22M24	-618
	LE22L17	-625	LE2C08	-38	LE6H16	-169	LE3P08	-76	LE13F06	363	LE24L10	674
	LE14B20	396	LE3L24	-73	LE3P08	-76	LE32I04	-909	LE29L04	-841	LE27J17	-794
	LE6P11	-178	LE31D04	-890	LE8H10	222	LE11H19	-308	LE3B16	71	LE6E19	152
	LE25G09	-695	LE25P19	-732	LE19D04	538	LE18M13	-497	LE15I13	-416	LE5I05	-118
	LE8A19	-206	LE23E09	-628	LE3P08	-76	LE26E05	-737	LE18E15	-493	LE17H04	-479
	LE16C04	-442	LE9O01	-232	LE2D23	-50	LE3P08	-76	LE18J22	-512	LE28K19	-801
	LE11I02	-289	LE30J09	871	LE3P08	-76	LE18G18	-503	LE6D15	172	LE31H21	-895
	LE19I19	525	LE14B20	396	LE20C03	-551	LE24K20	-667	LE7H17	-201	LE25N18	-719
	LE27E06	-772	LE16F13	-460	LE11C05	-281	LE3L07	86	LE16F18	-453	LE33M04	945
	LE15D07	427	LE30J09	-871	LE25J17	-729	LE3P08	-76	LE20F11	-570	LE11D01	-301
	LE32E20	-908	LE24K14	-666	LE15I13	416	LE8C01	-207	LE20I03	-553	LE27D24	-782
	LE20C01	-550	LE25O04	-711	LE3P08	-76	LE21M20	-588	LE13F23	373	LE22L17	625
	LE17H01	-485	LE32E20	-908	LE25N10	-718	LE3P08	-76	LE30M01	854	LE25E13	-691
	LE15I14	-420	LE33I24	-943	LE15D09	428	LE1L08	-21	LE7H17	-201	LE5G10	-125
	LE23J18	645	LE12N03	341	LE3P08	-76	LE25C12	-701	LE15F07	-430	LE16B03	-456
	LE17P03	-490	LE11D13	-302	LE32J15	-925	LE19D04	538	LE18J22	-512	LE7A04	-183
	LE6H13	-176	LE12J16	-334	LE32E04	-906	LE25M23	-699	LE6A23	-149	LE9O01	-232
	LE3I08	-68	LE30D03	-867	LE3P08	-76	LE18B07	-515	LE31N03	896	LE14D10	397
	LE31B15	-893	LE13G06	-358	LE4L04	-110	LE18E13	492	LE19M21	528	LE21G01	-575
	LE3L23	88	LE15H16	-422	LE31A10	-884	LE18P14	-514	LE8A19	206	LE32I04	909
	LE20I15	-554	LE29B16	-836	LE24G08	663	LE25C11	-687	LE8A08	212	LE17B07	-481
	LE20C03	-551	LE3O23	-63	LE15N24	-426	LE16C04	442	LE15F07	-430	LE13C03	-345
	LE12J19	-338	LE25N18	-719	LE3P08	-76	LE19F15	-545	LE30K11	-853	LE22K20	-616
	LE25N18	-719	LE7I20	-192	LE11P03	-312	LE31I24	886	LE8C21	-209	LE13A05	343
	LE10E16	-267	LE33C11	-929	LE23D06	644	LE27J01	-792	LE11N11	-309	LE26N14	-751
	LE18G02	-501	LE25H13	-727	LE31A11	-877	LE19D04	538	LE12N03	-341	LE2F02	47
	LE8L19	-224	LE28K06	-807	LE13C15	346	LE29N13	848	LE33M05	935	LE24G11	-657
	LE25H13	-727	LE9J02	-249	LE23M14	-643	LE20E07	-552	LE31H21	-895	LE11P03	312
	LE4N21	-115	LE32C20	-905	LE12N03	-341	LE2F02	47	LE8A19	206	LE19K04	536
	LE25N18	-719	LE29K04	-832	LE19E04	-530	LE20I22	-559	LE5B03	-138	LE18N13	520
	LE3B16	-71	LE19E04	-530	LE5L22	-136	LE14G07	383	LE21O22	-590	LE25E05	-690
	LE4D06	106	LE18C20	500	LE25D23	725	LE18F04	-510	LE19G14	532	LE29L05	845
	LE10G13	-261	LE12A12	-322	LE10E02	-266	LE31A10	-884	LE31K20	-888	LE16G02	443
	LE20F11	-570	LE22A15	-609	LE14M13	-388	LE30L15	-873	LE4I20	101	LE22L17	625
	LE1I11	-4	LE6B23	-171	LE3P08	-76	LE2K21	-35	LE10I24	-269	LE5I05	-118
	LE3N24	-75	LE10C07	-260	LE22N03	-626	LE3P08	-76	LE10E16	-267	LE33M19	-937
	LE28L05	820	LE11P03	312	LE7E22	-187	LE14J12	-398	LE10C22	265	LE18F22	511
	LE17L11	-487	LE11L01	-957	LE24G08	663	LE23E09	-628	LE12A12	-322	LE22M24	-618
	LE20I15	-554	LE12D04	-330	LE30I22	858	LE6B08	-165	LE13F06	363	LE17F05	484
	LE15M15	-418	LE10E16	-267	LE6M11	-155	LE6O06	-162	LE20F11	-570	LE6P11	-178
	LE22A15	-609	LE24M14	-669	LE11O14	292	LE21P16	600	LE15L08	-424	LE25E08	-702
	LE2K01	-33	LE31K16	-887	LE3P08	-76	LE31A11	-877	LE12J12	-333	LE11B16	293
	LE10O10	-272	LE27J01	-792	LE3P08	-76	LE21B08	-591	LE21P16	-600	LE31M07	-882
	LE14B20	-396	LE22L17	-625	LE26C10	743	LE11L01	-957	LE12J21	-339	LE16B03	-456
	LE15E19	-412	LE9M18	-244	LE25B07	-720	LE30I22	858	LE15L08	-424	LE27J03	-793
	LE24C15	-656	LE17B07	-481	LE33A03	928	LE27J17	-794	LE16D21	-459	LE11D13	-302
	LE20F18	567	LE2K22	-43	LE26F06	-748	LE30I22	858	LE13K23	349	LE22K20	616
	LE18J03	-518	LE25N18	-719	LE26N09	-760	LE19D04	538	LE25N18	-719	LE25M06	710
	LE13F23	-373	LE5P12	-137	LE33L13	-958	LE3P08	-76	LE11N21	-311	LE5L02	-134
	LE18J22	-512	LE1C17	-1	LE32D10	914	LE8E05	-211	LE21G01	-575	LE18N13	520
	LE11P03	-312	LE30E17	-851	LE31A10	-884	LE30F24	-864	LE18G18	-503	LE3D16	-72
	LE23E23	-631	LE33I24	-943	LE5F02	-131	LE27P11	-797	LE13P17	-378	LE8G20	-216
	LE23E12	-640	LE3P24	-79	LE32D10	914	LE1C02	-7	LE32N22	-917	LE32E19	-900
	LE18F04	-510	LE9G18	-239	LE28J07	-819	LE24G08	663	LE8H10	-222	LE30M01	854
	LE29F23	-844	LE8C21	-209	LE24G08	663	LE26A09	-734	LE12E08	-324	LE18J22	-512
	LE12C13	-315	LE6P11	-178	LE3L07	86	LE15F07	-430	LE15L08	424	LE13L14	369
	LE9F20	-247	LE33I24	-943	LE25O04	-711	LE2K11	-34	LE8A19	206	LE23K13	-633
	LE3L15	-87	LE22L17	-625	LE21L16	-596	LE21B09	-601	LE26J07	-759	LE7N01	-203
	LE1K05	-5	LE15D07	-427	LE16D21	-459	LE31I24	886	LE20K20	-561	LE10I24	-269
	LE33I02	-942	LE5F02	-131	LE7J11	-202	LE25H13	727	LE9C11	230	LE30M01	854
	LE3P24	-79	LE33C11	-929	LE24G08	663	LE9G18	-239	LE14P15	407	LE3L07	-86
	LE11K19	-285	LE27P15	-798	LE31L12	-891	LE31A10	-884	LE12P11	342	LE4K06	-102
	LE9G18	-239	LE16J12	-454	LE6O06	162	LE7O15	182	LE30F08	-863	LE33C06	-938
	LE3H15	83	LE12M01	-318	LE30L15	-873	LE12E24	-326	LE12J16	-334	LE9I20	241
	LE5F02	-131	LE25E08	-702	LE10D07	278	LE18G02	-501	LE9B11	-252	LE4G22	-99
	LE1G11	-2	LE30M09	855	LE21K07	577	LE10P06	-276	LE16C04	-442	LE9O01	-232
	LE25J21	-730	LE7E22	-187	LE28O14	-811	LE31A10	-884	LE22K20	-616	LE27M24	-778
	LE28N24	-816	LE18J22	-512	LE15J04	-423	LE11P21	313	LE30E17	-851	LE12E14	-325
	LE3E12	-65	LE27J03	-793	LE5K19	-120	LE25N18	-719	LE15E11	411	LE25N18	-719
	LE1K20	-12	LE6O14	-164	LE30L15	-873	LE25L02	-716	LE24P02	-676	LE21I23	-576
	LE25E08	-702	LE27J08	-786	LE11P03	-312	LE21B08	-591	LE24F16	-671	LE4F22	108
	LE33I24	-943	LE23K21	-634	LE7J11	-202	LE30L15	-873	LE18F04	-510	LE14P14	402
	LE11P03	-312	LE25E12	-703	LE16O12	-446	LE10P06	-276	LE28I20	-806	LE24C15	-656
	LE15L12	-425	LE9K14	-243	LE16C04	442	LE1J12	-19	LE18D24	-509	LE26N14	-751
	LE23L18	-646	LE18F15	-517	LE30L15	-873	LE15H16	-422	LE13C24	354	LE9A21	-227
	LE11H20	-296	LE18M21	-499	LE5L20	135	LE9L03	255	LE25B15	-721	LE15M07	417
	LE1D23	-27	LE27L21	795	LE25N18	-719	LE24G08	663	LE27C02	-769	LE1H08	-14
	LE26N13	-761	LE20I15	-554	LE19E04	-530	LE30E01	850	LE3B16	71	LE16F18	-453
	LE14B20	396	LE3M09	62	LE11P21	313	LE20I03	-553	LE17D17	-483	LE33G22	-941
	LE24H16	-672	LE3L23	88	LE32K06	910	LE6H02	-167	LE30P19	875	LE32B03	-919
	LE14D10	-397	LE25H13	-727	LE16O12	-446	LE31I24	886	LE32N22	-917	LE22M24	-618
	LE25N18	-719	LE31H21	-895	LE24G08	663	LE15H16	-422	LE15M07	417	LE16N07	-461
	LE20I22	-559	LE29D09	-843	LE15N24	426	LE17J22	-480	LE18K23	-496	LE27J03	-793
	LE14B20	396	LE25G07	-694	LE31I24	886	LE25H18	-713	LE20A19	549	LE27C02	769
	LE3P08	-76	LE24F16	-671	LE11K16	-290	LE11P03	-312	LE17F05	-484	LE24G08	-663
	LE19I21	-526	LE32B03	-919	LE33A03	928	LE32C12	-904	LE6P11	-178	LE21O12	-589
	LE21O23	-581	LE21J03	-605	LE28G20	-805	LE7N14	-196	LE9D08	-245	LE4G22	-99
	LE16I17	-439	LE11B13	-300	LE11F05	-305	LE29M21	-828	LE22N03	-626	LE4E05	92
	LE15E19	-412	LE25G03	-693	LE33G20	-940	LE32K06	910	LE1C02	-7	LE22K20	-616
	LE8C21	-209	LE29N13	-848	LE30L15	-873	LE21D21	-602	LE10O10	-272	LE26H01	-757
	LE11H20	-296	LE20F11	-570	LE3P08	-76	LE6H11	-175	LE13O06	-362	LE26E09	-738
	LE18J22	-512	LE30E17	-851	LE27B04	-780	LE18E15	-493	LE15I07	415	LE15L08	424
	LE25N18	-719	LE29K24	-833	LE19L21	546	LE7E22	-187	LE13E24	356	LE22L17	625
	LE3E12	-65	LE25J10	-714	LE27C02	-769	LE27B04	-780	LE22M24	-618	LE15J04	-423
	LE12E14	325	LE3H15	83	LE29J18	-840	LE17E17	-464	LE16B20	448	LE30M01	854
	LE19I21	526	LE15L08	424	LE30L15	-873	LE17D06	-476	LE11D13	-302	LE20K20	-561
	LE3P24	-79	LE6H02	-167	LE20E07	-552	LE26N13	-761	LE18F15	-517	LE17H04	-479
	LE12J16	-334	LE9D08	-245	LE30E01	-850	LE32K06	910	LE33C06	-938	LE16C04	-442
	LE11P03	-312	LE24D10	-670	LE11P03	-312	LE26I14	-745	LE26N09	-760	LE23D06	-644
	LE15L08	424	LE14P14	-402	LE15A11	-408	LE23D07	-649	LE23J18	-645	LE32F16	-915
	LE23J03	-651	LE14N13	-406	LE33J18	-951	LE12O23	320	LE15D07	427	LE22L17	625
	LE12L14	624	LE22D16	-622	LE30M01	-854	LE15A11	-408	LE26F13	-756	LE15L08	-424
	LE12E24	-326	LE10I24	-269	LE24N20	675	LE15N24	426	LE20E16	558	LE8A19	206
	LE33I24	-943	LE1K18	-11	LE14M21	-389	LE15A11	-408	LE16N07	461	LE6J15	-177
	LE10I24	-269	LE11F05	-305	LE18F15	-517	LE17H04	-479	LE21N10	-598	LE9F20	247
	LE9F15	-254	LE9A21	-227	LE25M23	-699	LE17H04	-479	LE5L02	-134	LE27J03	-793
	LE20A19	-549	LE5F02	-131	LE24G08	663	LE12A21	-314	LE23O09	-636	LE10I24	-269
	LE19E04	-530	LE9E08	-237	LE11H19	-308	LE25M23	-699	LE5F02	-131	LE29L05	-845
	LE3H09	-82	LE3E12	-65	LE32E12	-907	LE15A11	-408	LE30M01	854	LE19G16	533
	LE2D23	-50	LE3P08	-76	LE20H18	-568	LE25N18	-719	LE6O06	162	LE6E22	159
	LE14P10	-401	LE16B03	-456	LE16G07	-437	LE1L08	-21	LE27C02	-769	LE17H05	486
	LE10G13	-261	LE1K08	-10	LE32K06	910	LE21C14	-583	LE29K24	833	LE14I09	385
	LE19E04	-530	LE33J10	-950	LE30L15	-873	LE20I22	-559	LE10D01	-277	LE18D24	-509
	LE15H16	-422	LE2H02	-48	LE25J21	-730	LE29P24	-842	LE31L12	891	LE14P14	-402
	LE24G08	663	LE9G18	-239	LE16F13	-460	LE16B11	-457	LE30M01	854	LE22C15	610
	LE10I24	-269	LE5I05	-118	LE11I02	-289	LE30J09	871	LE8A19	206	LE25I06	707
	LE16F18	-453	LE11H20	-296	LE25H13	-727	LE33A03	928	LE3D05	-80	LE5I05	-118
	LE18J22	-512	LE21M07	-579	LE32D10	914	LE6M11	-155	LE8A19	206	LE21B08	-591
	LE30A07	-849	LE3E12	-65	LE21C14	-583	LE3N24	-75	LE15N24	426	LE17J22	-480
	LE25N18	-719	LE18M20	-504	LE31I21	-881	LE2C23	-31	LE11M23	-286	LE17I11	466
	LE20H18	-568	LE20I22	-559	LE33J04	-949	LE12P18	335	LE33C06	-938	LE26E05	-737
	LE18J22	-512	LE21J01	-604	LE21G01	-575	LE18N13	520	LE22H05	623	LE30M01	854
	LE5B03	-138	LE25A03	-686	LE13C24	-354	LE32K06	910	LE21P16	-600	LE6E22	159
	LE26A05	-733	LE31H21	-895	LE9M18	-244	LE11P03	-312	LE23L18	-646	LE27F15	-790
	LE4K08	-103	LE21O23	-581	LE30K12	859	LE2H02	-48	LE27O11	-768	LE11F05	-305
	LE33M19	-937	LE26P24	-754	LE13E20	-355	LE25M23	-699	LE33J10	950	LE30K11	-853
	LE27J01	-792	LE3P24	-79	LE10P06	-276	LE9A14	-234	LE15I13	416	LE8C01	-207
	LE27J01	-792	LE26H01	-757	LE15N24	426	LE27F11	789	LE5D08	-130	LE11D13	-302
	LE10M06	-271	LE25G09	-695	LE31I21	-881	LE15F05	-429	LE7K13	-180	LE33C11	-929
	LE3H15	83	LE12A12	-322	LE29P24	-842	LE15E19	-412	LE32D10	914	LE1C02	-7
	LE24N20	-675	LE32E20	-908	LE30I22	858	LE11D21	-303	LE27O11	-768	LE16G02	-443
	LE3E12	-65	LE33C06	-938	LE18E15	-493	LE17H04	-479	LE11B13	300	LE4G17	-93
	LE27J03	-793	LE22L17	-625	LE24G08	663	LE5L02	-134	LE11N11	-309	LE11N14	-298
	LE20F18	567	LE20F18	567	LE13I24	-360	LE30L15	-873	LE26H11	758	LE22K20	616
	LE33M19	-937	LE14A11	-379	LE27C08	-770	LE12K03	-317	LE16B20	-448	LE13C03	-345
	LE18K23	-496	LE11F05	305	LE20E07	-552	LE2O24	-44	LE24P24	-679	LE24E24	-662
	LE6C10	-157	LE18K17	495	LE7I10	191	LE21B20	-592	LE27C02	769	LE28H01	-818
	LE18E15	-493	LE17H04	-479	LE7K13	180	LE15D09	-428	LE5F02	-131	LE27P11	-797
	LE3P24	-79	LE28I11	-800	LE23E12	-640	LE31A10	-884	LE8A19	206	LE25P19	-732
	LE2F02	-47	LE25N18	-719	LE25C17	-688	LE10C22	265	LE18E13	-492	LE30O16	-862
	LE28L05	-820	LE19E04	-530	LE9E04	-236	LE25M23	-699	LE10H23	-279	LE15L08	-424
	LE21O01	-580	LE7E22	-187	LE5I07	-119	LE27M16	777	LE15N24	426	LE21O01	-580
	LE24B21	-681	LE22A15	-609	LE4K08	-103	LE30L15	-873	LE3N24	-75	LE27J01	-792
	LE9I16	-240	LE3P24	-79	LE33H13	-955	LE25M23	-699	LE8C24	215	LE32D10	914
	LE9A14	-234	LE16D08	-450	LE15A11	-408	LE19I14	-535	LE15J03	-431	LE27E11	-765
	LE10A11	-259	LE26N13	-761	LE23O09	-636	LE18M21	499	LE29K04	-832	LE24G08	-663
	LE13B05	-372	LE11P03	-312	LE23D07	649	LE28I20	-806	LE27H15	-791	LE25M23	-699
	LE25L02	-716	LE33I24	-943	LE13L14	-369	LE33C20	-939	LE8C21	-209	LE12C23	-316
	LE19J10	-542	LE19I21	-526	LE3I08	-68	LE30D03	-867	LE7N01	-203	LE18P06	-513
	LE2H02	-48	LE27C15	-763	LE25M23	-699	LE13C06	-353	LE15L08	-424	LE19I14	-535
	LE30E01	-850	LE3P24	-79	LE27H15	-791	LE25M23	-699	LE18P14	-514	LE15M07	417
	LE12J12	333	LE9C22	235	LE6P11	-178	LE33M19	-937	LE22K20	616	LE25I05	698
	LE25G09	-695	LE6O14	-164	LE23C04	-637	LE30L15	-873	LE25M23	-699	LE33E05	-932
	LE19E04	-530	LE5B03	-138	LE3E12	-65	LE25M23	-699	LE10I24	-269	LE5D08	-130
	LE12J19	-338	LE3H15	83	LE11P03	-312	LE27K16	-775	LE6P11	-178	LE6C11	-151
	LE17D14	-477	LE21O23	-581	LE5B03	-138	LE18N13	520	LE4K23	94	LE6O14	-164
	LE11D13	-302	LE11E06	-288	LE10P06	-276	LE17M21	-468	LE21J03	-605	LE14J14	399
	LE15L08	-424	LE19I14	-535	LE23C14	-639	LE25M23	-699	LE30M01	854	LE29I07	824
	LE28I20	-806	LE17M21	-468	LE12O23	320	LE4L04	-110	LE20I03	-553	LE31A10	-884
	LE10I24	-269	LE1P09	-29	LE11P03	-312	LE29M08	-834	LE24K15	-659	LE21J03	-605
	LE30M09	855	LE29J02	838	LE26P02	-752	LE24H01	-684	LE6P11	178	LE27G12	773
	LE20I03	-553	LE33C20	-939	LE9H08	248	LE21I23	-576	LE28B13	-817	LE3N10	74
	LE29L11	-846	LE11N21	-311	LE25M23	-699	LE16C03	-436	LE8A19	206	LE11E23	-284
	LE13H22	-365	LE19I21	-526	LE17G02	-471	LE32D10	914	LE21P16	-600	LE18B07	515
	LE20F11	-570	LE14N13	-406	LE32K06	910	LE29N03	-847	LE24G08	-663	LE5M04	-127
	LE31B15	-893	LE2F23	-53	LE20I03	-553	LE31A10	-884	LE13F06	363	LE26N09	-760
	LE10A11	-259	LE20D22	-565	LE29K24	-833	LE17F05	-484	LE15D09	-428	LE8G20	-216
	LE9J02	-249	LE3E12	-65	LE6H13	-176	LE25F07	-726	LE18J22	-512	LE21A16	-582
	LE23K21	-634	LE2C24	-39	LE31A10	-884	LE25J18	-715	LE23J18	645	LE12J16	-334
	LE3E12	-65	LE25C19	-689	LE15A11	-408	LE4I18	-100	LE11D13	-302	LE3P14	-78
	LE33I24	-943	LE8P17	-226	LE25M23	-699	LE16M01	-440	LE25H13	-727	LE29N03	-847
	LE30I06	-857	LE14M13	-388	LE7K13	-180	LE14M14	-395	LE5E12	-123	LE24G08	-663
	LE28N13	-821	LE24L10	-674	LE21K07	-577	LE6P11	-178	LE22L17	625	LE15L08	424
	LE26N06	-749	LE27C02	-769	LE19K24	-537	LE16K04	-444	LE11K19	-285	LE8A19	206
	LE29D09	-843	LE3E12	-65	LE24K20	-667	LE32D15	-922	LE2H15	-54	LE21K18	-587
	LE7N03	-204	LE13F23	-373	LE27J01	-792	LE8E05	-211	LE4G22	-99	LE16B20	-448
	LE18J22	-512	LE30G05	-852	LE18J22	-512	LE5J05	-141	LE25I06	-707	LE8G20	-216
	LE9H08	248	LE16D08	-450	LE6M05	-154	LE7N03	-204	LE15L08	-424	LE10C22	-265
	LE10A11	-259	LE32G19	-901	LE10I24	-269	LE32D10	914	LE10O10	-272	LE17P03	-490
	LE31I21	-881	LE2N21	-56	LE4G17	-93	LE20I22	-559	LE4G22	-99	LE31P23	-897
	LE15G13	414	LE18F22	511	LE24C15	-656	LE32K06	910	LE33G22	-941	LE24D10	-670
	LE27O24	-779	LE3P24	-79	LE3N24	-75	LE10C07	-260	LE22M24	-618	LE18K23	-496
	LE27H15	-791	LE25M23	-699	LE8G20	-216	LE15B04	-421	LE2D23	-50	LE15G24	419
	LE31I21	-881	LE7I21	-179	LE22G01	612	LE31K20	888	LE3M09	-62	LE27C02	769
	LE17C15	-463	LE24P06	-677	LE3N24	-75	LE18E15	-493	LE8C21	-209	LE23J19	653
	LE8B10	-220	LE19I21	-526	LE9H08	248	LE16D08	-450	LE18G12	-502	LE25E05	-690
	LE7L20	-438	LE19E04	-530	LE20C03	-551	LE11P21	313	LE22K20	616	LE21O12	589
	LE27C02	-769	LE9E04	-236	LE9E04	236	LE1K24	-13	LE32F16	-915	LE13J08	-366
	LE31B15	-893	LE2F01	-51	LE6O06	-162	LE11P21	313	LE30E01	850	LE20I22	-559
	LE25J18	-715	LE15E19	-412	LE8C13	-208	LE27B06	781	LE25G07	-694	LE7F05	199
	LE3E12	-65	LE21P10	-599	LE30I22	858	LE26O05	-742	LE26E09	-738	LE30M01	854
	LE23J05	-652	LE32E20	-908	LE25N18	-719	LE9F20	247	LE14E20	-391	LE24G08	-663
	LE27B04	-780	LE33E01	-931	LE22M19	-613	LE11P03	-312	LE32A17	-899	LE29K24	833
	LE20I22	-559	LE30E17	-851	LE3G22	67	LE12D04	330	LE25C11	-687	LE4G22	-99
	LE33J04	-949	LE22M24	-618	LE25D05	-722	LE31I21	-881	LE33M05	935	LE13B05	-372
	LE30F08	-863	LE11K19	-285	LE1K24	-13	LE13F23	-373	LE4N21	-115	LE6O06	162
	LE21O12	-589	LE3P24	-79	LE32D10	914	LE16M01	-440	LE21O22	-590	LE27P11	-797
	LE11E05	-283	LE2C24	-39	LE19E04	-530	LE2C23	-31	LE8A19	206	LE21K07	-577
	LE32F16	-915	LE24D10	-670	LE8P17	226	LE20I22	-559	LE10I24	-269	LE11F05	-305
	LE24P24	-679	LE21O23	-581	LE29J18	-840	LE20K20	-561	LE13F20	364	LE29J02	838
	LE19G14	-532	LE31I21	-881	LE31H21	-895	LE1L09	28	LE28L12	-814	LE13C03	-345
	LE6H09	-174	LE22L17	-625	LE20E07	-552	LE7J11	-202	LE15E23	-413	LE27B06	781
	LE28K14	-809	LE3E12	-65	LE15L12	-425	LE9K14	-243	LE15D09	-428	LE33G22	-941
	LE3P24	-79	LE7G16	-189	LE26N21	-762	LE11P03	-312	LE22K20	-616	LE28A03	-799
	LE29L05	-845	LE2D23	-50	LE24G08	663	LE20F11	-570	LE13L04	-367	LE1P20	-24
	LE16P01	462	LE21P16	600	LE31I24	886	LE28E12	-804	LE33G22	-941	LE28J07	-819
	LE23E09	-628	LE19G14	-532	LE32H01	-923	LE23L18	-646	LE22L17	-625	LE22M24	-618
	LE8C23	-210	LE13F06	-363	LE25M23	-699	LE4B21	-113	LE10O22	274	LE29L05	-845
	LE11H20	-296	LE19J24	-543	LE2C24	39	LE29J02	838	LE12A10	-321	LE15D07	-427
	LE2F02	-47	LE20D22	-565	LE18F15	-517	LE11P21	313	LE19D04	538	LE26B11	-755
	LE7I10	-191	LE14M13	-388	LE15I14	-420	LE11P03	-312	LE13F23	373	LE8A08	212
	LE26F13	-756	LE15L08	-424	LE24G08	-663	LE13C03	-345	LE22K10	-614	LE11P03	312
	LE21O22	-590	LE27P11	-797	LE6O14	-164	LE14M21	389	LE4G22	-99	LE6D15	-172
	LE3P24	-79	LE23J18	-645	LE2C24	-39	LE28G20	-805	LE24D10	-670	LE17F18	478
	LE15I13	-416	LE15D07	427	LE11D01	-301	LE3J17	-84	LE33L13	-958	LE25H13	-727
	LE21C14	-583	LE25G09	-695	LE25J10	-714	LE15A11	-408	LE2C24	-39	LE12C13	315
	LE17F18	-478	LE20D22	-565	LE18E13	-492	LE30O16	-862	LE9A08	-233	LE27P11	-797
	LE25N18	-719	LE18F15	-517	LE29M21	-828	LE11H08	-295	LE10I24	-269	LE28L12	-814
	LE2H02	-48	LE11K16	-290	LE21L20	-597	LE31I21	-881	LE29E13	822	LE13F06	363
	LE29K01	-827	LE25N18	-719	LE20F11	-570	LE11D01	-301	LE4I18	100	LE19C21	522
	LE7J11	-202	LE25H13	727	LE33C20	-939	LE25M23	-699	LE11B13	-300	LE11D13	-302
	LE19L21	-546	LE15D07	427	LE5P17	-148	LE29L04	841	LE7G02	-188	LE18D24	-509
	LE10G13	-261	LE26F02	-747	LE18G02	-501	LE25H13	-727	LE15N24	-426	LE4G22	-99
	LE29O17	-830	LE4C09	91	LE17B07	-481	LE18K23	-496	LE26P02	-752	LE24H01	-684
	LE2H15	-54	LE12J16	-334	LE24M14	-669	LE33H12	-948	LE8A19	206	LE15I14	-420
	LE27G12	-773	LE31N18	-892	LE17B07	-481	LE12J16	-334	LE10J17	280	LE25G03	-693
	LE24F16	-671	LE26I14	-745	LE27P11	-797	LE30E01	-850	LE29K04	-832	LE24F03	682
	LE19E04	-530	LE28I11	-800	LE15P07	-432	LE11P03	-312	LE3A07	57	LE29P24	-842
	LE5L13	146	LE29P24	842	LE2O19	-36	LE29J18	-840	LE11D13	-302	LE10C07	-260
	LE1H20	-17	LE7E22	-187	LE3C14	-64	LE27C24	-771	LE24G08	-663	LE16I17	-439
	LE7A04	-183	LE11L01	-957	LE3N24	-75	LE27J01	-792	LE19K01	-527	LE31L12	891
	LE28I20	-806	LE11D14	-294	LE18P06	-513	LE26N08	-750	LE4N21	-115	LE6G08	-160
	LE9C22	-235	LE11K19	-285	LE29K24	-833	LE26N09	-760	LE18M21	-499	LE22K20	-616
	LE28I20	-806	LE18F04	-510	LE13P17	-378	LE19E04	-530	LE2A05	-30	LE30M01	854
	LE10I24	-269	LE6P11	-178	LE29M21	-828	LE16D22	-452	LE5E12	-123	LE22M24	-618
	LE3N24	-75	LE18E15	-493	LE9A08	-233	LE27P11	-797	LE2K21	-35	LE20I03	-553
	LE20I03	-553	LE26N21	-762	LE11D01	-301	LE25B15	-721	LE29L11	-846	LE11N21	-311
	LE12D04	-330	LE25N18	-719	LE21L20	-597	LE7H09	-200	LE12A12	-322	LE11N11	-309
	LE18F22	-511	LE10G13	-261	LE21M07	-579	LE14P10	-401	LE7P03	-205	LE22K20	-616
	LE18F04	-510	LE32L11	-926	LE21N10	-598	LE2C23	-31	LE7L20	-438	LE15L08	424
	LE26N13	-761	LE8P01	-225	LE24E12	661	LE13C03	345	LE7N03	-204	LE13F23	-373
	LE18F04	-510	LE16G07	-437	LE2C23	-31	LE21B20	-592	LE9L22	-250	LE18K23	-496
	LE23L17	-654	LE11B05	-299	LE24G08	663	LE26A05	-733	LE11B16	293	LE11E06	288
	LE24C15	-656	LE25N18	-719	LE7N14	-196	LE11K16	-290	LE24G08	-663	LE12A21	-314
	LE22A15	-609	LE26N06	-749	LE15E19	-412	LE27L21	795	LE11D13	-302	LE11D14	-294
	LE3P24	-79	LE16F18	-453	LE27P11	-797	LE4I18	-100	LE19M21	528	LE13A20	-352
	LE28N13	-821	LE25N18	-719	LE29K01	-827	LE16F13	-460	LE10A11	-259	LE30M01	854
	LE3N24	-75	LE27J01	-792	LE10A11	-259	LE30F05	-869	LE17B07	-481	LE25N18	719
	LE18N13	-520	LE1P09	-29	LE2F02	47	LE6C03	-150	LE6P11	-178	LE31L12	-891
	LE15L08	424	LE11F11	-306	LE7B09	-197	LE18N13	520	LE8A19	206	LE13P11	377
	LE27C02	-769	LE1H08	-14	LE10E16	-267	LE33M19	-937	LE20O17	-555	LE26J07	-759
	LE15L08	-424	LE19M21	-528	LE24E12	661	LE16M01	-440	LE6O06	162	LE21N07	607
	LE10G13	-261	LE14P15	-407	LE2O24	-44	LE26N08	-750	LE9L03	-255	LE26N09	-760
	LE13C24	-354	LE3E12	-65	LE5B03	138	LE19E04	-530	LE30O16	-862	LE24K15	-659
	LE29O16	-835	LE25N18	-719	LE31A13	878	LE14M13	-388	LE29L04	-841	LE23J05	-652
	LE30D03	-867	LE11P03	-312	LE29J18	-840	LE2F23	-53	LE32B03	-919	LE27C02	769
	LE12E24	-326	LE8B10	-220	LE32K06	-910	LE27C02	-769	LE24G08	-663	LE6C12	-158
	LE16D08	-450	LE4J06	-109	LE5F02	-131	LE29L05	-845	LE33G22	-941	LE16P01	-462
	LE26J07	-759	LE14B20	396	LE6H13	-176	LE18D24	-509	LE11D13	-302	LE31B20	-889
	LE6G08	-160	LE28I20	-806	LE11P03	-312	LE28H24	813	LE30M09	855	LE27M17	-767
	LE27C08	-770	LE21B20	-592	LE7N14	-196	LE14B20	-396	LE15E19	-412	LE33G22	-941
	LE19G13	-523	LE1K24	-13	LE15E23	-413	LE27B06	781	LE28K06	-807	LE14G16	-392
	LE7E22	-187	LE32L11	-926	LE24L10	-674	LE27J03	-793	LE12O23	-320	LE6P11	-178
	LE13O15	-350	LE19I19	-525	LE31A10	-884	LE12J04	-332	LE18P14	-514	LE16K04	-444
	LE3E12	-65	LE12E14	-325	LE6G16	-161	LE3N24	-75	LE20C03	-551	LE20K20	561
	LE18D16	-508	LE25N18	-719	LE6G16	-161	LE3I08	-68	LE25H13	-727	LE25E12	-703
	LE3L07	86	LE14M14	-395	LE5L22	-136	LE25D05	-722	LE1G11	2	LE22K20	-616
	LE13K23	-349	LE9G18	-239	LE3D05	-80	LE5I05	-118	LE3N24	-75	LE18E15	-493
	LE2K21	-35	LE28I20	-806	LE13C03	-345	LE13J08	-366	LE27C02	769	LE22N03	626
	LE11L01	-957	LE25N18	-719	LE25A10	-700	LE15A11	-408	LE3L23	88	LE15F07	-430
	LE12K03	-317	LE9O01	-232	LE20I03	-553	LE12F05	-337	LE14M14	-395	LE18J22	-512
	LE27C02	-769	LE21N13	-608	LE21N10	-598	LE21M07	-579	LE15L08	-424	LE11H19	308
	LE21K07	-577	LE6P11	-178	LE23K21	-634	LE8O22	219	LE29K24	833	LE3D05	-80
	LE33C11	-929	LE19I21	-526	LE13L14	-369	LE23E11	-629	LE11M23	-286	LE21I23	-576
	LE25N18	-719	LE15I07	-415	LE25C12	-701	LE20D22	-565	LE27J01	-792	LE24E24	-662
	LE13M10	-361	LE33A03	-928	LE23L18	-646	LE2B22	-45	LE4G22	-99	LE32A17	-899
	LE12E24	-326	LE8P01	-225	LE3L07	-86	LE8B10	-220	LE25D05	-722	LE9O01	-232
	LE5L22	-136	LE28I20	-806	LE23L17	-654	LE11B05	-299	LE21M20	588	LE20C03	551
	LE27L21	-795	LE25N18	-719	LE31M07	-882	LE24L10	-674	LE1P09	-29	LE33G22	-941
	LE25N18	-719	LE25G17	-696	LE4G17	93	LE17J22	-480	LE16F13	-460	LE25E13	-691
	LE6C10	-157	LE6D15	-172	LE32K06	-910	LE16O12	-446	LE7N01	-203	LE9A21	-227
	LE31A11	-877	LE2H02	-48	LE25G23	-697	LE19N09	-547	LE10J17	280	LE15F07	-430
	LE3P08	-76	LE32I04	-909	LE30O02	-860	LE30I22	858	LE20C03	-551	LE16D08	450
	LE32D15	-922	LE8P01	-225	LE10A11	-259	LE32G19	-901	LE11F05	-305	LE29M21	-828
	LE33I24	-943	LE9C11	-230	LE6E19	152	LE12O23	320	LE30B07	866	LE15L08	-424
	LE6B08	-165	LE28O14	-811	LE27L21	795	LE28I20	-806	LE13L14	-369	LE33C20	-939
	LE16M01	-440	LE29I01	-823	LE12N03	-341	LE25B07	720	LE20O17	-555	LE12C23	-316
	LE32F16	-915	LE14C15	-380	LE6P11	-178	LE6C11	-151	LE14N13	-406	LE22K20	-616
	LE26N14	-751	LE17D06	-476	LE22D04	-621	LE29I21	-826	LE15D09	-428	LE21O22	590
	LE30M09	855	LE24O03	-660	LE32A16	-903	LE33H12	-948	LE30M01	854	LE29I21	-826
	LE25N18	-719	LE32B03	-919	LE24F16	-671	LE26N08	-750	LE9K14	-243	LE30M01	854
	LE3P08	-76	LE21F17	-603	LE17L11	-487	LE11L01	-957	LE3P14	-78	LE6M05	-154
	LE24D10	670	LE9C11	-230	LE27B04	-780	LE33E01	-931	LE31A11	-877	LE11D13	-302
	LE33H13	-955	LE1P09	-29	LE11E23	-284	LE31I21	-881	LE13C03	-345	LE25G16	-706
	LE32O02	-913	LE7H09	-200	LE3H15	-83	LE22E07	-611	LE13F06	363	LE17B07	-481
	LE15L08	424	LE29J02	-838	LE6P11	-178	LE14I19	-386	LE33G22	-941	LE23K21	-634
	LE18M17	-498	LE1K24	-13	LE31I21	-881	LE2B22	-45	LE9P23	-258	LE25H13	-727
	LE25G07	-694	LE25N18	-719	LE33F14	-947	LE23L18	-646	LE4K23	94	LE12C23	-316
	LE25E16	-704	LE25N18	-719	LE23N10	-648	LE7N14	-196	LE17M21	-468	LE33G22	-941
	LE20I15	-554	LE4K08	-103	LE4F10	-107	LE25G23	-697	LE7H17	-201	LE17J22	-480
	LE3H15	83	LE2N21	-56	LE5L02	-134	LE27J03	-793	LE1K05	-5	LE30M09	855
	LE18J22	-512	LE20E16	-558	LE26A11	-735	LE9K14	-243	LE31I24	-886	LE27C02	769
	LE3E12	-65	LE25I06	-707	LE27L21	795	LE7D01	-198	LE32B05	-920	LE9C03	-228
	LE16M17	-441	LE18M17	-498	LE14J14	-399	LE25M23	-699	LE10C07	260	LE22K20	616
	LE32M02	-912	LE32C20	-905	LE21L20	-597	LE21F17	-603	LE3D16	-72	LE32N22	-917
	LE5B05	-139	LE8A08	-212	LE26N08	-750	LE17F05	-484	LE24G08	-663	LE25G03	-693
	LE15L08	-424	LE15I14	-420	LE33C06	-938	LE11P21	313	LE6C11	-151	LE15I13	-416
	LE2H02	-48	LE21O22	-590	LE27L21	795	LE1K24	-13	LE30E01	-850	LE32K06	910
	LE11K19	-285	LE18A23	-491	LE12P18	335	LE8G20	-216	LE13F06	363	LE11D14	-294
	LE3H09	-82	LE13M10	-361	LE10E02	-266	LE23L18	-646	LE33A03	-928	LE15L08	-424
	LE13C03	345	LE15D07	427	LE32K06	-910	LE27N10	-788	LE12J04	-332	LE13F23	-373
	LE1P09	-29	LE30P05	-874	LE21K18	-587	LE16K18	445	LE24G08	-663	LE13N01	-375
	LE12K03	-317	LE31I21	-881	LE14P10	-401	LE8A24	-213	LE9N05	-256	LE1H10	-15
	LE25P19	-732	LE30P19	-875	LE3P24	-79	LE25D21	-724	LE7D01	-198	LE27C02	769
	LE19E04	-530	LE2C23	-31	LE26N08	-750	LE9L03	-255	LE13F06	363	LE5M10	128
	LE20K20	-561	LE15D07	427	LE15A11	-408	LE31K20	-888	LE31P23	-897	LE6E22	-159
	LE12O13	-319	LE21P16	-600	LE20C03	-551	LE16D08	450	LE13F06	363	LE27D24	782
	LE26E09	-738	LE25I05	-698	LE15P19	-433	LE29M21	-828	LE4K23	94	LE22M24	-618
	LE8A08	-212	LE24F16	-671	LE23C04	-637	LE7N14	-196	LE15L08	-424	LE19M21	-528
	LE13G02	-357	LE1B07	-26	LE5I22	126	LE31H21	-895	LE27B06	781	LE27G12	773
	LE8P01	-225	LE15B04	-421	LE31D19	-447	LE11H19	-308	LE13O06	-362	LE4F22	-108
	LE15L08	-424	LE17M12	-475	LE8C01	207	LE31H21	-895	LE11E05	-283	LE31N18	-892
	LE12J19	338	LE21F14	594	LE18J22	-512	LE26N06	-749	LE27P11	-797	LE1D23	-27
	LE32O02	-913	LE21F17	-603	LE24O03	-660	LE2C24	-39	LE2H02	-48	LE21O22	-590
	LE4I18	-100	LE19E04	-530	LE15M15	-418	LE10E16	-267	LE5M13	-121	LE11M23	-286
	LE11F05	-305	LE32F16	-915	LE2C23	-31	LE8C23	-210	LE15G13	-414	LE23M07	635
	LE3P24	-79	LE4O08	-105	LE7N03	-204	LE13F23	-373	LE8O20	-218	LE1P20	-24
	LE4K08	-103	LE27J08	-786	LE11D13	-302	LE13C03	-345	LE18J22	-512	LE12C13	315
	LE18C20	-500	LE33B19	-954	LE29J18	-840	LE9B09	-251	LE31K16	-887	LE13F06	363
	LE31M07	-882	LE21O22	590	LE9P17	-257	LE7N14	-196	LE12E24	-326	LE4J06	-109
	LE11E05	-283	LE31N18	-892	LE15B04	-421	LE11E06	-288	LE30G05	-852	LE1K21	-6
	LE15E19	-412	LE23E09	-628	LE10A11	-259	LE14M21	-389	LE7I21	-179	LE33G22	-941
	LE1P09	-29	LE13E20	-355	LE26N08	-750	LE24B21	-681	LE27C02	769	LE23K24	642
	LE9E04	236	LE1K24	-13	LE21O22	-590	LE25E05	-690	LE24F03	682	LE11H19	-308
	LE33I24	-943	LE9P23	-258	LE9F04	-246	LE31I24	886	LE21I20	-586	LE33C06	-938
	LE5M13	-121	LE6B23	-171	LE18G12	-502	LE25E05	-690	LE19K01	-527	LE3C14	-64
	LE25E05	-690	LE5M10	-128	LE26A09	-734	LE2C24	-39	LE27C02	769	LE16D21	459
	LE30E01	850	LE20I22	-559	LE12J21	-339	LE26N08	-750	LE18J22	-512	LE20E16	-558
	LE26F06	-748	LE25N18	-719	LE13B05	-372	LE11P03	-312	LE30E17	-851	LE5C21	-116
	LE7D01	198	LE15L08	424	LE4N21	-115	LE31A13	878	LE12C13	315	LE25F07	-726
	LE27D24	-782	LE15N24	-426	LE14C15	-380	LE1G11	2	LE24N20	-675	LE15M07	417
	LE33M19	-937	LE3M18	-69	LE25N18	-719	LE27F04	-783	LE1K05	-5	LE22K20	-616
	LE12J16	-334	LE5B03	-138	LE4M17	-95	LE7N14	-196	LE8L19	-224	LE14D10	397
	LE20F18	567	LE8G20	-216	LE27B06	-781	LE11P21	313	LE25D05	-722	LE10G13	-261
	LE11K19	-285	LE27I24	-774	LE27J03	-793	LE10A11	-259	LE13J08	-366	LE9E08	-237
	LE4F10	-107	LE25G23	-697	LE27O11	-768	LE16G02	-443	LE24G08	663	LE20F11	-570
	LE11K16	-290	LE27C02	-769	LE22B22	-619	LE27J01	-792	LE18D24	-509	LE4N21	-115
	LE4N21	-115	LE2D19	-49	LE10A11	-259	LE20D22	-565	LE33G22	-941	LE8I04	-217
	LE16C04	-442	LE3E12	-65	LE30D03	-867	LE11P03	-312	LE15D07	427	LE13A20	-352
	LE3M18	69	LE13M10	-361	LE25M23	-699	LE33E05	-932	LE31L12	-891	LE29L04	-841
	LE26N13	-761	LE33B09	-953	LE13E24	-356	LE23L18	-646	LE10D07	-278	LE27C02	769
	LE19E04	-530	LE29I21	-826	LE25D05	-722	LE6F07	-173	LE22L17	-625	LE28H24	813
	LE23K03	-632	LE15L08	-424	LE5H14	-133	LE12C24	-323	LE31A11	-877	LE19D04	538
	LE1B05	25	LE20C03	551	LE33M19	-937	LE16D21	-459	LE7H17	-201	LE20L16	-569
	LE27J03	-793	LE10A11	-259	LE32A17	-899	LE14E03	-381	LE20D22	-565	LE14B20	-396
	LE32C12	-904	LE21B20	-592	LE11F05	-305	LE19D24	-539	LE33G22	-941	LE33G22	-941
	LE25G16	-706	LE27E06	-772	LE15P19	-433	LE22L17	-625	LE25D23	-725	LE15M07	417
	LE31L12	-891	LE17L11	-487	LE14B20	-396	LE3N24	-75	LE12O23	-320	LE11D13	-302
	LE17K22	-474	LE19E04	-530	LE17K20	-473	LE31I21	-881	LE26A11	735	LE23E07	-627
	LE5M13	-121	LE13G02	-357	LE9C07	-229	LE27L21	795	LE2F02	-47	LE20D22	-565
	LE2F01	-51	LE7E18	-186	LE18F04	-510	LE33I24	-943	LE6P11	-178	LE23K13	-633
	LE11K19	-285	LE9E04	-236	LE32D15	-922	LE21L20	-597	LE15L08	-424	LE14D10	-397
	LE23E09	-628	LE18D16	-508	LE18D16	-508	LE29M21	-828	LE30E17	-851	LE27J22	-787
	LE29M08	834	LE14G22	393	LE18D16	-508	LE4K06	-102	LE24G08	-663	LE2B22	-45
	LE25A10	-700	LE9G18	-239	LE13H22	-365	LE19I21	-526	LE14G16	-392	LE30E01	-850
	LE11K19	-285	LE26P06	-753	LE6M05	-154	LE27J03	-793	LE27E11	-765	LE15L08	-424
	LE3P08	-76	LE14E20	-391	LE12E24	-326	LE26N08	-750	LE6O06	-162	LE2B22	-45
	LE25J21	-730	LE29P24	-842	LE6P11	-178	LE18G02	-501	LE1G11	-2	LE16C03	-436
	LE7I21	-179	LE22M24	-618	LE15F07	-430	LE13C03	-345	LE13J08	-366	LE14D15	-404
	LE33F10	-946	LE15L08	-424	LE15A11	-408	LE9B09	-251	LE8E05	-211	LE1P20	-24
	LE19E04	-530	LE30E01	850	LE14G16	-392	LE16D21	-459	LE16N07	-461	LE13O06	-362
	LE24P24	679	LE6P11	178	LE24I15	-658	LE32K06	-910	LE18D24	-509	LE19I19	525
	LE20F18	567	LE1I11	-4	LE15L08	-424	LE18F04	-510	LE29O16	-835	LE25N18	-719
	LE2K22	-43	LE33J10	950	LE31H21	-895	LE22G01	612	LE25N18	-719	LE18P06	513
	LE19I21	-526	LE25E05	-690	LE10A11	-259	LE26N13	-761	LE33G22	-941	LE2C08	-38
	LE30K12	-859	LE23E09	-628	LE19K01	-527	LE3C14	-64	LE24G08	-663	LE18F15	-517
	LE25N18	-719	LE22M19	-613	LE5H14	-133	LE33C06	-938	LE20D22	-565	LE28K08	-808
	LE4N21	-115	LE4K08	-103	LE16O12	-446	LE33E01	-931	LE25M02	709	LE25N18	-719
	LE15D07	427	LE7D01	198	LE29M21	-828	LE5F02	-131	LE21P10	-599	LE33G22	-941
	LE27F04	-783	LE6C10	-157	LE13O15	-350	LE19I19	-525	LE24G08	-663	LE12O13	-319
	LE27M24	-778	LE25N18	-719	LE23O09	-636	LE21K07	-577	LE23L17	-654	LE31N18	-892
	LE9K05	-231	LE11I02	-289	LE25A10	-700	LE26N08	-750	LE27K18	-776	LE12F05	337
	LE12J16	-334	LE32G19	-901	LE9H08	248	LE33I02	-942	LE11H20	-296	LE24G08	-663
	LE27C02	-769	LE30G05	-852	LE16F13	-460	LE30I06	-857	LE7H17	-201	LE29N13	-848
	LE2K11	-34	LE9F15	-254	LE10A16	-264	LE33C20	-939	LE7N01	-203	LE27K16	-775
	LE4B21	-113	LE20D22	-565	LE29K01	-827	LE7N14	-196	LE13O06	-362	LE18O22	-506
	LE5D08	-130	LE17D06	-476	LE18C20	-500	LE24G08	-663	LE30M01	854	LE7L24	195
	LE9L22	-250	LE15G13	-414	LE26N08	-750	LE1P09	-29	LE11O14	-292	LE15L08	-424
	LE33M19	-937	LE12C24	-323	LE15A11	-408	LE14N13	-406	LE27C02	-769	LE24H22	673
	LE6O06	-162	LE29N03	-847	LE13A05	-343	LE5M10	-128	LE29M21	-828	LE6G08	-160
	LE21O23	-581	LE12J21	-339	LE19H20	-540	LE3N24	-75	LE7M09	-181	LE4G22	-99
	LE3P24	-79	LE13O19	-351	LE14A11	-379	LE11P03	-312	LE6C11	-151	LE32F16	-915
	LE2C24	-39	LE25D23	-725	LE19N09	-547	LE13P17	-378	LE9L03	255	LE21N07	607
	LE11J16	-297	LE7E22	-187	LE16F18	-453	LE33M04	945	LE3M09	-62	LE14P15	407
	LE33M19	-937	LE24D10	-670	LE25G03	-693	LE33H12	-948	LE24K15	-659	LE2O24	-44
	LE32I04	-909	LE28I20	-806	LE12O23	320	LE6M11	-155	LE13H22	-365	LE15I07	415
	LE17L11	-487	LE24O03	-660	LE11E05	-283	LE2C24	-39	LE13K13	-348	LE27C02	-769
	LE3E12	-65	LE32K20	-911	LE31H21	-895	LE32C20	905	LE21K18	-587	LE17D17	-483
	LE26B11	-755	LE23E09	-628	LE28O14	-811	LE12O23	320	LE6P11	-178	LE31D04	-890
	LE22A15	-609	LE22K20	-616	LE27K16	775	LE27O24	779	LE12P18	-335	LE4K23	94
	LE21O23	-581	LE12O13	-319	LE33G09	-933	LE27K18	-776	LE22K20	-616	LE26A11	-735
	LE1I11	-4	LE6P11	-178	LE4M10	-104	LE25N18	-719	LE23C14	639	LE30M01	854
	LE20K08	-560	LE1K21	-6	LE9A21	-227	LE12P18	335	LE27J01	-792	LE19H20	-540
	LE8C21	-209	LE6F07	-173	LE12J12	-333	LE23L18	-646	LE25P19	-732	LE11D13	-302
	LE15D07	427	LE5P17	148	LE33C20	-939	LE30P05	-874	LE27C02	769	LE3A07	57
	LE10B06	275	LE21J01	604	LE3E12	-65	LE33M04	945	LE18G02	-501	LE13F06	363
	LE6M05	-154	LE19I21	-526	LE26P06	-753	LE27J08	-786	LE11D13	-302	LE25J21	-730
	LE1P09	-29	LE30O16	-862	LE10O01	-263	LE29M21	-828	LE11P21	-313	LE27C02	769
	LE3P08	-76	LE25C12	-701	LE25B15	-721	LE33M19	-937	LE4N21	-115	LE31A13	878
	LE23J03	-651	LE7N01	-203	LE19I21	-526	LE32B03	-919	LE18D24	-509	LE3P14	-78
	LE12J16	-334	LE21O12	-589	LE22E07	-611	LE12J16	-334	LE21K18	-587	LE7E18	-186
	LE18J22	-512	LE9C07	-229	LE25D05	-722	LE15P19	-433	LE27C15	763	LE1H12	16
	LE18D16	-508	LE9K14	-243	LE8B10	-220	LE19I21	-526	LE25E08	702	LE30M01	854
	LE14M13	-388	LE14D10	-397	LE9K05	-231	LE31I24	886	LE6G08	-160	LE20I22	-559
	LE10G13	-261	LE2H02	-48	LE33G20	-940	LE14J12	-398	LE20I22	-559	LE29D09	-843
	LE12J16	-334	LE23F05	-650	LE29B16	-836	LE11N11	-309	LE33M05	935	LE33B19	-954
	LE21F17	-603	LE9E10	-238	LE11H08	-295	LE2C24	-39	LE27I24	-774	LE22K20	-616
	LE24D10	-670	LE12J19	338	LE17C15	-463	LE24P06	-677	LE17I11	-466	LE11F05	-305
	LE14M13	-388	LE17A06	-469	LE31I21	-881	LE30A07	-849	LE13I24	-360	LE22L17	625
	LE33J10	950	LE30K11	-853	LE18J22	-512	LE9C07	-229	LE17D17	-483	LE4K23	94
	LE3E12	-65	LE14E10	-390	LE15H16	-422	LE14E03	-381	LE2K11	34	LE27C02	769
	LE21O01	-580	LE18J22	-512	LE17C15	-463	LE11D01	-301	LE33B19	954	LE11H19	-308
	LE12J16	-334	LE3L23	-88	LE28O04	-810	LE23L18	-646	LE14P15	-407	LE15L08	-424
	LE6G16	-161	LE3N24	-75	LE27M17	-767	LE32K06	-910	LE19N09	-547	LE30M01	854
	LE5B05	-139	LE25A03	-686	LE20H18	-568	LE25G09	-695	LE11B05	-299	LE7H17	-201
	LE33C13	-930	LE20D22	-565	LE31A10	-884	LE8L19	-224	LE7N01	-203	LE27H15	-791
	LE8A08	-212	LE10O22	-274	LE31I21	-881	LE11E05	-283	LE25J21	-730	LE27C02	769
	LE11D13	-302	LE13C03	-345	LE27H15	-791	LE6O06	-162	LE18J22	-512	LE1C17	-1
	LE2H02	-48	LE12J19	-338	LE11P03	-312	LE25E12	-703	LE27J01	-792	LE17H01	-485
	LE15E11	-411	LE20D22	-565	LE11B16	293	LE11E06	288	LE29L11	-846	LE32A17	-899
	LE3E12	-65	LE4L20	-111	LE3N24	-75	LE20K20	-561	LE9C03	-228	LE6B08	-165
	LE29O13	-829	LE33I24	-943	LE31L12	-891	LE17L11	-487	LE27C02	769	LE27C24	-771
	LE14D15	-404	LE9M18	-244	LE12K03	-317	LE31I21	-881	LE22K20	-616	LE23E07	-627
	LE3E21	-60	LE8A24	-213	LE13C03	-345	LE10I12	-268	LE6P11	-178	LE14I19	-386
	LE15L08	-424	LE25E08	-702	LE17I11	-466	LE21L20	-597	LE11K19	-285	LE1G15	-3
	LE19D04	-538	LE15E19	-412	LE13P17	-378	LE18F04	-510	LE6P11	-178	LE18G02	-501
	LE13C15	-346	LE21O23	-581	LE17B07	-481	LE11D13	-302	LE11E05	-283	LE2C24	-39
	LE19E04	-530	LE23K03	-632	LE33C06	-938	LE11F03	-304	LE6D12	-166	LE21L20	-597
	LE14D15	-404	LE11H20	-296	LE30P05	874	LE5C21	-116	LE28L05	-820	LE12E14	-325
	LE21P16	-600	LE31M07	-882	LE32L11	-926	LE2C24	-39	LE3B16	-71	LE24G08	-663
	LE7N01	-203	LE18P06	-513	LE8C21	-209	LE12C23	-316	LE19I14	535	LE30M01	854
	LE20I03	-553	LE33A03	-928	LE2C24	-39	LE32C12	-904	LE28K14	-809	LE7I20	-192
	LE12E24	-326	LE10E16	-267	LE15E19	-412	LE14E03	-381	LE25C12	-701	LE20D22	-565
	LE1K20	-12	LE9M18	-244	LE11D13	-302	LE11E06	-288	LE12A21	-314	LE11M23	-286
	LE17G07	-465	LE16C04	442	LE12E24	-326	LE29J18	-840	LE25E05	-690	LE31D04	-890
	LE11K19	-285	LE23J18	-645	LE11H20	-296	LE32H01	-923	LE9K05	-231	LE12E14	-325
	LE33M05	-935	LE23E09	-628	LE17D06	-476	LE26N08	-750	LE16D22	452	LE32A16	-903
	LE6G16	-161	LE3I08	-68	LE3C14	-64	LE13L14	-369	LE11D01	-301	LE25B15	-721
	LE7J11	-202	LE33B09	-953	LE15E23	-413	LE26N08	-750	LE5I22	126	LE27C02	769
	LE25L14	-717	LE15L08	-424	LE33G09	-933	LE14L20	-400	LE19K24	-537	LE16K04	-444
	LE14P15	-407	LE25N18	-719	LE16K04	-444	LE18C20	-500	LE11E05	-283	LE13O06	-362
	LE11O14	-292	LE15L08	-424	LE7L20	-438	LE7N14	-196	LE20E07	552	LE22L17	625
	LE22D04	-621	LE25L02	-716	LE27C02	-769	LE1H08	-14	LE27J01	-792	LE20O17	-555
	LE6H08	-168	LE19G13	-523	LE25H18	-713	LE33I02	-942	LE22L17	625	LE29I21	-826
	LE26P06	-753	LE1H20	-17	LE11H19	-308	LE27F04	-783	LE4N21	-115	LE27F11	-789
	LE32K06	-910	LE27C02	-769	LE30K11	-853	LE12J12	333	LE14J03	405	LE26N21	-762
	LE16D21	-459	LE20D22	-565	LE32K06	-910	LE30E17	-851	LE11A10	287	LE17H01	-485
	LE27P11	-797	LE18P14	-514	LE6D12	-166	LE21L20	-597	LE2C24	-39	LE18P14	514
	LE32O17	-902	LE7E22	-187	LE20F11	-570	LE6P11	-178	LE10I24	-269	LE6P11	-178
	LE12J16	-334	LE16B20	-448	LE20K08	-560	LE1K21	-6	LE9L22	-250	LE20I22	-559
	LE7H17	-201	LE9F04	-246	LE11L01	-957	LE24O03	-660	LE23L17	-654	LE17I11	-466
	LE25M23	-699	LE13C06	-353	LE5H14	-133	LE23J18	-645	LE30F05	-869	LE6P11	-178
	LE14B20	396	LE21J01	604	LE6O06	-162	LE2B22	-45	LE7E18	186	LE27C02	769
	LE22K20	616	LE25I05	698	LE17G02	-471	LE8C23	-210	LE12J04	-332	LE10O10	-272
	LE18N03	-519	LE30M09	855	LE8A19	-206	LE25A03	-686	LE5I05	-118	LE7N01	-203
	LE16C03	-436	LE33C20	-939	LE12O23	320	LE20C03	-551	LE15G13	-414	LE6O06	162
	LE3E12	-65	LE11D01	-301	LE7L20	-438	LE23L18	-646	LE25E16	704	LE19K24	-537
	LE27J03	-793	LE29N13	-848	LE24G08	-663	LE29I07	-824	LE27C02	769	LE17G02	471
	LE6C11	-151	LE18C20	-500	LE6P11	-178	LE21O12	-589	LE6P11	-178	LE6E19	152
	LE26P06	-753	LE4N07	-114	LE27P11	-797	LE12C13	-315	LE21J10	-595	LE11D13	-302
	LE2C24	-39	LE7I10	-191	LE12L13	-340	LE14P10	-401	LE22L17	625	LE4I18	-100
	LE24F15	-683	LE13M10	-361	LE16B20	-448	LE13C03	-345	LE22A15	-609	LE26N06	-749
	LE17E17	-464	LE13M10	-361	LE26E05	-737	LE29C10	831	LE33G22	-941	LE25J09	-728
	LE6B08	-165	LE21B08	-591	LE11H19	-308	LE29J02	838	LE33M05	-935	LE31L12	891
	LE33E01	-931	LE17E17	-464	LE24B21	-681	LE29P24	-842	LE8A19	206	LE14J14	-399
	LE10H23	-279	LE15L08	-424	LE2O19	36	LE26N13	-761	LE23L18	-646	LE2B22	-45
	LE24I15	-658	LE27F04	-783	LE22M06	-617	LE13C03	-345	LE30M09	855	LE2O24	-44
	LE15L08	424	LE25G03	-693	LE15G24	-419	LE17I11	-466	LE31C07	-879	LE17L11	-487
	LE4E05	-92	LE25C11	-687	LE6O06	-162	LE19L21	-546	LE16N07	-461	LE24G08	-663
	LE24E24	-662	LE15F07	-430	LE13A05	-343	LE27C08	-770	LE21F14	-594	LE13F23	-373
	LE33M19	-937	LE29N13	-848	LE9C07	-229	LE2C23	-31	LE18O22	506	LE13F23	373
	LE30M09	855	LE18F22	511	LE2C24	-39	LE7I10	-191	LE6G23	-153	LE7N03	204
	LE33J10	950	LE16D08	-450	LE2C24	-39	LE25D23	-725	LE16A03	-434	LE20I22	-559
	LE25H13	-727	LE25E12	-703	LE23C04	-637	LE31I21	-881	LE22K20	-616	LE12L14	-624
	LE25C11	-687	LE32D15	-922	LE4I18	-100	LE2C24	-39	LE30I06	857	LE26B11	755
	LE25K18	-708	LE20F18	567	LE22M19	-613	LE33M04	945	LE25B15	-721	LE33M19	-937
	LE14M13	-388	LE26P02	-752	LE16C03	-436	LE33C20	-939	LE25M23	-699	LE4B21	-113
	LE13G02	-357	LE25G09	-695	LE21M20	588	LE20C03	551	LE8G20	-216	LE4N21	-115
	LE3J17	-84	LE26A05	-733	LE26M09	741	LE32B05	-920	LE20E07	-552	LE25E21	-692
	LE5B03	-138	LE7E22	-187	LE30L15	-873	LE1J12	19	LE31C19	-880	LE9O01	-232
	LE25D05	-722	LE10G13	-261	LE7D01	-198	LE12P18	335	LE11D13	-302	LE5E12	-123
	LE19H20	-540	LE32D15	-922	LE30K11	-853	LE11L01	-957	LE24G08	-663	LE14N13	-406
	LE23E09	-628	LE29N13	-848	LE20O17	-555	LE32K06	-910	LE33G09	-933	LE12E14	-325
	LE7E22	-187	LE19M21	-528	LE13A05	-343	LE22K20	-616	LE24G08	-663	LE25G02	-705
	LE23M14	-643	LE6C10	-157	LE15E11	-411	LE32C12	-904	LE27C02	769	LE6N14	-170
	LE16P01	462	LE30J13	872	LE20F06	-566	LE25N10	-718	LE17I11	-466	LE20F18	567
	LE29K24	-833	LE17F05	-484	LE6O06	-162	LE17K22	-474	LE9E04	-236	LE25M23	-699
	LE16I17	-439	LE7E22	-187	LE25B15	-721	LE13G13	-347	LE15J04	-423	LE11D13	-302
	LE15L08	-424	LE11E05	283	LE3I05	-61	LE22M24	-618	LE22L17	625	LE8O22	219
	LE33J18	-951	LE25N18	-719	LE5A24	-122	LE33A03	928	LE18J22	-512	LE5L20	-135
	LE25G02	-705	LE11K16	290	LE32H12	-916	LE29M21	-828	LE22K20	-616	LE24N20	-675
	LE12J16	-334	LE11E23	-284	LE15B04	-421	LE14E10	-390	LE26E05	-737	LE33M05	935
	LE33C06	-938	LE16C04	-442	LE11D14	-294	LE14J12	-398	LE15L08	-424	LE11B16	-293
	LE29K01	-827	LE12J16	-334	LE5H14	-133	LE11C07	-282	LE21C14	-583	LE3N24	-75
	LE31C19	-880	LE9O01	-232	LE18I01	-494	LE26N08	-750	LE6O06	162	LE4A17	-90
	LE7E22	-187	LE12A21	-314	LE13P17	-378	LE8G20	-216	LE7N03	-204	LE30M01	854
	LE27E11	-765	LE14M13	-388	LE11E06	-288	LE3I05	-61	LE16K04	-444	LE18C20	-500
	LE1K20	-12	LE2K01	-33	LE14E03	-381	LE20I03	-553	LE27C02	769	LE7H09	200
	LE33G09	-933	LE14L20	-400	LE26C10	-743	LE13C03	-345	LE21P10	-599	LE27C02	769
	LE11D14	-294	LE14J12	-398	LE8F06	-221	LE23L18	-646	LE6B08	-165	LE19D04	538
	LE8A24	-213	LE10E02	-266	LE13N01	-375	LE25B15	-721	LE23D06	-644	LE28K06	-807
	LE27E06	-772	LE27J01	-792	LE9A21	-227	LE17K22	-474	LE12J12	-333	LE11M23	-286
	LE33G20	-940	LE14J12	-398	LE6O14	-164	LE33C20	-939	LE15L08	-424	LE19C20	-529
	LE3E12	-65	LE25M23	-699	LE29F23	-844	LE25D05	-722	LE8C21	-209	LE2E10	-41
	LE9F15	-254	LE15E19	-412	LE17K05	-467	LE26N08	-750	LE11N11	-309	LE5M04	-127
	LE25G17	-696	LE12J16	-334	LE9A21	-227	LE24F03	-682	LE20I15	-554	LE32O02	-913
	LE11F05	-305	LE25H13	-727	LE31I21	-881	LE26M09	-741	LE30M01	854	LE6H11	175
	LE13F23	373	LE8A08	212	LE6C11	-151	LE18C20	-500	LE29F23	-844	LE24G08	-663
	LE11P03	-312	LE32O02	-913	LE26E20	-744	LE9A21	-227	LE15L08	-424	LE9A21	-227
	LE3L07	-86	LE1I11	-4	LE6P11	-178	LE6E19	152	LE28L05	-820	LE19E04	-530
	LE27L21	-795	LE12J16	-334	LE3M09	-62	LE21J17	-606	LE18M21	-499	LE3B16	71
	LE11C07	-282	LE9O01	-232	LE29I13	-825	LE14G07	383	LE12J16	-334	LE30E01	-850
	LE14M13	-388	LE30L15	-873	LE25L14	-717	LE6O06	-162	LE30M09	855	LE24O03	-660
	LE3P24	-79	LE31I24	-886	LE19J10	542	LE32D10	914	LE18D24	-509	LE4N07	-114
	LE16A03	-434	LE20I22	-559	LE6C11	-151	LE18B07	-515	LE17J22	-480	LE20I22	-559
	LE28L12	-814	LE18C20	-500	LE33H13	-955	LE31I21	-881	LE24C15	-656	LE28J07	-819
	LE27N13	-796	LE18F15	-517	LE12K22	-328	LE27C02	-769	LE24F16	-671	LE24H01	-684
	LE25N18	-719	LE4I20	-101	LE29M21	-828	LE4I18	-100	LE6H11	-175	LE8C21	-209
	LE33C20	-939	LE30P05	-874	LE20N03	-572	LE31I21	-881	LE24G08	-663	LE15E19	-412
	LE5L20	-135	LE25H13	-727	LE25D05	-722	LE10G13	-261	LE27J01	-792	LE3P24	-79
	LE15L08	424	LE21M07	579	LE33H12	-948	LE26A09	-734	LE13O15	-350	LE19I19	-525
	LE16D22	-452	LE6B08	-165	LE25B15	-721	LE30K11	-853	LE30M09	855	LE3P14	-78
	LE25J17	-729	LE3P08	-76	LE13N05	-376	LE21L20	-597	LE31A13	878	LE24F03	682
	LE27E06	-772	LE2F02	-47	LE19G23	-524	LE23L18	-646	LE1P20	24	LE1P20	-24
	LE7E22	-187	LE23E23	-631	LE6O06	-162	LE17B07	-481	LE13L10	-368	LE3M09	-62
	LE16F13	-460	LE25E13	-691	LE2B22	-45	LE9A21	-227	LE32K20	-911	LE4K06	-102
	LE12J16	-334	LE24I15	-658	LE30F05	-869	LE6P11	-178	LE13C03	-345	LE8H10	-222
	LE31I21	-881	LE11E05	-283	LE5H14	-133	LE7K13	-180	LE3P12	-77	LE10G13	-261
	LE16A13	-435	LE9C07	-229	LE22M06	-617	LE25D05	-722	LE15L08	-424	LE17M12	-475
	LE5B23	-140	LE32E20	-908	LE29P24	-842	LE11N13	-310	LE30E01	-850	LE30E17	-851
	LE13M10	-361	LE32P14	-918	LE6C11	-151	LE8C21	-209	LE4M10	-104	LE15L08	-424
	LE26N21	-762	LE26P24	-754	LE25N18	-719	LE33B19	-954	LE15P19	-433	LE22L17	-625
	LE32H01	-923	LE23L18	-646	LE27P11	-797	LE1D23	-27	LE27N10	788	LE24K15	-659
	LE31K16	-887	LE29L05	845	LE2C24	-39	LE20K24	-562	LE31N18	-892	LE10I12	-268
	LE5L13	-146	LE18J22	-512	LE3L07	-86	LE22D04	-621	LE10G13	-261	LE14P15	-407
	LE23E09	-628	LE21K09	-578	LE6M05	-154	LE2C24	-39	LE12J12	-333	LE13L14	-369
	LE6C10	-157	LE3N01	-89	LE20I03	-553	LE26N21	-762	LE32O17	-902	LE6P11	-178
	LE33B09	953	LE2C24	39	LE6O06	-162	LE18N13	-520	LE19G23	-524	LE22K20	-616
	LE15C13	-410	LE13M10	-361	LE15E23	-413	LE19N09	-547	LE5L09	-145	LE8G20	-216
	LE28C20	-803	LE31O17	-883	LE12J16	-334	LE6A23	-149	LE17F05	-484	LE13L14	-369
	LE18F22	511	LE15L08	424	LE31I21	-881	LE14P10	-401	LE1J04	-18	LE29F23	-844
	LE3G06	-66	LE14M13	-388	LE21I20	-586	LE12P18	335	LE1K05	-5	LE15D07	-427
	LE22N03	-626	LE25A03	-686	LE12O23	-320	LE6P11	-178	LE32K20	-911	LE12M01	-318
	LE14C15	-380	LE15L08	-424	LE17L11	-487	LE24O03	-660	LE2K11	-34	LE14G16	-392
	LE18D24	-509	LE3P14	-78	LE19L21	-546	LE13C03	345	LE11H08	-295	LE22K20	-616
	LE11N13	-310	LE15E19	-412	LE24B21	-681	LE27C02	-769	LE24G08	663	LE9G18	-239
	LE3H15	-83	LE33I24	-943	LE12J21	-339	LE2C23	-31	LE33C20	-939	LE25M23	-699
	LE18J22	-512	LE7A04	-183	LE29J18	-840	LE31K16	-887	LE13O06	-362	LE21I20	-586
	LE25J18	-715	LE5L02	-134	LE5H14	-133	LE5M10	-128	LE4G22	-99	LE32C12	-904
	LE2C24	-39	LE25C12	-701	LE20I15	-554	LE11F05	-305	LE2K01	-33	LE31K16	-887
	LE14M13	-388	LE23C14	-639	LE1P09	-29	LE2C23	-31	LE21K07	-577	LE6P11	-178
	LE20D22	-565	LE29O17	-830	LE19G02	-531	LE9A21	-227	LE20K20	-561	LE18D24	-509
	LE27E06	-772	LE15M07	-417	LE1H12	-16	LE8C21	-209	LE33I24	-943	LE23D07	-649
	LE25N18	-719	LE31A03	-876	LE32K06	-910	LE23M14	-643	LE7I20	-192	LE11B13	-300
	LE20I15	-554	LE11F05	-305	LE25E05	-690	LE31D04	-890	LE20I22	-559	LE6B08	-165
	LE23E19	-630	LE19E04	-530	LE6P11	-178	LE31L12	-891	LE26E09	738	LE10M13	262
	LE31H03	-894	LE17J22	-480	LE20D22	-565	LE28K08	-808	LE14J03	405	LE30M01	854
	LE26E20	-744	LE15L08	-424	LE27O11	-768	LE15D09	-428	LE12P11	342	LE29E13	822
	LE27I24	-774	LE12J16	-334	LE6C11	-151	LE23N05	-655	LE9A14	-234	LE28I20	-806
	LE29B16	-836	LE8A24	-213	LE32A13	-898	LE9A21	-227	LE26N14	-751	LE10G13	-261
	LE31C07	-879	LE11K19	-285	LE31I24	886	LE12O23	-320	LE26C10	-743	LE13C03	-345
	LE6P11	-178	LE14I19	-386	LE22M06	-617	LE6O06	-162	LE3H15	-83	LE22E07	-611
	LE7K13	180	LE3N24	-75	LE1K18	11	LE25C12	701	LE32K20	-911	LE1J12	-19
	LE9N05	-256	LE1H10	-15	LE3D13	-81	LE25D05	-722	LE13C03	-345	LE5P12	-137
	LE28K06	-807	LE14G16	-392	LE18N03	-519	LE19N09	-547	LE26N09	-760	LE20I15	-554
	LE24O03	-660	LE2C24	-39	LE19I12	-534	LE9K14	-243	LE31G20	-885	LE13O06	-362
	LE18J22	-512	LE5L20	-135	LE6O06	-162	LE29N03	-847	LE3L07	86	LE15F07	-430
	LE10J17	280	LE25G03	-693	LE23L18	-646	LE29J10	-839	LE4L04	-110	LE4E05	92
	LE11E23	-284	LE20I03	-553	LE7G02	-188	LE18D24	-509	LE19I21	-526	LE18F22	511
	LE24E24	-662	LE7N01	-203	LE5H14	-133	LE21J17	-606	LE30M09	855	LE28K08	-808
	LE17C15	-463	LE10E16	-267	LE29I13	-825	LE15B04	-421	LE1G11	-2	LE30M09	855
	LE24K14	-666	LE25I05	-698	LE3P14	-78	LE6M05	-154	LE11C07	-282	LE9O01	-232
	LE2H02	-48	LE7C04	-185	LE24G10	-664	LE6A23	-149	LE24P02	676	LE24H07	685
	LE7E22	-187	LE11N13	-310	LE15H16	-422	LE19N09	-547	LE15I07	-415	LE32K20	-911
	LE32N22	-917	LE23C06	-638	LE26F02	-747	LE29M21	-828	LE33I24	-943	LE26H01	-757
	LE25H18	-713	LE17D06	-476	LE13P17	-378	LE25N10	-718	LE4C09	-91	LE9O01	-232
	LE15G13	-414	LE28O04	-810	LE11N21	-311	LE5L02	-134	LE27E06	-772	LE27J01	-792
	LE33I24	-943	LE25E13	-691	LE13C03	-345	LE25G16	-706	LE24K20	-667	LE12J16	-334
	LE18I01	-494	LE5D08	-130	LE28G20	-805	LE25B15	-721	LE21O12	-589	LE27C02	-769
	LE17B07	-481	LE11D13	-302	LE24F16	-671	LE4F10	-107	LE10G13	-261	LE26F02	-747
	LE20C03	-551	LE7E22	-187	LE9A21	-227	LE24G11	-657	LE20F18	567	LE32D15	-922
	LE3E12	-65	LE13K23	-349	LE23L18	-646	LE15N24	-426	LE13G16	-359	LE15L08	-424
	LE14E03	-381	LE5A24	-122	LE27O11	-768	LE11F05	-305	LE27B04	-780	LE18E15	-493
	LE24P16	-678	LE12J16	-334	LE19N09	-547	LE24F16	-671	LE28H24	813	LE4N21	-115
	LE1K05	-5	LE30M09	855	LE28L12	-814	LE13C03	-345	LE22L17	625	LE29I01	-823
	LE1P09	-29	LE13I24	-360	LE27D24	-782	LE20I22	-559	LE11D13	-302	LE1H20	-17
	LE25G07	-694	LE13M10	-361	LE5N23	-147	LE1I11	-4	LE7L20	438	LE27C02	769
	LE18J22	-512	LE9K02	-242	LE18D16	-508	LE33H12	-948	LE31B20	-889	LE29E13	-822
	LE18M17	-498	LE15D07	-427	LE17F05	-484	LE13F20	-364	LE9K14	-243	LE4N07	-114
	LE5I05	-118	LE2O23	37	LE12P18	335	LE28K14	-809	LE29K04	-832	LE30M09	855
	LE24F16	-671	LE19J10	-542	LE27F11	-789	LE26N08	-750	LE13L14	-369	LE33J04	-949
	LE21J03	-605	LE12J16	-334	LE6N14	-170	LE9K14	-243	LE15I07	415	LE26C07	736
	LE1I11	-4	LE26N06	-749	LE9A21	-227	LE8I04	-217	LE23K03	632	LE29M21	-828
	LE9O01	-232	LE25F02	-712	LE15B04	-421	LE9D08	-245	LE28J07	-819	LE24G08	663
	LE13O15	-350	LE1P20	-24	LE29I07	-824	LE15N24	-426	LE32F16	-915	LE2O23	-37
	LE12J16	-334	LE5B23	-140	LE13F20	-364	LE3E12	-65	LE3E07	-58	LE22K20	-616
	LE9M18	-244	LE24K14	-666	LE14N13	-406	LE14E03	-381	LE15I13	-416	LE30M01	854
	LE9E04	-236	LE25M23	-699	LE9A21	-227	LE3E13	-59	LE21K07	577	LE10P06	-276
	LE16G02	443	LE20I22	-559	LE14G11	-384	LE27N10	-788	LE15M07	417	LE24F16	-671
	LE9G18	-239	LE1I24	-9	LE6C11	-151	LE32F16	-915	LE31I21	-881	LE2B22	-45
	LE25D21	-724	LE8P01	-225	LE21D21	-602	LE27C02	-769	LE22L17	625	LE11N11	309
	LE24F16	-671	LE16D22	-452	LE20I03	-553	LE33A03	-928	LE28G20	-805	LE22K20	-616
	LE32L11	-926	LE13C24	-354	LE21F17	-603	LE3P24	-79	LE33C06	-938	LE6J15	-177
	LE12J16	-334	LE30E01	-850	LE12P18	335	LE11D14	-294	LE29O16	-835	LE15P19	-433
	LE15B04	-421	LE24E24	-662	LE3I05	-61	LE25J21	-730	LE3P24	-79	LE28I11	-800
	LE8A24	-213	LE25G07	-694	LE10O01	-263	LE15B04	-421	LE30M09	-855	LE15L08	-424
	LE25G17	-696	LE15E19	-412	LE9H08	248	LE6H16	-169	LE23J03	-651	LE22E07	-611
	LE8A08	-212	LE7I08	-190	LE3E12	-65	LE17F05	-484	LE31C07	-879	LE11K19	-285
	LE25N18	-719	LE28K14	-809	LE7D01	-198	LE25D05	-722	LE18P14	-514	LE20K20	561
	LE14E20	-391	LE9M18	-244	LE6G16	-161	LE5H14	-133	LE2O19	-36	LE22K20	616
	LE33I24	-943	LE23D07	-649	LE27M24	-778	LE5H14	-133	LE24F16	-671	LE23J03	-651
	LE19I12	-534	LE31O17	-883	LE11B16	-293	LE12P18	335	LE22L17	625	LE6O06	162
	LE25M23	-699	LE16C03	-436	LE16K04	-444	LE28G20	-805	LE30M09	855	LE18F22	511
	LE12O23	-320	LE11D13	-302	LE17D13	-482	LE28I20	-806	LE11F05	-305	LE25H13	-727
	LE32H01	-923	LE12D04	-330	LE12J21	-339	LE13C24	354	LE15I07	-415	LE22K20	-616
	LE14E10	-390	LE11B13	-300	LE12C13	-315	LE6P11	-178	LE27C02	769	LE2K22	-43
	LE7N14	-196	LE7E22	-187	LE24F16	-671	LE21F17	-603	LE20K20	-561	LE22K20	-616
	LE30M09	855	LE27M17	-767	LE4F10	-107	LE12J16	-334	LE21D21	-602	LE27C02	-769
	LE30J13	-872	LE24P24	-679	LE13L14	-369	LE5H14	-133	LE15L08	-424	LE11B13	-300
	LE13G02	-357	LE30D23	-868	LE2C24	-39	LE15E19	-412	LE13O06	-362	LE18N03	-519
	LE33H13	-955	LE31I21	-881	LE9K02	-242	LE5H14	-133	LE19M21	528	LE30M09	855
	LE11L01	-957	LE9M18	-244	LE7N14	-196	LE4F22	-108	LE26J07	759	LE5J23	144
	LE27K18	-776	LE1B07	-26	LE31I21	-881	LE2N21	-56	LE22K20	-616	LE9J02	-249
	LE19G14	-532	LE16M17	-441	LE11D13	-302	LE25J21	-730	LE23J03	-651	LE3O14	-70
	LE6O06	-162	LE18N13	-520	LE29B16	-836	LE3L23	-88	LE19D04	538	LE8A08	-212
	LE21G08	-584	LE9F15	-254	LE3E12	-65	LE14E10	-390	LE20L23	-571	LE31H21	-895
	LE3E12	-65	LE27G12	-773	LE21B20	-592	LE2O19	36	LE22K20	-616	LE19J10	-542
	LE7J11	-202	LE29M08	-834	LE11E23	-284	LE20I03	-553	LE24M14	-669	LE15M07	417
	LE22N03	-626	LE3P08	-76	LE10A16	-264	LE15I14	-420	LE1K18	-11	LE22L17	625
	LE5A24	-122	LE11P03	-312	LE21L20	-597	LE12J21	-339	LE11N21	-311	LE4N07	-114
	LE12J04	-332	LE3P24	-79	LE12L13	-340	LE24G08	-663	LE23M14	-643	LE11M23	-286
	LE1G15	-3	LE12A21	-314	LE8A19	-206	LE23E09	-628	LE32K20	-911	LE27O24	-779
	LE17D13	482	LE8A08	-212	LE32O17	-902	LE6P11	-178	LE6M05	-154	LE7N03	-204
	LE1K18	-11	LE3E12	-65	LE25N18	-719	LE29K24	-833	LE24G08	-663	LE4E05	-92
	LE15F05	-429	LE18J22	-512	LE13L23	-374	LE8O22	219	LE29M21	-828	LE11H08	-295
	LE1J04	-18	LE3L07	-86	LE9L22	-250	LE25J21	-730	LE33I24	-943	LE1K18	-11
	LE1B07	-26	LE6D15	-172	LE27C02	-769	LE18M21	-499	LE23D06	-644	LE25B15	-721
	LE12J16	-334	LE25H13	-727	LE1L09	-28	LE21K07	-577	LE23C14	-639	LE25M23	-699
	LE18K23	-496	LE25I05	-698	LE6O06	-162	LE1H12	-16	LE10I12	-268	LE9C03	-228
	LE1I11	-4	LE10I24	-269	LE21O22	-590	LE27P11	-797	LE4N21	-115	LE21D21	-602
	LE20C22	-556	LE9C07	-229	LE25P19	-732	LE23L18	-646	LE32F16	-915	LE14C15	-380
	LE12E24	-326	LE16L04	-455	LE4O15	-96	LE26N08	-750	LE29M21	-828	LE16D22	-452
	LE13N05	-376	LE12J16	-334	LE30J09	-871	LE6O06	-162	LE7I20	-192	LE20K24	-562
	LE24D10	-670	LE2C24	-39	LE25N18	-719	LE10A11	-259	LE21M07	-579	LE14P10	-401
	LE9A08	-233	LE4N21	-115	LE26N08	-750	LE4C09	-91	LE26K09	-740	LE5I05	-118
	LE27J01	-792	LE24E24	-662	LE1G22	-8	LE17L11	-487	LE11H08	-295	LE15D07	-427
	LE23E09	-628	LE27C15	-763	LE30E17	-851	LE23L18	-646	LE25I06	-707	LE22K20	-616
	LE14B20	-396	LE3H15	83	LE11J16	-297	LE29M21	-828	LE9I16	-240	LE3P24	-79
	LE12J16	-334	LE27O24	-779	LE23L18	-646	LE30P19	-875	LE3E12	-65	LE22K20	-616
	LE27O11	-768	LE9C07	-229	LE4F10	-107	LE9C07	-229	LE22K20	616	LE25E12	703
	LE7E22	-187	LE6M05	-154	LE13C24	-354	LE32K06	-910	LE26H01	-757	LE14P10	-401
	LE18D16	-508	LE32L11	-926	LE23C06	-638	LE5J05	-141	LE10G13	-261	LE12A12	-322
	LE25M23	-699	LE33E05	-932	LE12J16	-334	LE3L23	-88	LE16K04	-444	LE9D08	-245
	LE25C11	-687	LE23K21	-634	LE26N08	-750	LE33L19	-959	LE1H20	-17	LE7E22	-187
	LE15L08	-424	LE14D10	-397	LE33J04	-949	LE22M24	-618	LE6H13	-176	LE18D24	-509
	LE33I24	-943	LE16K18	-445	LE5I07	-119	LE21O01	-580	LE25D09	-723	LE22K20	-616
	LE16D08	-450	LE19G13	-523	LE11D01	-301	LE32N22	-917	LE21K09	-578	LE24G08	-663
	LE25N10	-718	LE3P08	-76	LE28I11	-800	LE10A16	-264	LE23K03	-632	LE15L08	-424
	LE27E06	-772	LE27E06	772	LE30E01	-850	LE9C07	-229	LE31L12	891	LE18G02	-501
	LE2F02	-47	LE9M18	-244	LE26P06	-753	LE17M21	-468	LE3E12	-65	LE7I20	-192
	LE6B08	-165	LE7N01	-203	LE2E08	-40	LE6M05	-154	LE31I21	-881	LE2C23	-31
	LE12J21	-339	LE9G18	-239	LE10O10	-272	LE27J01	-792	LE10G13	-261	LE1K08	-10
	LE33C06	-938	LE24P06	-677	LE31H21	-895	LE15B04	-421	LE5L20	-135	LE25H13	-727
	LE25B07	-720	LE12J12	333	LE31O17	-883	LE27C02	-769	LE15D09	428	LE18K23	496
	LE27E11	-765	LE15L08	-424	LE21I20	-586	LE20F11	-570	LE6O06	-162	LE17K22	-474
	LE24E24	-662	LE27H24	-785	LE13O15	-350	LE1P20	-24	LE10E16	-267	LE33C11	-929
	LE25C11	-687	LE30D03	-867	LE19J10	-542	LE19I21	-526	LE15D07	427	LE6G23	153
	LE11K19	-285	LE11O14	-292	LE33H12	-948	LE33I24	-943	LE18G18	-503	LE22K20	-616
	LE32L11	-926	LE2C24	-39	LE29M21	-828	LE6G08	-160	LE13E20	-355	LE25M23	-699
	LE2C24	-39	LE20K24	-562	LE27B04	-780	LE14P10	-401	LE25M23	-699	LE19I21	-526
	LE26I01	-739	LE8A19	-206	LE7B09	-197	LE3E12	-65	LE1K20	-12	LE29O16	-835
	LE5H14	-133	LE7E22	-187	LE30O16	-862	LE28J07	-819	LE6M05	-154	LE14N13	-406
	LE3O23	-63	LE27D24	-782	LE15B04	-421	LE4F22	-108	LE13N01	-375	LE25B15	-721
	LE4I18	-100	LE2C24	-39	LE18I01	-494	LE12O23	320	LE3N24	-75	LE10C07	-260
	LE24P06	-677	LE3H15	83	LE14M01	-387	LE29P24	-842	LE14C15	380	LE22L17	625
	LE19G02	-531	LE12E24	-326	LE23K21	-634	LE2C24	-39	LE6M11	-155	LE6D12	-166
	LE24G10	-664	LE13M10	-361	LE19P02	-544	LE4G17	93	LE28J07	-819	LE10I24	-269
	LE15E11	-411	LE27C24	-771	LE16A13	-435	LE20I03	-553	LE4B21	-113	LE20D22	-565
	LE23L17	-654	LE31N18	-892	LE28J07	-819	LE10I24	-269	LE6M05	-154	LE22K20	616
	LE24G08	663	LE25C11	-687	LE20L16	-569	LE12P18	335	LE2C24	-39	LE7I10	-191
	LE12J16	-334	LE3L07	-86	LE27O11	-768	LE6N14	-170	LE11M23	-286	LE3I05	-61
	LE8P01	-225	LE9C03	-228	LE9A21	-227	LE6H02	-167	LE13O06	-362	LE6J15	-177
	LE6A23	-149	LE7E22	-187	LE33G09	933	LE33G09	-933	LE22D04	-621	LE3N24	-75
	LE9O01	-232	LE12E24	-326	LE19I21	-526	LE9K14	-243	LE11K19	-285	LE12J16	-334
	LE13F06	-363	LE3N01	-89	LE17H05	-486	LE31A13	878	LE12J12	333	LE9C22	235
	LE15L08	-424	LE9A21	-227	LE10M06	-271	LE13C03	-345	LE10A16	-264	LE33C20	-939
	LE30K12	859	LE5P17	148	LE12I06	-327	LE9L03	-255	LE11N13	-310	LE24G08	-663
	LE29I21	-826	LE10A16	-264	LE21A17	-574	LE3I05	-61	LE30M09	-855	LE24G08	-663
	LE10J17	-280	LE11H20	-296	LE16D21	-459	LE28N13	-821	LE27H15	791	LE22L17	625
	LE14M01	-387	LE29P24	-842	LE27C08	-770	LE33E01	-931	LE30E17	-851	LE7K12	-193
	LE15I07	415	LE15L08	424	LE20C03	-551	LE2O19	36	LE11K19	-285	LE6H16	-169
	LE33M19	-937	LE9K02	-242	LE3E12	-65	LE11D01	-301	LE5P17	148	LE21F14	594
	LE24B21	-681	LE27C02	-769	LE12J12	-333	LE2C23	-31	LE14B20	-396	LE24G08	-663
	LE12E24	-326	LE26N08	-750	LE19H20	-540	LE2C24	-39	LE17B07	-481	LE11D13	-302
	LE16D08	450	LE6G08	160	LE29K04	-832	LE21L20	-597	LE4N21	-115	LE15P19	-433
	LE3N01	-89	LE30J13	-872	LE29I21	-826	LE10A16	-264	LE29O16	-835	LE12A21	-314
	LE5H10	-132	LE31N18	-892	LE13N01	-375	LE26N13	-761	LE6O06	-162	LE18N13	-520
	LE29K04	-832	LE28K06	-807	LE25D05	-722	LE9O01	-232	LE2F02	47	LE6C03	-150
	LE4C09	-91	LE9O01	-232	LE15P19	-433	LE10A16	-264	LE16D21	-459	LE20D22	-565
	LE17C15	-463	LE11D01	-301	LE28A03	-799	LE14P10	-401	LE25J10	-714	LE4K23	94
	LE14E20	-391	LE7E22	-187	LE7K13	-180	LE33C11	-929	LE18K23	-496	LE15M07	417
	LE20N03	-572	LE31I21	-881	LE15E11	-411	LE27C24	-771	LE18D16	-508	LE11M23	-286
	LE8O20	-218	LE1P20	-24	LE14J12	-398	LE24M10	-668	LE7K13	180	LE15D09	-428
	LE19H20	-540	LE3N24	-75	LE27H08	-784	LE20I03	-553	LE12P11	342	LE17L11	-487
	LE24M14	-669	LE7N01	-203	LE31K16	-887	LE14E03	-381	LE11D21	-303	LE24G08	-663
	LE18K23	496	LE6A06	-156	LE11P03	-312	LE30E17	-851	LE25N18	-719	LE23J19	653
	LE33E01	-931	LE7E22	-187	LE12J12	333	LE9C22	235	LE27H15	-791	LE6O06	-162
	LE9P23	-258	LE25H13	-727	LE21J10	-595	LE11D13	-302	LE9F15	-254	LE24C15	-656
	LE23D07	-649	LE16M01	-440	LE33H12	-948	LE30D03	-867	LE10D01	-277	LE33I24	-943
	LE9P23	-258	LE26P24	-754	LE1I11	-4	LE6B23	-171	LE22L17	625	LE24K20	-667
	LE9E10	-238	LE8A08	-212	LE12J16	-334	LE32G19	-901	LE5J23	144	LE31A10	884
	LE7I10	-191	LE32D15	-922	LE2F05	-52	LE8C21	-209	LE9O01	-232	LE11F05	-305
	LE30E01	-850	LE9C07	-229	LE30K11	-853	LE17P03	-490	LE24M14	-669	LE7N01	-203
	LE11D21	-303	LE19E04	-530	LE9C07	-229	LE27C08	-770	LE15E23	-413	LE19N09	-547
	LE9A14	-234	LE10E16	-267	LE26E09	738	LE10M13	262	LE11D13	-302	LE11B05	-299
	LE9F15	-254	LE26N21	-762	LE32N22	-917	LE27H24	-785	LE14P10	-401	LE8A24	-213
	LE24K15	-659	LE5B23	-140	LE7I20	-192	LE20K24	-562	LE20I22	-559	LE1B05	-25
	LE15D07	-427	LE20F11	-570	LE22D04	-621	LE3N24	-75	LE15B04	-421	LE10O10	-272
	LE33I24	-943	LE26H01	-757	LE13P17	-378	LE10M13	-262	LE8A19	206	LE13E24	-356
	LE12E24	-326	LE33M05	-935	LE22M24	-618	LE25E08	-702	LE6M11	155	LE30M01	-854
	LE27I21	-766	LE25G07	-694	LE14P10	-401	LE7N01	-203	LE6O06	162	LE27C02	-769
	LE11H08	-295	LE2C24	-39	LE3G22	-67	LE15B04	-421	LE27O11	-768	LE15D09	-428
	LE1I11	-4	LE8I04	-217	LE33G09	-933	LE26A09	-734	LE30K12	859	LE2H02	-48
	LE31K16	-887	LE12J16	-334	LE21B20	-592	LE14B20	-396	LE9E04	-236	LE27G12	773
	LE23C14	-639	LE25M23	-699	LE3B16	-71	LE19E04	-530	LE32N22	-917	LE25P19	-732
	LE6M05	-154	LE2C24	-39	LE25C11	-687	LE23N05	-655	LE14G22	-393	LE14J12	-398
	LE9G18	-239	LE26O05	-742	LE15G24	-419	LE28O14	-811	LE24H07	-685	LE11E06	-288
	LE32K20	-911	LE29N03	-847	LE20I03	-553	LE19L21	-546	LE12N03	-341	LE19M21	528
	LE32C20	905	LE20I22	-559	LE25G09	-695	LE25P19	-732	LE25H13	-727	LE13G02	-357
	LE8A19	-206	LE6J15	-177	LE25D05	-722	LE33L19	-959	LE24G08	-663	LE27E06	-772
	LE15L08	-424	LE19C20	-529	LE25C11	-687	LE32D15	-922	LE22K20	-616	LE14G07	-383
	LE29I21	-826	LE9O01	-232	LE15C11	409	LE18K23	-496	LE13O15	-350	LE11D13	-302
	LE9E08	-237	LE27E06	-772	LE13L04	-367	LE1P20	-24	LE24G08	-663	LE33M05	-935
	LE22D16	-622	LE9K05	-231	LE19E04	-530	LE8A08	-212	LE2K11	-34	LE9F15	-254
	LE12E24	-326	LE25D21	-724	LE25G23	-697	LE27N13	-796	LE22A15	-609	LE24M14	-669
	LE29K24	-833	LE26N09	-760	LE16G07	-437	LE21B20	-592	LE12P18	335	LE22L17	625
	LE32E20	-908	LE30K11	-853	LE9A21	-227	LE25F07	-726	LE17F18	-478	LE20D22	-565
	LE8A08	-212	LE29F23	-844	LE20I15	-554	LE29B16	-836	LE15L08	-424	LE4J06	109
	LE2F23	-53	LE25I05	-698	LE4G17	-93	LE19D24	-539	LE4G22	-99	LE13G06	-358
	LE9M18	-244	LE4K23	-94	LE27C08	-770	LE28J07	-819	LE6C12	-158	LE14G11	-384
	LE18J22	-512	LE4E05	-92	LE6O06	-162	LE32D01	-921	LE2B22	-45	LE20I22	-559
	LE9O01	-232	LE23J03	-651	LE25D05	-722	LE9A08	-233	LE15F05	-429	LE18J22	-512
	LE13L14	-369	LE7E22	-187	LE16C04	-442	LE9O01	-232	LE22K20	616	LE5J09	-142
	LE1B05	-25	LE25N18	-719	LE6C11	-151	LE8A08	-212	LE17C15	-463	LE11D01	-301
	LE5M13	-121	LE14P10	-401	LE29J10	-839	LE20I03	-553	LE28B13	-817	LE26A05	-733
	LE12P18	-335	LE33M19	-937	LE15E11	-411	LE15N24	-426	LE26N06	-749	LE27C02	-769
	LE1I11	-4	LE1B07	-26	LE25H18	-713	LE15B04	-421	LE2O23	-37	LE11N21	-311
	LE28K19	-801	LE21I23	-576	LE28J07	-819	LE10A11	-259	LE33C13	-930	LE20D22	-565
	LE26I01	-739	LE30M09	855	LE5M13	-121	LE11F03	-304	LE8C21	-209	LE15E19	-412
	LE7F05	199	LE14B20	396	LE32N22	-917	LE32E19	-900	LE26N06	-749	LE2O24	-44
	LE10O22	-274	LE5H14	-133	LE9A14	-234	LE10E16	-267	LE33H13	-955	LE25M23	-699
	LE25C17	-688	LE12E24	-326	LE25L02	-716	LE6C11	-151	LE1H10	-15	LE1J04	-18
	LE6H08	-168	LE21B20	-592	LE32G19	-901	LE25G09	-695	LE21P16	-600	LE7N01	-203
	LE11H08	-295	LE15D07	-427	LE9A21	-227	LE25A10	-700	LE25M06	710	LE6C10	-157
	LE3P08	-76	LE6H11	-175	LE19G14	-532	LE31I21	-881	LE2E08	-40	LE6M05	-154
	LE31G20	-885	LE26N13	-761	LE10A16	-264	LE19G16	-533	LE18M17	-498	LE15D07	-427
	LE26N13	-761	LE2N21	-56	LE20I03	-553	LE25J10	-714	LE1H12	-16	LE8C21	-209
	LE27E06	-772	LE2K01	-33	LE6P11	-178	LE31D04	-890	LE18E13	492	LE8A19	206
	LE29J10	-839	LE27J08	-786	LE17K22	-474	LE13C03	-345	LE19C20	-529	LE22L17	625
	LE10I24	-269	LE4N21	-115	LE27C08	-770	LE2C24	-39	LE14B20	-396	LE3N24	-75
	LE15E19	-412	LE3G06	-66	LE24P16	-678	LE19N09	-547	LE2O24	-44	LE14A11	379
	LE15L08	-424	LE11B16	-293	LE25A03	-686	LE7I10	-191	LE27C02	769	LE30P05	-874
	LE1B07	-26	LE23E23	-631	LE31G20	-885	LE13C03	-345	LE12J19	-338	LE30M09	855
	LE9F04	-246	LE11B05	-299	LE27C02	-769	LE21N13	-608	LE6O06	162	LE26N21	-762
	LE15E19	-412	LE9E08	-237	LE3E12	-65	LE14E03	-381	LE18D16	-508	LE13O06	-362
	LE22G01	-612	LE1B07	-26	LE8C21	-209	LE2E10	-41	LE27B04	-780	LE13O06	-362
	LE19I21	-526	LE9K14	-243	LE4K08	-103	LE15B04	-421	LE29K24	-833	LE26N09	-760
	LE24G08	663	LE26A09	-734	LE12J16	-334	LE18G18	-503	LE8B10	-220	LE13O06	-362
	LE16J12	-454	LE18F04	-510	LE21P16	-600	LE16F13	-460	LE4E16	-98	LE29O16	-835
	LE1K24	-13	LE16B03	-456	LE19H20	-540	LE32D15	-922	LE3L07	-86	LE1I11	-4
	LE31O17	-883	LE15N24	-426	LE3N01	-89	LE19G16	-533	LE7N01	-203	LE25L02	-716
	LE11K16	290	LE18K23	-496	LE26N06	-749	LE27C02	-769	LE20D22	-565	LE29O17	-830
	LE2H15	-54	LE28I20	-806	LE19N09	-547	LE29H16	-837	LE11M23	-286	LE9C22	-235
	LE1J16	20	LE25N18	-719	LE27D24	-782	LE15N24	-426	LE9C22	-235	LE11K19	-285
	LE32I04	-909	LE9C07	-229	LE5L22	-136	LE28I20	-806	LE19D04	-538	LE9O01	-232
	LE7I08	-190	LE5M13	-121	LE33C06	-938	LE24P06	-677	LE5I05	-118	LE22A15	-609
	LE27E06	-772	LE6O12	-163	LE31G20	-885	LE24G08	-663	LE27H15	791	LE15I07	415
	LE12O13	-319	LE3E12	-65	LE21L20	-597	LE5I22	-126	LE19C21	-522	LE1P09	-29
	LE33I02	-942	LE20I22	-559	LE7N01	-203	LE10B06	-275	LE13O06	-362	LE2N21	-56
	LE15J04	-423	LE11D13	-302	LE11K19	-285	LE1G15	-3	LE9F20	-247	LE33I24	-943
	LE29F23	-844	LE8A24	-213	LE2O23	-37	LE27N13	-796	LE31B20	-889	LE18J22	-512
	LE3H15	83	LE28B20	812	LE12N03	-341	LE14E03	-381	LE6C11	-151	LE8C21	-209
	LE15L08	-424	LE11H19	308	LE32K20	-911	LE21L20	-597	LE30L15	-873	LE20I22	-559
	LE31H21	-895	LE32C20	905	LE6C11	-151	LE15F05	-429	LE23E11	-629	LE17B07	-481
	LE28I20	-806	LE5J17	-143	LE2C24	-39	LE25C12	-701	LE23K21	-634	LE22A15	-609
	LE25N18	-719	LE10A11	-259	LE23E09	-628	LE18D16	-508	LE8A24	-213	LE11K19	-285
	LE32G19	-901	LE25G09	-695	LE11P03	-312	LE19G16	-533	LE33J04	-949	LE12E14	-325
	LE11P03	-312	LE26N09	-760	LE17N03	-488	LE2C24	-39	LE24G08	-663	LE29I07	-824
	LE2C24	-39	LE28G20	-805	LE15B04	-421	LE1J12	-19	LE6N14	-170	LE9K14	-243
	LE25M23	-699	LE4B21	-113	LE15B04	-421	LE24F03	-682	LE13G02	-357	LE24G08	-663
	LE23E09	-628	LE5G10	-125	LE24P24	-679	LE24E24	-662	LE26N08	-750	LE18F22	511
	LE3H15	83	LE2D19	-49	LE15N24	-426	LE25J21	-730	LE24G08	-663	LE7A14	-184
	LE9F15	-254	LE20D08	-564	LE5M13	-121	LE6B23	-171	LE15E11	-411	LE24H01	-684
	LE9L22	-250	LE13M10	-361	LE2K21	-35	LE23L18	-646	LE18K23	496	LE6A06	-156
	LE15D07	-427	LE26E20	-744	LE25J21	-730	LE21G08	-584	LE29J10	839	LE22L17	625
	LE3P08	-76	LE21B08	-591	LE11F05	-305	LE21N10	-598	LE5L20	135	LE9L03	255
	LE8C02	-214	LE24F16	-671	LE5K19	-120	LE8C23	-210	LE8H10	-222	LE4N21	-115
	LE3P08	-76	LE31A11	-877	LE32E19	-900	LE11D13	-302	LE8B10	-220	LE30E17	-851
	LE1K24	-13	LE6H11	-175	LE32M02	-912	LE32C20	-905	LE9O01	-232	LE30F05	-869
	LE25A10	-700	LE12J16	-334	LE15B04	-421	LE24B09	-680	LE22L17	625	LE14E03	-381
	LE3P08	-76	LE21M20	-588	LE2H02	-48	LE12J19	-338	LE11F05	-305	LE13O06	-362
	LE16D08	-450	LE2F05	-52	LE11E05	-283	LE31N18	-892	LE12C13	315	LE5B05	-139
	LE9O01	-232	LE30F05	-869	LE20D22	-565	LE14B20	-396	LE4E05	92	LE20I22	-559
	LE25C11	-687	LE18F15	-517	LE2K22	-43	LE29O13	-829	LE25A10	-700	LE28L05	-820
	LE13A05	-343	LE27C08	-770	LE17K22	-474	LE19E04	-530	LE23M14	-643	LE10M13	262
	LE6B08	-165	LE2N21	-56	LE14P10	-401	LE16B03	-456	LE14D10	397	LE10O01	-263
	LE20I03	-553	LE24D10	-670	LE11E06	-288	LE32K20	-911	LE8G20	-216	LE33I24	-943
	LE5F02	-131	LE24I15	-658	LE20I15	-554	LE4K08	-103	LE12O13	-319	LE13C03	345
	LE16D06	-449	LE30M09	855	LE13P17	-378	LE17G22	-472	LE24G08	-663	LE19J02	-541
	LE9D08	-245	LE33M19	-937	LE30K11	-853	LE26F06	-748	LE19E04	-530	LE28I11	-800
	LE18D16	-508	LE26N06	-749	LE21D21	-602	LE25J21	-730	LE13M10	361	LE3G06	-66
	LE13G16	-359	LE15L08	-424	LE33H12	-948	LE20O17	-555	LE13A05	-343	LE22K20	-616
	LE5D08	-130	LE2K22	-43	LE30A07	-849	LE16J12	454	LE18N13	-520	LE14D10	397
	LE26N14	-751	LE5A24	-122	LE27J01	-792	LE26H01	-757	LE13M10	361	LE17K20	-473
	LE7I10	-191	LE7J11	-202	LE17M12	-475	LE30I22	-858	LE10C22	265	LE7E18	-186
	LE12I06	-327	LE20I03	-553	LE3L24	-73	LE15B04	-421	LE25L02	-716	LE33I24	-943
	LE8A08	-212	LE29K04	-832	LE26N08	-750	LE19I12	-534	LE10M06	-271	LE13C03	-345
	LE27J01	-792	LE19H20	-540	LE21L20	-597	LE17G22	-472	LE29M08	-834	LE7E22	-187
	LE3H15	83	LE18D05	-516	LE6M05	-154	LE14N13	-406	LE12E14	-325	LE23M14	-643
	LE18F04	-510	LE4E05	-92	LE17F18	-478	LE20D22	-565	LE6O06	-162	LE29N03	-847
	LE6M05	-154	LE21M07	-579	LE5H10	-132	LE31N18	-892	LE6O14	-164	LE6D12	-166
	LE1P20	24	LE1P20	-24	LE25N18	-719	LE7I20	-192	LE22L17	625	LE18G12	502
	LE7E22	-187	LE3G06	-66	LE21P16	-600	LE31M07	-882	LE28N24	-816	LE24G08	-663
	LE3A07	-57	LE26N06	-749	LE3C14	-64	LE14P10	-401	LE24K15	-659	LE26A05	-733
	LE28O04	-810	LE23L18	-646	LE22M06	-617	LE2C23	-31	LE21K18	-587	LE9F20	-247
	LE15J03	-431	LE25H13	-727	LE13C03	-345	LE8H10	-222	LE32K20	-911	LE29N03	-847
	LE28E12	-804	LE15D07	-427	LE25B07	-720	LE12J12	333	LE26N09	-760	LE1K05	-5
	LE12J19	338	LE18D24	509	LE20I22	-559	LE14P10	-401	LE2O24	-44	LE28N04	-815
	LE32E20	-908	LE8O22	-219	LE19E04	-530	LE33J10	-950	LE26F02	-747	LE15B04	421
	LE13E20	-355	LE25M23	-699	LE29J10	-839	LE2K11	-34	LE14J12	-398	LE9O01	-232
	LE12E24	-326	LE31L12	-891	LE5L20	-135	LE3I05	-61	LE16C04	-442	LE18F04	-510
	LE15L08	-424	LE14G16	-392	LE23J19	653	LE4N21	-115	LE9K02	-242	LE20I22	-559
	LE8C23	-210	LE6A23	-149	LE12L13	-340	LE6C11	-151	LE22H05	-623	LE22L17	625
	LE8P01	-225	LE29B16	-836	LE16K04	-444	LE9D08	-245	LE1B07	-26	LE14P14	402
	LE9N05	-256	LE16D21	-459	LE33K14	-944	LE21L20	-597	LE15L08	-424	LE15I14	-420
	LE21J01	-604	LE12E24	-326	LE27M17	-767	LE18K17	-495	LE18K23	496	LE28G20	805
	LE11H20	-296	LE24G08	-663	LE27M16	-777	LE26N08	-750	LE4L20	-111	LE13C03	-345
	LE7K12	-193	LE12E24	-326	LE23E19	-630	LE19E04	-530	LE9N05	-256	LE16D21	-459
	LE31D04	-890	LE27E06	-772	LE11H19	-308	LE6J15	-177	LE33I24	-943	LE8P17	-226
	LE16A03	-434	LE9M18	-244	LE32C12	-904	LE21B20	-592	LE19N09	-547	LE24F16	-671
	LE15P19	-433	LE9F15	-254	LE17I11	-466	LE5L22	-136	LE16K04	-444	LE28G20	-805
	LE15D07	427	LE20I03	553	LE10I24	-269	LE6P11	-178	LE19E04	-530	LE2C23	-31
	LE7A14	-184	LE7E22	-187	LE8C21	-209	LE15E19	-412	LE6D12	-166	LE2I14	-42
	LE9C07	-229	LE6A06	-156	LE21A16	-582	LE33H12	-948	LE30E01	-850	LE3P24	-79
	LE22M24	-618	LE29K01	-827	LE15P19	-433	LE6C11	-151	LE3O23	-63	LE24G08	-663
	LE21K07	-577	LE16D08	-450	LE15G24	-419	LE6A06	-156	LE8C21	-209	LE25A03	-686
	LE32N21	-927	LE1K24	-13	LE30K12	-859	LE23E09	-628	LE33I02	-942	LE20I22	-559
	LE30A07	-849	LE1B07	-26	LE22M24	-618	LE16F13	-460	LE25G23	-697	LE19N09	-547
	LE13M10	-361	LE4F22	-108	LE10E16	-267	LE13N01	-375	LE21G08	-584	LE9F15	-254
	LE32D10	-914	LE12J19	-338	LE27J01	-792	LE19H20	-540	LE28J07	819	LE22L17	625
	LE12E24	-326	LE3P14	-78	LE15B04	-421	LE4A17	-90	LE15E19	-412	LE30E17	-851
	LE5M13	121	LE30M09	-855	LE27K18	-776	LE16K04	-444	LE8O20	-218	LE24G08	-663
	LE22G01	-612	LE25I05	-698	LE14G16	-392	LE30E01	-850	LE1C17	-1	LE15L08	-424
	LE30M09	855	LE5B05	-139	LE8O22	-219	LE16K04	-444	LE30B07	-866	LE13O06	-362
	LE31H21	-895	LE30J13	-872	LE2K11	-34	LE25G17	-696	LE3N24	-75	LE20K20	-561
	LE23D06	-644	LE11D13	-302	LE4E16	-98	LE24K20	-667	LE3P24	-79	LE25D21	-724
	LE30M09	-855	LE15L08	-424	LE27M17	-767	LE17I11	-466	LE12J16	-334	LE10O22	-274
	LE12E24	-326	LE27B04	-780	LE5B03	-138	LE21L20	-597	LE15B04	421	LE25J17	-729
	LE27D24	-782	LE8P01	-225	LE8C01	-207	LE25E08	-702	LE14G22	-393	LE25E12	-703
	LE7J11	-202	LE7I21	-179	LE20H18	-568	LE24G08	-663	LE23O09	-636	LE27C02	769
	LE2C24	-39	LE32C12	-904	LE33H12	-948	LE25C12	-701	LE30E17	-851	LE23J05	-652
	LE26N21	-762	LE3N01	-89	LE3I08	-68	LE1H20	-17	LE8I04	-217	LE24G08	-663
	LE20D22	-565	LE17B07	-481	LE32K06	-910	LE13P20	-371	LE25D09	-723	LE17C15	-463
	LE28I11	-800	LE10A16	-264	LE15G24	-419	LE5B23	-140	LE24G08	663	LE23E09	-628
	LE7I21	-179	LE21I23	-576	LE23J18	-645	LE32F16	-915	LE33C06	-938	LE11F03	-304
	LE16D08	-450	LE7P03	-205	LE12J16	-334	LE25H13	-727	LE13L14	-369	LE5H14	-133
	LE5A24	-122	LE14M13	-388	LE15E19	-412	LE23E09	-628	LE27C02	-769	LE18M21	-499
	LE1B07	-26	LE26N21	-762	LE20C22	-556	LE9C07	-229	LE11B05	-299	LE25C11	-687
	LE6D15	-172	LE9O01	-232	LE23E09	-628	LE5G10	-125	LE8C21	-209	LE29N13	-848
	LE28L05	-820	LE33C06	-938	LE30K11	-853	LE31H21	-895	LE24L10	-674	LE27J03	-793
	LE3N10	-74	LE33M19	-937	LE23N10	-648	LE25H18	-713	LE2F05	-52	LE8C21	-209
	LE17I11	-466	LE27J08	-786	LE24F16	-671	LE15M15	-418	LE22M24	-618	LE7J11	-202
	LE8C21	-209	LE15E19	-412	LE15B04	-421	LE7P03	-205	LE25C11	-687	LE11M23	-286
	LE26H11	-758	LE24M10	-668	LE18J03	-518	LE25N18	-719	LE19L21	-546	LE4N21	-115
	LE17D06	-476	LE22K14	-615	LE33C06	-938	LE16C04	-442	LE30I22	858	LE27J03	793
	LE9C07	-229	LE2C23	-31	LE12J21	-339	LE8C01	-207	LE4K23	94	LE5A24	-122
	LE24F16	-671	LE18E13	-492	LE2B22	-45	LE20I03	-553	LE29I21	-826	LE9O01	-232
	LE3E21	-60	LE8P01	-225	LE27J01	-792	LE17H01	-485	LE33J18	-951	LE23L17	-654
	LE24F03	-682	LE12J16	-334	LE12J16	-334	LE9D08	-245	LE15E11	-411	LE20D22	-565
	LE31I21	-881	LE15F05	-429	LE27G12	-773	LE31N18	-892	LE28L05	-820	LE14D05	-403
	LE12E24	-326	LE28K19	-801	LE6B08	-165	LE14I04	-394	LE31H21	-895	LE10I24	269
	LE16D20	-451	LE23M14	-643	LE9J02	-249	LE3E12	-65	LE16D06	449	LE8A19	206
	LE13I24	-360	LE18F04	-510	LE16D06	449	LE21C14	-583	LE25H18	-713	LE33I02	-942
	LE30M09	855	LE18G12	-502	LE29M21	-828	LE32D01	-921	LE8A19	206	LE23K13	633
	LE30B07	866	LE15L08	-424	LE21L20	-597	LE16B20	-448	LE9K05	-231	LE9B11	-252
	LE17K20	-473	LE31I21	-881	LE20I03	-553	LE21A16	-582	LE30A07	849	LE22L17	625
	LE2C08	-38	LE20I03	-553	LE33G09	-933	LE12E14	-325	LE30F08	-863	LE11K19	-285
	LE12O23	-320	LE8C23	-210	LE29J10	-839	LE21N10	-598	LE21N10	-598	LE1G11	-2
	LE30M09	855	LE26P24	-754	LE24F16	-671	LE26I14	-745	LE11F05	-305	LE32F16	-915
	LE10D01	-277	LE33I24	-943	LE2K21	-35	LE9C07	-229	LE2K11	34	LE22L17	625
	LE31H21	-895	LE29I01	-823	LE14N13	-406	LE14J12	-398	LE1H20	-17	LE20K08	-560
	LE32F16	-915	LE2O23	-37	LE10G13	-261	LE23K10	-641	LE2O24	-44	LE22D04	-621
	LE17K05	-467	LE15D07	-427	LE4L20	-111	LE13C03	-345	LE6O06	-162	LE19L21	-546
	LE9N05	-256	LE9P17	-257	LE5D08	-130	LE2K22	-43	LE27J08	-786	LE33C06	-938
	LE25G09	-695	LE11N13	-310	LE21L20	-597	LE31N03	-896	LE12K22	-328	LE27C02	-769
	LE30M09	855	LE29C10	-831	LE31I21	-881	LE14P15	-407	LE20H18	-568	LE20I22	-559
	LE30P05	-874	LE12D04	-330	LE21B20	-592	LE12N03	-341	LE21N10	-598	LE2C23	-31
	LE31O17	-883	LE32N21	-927	LE15B04	-421	LE26F06	-748	LE18P07	-521	LE6D12	-166
	LE31K16	-887	LE26N13	-761	LE12D03	-336	LE22M24	-618	LE13O06	-362	LE10B06	-275
	LE12D04	-330	LE21M07	-579	LE10A16	-264	LE17H05	-486	LE24K14	-666	LE23D06	-644
	LE16D08	-450	LE19J24	-543	LE3O23	-63	LE24G08	-663	LE25M23	-699	LE16C03	-436
	LE12J19	338	LE14M13	388	LE3L23	-88	LE13N01	-375	LE11M23	-286	LE16D05	-458
	LE11B05	-299	LE15E23	413	LE2F02	-47	LE20D22	-565	LE32F16	-915	LE24D10	-670
	LE27C02	-769	LE3O14	-70	LE19N09	-547	LE22G01	-612	LE8G20	-216	LE2H02	-48
	LE22M24	-618	LE16F13	-460	LE3O14	-70	LE9C07	-229	LE30E17	-851	LE30I06	-857
	LE33H13	-955	LE25M23	-699	LE14E15	-382	LE15B04	-421	LE29E13	-822	LE2O24	-44
	LE6M05	-154	LE28K06	-807	LE21B20	-592	LE6G08	-160	LE25M23	-699	LE13C06	-353
	LE3O14	-70	LE12J16	-334	LE13N01	-375	LE7G02	-188	LE21N13	-608	LE24G08	-663
	LE21L20	-597	LE31I21	-881	LE15E23	-413	LE14E10	-390	LE30E17	-851	LE23L18	-646
	LE9O01	-232	LE11F05	-305	LE13A13	-344	LE8C23	-210	LE2O24	-44	LE26N08	-750
	LE7G16	-189	LE1G15	-3	LE21O12	-589	LE27C02	-769	LE11K19	-285	LE11O14	-292
	LE22K20	-616	LE28A03	-799	LE22N03	-626	LE25A03	-686	LE10O10	-272	LE7D01	-198
	LE10A16	-264	LE15I14	-420	LE14E03	-381	LE5I22	-126	LE6O06	-162	LE17B07	-481
	LE4E16	-98	LE17P03	-490	LE21M07	-579	LE14E20	-391	LE25G16	-706	LE27E06	-772
	LE1L08	-21	LE20I03	-553	LE24G08	663	LE33K09	-934	LE33J04	-949	LE1J04	-18
	LE25I05	-698	LE15E23	-413	LE27C02	-769	LE3O14	-70	LE17C15	-463	LE10E16	-267
	LE12E24	-326	LE18I01	-494	LE25H18	-713	LE11F11	-306	LE1J04	-18	LE3H09	-82
	LE6M11	-155	LE23E09	-628	LE33M19	-937	LE1K24	-13	LE18F22	511	LE15L08	424
	LE32C20	-905	LE12H20	-331	LE27C02	-769	LE9E04	-236	LE25D05	-722	LE31I21	-881
	LE25C11	-687	LE19E04	-530	LE29L11	-846	LE18F22	-511	LE19E04	-530	LE3P08	-76
	LE11E23	-284	LE31I21	-881	LE33G09	-933	LE30M09	-855	LE33H21	-956	LE15L08	-424
	LE30I06	-857	LE16M01	-440	LE19G16	-533	LE6H16	-169	LE19D04	538	LE18M13	-497
	LE13E24	-356	LE23L18	-646	LE25I06	-707	LE13N01	-375	LE22M06	-617	LE6O06	-162
	LE15L08	-424	LE27J03	-793	LE32P14	-918	LE5L13	-146	LE6E22	-159	LE1G11	-2
	LE12O23	-320	LE24I15	-658	LE32B03	-919	LE9A21	-227	LE18M21	499	LE30M01	854
	LE23L18	-646	LE8C23	-210	LE9C07	-229	LE6A06	-156	LE31K20	-888	LE22K20	-616
	LE31I21	-881	LE2C23	-31	LE12I06	-327	LE32P14	-918	LE22K20	616	LE33M05	935
	LE8C21	-209	LE25A03	-686	LE16D21	-459	LE15J04	-423	LE7I20	-192	LE33L13	-958
	LE13K13	-348	LE12E24	-326	LE23L18	-646	LE21M20	-588	LE32N22	-917	LE3M09	-62
	LE24B21	-681	LE11D13	-302	LE33J18	-951	LE23L17	-654	LE28E12	-804	LE15D07	-427
	LE12J04	-332	LE13F23	-373	LE12J16	-334	LE30E01	-850	LE26N13	-761	LE15I13	-416
	LE25G23	-697	LE27N13	-796	LE32N22	-917	LE25P19	-732	LE16K04	-444	LE27J03	-793
	LE32M02	-912	LE14B20	396	LE21J03	-605	LE25G17	-696	LE23J19	-653	LE13L14	-369
	LE22M24	-618	LE21N13	-608	LE24E24	-662	LE2C23	-31	LE16O12	-446	LE9B13	253
	LE1H12	16	LE16D05	-458	LE25C19	-689	LE10A16	-264	LE26A09	-734	LE25E21	-692
	LE27L21	-795	LE12E24	-326	LE14M13	-388	LE26P02	-752	LE11D13	-302	LE23O09	-636
	LE32C20	-905	LE30F05	-869	LE24B21	-681	LE22A15	-609	LE20O17	-555	LE21J01	-604
	LE15P19	-433	LE10A16	-264	LE3P24	-79	LE32A13	-898	LE24F03	682	LE20L16	-569
	LE7L20	-438	LE23L18	-646	LE31I24	-886	LE20I03	-553	LE15P19	-433	LE29M21	-828
	LE15D07	427	LE21M20	-588	LE33E01	-931	LE31P23	-897	LE15G13	-414	LE5D08	130
	LE2C24	39	LE4N21	-115	LE16D21	-459	LE20D22	-565	LE26H01	-757	LE25B15	-721
	LE13L04	-367	LE1P20	-24	LE22M24	-618	LE21N13	-608	LE24G08	-663	LE27E03	-764
	LE9C07	-229	LE27B06	-781	LE33J18	-951	LE25N18	-719	LE4N21	-115	LE18G12	-502
	LE16K04	-444	LE21B20	-592	LE25N18	-719	LE22M19	-613	LE15I14	-420	LE33I24	-943
	LE2O23	-37	LE11N21	-311	LE11P03	-312	LE32O02	-913	LE16G02	-443	LE20O17	-555
	LE17J22	-480	LE28I20	-806	LE6C11	-151	LE2K21	-35	LE25M23	-699	LE17H04	-479
	LE5L13	-146	LE9F15	-254	LE15A11	-408	LE6C11	-151	LE25G17	-696	LE28K19	801
	LE16D08	-450	LE18A23	-491	LE9C07	-229	LE29J10	-839	LE18F15	-517	LE10O10	-272
	LE15F07	-430	LE13C03	-345	LE9C07	-229	LE19D04	-538	LE17K22	-474	LE13C03	-345
	LE12J12	-333	LE23L18	-646	LE28I20	-806	LE11D14	-294	LE19I21	-526	LE32B03	-919
	LE21A05	-573	LE28K06	-807	LE18D16	-508	LE25N18	-719	LE18D16	-508	LE16B11	-457
	LE26N08	-750	LE1P09	-29	LE22M24	-618	LE29K01	-827	LE30I22	-858	LE1P09	-29
	LE11K19	-285	LE12J16	-334	LE6M05	-154	LE3C14	-64	LE4E05	92	LE14J14	-399
	LE32N22	-917	LE6M05	-154	LE21N07	-607	LE16D21	-459	LE11K19	-285	LE9E04	-236
	LE29L11	-846	LE32A17	-899	LE19J24	-543	LE21L20	-597	LE24C15	-656	LE17D13	-482
	LE26P24	-754	LE31N03	-896	LE28L05	-820	LE19E04	-530	LE7A14	-184	LE22A15	-609
	LE16P01	462	LE33J04	-949	LE28B13	-817	LE1P20	-24	LE8C24	-215	LE4I20	-101
	LE1L24	-22	LE18F04	-510	LE29K01	-827	LE25N18	-719	LE3P08	-76	LE33M19	-937
	LE31K16	-887	LE29K24	-833	LE33E01	-931	LE22B24	-620	LE14D05	-403	LE20F06	-566
	LE30M09	855	LE32O17	-902	LE12D04	-330	LE25N18	-719	LE20K08	-560	LE1K21	-6
	LE5B03	-138	LE24M10	-668	LE25N18	-719	LE29I13	-825	LE3P12	-77	LE16B11	-457
	LE3H15	83	LE20D08	564	LE9J02	-249	LE1C02	-7	LE23M14	-643	LE14G16	-392
	LE30M09	855	LE16P01	-462	LE15F05	-429	LE2O24	-44	LE2C24	-39	LE28G20	-805
	LE14D15	-404	LE17K05	-467	LE8E05	-211	LE1P20	-24	LE33I24	-943	LE9C11	-230
	LE5B05	-139	LE15L08	-424	LE14B20	-396	LE17I11	-466	LE32K06	910	LE21C14	-583
	LE8A19	-206	LE8G20	-216	LE8F06	221	LE12K22	-328	LE16O12	-446	LE10P06	-276
	LE25G23	-697	LE19N09	-547	LE8C13	-208	LE6C11	-151	LE3M09	-62	LE21J17	-606
	LE7L20	-438	LE12E24	-326	LE12I06	-327	LE20I03	-553	LE5K19	-120	LE20I22	-559
	LE12J16	-334	LE13O19	-351	LE20F11	-570	LE19I21	-526	LE10O01	-263	LE29M21	-828
	LE10A16	-264	LE19G16	-533	LE17P03	-490	LE4F10	-107	LE14D10	-397	LE13N02	-370
	LE19P02	-544	LE12D04	-330	LE15G24	-419	LE11H19	-308	LE4I20	-101	LE17A06	-469
	LE5A24	-122	LE18K23	496	LE24K15	-659	LE21J03	-605	LE28I11	-800	LE10A16	-264
	LE27C02	-769	LE32C20	-905	LE18F22	-511	LE10G13	-261	LE27C02	769	LE13G13	-347
	LE14P15	-407	LE15L08	-424	LE12J16	-334	LE5B23	-140	LE23L17	-654	LE7I20	-192
	LE11D13	-302	LE3P14	-78	LE6M05	-154	LE19I21	-526	LE11K19	-285	LE23J18	-645
	LE29N03	-847	LE23M14	-643	LE23E09	-628	LE27C15	-763	LE16A03	-434	LE13L14	-369
	LE13E20	-355	LE22M24	-618	LE21B20	-592	LE28C20	-803	LE33I24	-943	LE9P23	-258
	LE1B07	-26	LE17H01	-485	LE8O20	-218	LE1P20	-24	LE6O06	-162	LE1H12	-16
	LE1H20	-17	LE20K08	-560	LE32C20	-905	LE7N03	-204	LE26N09	-760	LE14P15	-407
	LE3P08	-76	LE3L24	-73	LE8C23	-210	LE13F06	-363	LE8A19	206	LE3C14	64
	LE5L20	-135	LE3I05	-61	LE25N18	-719	LE15I07	-415	LE20D22	-565	LE17B07	-481
	LE3H15	83	LE4C09	-91	LE15G24	-419	LE23E12	-640	LE14C15	-380	LE1G11	2
	LE4I20	-101	LE1B07	-26	LE13B05	-372	LE21N10	-598	LE14G16	-392	LE15P19	-433
	LE13C24	-354	LE18F04	-510	LE11P03	-312	LE26N09	-760	LE19G14	-532	LE27C02	769
	LE12D04	-330	LE5L02	-134	LE33H12	-948	LE8C13	-208	LE8A24	-213	LE32O02	-913
	LE4M10	-104	LE15L08	-424	LE9C07	-229	LE14G07	-383	LE27O11	-768	LE6N14	-170
	LE4B21	-113	LE12E24	-326	LE26F06	-748	LE25N18	-719	LE11K19	-285	LE27I24	-774
	LE17D06	-476	LE6P11	-178	LE16D21	-459	LE1L09	-28	LE4N21	-115	LE5A24	-122
	LE17D13	-482	LE9K05	-231	LE23E09	-628	LE21K09	-578	LE2O19	-36	LE4E05	92
	LE27N10	788	LE29I13	-825	LE6G08	-160	LE28I20	-806	LE33I24	-943	LE23K21	-634
	LE29J18	840	LE18K23	496	LE5H14	-133	LE13O15	-350	LE26P06	-753	LE22K20	-616
	LE1B07	-26	LE18M20	-504	LE30M09	-855	LE18P14	-514	LE22K20	616	LE26H11	-758
	LE7I20	-192	LE15L08	-424	LE11P03	-312	LE25N10	-718	LE29O13	-829	LE33I24	-943
	LE16A13	-435	LE13K23	-349	LE2H02	-48	LE11K16	-290	LE4B21	-113	LE20I22	-559
	LE23M14	-643	LE20E07	-552	LE3E12	-65	LE22D04	-621	LE27C02	769	LE10M13	262
	LE9M18	-244	LE14C15	-380	LE32K06	-910	LE1C02	-7	LE8H10	222	LE11H19	-308
	LE3I08	-68	LE1H20	-17	LE30E17	-851	LE10A11	-259	LE12C13	315	LE29L05	-845
	LE32I04	-909	LE6C10	-157	LE1K05	-5	LE15D07	-427	LE3G06	-66	LE30M09	855
	LE6O06	-162	LE17K22	-474	LE25B07	720	LE28K14	-809	LE27F04	-783	LE10G13	-261
	LE10A16	-264	LE17H05	-486	LE29B16	-836	LE8A24	-213	LE4G17	93	LE17J22	-480
	LE22L17	-625	LE22M24	-618	LE23E09	-628	LE27M16	-777	LE11H08	-295	LE2C24	-39
	LE24I15	-658	LE15M07	-417	LE3E12	-65	LE9P23	-258	LE25J10	714	LE18K23	-496
	LE15E11	-411	LE15N24	-426	LE33G09	-933	LE15H16	-422	LE25N18	-719	LE24G08	663
	LE30L15	-873	LE12E24	-326	LE19I21	-526	LE20K08	-560	LE2F01	-51	LE24G08	-663
	LE6J15	-177	LE7P03	-205	LE21J03	-605	LE12J16	-334	LE24K15	-659	LE17F05	-484
	LE32C20	-905	LE31L12	-891	LE1G11	-2	LE15G24	-419	LE4N21	-115	LE11A10	287
	LE27H15	-791	LE6O06	-162	LE18D08	-507	LE7J11	-202	LE4G22	-99	LE27C02	-769
	LE32N22	-917	LE25P19	-732	LE25N18	-719	LE31H21	-895	LE30M09	855	LE24K14	-666
	LE9F15	-254	LE27H15	-791	LE25F07	-726	LE18D24	-509	LE1J04	-18	LE17A06	-469
	LE3P08	-76	LE2K21	-35	LE6C11	-151	LE5B03	-138	LE5I07	-119	LE26J07	-759
	LE28K06	-807	LE17E14	-470	LE19E04	-530	LE28I11	-800	LE2H02	-48	LE11K16	-290
	LE11H20	-296	LE31K20	-888	LE9B13	-253	LE14J12	-398	LE8C23	-210	LE13F06	-363
	LE15E19	-412	LE14B20	-396	LE24H07	-685	LE11E06	-288	LE3P08	-76	LE24F16	-671
	LE21I23	-576	LE13A20	-352	LE29J18	-840	LE15N24	-426	LE3P24	-79	LE32A13	-898
	LE25G16	-706	LE11D13	-302	LE11K16	-290	LE27C02	-769	LE11K19	-285	LE26P06	-753
	LE33K09	-934	LE32C20	-905	LE19I21	-526	LE25E05	-690	LE9A14	-234	LE10E16	-267
	LE15L12	-425	LE8A08	-212	LE24M14	-669	LE14G16	-392	LE4K23	94	LE23J19	-653
	LE17P03	-490	LE10K18	-270	LE3E12	-65	LE25C19	-689	LE1P09	-29	LE13I24	-360
	LE5D08	-130	LE11D13	-302	LE21N10	-598	LE27L21	-795	LE6C10	-157	LE22K20	-616
	LE3H15	-83	LE22E07	-611	LE11H20	-296	LE17H04	-479	LE30P05	-874	LE18K23	-496
	LE29O13	-829	LE29I01	-823	LE33M05	-935	LE23E09	-628	LE10I12	-268	LE29K04	-832
	LE11N11	-309	LE5M04	-127	LE12J16	-334	LE5B03	-138	LE19J02	-541	LE7I20	-192
	LE5L02	-134	LE20I03	-553	LE21L20	-597	LE33F14	-947	LE17G02	-471	LE8C23	-210
	LE13G02	-357	LE24K14	-666	LE10O10	-272	LE13C03	-345	LE18N03	-519	LE30M09	855
	LE16D08	-450	LE32M02	-912	LE21N10	-598	LE26N21	-762	LE25A03	-686	LE25H18	-713
	LE19D24	-539	LE23M14	-643	LE19C21	-522	LE21B20	-592	LE23J19	653	LE7P03	-205
	LE16I17	-439	LE12E24	-326	LE26B11	-755	LE23E09	-628	LE32M02	-912	LE32C20	-905
	LE25H18	-713	LE24K14	-666	LE15N24	-426	LE21F17	-603	LE4N21	-115	LE10H23	-279
	LE17K22	-474	LE16D08	-450	LE27L21	-795	LE25N18	-719	LE14D10	-397	LE30M09	855
	LE3P08	-76	LE18G18	-503	LE33A03	-928	LE10A16	-264	LE27J01	-792	LE31H21	-895
	LE5P17	-148	LE21I23	-576	LE16M17	-441	LE15G24	-419	LE30E17	-851	LE33K09	-934
	LE21F17	-603	LE31H21	-895	LE32C20	-905	LE7H09	-200	LE24G08	663	LE12A21	-314
	LE25C19	-689	LE23E09	-628	LE8C01	-207	LE18D08	-507	LE6A23	149	LE28A14	-802
	LE28J07	-819	LE10I24	-269	LE10M06	-271	LE25G09	-695	LE20F11	-570	LE19I21	-526
	LE32C20	-905	LE7N03	-204	LE32E04	-906	LE21L20	-597	LE26N09	-760	LE33M04	-945
	LE12E24	-326	LE5J09	-142	LE30O16	-862	LE24K15	-659	LE26A11	-735	LE20I22	-559
[truncated: 98,006 more rows]
