# Supplementary material for: Fine-Tuning Tomato Agronomic Properties by Computational Genome Redesign
Source: PLoS Comput Biol. 2012 Jun 7;8(6):e1002528. doi: 10.1371/journal.pcbi.1002528 (PMC3369923; doi:10.1371/journal.pcbi.1002528)
Supplement: Dataset S4 — Experimental evidences of each gene perturbation proposed by the model to optimize the different scoring function used. (XLS) [file pcbi.1002528.s004.xls]

## Sheet: Evidences
SGN-U2 gene	Gene Annotation	SGN-U2 gene pair	Gene Annotation pair	Type of perturbation	Acceptability	Fructose and glucose	Malic and citric acids	Quality (aroma and taste)	Quality vs production	Vitamin C	Direct evidences (tomato)	Indirect evidences (tomato and other plants)	Organism	References
SGN-U212914	Superoxide dismutase [Cu-Zn] 2			OV						↑		vtc2 mutant have reduced ascorbate among high expressed genes a Cu-zn-SOD, inversely correlated with trigonelline abundance	tomato, Arabidopsis	Mounet 2009, Giacomelli 2006
SGN-U212979	40S Ribosomal protein S3a-like (cytosolic)			KO				↑		↓		rin,nor and nr mutants present differential expression regulation of RPs; IL12-3 with altered levles in asocorbate present among differential genes ribosomal proteins	tomato	Osorio 2011, Di Matteo 2010
SGN-U213236	Histone H3.2 (en SGN esta como H3)			KO		↓				↓		IL12-4 with high levels of ascorbate have reduced levels of H3.2 (in the file is H3 but in TIGR is H3.2)and H4	tomato	Di Matteo 2010
SGN-U213463	YABBY2-like transcription factor YAB2			KO		↑						YABBY proposed controlling fruit size/auxin reported controling fruit growth and ripening	tomato	Cong 2008, Wang 2009
		SGN-U216342	tRNA-dihydrouridine synthase A, putative	OV:OV				↑
SGN-U213645	Ribosomal protein S27-like protein			KO		↓	↑	↑				rin,nor and nr mutants present differential expression regulation of RPs	tomato	Osorio 2011
SGN-U213977	Clathrin adaptor complexes medium subunit family protein			OV	↑	↑		↑	↑	↓		CAC have been described in auxin transporter recycling
		SGN-U214499	Cysteine protease (SlVPE5)	OV:KO					↑		SlVPE5 KO enhances total sugar accumulation in red ripe fruit		tomato	Ariizumi 2011
		SGN-U217276	Prefoldin subunit, putative	OV:OV					↑
		SGN-U218428	dolichyl-phosphate beta-glucosyltransferase, putative	OV:OV					↑
SGN-U214309	6-phosphogluconolactonase-like protein			KO		↑	↓					sugar and citric acid content	peach	Ogundiwin 2009
				OV					↑
SGN-U214351	Ribosomal protein L30e (cytosolic)			OV	↑	↓	↑					rin,nor and nr mutants present differential expression regulation of RPs	tomato	Osorio 2011
SGN-U214621	LEXYL2			OV	↑						texture/ripening		tomato	Itai 2003
SGN-U214705	Triosephosphate isomerase, chloroplastic			OV						↑
SGN-U215149	Similar to 60S ribosomal protein L35 (cytosolic)											rin,nor and nr mutants present differential expression regulation of RPs	tomato	Osorio 2011
		SGN-U220492	sucrose phosphate synthase	OV:OV				↑			switness, OV increases sucrose		tomato	Miron 1991,Stommel 1992, Nguyen-Quoc1999
SGN-U215229	Heat shock protein, putative			KO	↑		↓	↑				vis1(a HSP), inversely correlated to juice viscosity	tomato	Ramakrishna 2003
SGN-U215556	ER33 protein			OV			↓					ER33, ethylene response bHLH gene up-regulated during ripening/supression of ethylene biosynthesis by ACC2 antisense lead to increase in malic and citric acid	tomato	Zegzouti 1999, Gao 2007
SGN-U215564	Serine/threonine protein kinase, putative			KO						↑
SGN-U215591	Adenylate kinase 1, putative			KO						↑		Potato ADK KO results in enhanced accumulation of starch (determinant for soluble solid content in tomato at mature red stage) and productivity	potato, tomato	Regierer 2002, Oliver 2007,Dinar and Stevens 1981, Schaffer and Petreikov 1997, Baxter et al., 2005, Centeno 2011
SGN-U215593	Potential GTPase activation protein			KO						↓
SGN-U215996	Ureide permease, putative			OV		↓	↑		↑
SGN-U216025	Not found			KO			↑
SGN-U216118	Chaperone GrpE type 2			KO	↑
SGN-U216214	Alcohol dehydrogenase, putative			OV						↑	aroma, fruits with OV ADH2 and hexanol and hexenol have more intense flavor			Speirs 1998
SGN-U216219	Chloroplast methionine sulfoxide reductase B1 precursor			OV		↑	↓			↑		candidate gene for met-cys content	tomato	Bermúdez 2008
SGN-U216664	Tubulin-specific chaperone C-related			KO		↑	↓			↑
SGN-U217077	GATA transcription factor, putative (ZML1)			KO	↑
SGN-U217454	Transmembrane protein, putative
		SGN-U217379	ankyrin-like protein	OV:OV				↑	↑
		SGN-U217760	Fyve finger-containing phosphoinositide kinase, fyv1, putative	OV:OV				↑
SGN-U218173	Glycyl-tRNA synthetase 2, chloroplast/mitochondrial precursor, putative			OV					↑
SGN-U218174	Amino acid binding protein, putative			KO	↑
SGN-U219181	SRFR1, protein complex scaffold			OV			↑			↓
SGN-U219621	Adenylate kinase, putative											Potato ADK KO results in enhanced accumulation of starch (determinant for soluble solid content in tomato at mature red stage) and productivity	potato, tomato	Regierer 2002, Oliver 2008, Dinar and Stevens 1981, Schaffer and Petreikov 1997, Baxter et al., 2005, Centeno 2011
		SGN-U214286	Not found	KO:KO	↑
		SGN-U215261	AT-HSFA6B, DNA binding/transcription factor	KO:KO	↑
		SGN-U216423	Proline-rich cell wall protein-like	KO:KO	↑
		SGN-U216648	Ribosomal protein	KO:KO	↑
		SGN-U217276	Prefoldin subunit, putative	OV:OV					↑
		SGN-U218446	Vesicle-associated membrane protein, putative	KO:KO	↑
		SGN-U221880	chloroplast lumen common family protein	KO:KO	↑
		SGN-U222097	F-box family protein	KO:KO	↑							F-box has ben described in tomato size QTL	tomato	Huang 2011
		SGN-U223374	amino acid transporter, putative / in SGN as AUX1-like permease	KO:KO	↑							AUX1-like permease has been described in relation to fruit set	tomato	Xiao 2009, Vriezen 2008
		SGN-U225360	Selenoprotein O, putative	KO:KO	↑
		SGN-U231178	Vesicle-associated membrane protein, putative	KO:KO	↑
SGN-U219794	Not found			OV		↓	↑
SGN-U220297	Integral membrane Yip1 family protein			OV		↓						vesicle transport
SGN-U220542	Transcription factor-related			OV		↓	↑
SGN-U220811	Chloroplast inner membrane import protein Tic22, putative			KO		↓	↑			↓
SGN-U221636	Non-cell-autonomous protein pathway1, plasmodesmal receptor			OV	↑			↑	↑	↓		texture? Spatial regulation of pectic polysaccharides arround plastodesmata	tomato	Orfila 2000
SGN-U222265	Chloroplast phosphate transporter precursor (Pht2;1 )			KO		↑	↓					posible role in cell wall and photosynthetic carbohydrate metabolism	potato	Rausch 2004
				OV					↑
SGN-U222649	Pre-mRNA-processing protein prp39, putative
		SGN-U217276	Prefoldin subunit, putative	OV:OV					↑
SGN-U223015	Predicted protein from Populus trichocarpa			KO				↑		↓
SGN-U224209	Putative rac protein			OV					↑			cell wall, sugar accumlation and ripening	tomato	Lu 2001, Lycett 2008, Falchi 2010
		SGN-U214890	50S ribosomal protein L27, chloroplastic	KO:OV				↑				a pre-requisite fro plastid metabolite accumulation during ripening is ribosomal induction/rin,nor and nr mutants present differential expression regulation of RPs	tomato	Kolotilin 2007, Osorio 2011
SGN-U225154	putative glycerophosphoryl diester phosphodiesterase family protein			OV		↑		↑	↑			Fructose & SSC QTL	peach	Ogundiwin 2009
		SGN-U228269	MYB transcription factor	OV:OV				↑				MYB TF has been related flavonoids and glutamine accumulation	tomato	Sapir 2008, Mounet 2009, Ballester 2011
SGN-U225517	GRAM domain-containing protein / ABA-responsive protein-related
		SGN-U216689	putative threonyl-tRNA synthetase	OV:OV				↑
SGN-U225967	Eukaryotic translation initiation factor 2 gamma subunit, putative			KO	↑			↑
SGN-U226059	Longevity assurance factor, putative			KO						↑
SGN-U226069	Cyclic nucleotide-gated calmodulin-binding ion channel			KO		↓	↑
SGN-U226303	ATAB2			KO		↑	↓					ATAB2 is the most downregulated gene in SULF mutant, an auxin deficient mutant, probably due to defects in the Trp-independent pathway, the preferent aux pathway in red-ripe tomato	tomato	Ehlert 2008, Epstein 2002
		SGN-U217898	Not found	OV:OV					↑
		SGN-U218428	dolichyl-phosphate beta-glucosyltransferase, putative	OV:OV					↑
		SGN-U223136	Not found	OV:OV					↑
		SGN-U228429	GTP-binding protein LepA homolog	OV:OV					↑
SGN-U226400	Protein kinase family protein
		SGN-U233328	branched-chain amino acid aminotransferase	OV:OV				↑			aroma, branched aminoacid (Ile, Leu, Val) QTL		tomato	Kochevenko 2011, Maloney 2010
SGN-U227307	Katanin P80 subunit, putative			OV			↓
SGN-U227329	Polynucleotide kinase- 3'-phosphatase, putative			OV		↑	↓	↑	↑	↓
		SGN-U218335	Pantothenate kinase, putative	OV:OV				↑
		SGN-U226473	DEX1, calcium ion binding	OV:OV				↑
SGN-U227429	Cation efflux protein/ zinc transporter, putative			OV			↓			↑
SGN-U227495	Splicing factor 3B subunit, putative			OV	↑
SGN-U227770	ABO1, transcription elongation regulator			KO						↑		ABO1/ELO2 play a role in ABA response and anothyanin production/ABA is downregulated in vtc1 mutant		Zhou 2009, Chen 2006, López-Carbonell 2004
SGN-U231725	Ubiquitin-conjugating enzyme E2, putative (FUS9)			OV					↑			FUS9 invoved in light signaling/manipulation of light signaling modulates phytonutrient content in tomato fruits	tomato	Azari 2010
SGN-U240026	Auxin response factor 8			KO		↓	↑					ARF8 has a role in modulating fruit initiation/mutant genomic Atarf8-4increase in parthenocarpic fruit initiation, fruit size, and weight	tomato	Goetz 2007
X59948	Phytoene dehydrogenase, chloroplastic/chromoplastic			OV		↑		↑		↓	OV PDS/crt in fruit reduce total carotene but increases b-carotene	Arabidopsis KO results in impaired sugar and TCA metabolism in addition to carotene, chlorphyl and GA biosynthesis	tomato, Arabidopsis	Römer 2000, Quin 2007
↑	Perturbation that maximizes fitness
↓	Perturbation that minimizes fitness
OV	Gene over-expressed
KO	Gene knockout

## Sheet: References
Ariizumi T, Higuchi K, Arakaki S, Sano T, Asamizu E, Ezura H. Genetic suppression analysis in novel vacuolar processing enzymes reveals their roles in controlling sugar accumulation in tomato fruits. J Exp Bot. 2011 May;62(8):2773-86.
Azari R, Reuveni M, Evenor D, Nahon S, Shlomo H, Chen L, Levin I. Overexpression of UV-DAMAGED DNA BINDING PROTEIN 1 links plant development and phytonutrient accumulation in high pigment-1 tomato. J Exp Bot. 2010 Aug;61(13):3627-37.
Ballester AR, Molthoff J, de Vos R, Hekkert BL, Orzaez D, Fernández-Moreno JP, Tripodi P, Grandillo S, Martin C, Heldens J, Ykema M, Granell A, Bovy A. Biochemical and molecular analysis of pink tomatoes: deregulated expression of the gene encoding transcription factor SlMYB12 leads to pink tomato fruit color. Plant Physiol. 2010 Jan;152(1):71-84. Epub 2009 Nov 11.
Baxter, C.J, Carrari, F, Bauke, A, Overy, S, Hill, S.A, Quick, P.W, Fernie, A.R, Sweetlove, L.J. (2005) Fruit carbohydrate metabolism in an introgression line of tomato with increased fruit soluble solids Plant and Cell Physiology. 46 (3): pp 425-437.
Bermúdez L, Urias U, Milstein D, Kamenetzky L, Asis R, Fernie AR, Van Sluys MA, Carrari F, Rossi M. A candidate gene survey of quantitative trait loci affecting chemical composition in tomato fruit. Journal of Experimental Botany. 2008;59:2875–2890.
Chen Z, Zhang H, Jablonowski D, Zhou X, Ren X, Hong X, Schaffrath R, Zhu JK,Gong Z. Mutations in ABO1/ELO2, a subunit of holo-Elongator, increase abscisicacid sensitivity and drought tolerance in Arabidopsis thaliana. Mol Cell Biol.2006 Sep;26(18):6902-12.
Cong B., L. S. Barrero, and S. D. Tanksley. 2008. Regulatory change in YABBY-like transcription factor led to evolution of extreme fruit size during tomato domestication. Nature Genetics 4: 800-804
Di Matteo A, Sacco A, Anacleria M, Pezzotti M, Delledonne M, Ferrarini A,Frusciante L, Barone A. The ascorbic acid content of tomato fruits is associated with the expression of genes involved in pectin degradation. BMC Plant Biol. 2010 Aug 6;10:163.
Dinar M, Sevens MA (1981) The relationship between starch accumulation and soluble solids content of tomato fruit. J Am SOC Hortic Sci 106: 415418
Ehlert B, Schöttler MA, Tischendorf G, Ludwig-Müller J, Bock R. The paramutated SULFUREA locus of tomato is involved in auxin biosynthesis. J Exp Bot. 2008;59(13):3635-47.
Epstein E, Cohen JD, Slovin JP . The biosynthetic pathway for indole-3-acetic acid changes during tomato fruit development. Plant Growth Regulation 2002;38:15-20.
Falchi R, Cipriani G, Marrazzo T, Nonis A, Vizzotto G, Ruperti B. Identification and differential expression dynamics of peach small GTPases encoding genes during fruit development and ripening. J Exp Bot. 2010 Jun;61(10):2829-42.
Gao H. Y., B. Z. Zhu, H. L. Zhu, Y. L. Zhang, Y. H. Xie, Y. C. Li and Y. B. Luo. Effect of suppression of ethylene biosynthesis on flavor products in tomato fruits (2007) Russian Journal of Plant Physiology. Volume 54, Number 1, 80-88
Giacomelli L, Rudella A, van Wijk KJ. High light response of the thylakoid proteome in arabidopsis wild type and the ascorbate-deficient mutant vtc2-2. A comparative proteomics study. Plant Physiol. 2006 Jun;141(2):685-701.
Goetz M,Hooper LC, Johnson SD, Rodrigues JCM, Vivian-Smith A, Koltunow AM. Expression of aberrant forms of AUXIN RESPONSE FACTOR8 stimulates parthenocarpy in Arabidopsis and tomato. Plant Physiology 2007;145:351-366
Huang Z, van der Knaap E. Tomato fruit weight 11.3 maps close to fasciated on the bottom of chromosome 11. Theor Appl Genet. 2011 Aug;123(3):465-74
Itai A, Ishihara K, Bewley JD. Characterization of expression, and cloning, of beta-D-xylosidase and alpha-L-arabinofuranosidase in developing and ripening tomato (Lycopersicon esculentum Mill.) fruit. J Exp Bot. 2003 Dec;54(393):2615-22
Kochevenko A, Fernie AR. The genetic architecture of branched-chain amino acid accumulation in tomato fruits. J Exp Bot. 2011 Jul;62(11):3895-906.
Kolotilin I, Koltai H, Tadmor Y, Bar-Or C, Reuveni M, Meir A, Nahon S, Shlomo H, Chen L, Levin I. Transcriptional profiling of high pigment-2dg tomato mutant links early fruit plastid biogenesis with its overproduction of phytonutrients.Plant Physiol. 2007 Oct;145(2):389-401.
Liu Y, Roof S, Ye Z, Barry C, van Tuinen A, Vrebalov J, Bowler C, Giovannoni J. Manipulation of light signal transduction as a means of modifying fruit nutritional quality in tomato. Proc Natl Acad Sci U S A. 2004 Jun 29;101(26):9897-902.
López-Carbonell M, Munné-Bosch S, Alegre L. The ascorbate-deficient vtc-1 Arabidopsis mutant shows altered ABA accumulation in leaves and chloroplasts. Journal of Plant Growth Regulation 2004;25:137-144.
Lu C, Zainal Z, Tucker GA, Lycett GW. Developmental abnormalities and reduced fruit softening in tomato plants expressing an antisense Rab11 GTPase gene. Plant Cell. 2001 Aug;13(8):1819-33
Lycett G. The role of Rab GTPases in cell wall metabolism. J Exp Bot. 2008;59(15):4061-74.
Maloney GS, Kochevenko A, Tieman DM, Tohge T, Krieger U, Zamir D, Taylor MG, Fernie AR, Klee HJ. Characterization of the branched-chain amino acid aminotransferase enzyme family in tomato. Plant Physiol. 2010 Jul;153(3):925-36.
Miron and Schaffer, 1991 D. Miron and A.A. Schaffer, Sucrose phosphate synthase, sucrose synthase, and invertase activities in developing fruit of Lycopersicon esculentum Mill. and sucrose accumulating Lycopersicon hirsutum Humb. and Bonpl.. Plant Physiol., 95 (1991), pp. 623–627
Mounet F, Moing A, Garcia V, Petit J, Maucourt M, et al. Gene and Metabolite Regulatory Network Analysis of Early Developing Fruit Tissues Highlights New Candidate Genes for the Control of Tomato Fruit Composition and Development. Plant Physiology. 2009;149:1505–1528.
Nguyen-Quoc et al., 1999 T. Nguyen-Quoc, H. N’tchobo, C.H. Foyer and S. Yelle, Overexpression of sucrose phosphate synthase increases sucrose unloading in transformed tomato fruit. J. Exp. Bot., 50 (1999), pp. 785–791.
Ogundiwin EA, Peace CP, Gradziel TM, Parfitt DE, Bliss FA, Crisosto CH. A fruit quality gene map of Prunus. BMC Genomics. 2009 Dec 8;10:587
Oliver SN, Tiessen A, Fernie AR, Geigenberger P. Decreased expression of plastidial adenylate kinase in potato tubers results in an enhanced rate of respiration and a stimulation of starch synthesis that is attributable to post-translational redox-activation of ADP-glucose pyrophosphorylase. J Exp Bot.2008;59(2):315-25
Orfila C, Knox JP. Spatial regulation of pectic polysaccharides in relation to pit fields in cell walls of tomato fruit pericarp. Plant Physiol. 2000 Mar;122(3):775-81.
Osorio S, Alba R, Damasceno CM, Lopez-Casado G, Lohse M, Zanor MI, Tohge T, Usadel B, Rose JK, Fei Z, Giovannoni JJ, Fernie AR. Systems biology of tomato fruit development: combined transcript, protein, and metabolite analysis of tomato transcription factor (nor, rin) and ethylene receptor (Nr) mutants reveals novel regulatory interactions. Plant Physiol. 2011 Sep;157(1):405-25.
Qin G, Gu H, Ma L, Peng Y, Deng XW, Chen Z, Qu LJ. Disruption of phytoene desaturase gene results in albino and dwarf phenotypes in Arabidopsis by impairing chlorophyll, carotenoid, and gibberellin biosynthesis. Cell Res. 2007 May;17(5):471-82
Ramakrishna W, Deng Z, Ding CK, Handa AK, Ozminkowski RH Jr. A novel small heat shock protein gene, vis1, contributes to pectin depolymerization and juice viscosity in tomato fruit. Plant Physiol. 2003 Feb;131(2):725-35
Rausch, C., Zimmermann, P., Amrhein, N. and Bucher, M. (2004) Expression analysis suggests novel roles for the plastidic phosphate transporter Pht2;1 in auto- and heterotrophic tissues in potato and Arabidopsis. Plant J. 39, 13–28.
Regierer et al., 2002 B. Regierer, A.R. Fernie, F. Springer, A. Perez-Melis, A. Leisse, K. Koehl, L. Willmitzer, P. Geigenberger and J. Kossmann, Starch content and yield increase as a result of altering adenylate pools in transgenic plants. Nat. Biotech., 20 (2002), pp. 1256–1260
Römer, S.; Fraser, P.; Kiano, J.; Shipton, C.; Misawa, N.; Schuch, W.; Bramley, P. (2000). "Elevation of the provitamin a content of transgenic tomato plants". Nature biotechnology 18 (6): 666–669.
Sapir M, Oren-Shamir M, Ovadia R, Reuveni M, Evenor D, Tadmor Y, Nahon S, Shlomo H, Chen L, Meir A, Levin I. Molecular aspects of Anthocyanin fruit tomato in relation to high pigment-1. J Hered. 2008 May-Jun;99(3):292-303
Schaffer AA, Petreikov M. Sucrose-to-Starch Metabolism in Tomato Fruit Undergoing Transient Starch Accumulation. Plant Physiol. 1997 Mar;113(3):739-746.
SpeirsJ, Corel R, Cain P.2002. Relationship between ADH activity, ripeness and softness in six tomato cultivars. Scientia Horticulturae 93, 137–142.
SpeirsJ, Lee E, Holt K, Yong‐Duk K, Steele N, Loveys B, Schuch W.1998. Genetic manipulation of alcohol dehydrogenase levels in ripening tomato fruit affects the balance of some flavor aldehydes and alcohols. Plant Physiology117,1047–1058.
Stommel, 1992 J.R. Stommel, Enzymatic components of sucrose accumulation in the wild tomato species Lycopersicon peruvianum. Plant Physiol., 99 (1992), pp. 324–328
Vriezen WH, Feron R, Maretto F, Keijman J, Mariani C: Changes in tomato ovary transcriptome demonstrate complex hormonal regulation of fruit set. New Phytol 2008, 177:60–76.
Wang H, Schauer N, Usadel B, Frasse P, Zouine M, Hernould M, Latché A, Pech JC, Fernie AR, Bouzayen M. Regulatory features underlying pollination-dependent JC, Fernie AR, Bouzayen M. Regulatory features underlying pollination-dependent nd -independent tomato fruit set revealed by transcript and primary metabolite profiling. Plant Cell. 2009 May;21(5):1428-52.
Xiao H, Radovich C, Welty N, Hsu J, Li D, Meulia T, van der Knaap E. Integration of tomato reproductive developmental landmarks and expression profiles, and the effect of SUN on fruit shape. BMC Plant Biol. 2009 May 7;9:49.
Zegzouti H, Jones B, Frasse P, Marty C, Maitre B, Latch A, Pech JC, Bouzayen M (1999) Ethylene-regulated gene expression in tomato fruit: characterization of novel ethylene-responsive and ripening-related genes isolated by differential display. Plant J 18:589–600
Zhou X, Hua D, Chen Z, Zhou Z, Gong Z. Elongator mediates ABA responses, oxidative stress resistance and anthocyanin biosynthesis in Arabidopsis. Plant J. 2009 Oct;60(1):79-90.
