# Supplementary material for: Fine-Tuning Tomato Agronomic Properties by Computational Genome Redesign
Source: PubMed Central journal article supplement (PMC3369923; doi:10.1371/journal.pcbi.1002528), 2012-06-07
Supplement: pcbi.1002528.s005.pdf [file pcbi.1002528.s005.pdf]

## Design Specifications

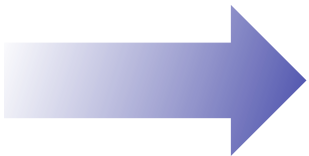

### Maximize:

- fruit weight
- fruit production
- taste & aroma
- (...)

### Minimize:

- guaiacol
- hexanal
- methyl salicylate
- (...)

## Synthetic Cellular Program

```
if glucose > K1
  ↑ <fruit weight>
else if pH < K2
  ↓ [TSS & TA]
while [U243103] < K3
  [β-caroteno] inhibited
  [lycopene] activated
  [U241789] activated
  (...)
```

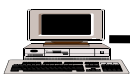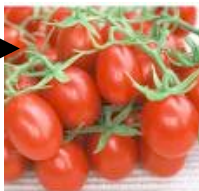

## Circuit Compiler

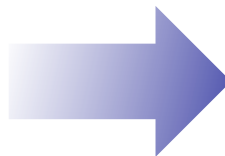

## Programmed Cells

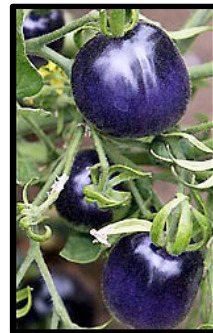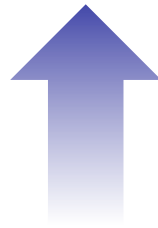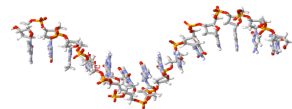

## Genome

010001011110110  
101110100001001
