# Supplementary material for: Fine-Tuning Tomato Agronomic Properties by Computational Genome Redesign
Source: PubMed Central journal article supplement (PMC3369923; doi:10.1371/journal.pcbi.1002528), 2012-06-07

# Genome Model Construction

“-Omics” data

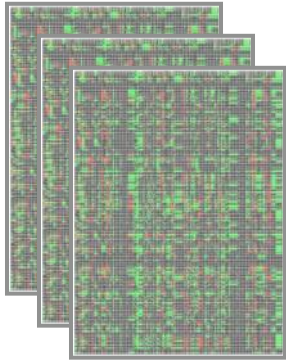

- Transcriptomics (microarrays)
- Metabolomics (metabolic profiles)
- Phenomics (agronomical properties)

Reverse Engineering

Agronomic properties

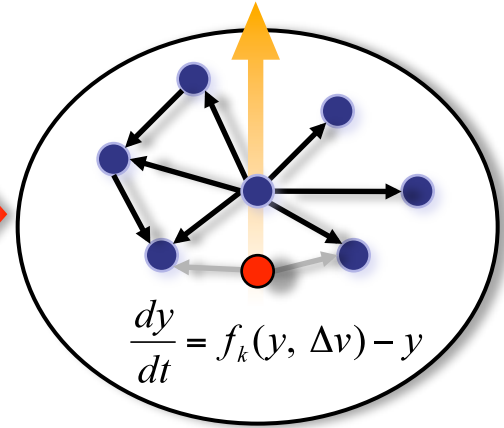

$$\frac{dy}{dt} = f_k(y, \Delta v) - y$$

Effective regulatory model

# Genome Redesign

Compute predicted agronomical properties

Solve gene expression and metabolic profile in steady-state

Suggested mutation

Multiple-objective optimization

Loop N-times

# Experimental Validation

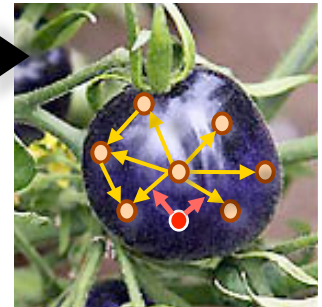

Supplement: pcbi.1002528.s006.pdf [file pcbi.1002528.s006.pdf]
