# Supplementary material for: Fine-Tuning Tomato Agronomic Properties by Computational Genome Redesign
Source: PubMed Central journal article supplement (PMC3369923; doi:10.1371/journal.pcbi.1002528), 2012-06-07

**A**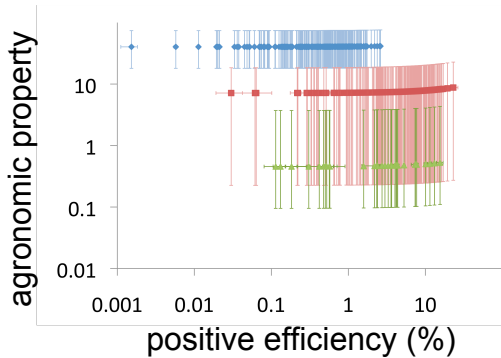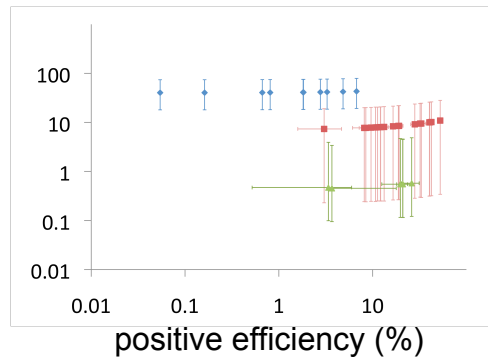**B**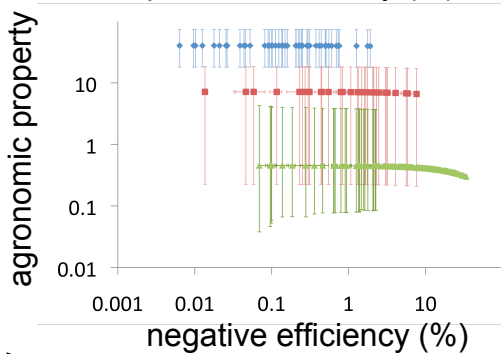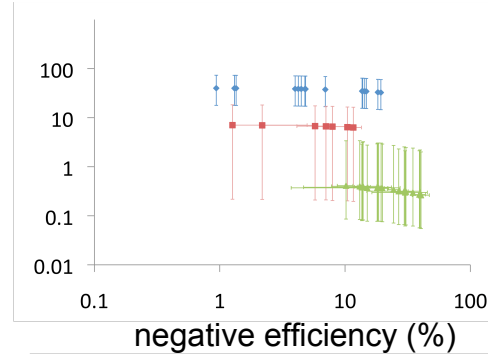**C**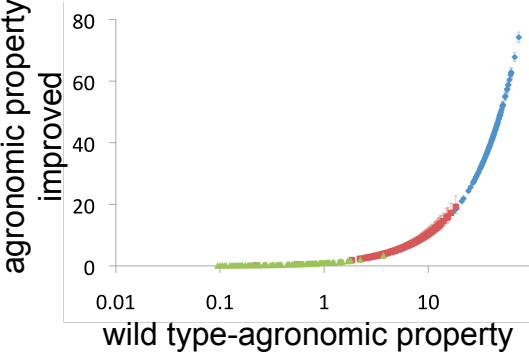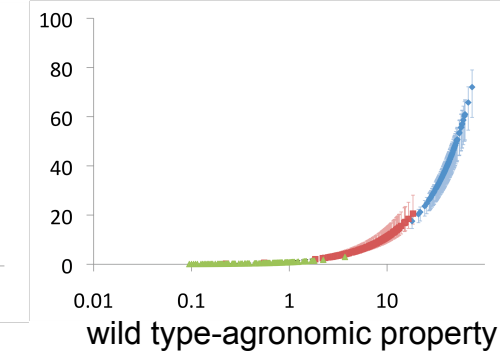**D**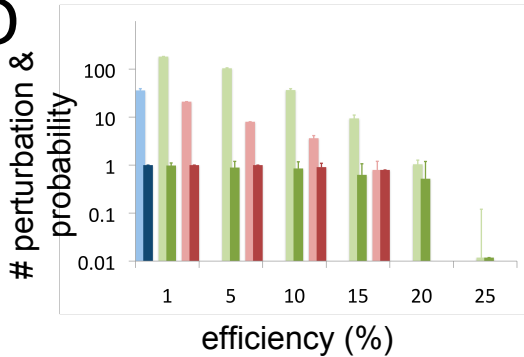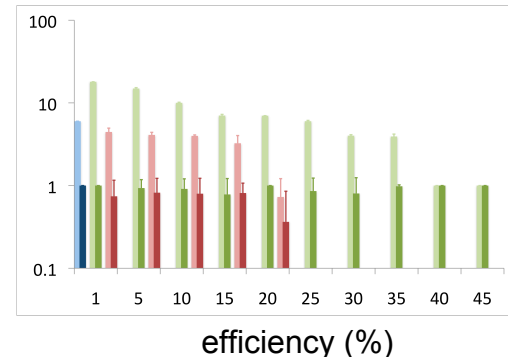

Supplement: pcbi.1002528.s008.pdf [file pcbi.1002528.s008.pdf]
