# Supplementary material for: Fine-Tuning Tomato Agronomic Properties by Computational Genome Redesign
Source: PubMed Central journal article supplement (PMC3369923; doi:10.1371/journal.pcbi.1002528), 2012-06-07
Supplement: pcbi.1002528.s012.pdf [file pcbi.1002528.s012.pdf]

**Table S1. The top 5 single-gene knockouts and over-expressions that maximize the agronomic properties of the tomato fruit based on improve only one objective.**

| Gene                        | Gene Annotation                                                     | Efficiency (%) <sup>†</sup> | RIL | Probability <sup>‡</sup> |
|-----------------------------|---------------------------------------------------------------------|-----------------------------|-----|--------------------------|
| <b>Vitamin C</b>            |                                                                     |                             |     |                          |
| <i>LE4I20</i>               | Serine/threonine protein kinase, putative                           | 2.61                        | 15  | 1                        |
| <i>LE8C21</i>               | Tubulin-specific chaperone C-related                                | 2.55                        | 15  | 1                        |
| <i>LE3E12</i>               | ABO1, transcription elongation regulator                            | 2.37                        | 15  | 1                        |
| <i>LE29C10</i>              | Adenylate kinase 1, putative                                        | 2.19                        | 15  | 1                        |
| <i>LE28L05</i>              | Longevity assurance factor, putative                                | 1.98                        | 15  | 1                        |
| <i>LE20K20</i>              | Cation efflux protein/zinc transporter, putative                    | 6.74                        | 15  | 1                        |
| <i>LE16D22</i>              | Superoxide dismutase [Cu-Zn] 2                                      | 4.84                        | 15  | 1                        |
| <i>LE12J12</i>              | Chloroplast methionine sulfoxide reductase B1 precursor             | 3.27                        | 15  | 1                        |
| <i>LE12P18</i>              | Alcohol dehydrogenase, putative                                     | 2.77                        | 15  | 1                        |
| <i>LE4K23</i>               | Triosephosphate isomerase, chloroplastic                            | 1.83                        | 15  | 1                        |
| <b>Fructose and glucose</b> |                                                                     |                             |     |                          |
| <i>LE13F23</i>              | Chloroplast phosphate transporter precursor                         | 23.66                       | 86  | 0.01                     |
| <i>LE8C21</i>               | Tubulin-specific chaperone C-related                                | 19.88                       | 86  | 0.05                     |
| <i>LE26N09</i>              | 6-Phosphogluconolactonase-like protein                              | 17.45                       | 86  | 1                        |
| <i>LE2C24</i>               | ATAB2; RNA binding                                                  | 17.41                       | 86  | 0.99                     |
| <i>LE32B05</i>              | YABBY2-like transcription factor YAB2                               | 16.56                       | 86  | 0.98                     |
| <i>LE15D07</i>              | Polynucleotide kinase- 3'-phosphatase, putative                     | 52.65                       | 86  | 1                        |
| <i>LE8A19</i>               | Putative glycerophosphoryl diester phosphodiesterase family protein | 42.42                       | 86  | 1                        |
| <i>LE27C02</i>              | Phytoene dehydrogenase, chloroplastic/chromoplastic                 | 40.59                       | 86  | 1                        |
| <i>LE14B20</i>              | Clathrin adaptor complexes medium subunit                           | 40.56                       | 86  | 0.92                     |

| family protein                |                                                           |       |    |      |
|-------------------------------|-----------------------------------------------------------|-------|----|------|
| <i>LE12J12</i>                | Chloroplast methionine sulfoxide reductase B1 precursor   | 52.49 | 86 | 0.01 |
| <b>Malic and citric acids</b> |                                                           |       |    |      |
| <i>LE33H21</i>                | Chloroplast inner membrane import protein Tic22, putative | 16.88 | 13 | 0.79 |
| <i>LE20D08</i>                | Cyclic nucleotide-gated calmodulin-binding ion channel    | 13.99 | 13 | 1    |
| <i>LE25M02</i>                | Auxin response factor 8                                   | 12.05 | 13 | 1    |
| <i>LE25A03</i>                | Ribosomal protein S27-like protein                        | 9.63  | 13 | 0.63 |
| <i>LE18N13</i>                | Not found                                                 | 8.03  | 13 | 1    |
| <i>LE16L04</i>                | Ureide permease, putative                                 | 31.00 | 13 | 0.02 |
| <i>LE1K08</i>                 | Not found                                                 | 25.90 | 13 | 1    |
| <i>LE23D07</i>                | Transcription factor-related                              | 23.38 | 13 | 0.79 |
| <i>LE13M10</i>                | Ribosomal protein L30e                                    | 21.37 | 13 | 0.02 |
| <i>LE14J14</i>                | SRFR1, protein complex scaffold                           | 5.80  | 13 | 0.04 |

Notice that the first five genes is the top 5 of single-gene knockouts (light rows) and the following five is the top 5 in over-expression (dark rows).

† Efficiencies were selected in the RIL where the perturbation maximizes the fitness.

‡ Probability of selecting the given perturbation across the set of RILs at the maximum level of efficiencies.
