# Supplementary material for: Fine-Tuning Tomato Agronomic Properties by Computational Genome Redesign
Source: PubMed Central journal article supplement (PMC3369923; doi:10.1371/journal.pcbi.1002528), 2012-06-07
Supplement: pcbi.1002528.s013.pdf [file pcbi.1002528.s013.pdf]

**Table S2. The top 5 single-gene knockouts and over-expressions that minimize the agronomic properties of the tomato fruit based on improve only one objective.**

| Gene                        | Gene Annotation                                             | Efficiency (%) <sup>†</sup> | RIL |
|-----------------------------|-------------------------------------------------------------|-----------------------------|-----|
| <b>Vitamin C</b>            |                                                             |                             |     |
| <i>LE33G09</i>              | Not found                                                   | -1.91                       | 28  |
| <i>LE33H21</i>              | Chloroplast inner membrane import protein Tic22, putative   | -1.77                       | 28  |
| <i>LE9K02</i>               | Not found                                                   | -1.27                       | 28  |
| <i>LE14J12</i>              | 40S Ribosomal protein S3a-like                              | -0.75                       | 28  |
| <i>LE17I11</i>              | Potential GTPase activation protein                         | -0.73                       | 28  |
| <i>LE14J14</i>              | SRFR1, protein complex scaffold                             | -19.31                      | 28  |
| <i>LE14B20</i>              | Clathrin adaptor complexes medium subunit family protein    | -18.28                      | 28  |
| <i>LE27C02</i>              | Phytoene dehydrogenase, chloroplastic/chromoplastic         | -14.78                      | 28  |
| <i>LE15D07</i>              | Polynucleotide kinase- 3'-phosphatase, putative             | -14.35                      | 28  |
| <i>LE3H15</i>               | Non-cell-autonomous protein pathway1, plasmodesmal receptor | -13.84                      | 28  |
| <b>Fructose and glucose</b> |                                                             |                             |     |
| <i>LE25A03</i>              | Ribosomal protein S27-like protein                          | -7.66                       | 24  |
| <i>LE33H21</i>              | Chloroplast inner membrane import protein Tic22, putative   | -5.33                       | 24  |
| <i>LE20D08</i>              | Cyclic nucleotide-gated calmodulin-binding ion channel      | -5.19                       | 24  |
| <i>LE25M02</i>              | Auxin response factor 8                                     | -3.63                       | 24  |
| <i>LE9K02</i>               | Histone H3.2                                                | -2.98                       | 24  |
| <i>LE13M10</i>              | Ribosomal protein L30e                                      | -12.73                      | 24  |
| <i>LE1K08</i>               | Not found                                                   | -10.46                      | 24  |
| <i>LE16L04</i>              | Ureide permease, putative                                   | -9.27                       | 24  |
| <i>LE23D07</i>              | Transcription factor-related                                | -6.34                       | 24  |
| <i>LE1B05</i>               | Integral membrane Yip1 family protein                       | -6.83                       | 24  |

---

**Malic and citric acids**

---

|                |                                                         |        |     |
|----------------|---------------------------------------------------------|--------|-----|
| <i>LE13F23</i> | Chloroplast phosphate transporter precursor             | -34.10 | 159 |
| <i>LE8C21</i>  | Tubulin-specific chaperone C-related                    | -31.50 | 159 |
| <i>LE18G02</i> | Heat shock protein, putative                            | -30.91 | 159 |
| <i>LE2C24</i>  | ATAB2; RNA binding                                      | -27.77 | 159 |
| <i>LE26N09</i> | 6-Phosphogluconolactonase-like protein                  | -26.09 | 159 |
| <i>LE15D07</i> | Polynucleotide kinase- 3'-phosphatase, putative         | -42.18 | 159 |
| <i>LE12J12</i> | Chloroplast methionine sulfoxide reductase B1 precursor | -40.03 | 159 |
| <i>LE29L04</i> | ER33 protein                                            | -40.45 | 159 |
| <i>LE20K20</i> | Cation efflux protein/ zinc transporter, putative       | -34.99 | 159 |
| <i>LE27I24</i> | Katanin P80 subunit, putative                           | -31.69 | 159 |

Notice that the first five genes is the top 5 of single-gene knockouts (light rows) and the following five is the top 5 in over-expression (dark rows).

† Efficiencies were selected in the RIL where the perturbation maximizes the fitness.
